# Supplementary material for: SCD Inhibition Protects from α-Synuclein-Induced Neurotoxicity But Is Toxic to Early Neuron Cultures
Source: eNeuro. 2021 Aug 7;8(4):ENEURO.0166-21.2021. doi: 10.1523/ENEURO.0166-21.2021 (PMC8387157; doi:10.1523/ENEURO.0166-21.2021)
Supplement: Extended Data Table 1-1 — Meta-analysis RNAseq full data set. Download Table 1-1, XLS file. [file enu-eN-NWR-0166-21-s09.xls]

## Sheet: Meta_analysis_DiseaseAtlas
Rank by max FDR p value	Gene Name	Entrez ID	Description	# of Data Points	Upregulated (%)	Downregulated (%)	Rank Products	Rank Products log2FC	Rank Products (p-value)	Rank Products (FDR)	Combined p-value (Fisher)	Combined p-value (Maximum p-value)	Combined FDR (Fisher)	Combined FDR (Maximum p-value)	D6_3K_PBS_vs_EV_PBS_P31_logFC	D6_3K_PBS_vs_EV_PBS_P31_Pval	D6_3K_PBS_vs_EV_PBS_P31_FDR	D12_3K_PBS_vs_EV_PBS_P31_logFC	D12_3K_PBS_vs_EV_PBS_P31_Pval	D12_3K_PBS_vs_EV_PBS_P31_FDR	D19_3K_PBS_vs_EV_PBS_P31_logFC	D19_3K_PBS_vs_EV_PBS_P31_Pval	D19_3K_PBS_vs_EV_PBS_P31_FDR
1	Lpcat1	210992	lysophosphatidylcholine acyltransferase 1	3	33.3333	0	624.6	0.84	0.001911	0.2247	0	1.31e-90	0	2.64e-86	0.565983	1.1e-30	4.04e-27	0.716032	1.35e-35	2.64e-32	1.23277	2.47e-87	1.58e-83
2	Rnf145	74315	ring finger protein 145	3	0	0	1173	0.61	0.009055	0.3915	0	5.11e-39	0	5.14e-35	0.470198	1.72e-13	3.81e-10	0.465677	2.94e-19	3.46e-16	0.882013	1.12e-42	4.79e-39
3	Rgs4	19736	regulator of G-protein signaling 4	3	0	0	1473	0.44	0.01551	0.4943	0	3.01e-21	0	2.02e-17	0.244756	1.44e-07	0.000228312	0.388056	1.12e-15	7.32e-13	0.692796	2.71e-22	4.33e-19
4	Scd1	20249	stearoyl-Coenzyme A desaturase 1	3	0	33.3333	973.1	-0.67	0.005771	0.3792	0	1.19e-16	0	5.96e-13	-0.460877	1.84e-07	0.000254433	-0.488475	4.91e-06	0.000525119	-1.06327	7.7e-10	1.49e-07
5	Fam102b	329739	family with sequence similarity 102, member B	3	33.3333	0	716	0.84	0.002707	0.2419	0	2.04e-15	0	8.2e-12	0.514227	1.27e-05	0.00738344	0.785197	2.27e-07	1	1.21826	1.17e-10	2.62e-08
6	Acsbg1	94180	acyl-CoA synthetase bubblegum family member 1	3	0	0	2068	-0.25	0.03379	0.6552	0	3.99e-14	0	1.34e-10	-0.222647	3.42e-05	0.0179979	-0.257478	8.81e-12	3.24e-09	-0.278406	3.62e-10	7.59e-08
7	Snn	20621	stannin	3	0	0	1490	0.45	0.01594	0.4984	0	1.85e-13	0	5.31e-10	0.198047	5.7e-05	0.0262624	0.455959	1.65e-17	1.44e-14	0.698775	4.7e-19	4e-16
8	Psat1	107272	phosphoserine aminotransferase 1	3	0	0	1926	-0.29	0.02878	0.6269	5.44e-12	5.33e-13	1.66e-09	1.34e-09	-0.295054	8.11e-05	0.0320381	-0.218238	1.03e-05	0.000946408	-0.344693	1.18e-05	0.000616072
9	Rgcc	66214	regulator of cell cycle	3	0	0	1582	-0.4	0.01831	0.5446	0	4.78e-12	0	1.07e-08	-0.285438	0.000168445	0.0532478	-0.391665	1.96e-11	6.06e-09	-0.51492	1.65e-16	9.31e-14
10	Pcdh8	18530	protocadherin 8	3	0	0	2329	0.26	0.04406	0.7214	0	9.99e-12	0	2.01e-08	0.165518	0.000215364	0.0575804	0.21751	4.84e-09	1.18e-06	0.402963	4.79e-08	5.89e-06
11	Omg	18377	oligodendrocyte myelin glycoprotein	3	0	0	2051	0.3	0.03315	0.6741	1.58e-10	1.95e-11	3.6e-08	3.57e-08	0.328938	2.31e-05	0.0127909	0.243654	0.000269344	0.0135317	0.338899	5.74e-05	0.00224515
12	Me1	17436	malic enzyme 1, NADP(+)-dependent, cytosolic	3	0	0	1926	-0.28	0.02877	0.6273	5.88e-15	4.68e-11	2.75e-12	7.84e-08	-0.278654	0.000360348	0.0830603	-0.252212	1.57e-07	2.64e-05	-0.320571	1.28e-07	1.38e-05
13	Nfil3	18030	nuclear factor, interleukin 3, regulated	3	0	0	1290	0.55	0.01136	0.4341	0	9.22e-11	0	1.37e-07	0.265835	0.000451699	0.0972343	0.454328	8.85e-05	1	0.940365	4.05e-14	1.57e-11
14	Fads1	76267	fatty acid desaturase 1	3	0	0	2438	-0.22	0.04872	0.741	3.58e-12	9.54e-11	1.11e-09	1.37e-07	-0.113455	0.000456994	0.0972343	-0.168701	1.07e-05	0.000953997	-0.368424	1.29e-06	0.000100929
15	Nppc	18159	natriuretic peptide type C	3	0	0	871.1	0.75	0.004402	0.2883	1.32e-12	1.53e-10	4.58e-10	2.06e-07	0.522455	0.00053522	0.11173	0.755392	1.25e-05	1	0.962449	3.27e-07	3.12e-05
16	Bdnf	12064	brain derived neurotrophic factor	3	33.3333	0	887	0.73	0.004603	0.2929	0	2.23e-09	0	2.81e-06	0.603306	7.03e-06	0.00457341	0.495078	0.00130713	1	1.08251	9.86e-22	1.4e-18
17	Nrsn1	22360	neurensin 1	3	0	0	2022	0.32	0.03211	0.6697	2.35e-11	6.62e-09	6.44e-09	7.82e-06	0.243378	0.00187721	0.269733	0.220346	0.000399251	0.0176027	0.506549	6.24e-08	7.25e-06
18	Csrp1	13007	cysteine and glycine-rich protein 1	3	0	0	1800	-0.33	0.02465	0.6031	1.52e-12	1.31e-08	5.11e-10	1.47e-05	-0.360063	0.00235953	0.300067	-0.340578	3.26e-07	5.33e-05	-0.27865	3.3e-06	0.000212175
19	Tpbg	21983	trophoblast glycoprotein	3	0	0	1833	0.36	0.02571	0.6061	2.58e-07	1.59e-08	3.09e-05	1.68e-05	0.302686	0.00158207	0.25102	0.316404	0.00251217	1	0.467475	0.000276407	0.00795665
20	Cdc42se2	72729	CDC42 small effector 2	3	0	0	3233	0.15	0.08941	0.8953	2.34e-12	3.19e-08	7.58e-10	3.05e-05	0.133724	0.00316985	0.330861	0.154421	6.89e-07	0.000106585	0.162741	1.83e-06	0.00013245
21	Lmo3	109593	LIM domain only 3	3	0	0	2694	0.2	0.06061	0.8157	3.76e-07	3.13e-08	4.29e-05	3.05e-05	0.176654	0.00315191	0.330861	0.201787	0.000277646	0.0136	0.215855	0.00190523	0.0343937
22	Acan	11595	aggrecan	3	0	0	684.5	0.85	0.002415	0.244	2.7e-09	4.26e-08	4.72e-07	3.9e-05	0.960701	1.27e-06	0.00108108	0.753737	0.00349387	1	0.836126	0.00171824	0.0319663
23	Scg2	20254	secretogranin II	3	0	0	1870	0.36	0.02692	0.6179	2.28e-12	4.65e-08	7.51e-10	4.07e-05	0.218408	0.00359666	0.368458	0.377485	4.08e-06	0.000444647	0.496583	2.65e-07	2.64e-05
24	Srebf1	20787	sterol regulatory element binding transcription factor 1	3	0	0	1503	-0.43	0.01627	0.525	1.37e-11	6.31e-08	3.82e-09	5.29e-05	-0.359944	0.00398103	0.387406	-0.370235	0.000160647	0.00907964	-0.554941	4.1e-08	5.24e-06
25	Ndrg2	29811	N-myc downstream regulated gene 2	3	0	0	2095	-0.25	0.0348	0.6651	0	1.09e-07	0	8.44e-05	-0.186866	0.00477967	0.413143	-0.257349	9.87e-12	3.41e-09	-0.304182	4.6e-08	5.8e-06
26	Mapk4	225724	mitogen-activated protein kinase 4	3	0	0	1911	0.35	0.02827	0.6315	3.2e-07	1.05e-07	3.76e-05	8.44e-05	0.384427	0.00185899	0.269733	0.35488	0.00472367	1	0.298444	0.000158943	0.00499129
27	Klhl2	77113	kelch-like 2, Mayven	3	0	0	5117	-0.07	0.223	1.031	1.62e-09	1.19e-07	2.99e-07	8.86e-05	0.16075	0.00021749	0.0575804	-0.117471	0.00491766	0.115624	-0.241334	4.1e-06	0.000258341
28	Cartpt	27220	CART prepropeptide	3	0	0	825.9	0.8	0.003861	0.2813	3.96e-11	1.27e-07	9.84e-09	9.09e-05	0.499148	0.00502079	0.430542	1.02561	8.23e-07	1	0.885597	1.98e-05	0.000942995
29	Serpinh1	12406	serine (or cysteine) peptidase inhibitor, clade H, member 1	3	0	0	1711	-0.36	0.02197	0.5881	0	1.51e-07	0	0.000105006	-0.21308	0.00533035	0.440544	-0.374343	8.12e-14	3.67e-11	-0.488134	1.49e-12	4.48e-10
30	Satb1	20230	special AT-rich sequence binding protein 1	3	0	0	2205	0.28	0.039	0.6958	5.27e-11	1.76e-07	1.28e-08	0.000117867	0.379559	3.68e-07	0.000452146	0.194411	0.00560259	0.126176	0.27381	5.37e-05	0.00212389
31	Dusp1	19252	dual specificity phosphatase 1	3	0	0	1573	0.4	0.01808	0.5246	3.83e-14	2.02e-07	1.57e-11	0.00013082	0.266243	0.0022528	0.291394	0.272447	0.00586447	1	0.66166	3.91e-12	1.14e-09
32	Lgi2	246316	leucine-rich repeat LGI family, member 2	3	0	0	1480	0.46	0.01568	0.4964	4.91e-11	2.65e-07	1.2e-08	0.000166674	0.209209	0.00642525	0.483917	0.563799	3.3e-06	1	0.593704	4.85e-06	0.000294985
33	Rab11a	53869	RAB11A, member RAS oncogene family	3	0	0	3315	0.15	0.0942	0.9141	5.77e-11	2.94e-07	1.38e-08	0.000178844	0.102829	0.0066458	0.483917	0.129455	0.000390663	0.0176027	0.228286	4.7e-08	5.83e-06
34	Ephx2	13850	epoxide hydrolase 2, cytoplasmic	3	0	0	1715	-0.35	0.02207	0.5884	6.5e-09	3.13e-07	1.09e-06	0.000184825	-0.349932	0.00678627	0.483917	-0.356546	9.34e-05	0.00610081	-0.331843	3.11e-05	0.00135824
35	Fgfr3	14184	fibroblast growth factor receptor 3	3	0	0	2220	-0.23	0.03961	0.6914	2.15e-06	3.41e-07	0.000207738	0.00019605	-0.212631	0.00698816	0.483917	-0.240228	0.000666427	0.0268305	-0.232074	0.0024766	0.0418229
36	Tmem50b	77975	transmembrane protein 50B	3	0	0	1800	0.35	0.02467	0.5962	0	3.75e-07	0	0.000209664	0.141934	0.00721373	0.494118	0.301725	3.63e-15	2.14e-12	0.615174	8.23e-31	2.1e-27
37	Tsc2	22084	tuberous sclerosis 2	3	0	0	2053	-0.29	0.03325	0.6515	0	4.01e-07	0	0.00021341	-0.122583	0.0073758	0.497597	-0.368247	2.11e-17	1.55e-14	-0.366576	8.79e-09	1.34e-06
38	Rgs2	19735	regulator of G-protein signaling 2	3	0	0	1925	0.34	0.02873	0.6314	9.85e-08	4.03e-07	1.3e-05	0.00021341	0.317566	0.00409911	0.387406	0.24872	0.0073884	1	0.442825	1.26e-05	0.000655295
39	Fos	14281	FBJ osteosarcoma oncogene	3	33.3333	0	705	0.83	0.002603	0.2412	0	7.5e-07	0	0.000386679	0.54628	0.00908565	0.547019	0.916785	1.03e-07	1	1.02089	1.51e-12	4.48e-10
40	Sh3bp5l	79566	SH3 binding domain protein 5 like	3	0	0	2299	0.25	0.04282	0.7156	2.11e-09	9.38e-07	3.8e-07	0.000471291	0.222073	0.00266117	0.309929	0.20542	0.0097874	0.180346	0.335768	2.24e-07	2.26e-05
41	Csnk1e	27373	casein kinase 1, epsilon	3	0	0	3323	0.14	0.09466	0.9146	1.05e-05	1.24e-06	0.000817345	0.000609635	0.134529	0.00257045	0.306979	0.14428	0.0107523	0.192689	0.153537	0.0024701	0.0418229
42	Ncdn	26562	neurochondrin	3	0	0	2502	0.22	0.05158	0.77	5.48e-09	1.4e-06	9.33e-07	0.00066981	0.204215	0.0111845	0.602156	0.230768	2.1e-06	0.000268383	0.228067	0.000697632	0.0163006
43	B4galt5	56336	UDP-Gal:betaGlcNAc beta 1,4-galactosyltransferase, polypeptide 5	3	0	0	1615	0.4	0.01922	0.5331	0	1.66e-06	0	0.000777249	0.197669	0.0118457	0.605197	0.338817	3.7e-06	0.000418382	0.658629	4.91e-14	1.84e-11
44	Elovl2	54326	elongation of very long chain fatty acids (FEN1/Elo2, SUR4/Elo3, yeast)-like 2	3	0	0	3251	-0.13	0.09041	0.914	4.28e-06	1.82e-06	0.000386023	0.000831859	-0.115726	0.0122101	0.605795	-0.164182	0.000254892	0.0131426	-0.117171	0.00800884	0.0951311
45	Gng3	14704	guanine nucleotide binding protein (G protein), gamma 3	3	0	0	2253	0.3	0.04091	0.7013	0	2.09e-06	0	0.000874523	0.120169	0.0127807	0.620441	0.281515	6.47e-10	1.81e-07	0.497706	3.79e-18	2.85e-15
46	Peli1	67245	pellino 1	3	0	0	3025	0.17	0.07767	0.8548	4.69e-08	2.04e-06	6.55e-06	0.000874523	0.125983	0.0126829	0.620441	0.158208	0.000399069	0.0176027	0.230321	3.35e-05	0.00145092
47	Mid1ip1	68041	Mid1 interacting protein 1 (gastrulation specific G12-like (zebrafish))	3	0	0	2440	-0.2	0.04881	0.7412	5.22e-07	2.05e-06	5.83e-05	0.000874523	-0.224134	0.000331751	0.0785073	-0.169736	0.0127033	0.213384	-0.207627	0.000568232	0.0138599
48	Hs3st1	15476	heparan sulfate (glucosamine) 3-O-sulfotransferase 1	3	0	0	1819	0.38	0.02525	0.6015	7.01e-07	1.97e-06	7.58e-05	0.000874523	0.366568	0.00294623	0.322432	0.252621	0.0125297	1	0.505224	9e-05	0.00318706
49	Scd2	20250	stearoyl-Coenzyme A desaturase 2	3	0	0	2760	-0.18	0.06385	0.812	2.16e-09	2.39e-06	3.84e-07	0.00097926	-0.100821	0.0133634	0.636444	-0.13093	1.51e-05	0.00125419	-0.312714	2.95e-05	0.00130611
50	Slc7a11	26570	solute carrier family 7 (cationic amino acid transporter, y+ system), member 11	3	0	33.3333	1007	-0.65	0.006265	0.3912	3.08e-12	2.68e-06	9.82e-10	0.00107704	-0.37231	0.0138873	0.645585	-0.535726	0.000568395	0.0236952	-1.03727	6.81e-10	1.36e-07
51	Hs3st5	319415	heparan sulfate (glucosamine) 3-O-sulfotransferase 5	3	0	0	1428	0.46	0.01442	0.4777	1.22e-15	2.89e-06	6.46e-13	0.00113766	0.527264	8.36e-12	1.54e-08	0.260874	0.0142368	1	0.606536	1.11e-05	0.000585362
52	Fbln2	14115	fibulin 2	3	0	0	817.3	-0.7	0.003762	0.3261	8.1e-09	4.17e-06	1.35e-06	0.00155138	-0.79269	8.4e-05	0.0320559	-0.453426	0.0160912	1	-0.849044	1.85e-05	0.000893879
53	Cck	12424	cholecystokinin	3	0	0	2290	-0.22	0.04245	0.7095	3.34e-07	4.1e-06	3.86e-05	0.00155138	-0.181586	0.0160105	0.700157	-0.176056	7.1e-05	0.00479836	-0.299663	0.00128647	0.0254132
54	Ccsap	73420	centriole, cilia and spindle associated protein	3	0	0	1918	0.34	0.0285	0.6339	0.000115671	4.07e-06	0.00651486	0.00155138	0.386639	0.00886047	0.538638	0.333776	0.015963	1	0.30723	0.00747343	0.0905414
55	Zfand5	22682	zinc finger, AN1-type domain 5	3	0	0	3670	0.12	0.1162	0.9706	5.59e-05	4.65e-06	0.003418	0.0016998	0.106477	0.0145682	0.663303	0.119234	0.00188338	0.0570643	0.143757	0.0166906	0.156051
56	Fezf2	54713	Fez family zinc finger 2	3	0	0	1789	0.35	0.02431	0.5917	3.16e-10	5.27e-06	6.76e-08	0.00189381	0.213969	0.000108631	0.0375593	0.185939	0.0174071	0.253813	0.659443	3.99e-07	3.69e-05
57	Wnt7b	22422	wingless-type MMTV integration site family, member 7B	3	0	0	2936	-0.16	0.07288	0.8441	2.18e-08	5.53e-06	3.34e-06	0.00195005	-0.116651	0.0176817	0.714103	-0.123773	0.00909028	0.172364	-0.227204	4.56e-07	4.02e-05
58	Pcdh20	219257	protocadherin 20	3	0	0	1953	0.32	0.02971	0.6444	6.96e-05	6.04e-06	0.00416692	0.00209242	0.307825	0.0121433	0.605197	0.282058	0.0182072	1	0.380447	0.0026637	0.0441565
59	Chac1	69065	ChaC, cation transport regulator 1	3	0	0	4220	-0.03	0.1539	1.015	1.89e-06	6.62e-06	0.000183695	0.0022568	-0.265439	0.00249929	0.306979	-0.224784	0.0187787	1	0.388694	0.000213107	0.00639372
60	Nell1	338352	NEL-like 1	3	0	0	2459	0.23	0.04966	0.7582	8.82e-06	7.33e-06	0.000721188	0.00245782	0.178866	0.019429	0.723781	0.274098	0.000333058	0.015788	0.241534	0.00868211	0.100216
61	Cited2	17684	Cbp/p300-interacting transactivator, with Glu/Asp-rich carboxy-terminal domain, 2	3	0	0	2124	0.29	0.03587	0.6811	1.01e-07	7.94e-06	1.32e-05	0.00261666	0.352977	2.56e-06	0.0020246	0.222742	0.00766341	0.150372	0.301386	0.0199485	0.175714
62	Stmn4	56471	stathmin-like 4	3	0	0	3298	0.16	0.09322	0.9138	3.46e-09	9.13e-06	5.94e-07	0.00296008	0.135867	0.0003335	0.0785073	0.0869766	0.0208985	0.278349	0.250481	1.43e-06	0.000108687
63	Nr4a2	18227	nuclear receptor subfamily 4, group A, member 2	3	33.3333	0	1205	0.6	0.009648	0.4016	0	9.49e-06	0	0.00302885	0.372356	5.79e-06	0.00427166	0.289388	0.0211718	1	1.14482	4.82e-17	3.24e-14
64	Tcte1	21645	t-complex-associated testis expressed 1	3	0	0	3026	0.17	0.07774	0.8541	0.00043509	1.16e-05	0.018574	0.00364037	0.166778	0.0115925	0.602156	0.131758	0.0226287	0.292333	0.213434	0.0188861	0.168799
65	Secisbp2l	70354	SECIS binding protein 2-like	3	0	0	3014	0.17	0.0771	0.8537	8.23e-05	1.22e-05	0.004837	0.00378591	0.160309	0.0230451	0.784526	0.152761	0.00990653	0.18084	0.191561	0.00312533	0.0494367
66	Gstm5	14866	glutathione S-transferase, mu 5	3	0	0	2098	-0.28	0.03492	0.6649	0.000124487	1.41e-05	0.0068955	0.00429769	-0.429028	0.00252746	0.306979	-0.165906	0.0241626	0.303478	-0.236668	0.0188432	0.168534
67	Jund	16478	jun D proto-oncogene	3	0	0	2447	0.24	0.04911	0.7567	3.34e-08	1.52e-05	4.8e-06	0.00455217	0.210732	0.0115882	0.602156	0.155749	0.0247542	0.308273	0.35911	4.08e-07	3.73e-05
68	Slain2	75991	SLAIN motif family, member 2	3	0	0	2887	0.18	0.07033	0.8353	9.04e-05	1.57e-05	0.00523992	0.00462874	0.147334	0.0250154	0.803304	0.173989	0.00898186	0.170859	0.221782	0.00354087	0.0540046
69	Gm45837	207728	predicted gene 45837	3	0	0	1560	-0.37	0.01773	0.5435	0	1.76e-05	0	0.0051369	-0.140761	0.0260256	0.81341	-0.295266	6.69e-15	3.57e-12	-0.67941	4.6e-26	9.8e-23
70	Rapgef5	217944	Rap guanine nucleotide exchange factor (GEF) 5	3	0	0	1909	0.36	0.0282	0.6313	7.45e-07	1.92e-05	7.92e-05	0.00551732	0.210953	0.026781	0.827667	0.294499	0.00277169	0.0783269	0.576496	4.78e-05	0.00194057
71	Eif4ebp1	13685	eukaryotic translation initiation factor 4E binding protein 1	3	0	0	1854	-0.32	0.02639	0.6141	1.25e-07	2.13e-05	1.61e-05	0.00602657	-0.359631	4.91e-05	0.0247103	-0.333521	0.000363662	0.0168773	-0.252665	0.0277115	0.214928
72	Ephx1	13849	epoxide hydrolase 1, microsomal	3	0	0	1974	-0.27	0.03041	0.6336	2.89e-15	2.6e-05	1.42e-12	0.00724829	-0.212508	0.0296079	0.867022	-0.272674	3.06e-06	0.000374691	-0.334611	3.81e-11	9.36e-09
73	Id2	15902	inhibitor of DNA binding 2	3	0	0	2581	0.21	0.05521	0.7918	7.03e-05	3.19e-05	0.00419525	0.00877501	0.267158	0.00138347	0.233552	0.178331	0.0317011	0.34819	0.195299	0.0135796	0.135594
74	Slc7a5	20539	solute carrier family 7 (cationic amino acid transporter, y+ system), member 5	3	0	0	2687	-0.18	0.06025	0.805	4.74e-08	3.68e-05	6.57e-06	0.00998922	-0.236429	1.2e-06	0.00108108	-0.129308	0.00429135	0.104666	-0.177252	0.033251	0.235839
75	Lix1	66643	limb and CNS expressed 1	3	0	0	2428	-0.2	0.04831	0.7409	4.88e-06	4.91e-05	0.000437637	0.0131664	-0.169863	0.0366207	0.925828	-0.167938	0.0034375	0.0914387	-0.262142	0.000229069	0.00676149
76	Deaf1	54006	DEAF1, transcription factor	3	0	0	2760	-0.17	0.06386	0.8117	2.32e-06	5.12e-05	0.000222314	0.0135364	-0.131776	0.0117761	0.605197	-0.227338	2.88e-05	0.00213999	-0.154346	0.0371241	0.251291
77	Olfm3	229759	olfactomedin 3	3	0	0	2868	0.18	0.06933	0.8347	0.00129602	5.34e-05	0.0440732	0.0139516	0.173957	0.0171888	0.714103	0.170749	0.0279889	0.333709	0.196223	0.0376636	0.252847
78	Arid5a	214855	AT rich interactive domain 5A (MRF1-like)	3	0	0	1325	0.51	0.0121	0.4447	3.35e-10	5.61e-05	7.09e-08	0.0144605	0.451425	0.00278865	0.318078	0.325173	0.0382805	1	0.753073	7.53e-09	1.19e-06
79	Adcyap1	11516	adenylate cyclase activating polypeptide 1	3	0	0	2183	0.3	0.03813	0.6895	1.93e-05	5.88e-05	0.00136414	0.0145904	0.199669	0.00442694	0.400247	0.187768	0.0388808	1	0.512467	0.000789347	0.0178245
80	Brinp3	215378	bone morphogenetic protein/retinoic acid inducible neural specific 3	3	0	0	2286	0.26	0.04226	0.7099	0.000746423	5.81e-05	0.0288068	0.0145904	0.27187	0.0114187	0.602156	0.189734	0.0387262	1	0.310636	0.0212077	0.182652
81	Fam160b1	226252	family with sequence similarity 160, member B1	3	0	0	2750	0.19	0.06335	0.8181	0.00133145	5.75e-05	0.0446937	0.0145904	0.159294	0.0386057	0.936841	0.191777	0.0286221	0.33581	0.229804	0.0169378	0.157597
82	Phgdh	236539	3-phosphoglycerate dehydrogenase	3	0	0	3225	-0.13	0.08894	0.9133	0.000601226	6.09e-05	0.0239858	0.0149381	-0.0972789	0.0393478	0.936841	-0.135337	0.00730175	0.144999	-0.170788	0.0252578	0.204058
83	Slco1c1	58807	solute carrier organic anion transporter family, member 1c1	3	0	0	978.3	-0.56	0.005847	0.3792	0	6.63e-05	0	0.0160714	-0.372145	0.0404819	0.946918	-0.597981	3.13e-12	1.31e-09	-0.708391	2.64e-20	2.81e-17
84	Kifc2	16581	kinesin family member C2	3	0	0	1512	0.49	0.01648	0.4991	5.89e-10	6.98e-05	1.21e-07	0.0166969	0.419816	0.0411645	0.95167	0.507115	6.96e-06	0.000690291	0.550147	5.15e-06	0.000307797
85	S100b	20203	S100 protein, beta polypeptide, neural	3	0	0	2396	-0.21	0.04689	0.7366	2.91e-11	7.23e-05	7.59e-09	0.0171057	-0.154585	0.0416618	0.95167	-0.241204	7.47e-08	1.37e-05	-0.220107	1.88e-05	0.000904854
86	Casp3	12367	caspase 3	3	0	0	2527	0.27	0.05269	0.7728	0	7.39e-05	0	0.0172673	0.097592	0.0419558	0.95167	0.186279	8.64e-05	0.00570359	0.533836	4.4e-20	4.01e-17
87	Bace2	56175	beta-site APP-cleaving enzyme 2	3	0	0	1408	0.46	0.01396	0.4727	2.75e-11	7.62e-05	7.27e-09	0.0175209	0.33419	0.0424005	0.953434	0.439392	0.000831389	1	0.603876	1.57e-09	2.86e-07
88	Tbc1d9	71310	TBC1 domain family, member 9	3	0	0	3173	0.16	0.08595	0.8795	0.000162553	7.67e-05	0.00851157	0.0175209	0.142942	0.0214107	0.756831	0.123395	0.0424845	0.400587	0.211483	0.00172344	0.0320164
89	Satb2	212712	special AT-rich sequence binding protein 2	3	0	0	3054	0.16	0.07925	0.8571	0.0014588	9.15e-05	0.0482437	0.0206672	0.139574	0.0450583	0.956359	0.161431	0.0111745	0.197842	0.194022	0.0414841	0.266543
90	Ppp3ca	19055	protein phosphatase 3, catalytic subunit, alpha isoform	3	0	0	2882	-0.17	0.07005	0.835	2.5e-10	9.27e-05	5.52e-08	0.0207137	-0.103258	0.0452603	0.956359	-0.115326	0.00159089	0.0500126	-0.289303	8.15e-09	1.26e-06
91	Rcan2	53901	regulator of calcineurin 2	3	0	0	2649	0.21	0.05843	0.8069	1.26e-06	9.79e-05	0.000125565	0.020989	0.23688	0.000437081	0.0972343	0.134907	0.0460841	0.4171	0.266365	0.000314665	0.00885843
92	Sat1	20229	spermidine/spermine N1-acetyl transferase 1	3	0	0	2598	0.22	0.05601	0.7987	6.45e-06	9.81e-05	0.000544749	0.020989	0.190481	0.0112117	0.602156	0.156843	0.0461237	0.4171	0.304748	7.63e-05	0.00284419
93	Pcp4	18546	Purkinje cell protein 4	3	0	0	2470	0.23	0.05015	0.7622	1.36e-05	9.73e-05	0.000998158	0.020989	0.221605	0.00523317	0.438635	0.162583	0.0460006	0.4171	0.312687	0.000378862	0.0101942
94	Mfsd2a	76574	major facilitator superfamily domain containing 2A	3	0	0	1419	-0.39	0.01422	0.4889	0.000159412	9.59e-05	0.00841283	0.020989	-0.262169	0.0286955	0.857019	-0.27693	0.0457793	1	-0.641942	0.00116665	0.0236387
95	Ddit4l	73284	DNA-damage-inducible transcript 4-like	3	0	0	1159	-0.53	0.008794	0.423	0.000380248	9.97e-05	0.0166572	0.0211037	-0.663633	0.00673014	0.483917	-0.5359	0.0463709	1	-0.384008	0.0135489	0.135393
96	Cd47	16423	CD47 antigen (Rh-related antigen, integrin-associated signal transducer)	3	0	0	3121	0.16	0.083	0.8715	1.6e-05	0.0001008	0.00116954	0.0211123	0.194329	0.000730621	0.146974	0.137442	0.00323364	0.0875914	0.147599	0.0465393	0.287352
97	Nudt4	71207	nudix (nucleoside diphosphate linked moiety X)-type motif 4	3	0	0	3352	0.15	0.09642	0.921	1.51e-07	0.000123762	1.91e-05	0.0256544	0.0876071	0.0498343	0.979338	0.133665	0.000839522	0.0307281	0.243004	1.46e-05	0.000727525
98	Pdgfd	71785	platelet-derived growth factor, D polypeptide	3	0	0	2866	-0.08	0.06925	0.8327	0.00123941	0.000128216	0.0427975	0.0263065	0.785961	0.0504252	1	-0.426122	0.0448702	1	-0.594748	0.00759065	0.0915883
99	Fbln5	23876	fibulin 5	3	0	0	1054	-0.6	0.007001	0.4057	7.19e-06	0.00013757	0.00060267	0.0279406	-0.504747	0.0516228	0.998227	-0.454609	0.0110048	1	-0.855626	7.86e-05	0.00289425
100	Slc16a14	71781	solute carrier family 16 (monocarboxylic acid transporters), member 14	3	0	0	2219	-0.25	0.03958	0.692	0.000269521	0.000150749	0.0130268	0.0303111	-0.349122	0.00163378	0.254594	-0.185093	0.0324903	0.353734	-0.202234	0.0532212	0.309902
101	Large1	16795	LARGE xylosyl- and glucuronyltransferase 1	3	0	0	2754	-0.17	0.06354	0.8127	3.18e-09	0.000159507	5.52e-07	0.0315487	-0.114711	0.0542325	0.999548	-0.146144	0.000268021	0.0135317	-0.255776	6.26e-07	5.23e-05
102	Hip1r	29816	huntingtin interacting protein 1 related	3	0	0	2338	0.25	0.04442	0.7244	0.000112065	0.000160042	0.00634731	0.0315487	0.2173	0.0542931	0.999548	0.282174	0.00209119	0.0620809	0.241048	0.00897548	0.102516
103	Sla	20491	src-like adaptor	3	0	0	2258	-0.23	0.04112	0.7013	1.44e-08	0.000163096	2.24e-06	0.0318385	-0.314777	7.24e-07	0.000728362	-0.182873	0.00117952	0.0400764	-0.203567	0.0546362	0.314836
104	S1pr3	13610	sphingosine-1-phosphate receptor 3	3	0	0	3805	-0.08	0.1251	0.9897	0.000508835	0.000165407	0.0210952	0.0319793	-0.33459	0.0167982	0.714103	-0.306605	0.0548932	1	0.39013	0.00646156	0.0825852
105	Gpi1	14751	glucose phosphate isomerase 1	3	0	0	3082	-0.16	0.08081	0.8787	1.11e-16	0.000171476	6.38e-14	0.0328368	-0.0656716	0.0555564	0.999548	-0.117735	8.95e-06	0.00083521	-0.302023	3.25e-13	1.04e-10
106	Slc3a2	17254	solute carrier family 3 (activators of dibasic and neutral amino acid transport), member 2	3	0	0	2883	-0.16	0.07014	0.8355	2.57e-10	0.000190956	5.61e-08	0.0362222	-0.168537	0.000210719	0.0575804	-0.221665	4.98e-08	9.76e-06	-0.0996226	0.0575852	0.322564
107	Ngef	53972	neuronal guanine nucleotide exchange factor	3	0	0	6085	0.02	0.3053	1.061	0.00212788	0.000205023	0.0645328	0.0385272	0.120211	0.0589659	0.999548	0.0996904	0.0200972	0.276008	-0.172881	0.0278057	0.215032
108	Rps6kc1	320119	ribosomal protein S6 kinase polypeptide 1	3	0	0	2600	-0.2	0.05608	0.7858	5.91e-08	0.00021517	8.08e-06	0.0400594	-0.11412	0.059923	0.999548	-0.288292	1.36e-06	0.000194768	-0.184645	0.0026802	0.0442008
109	Cnn3	71994	calponin 3, acidic	3	0	0	9005	0.02	0.5671	1.077	2.28e-07	0.000226212	2.8e-05	0.0417288	-0.109391	0.0282293	0.851033	-0.0812327	0.060931	0.471565	0.251858	5.6e-07	4.83e-05
110	Thop1	50492	thimet oligopeptidase 1	3	0	0	2481	-0.2	0.05062	0.7573	1.63e-06	0.000231349	0.00016102	0.0422885	-0.123916	0.0613888	0.999548	-0.172366	0.00104117	0.0368674	-0.305475	0.000132219	0.00433304
111	Fads2	56473	fatty acid desaturase 2	3	0	0	2515	-0.2	0.05218	0.7669	0.000487106	0.000235719	0.0202779	0.0423558	-0.129574	0.061773	0.999548	-0.142765	0.0297104	0.339892	-0.330807	0.00308357	0.0489436
112	Hspa8	15481	heat shock protein 8	3	0	0	6880	-0.02	0.3763	1.094	0.00223891	0.00023593	0.0670906	0.0423558	0.103636	0.0617914	0.999548	-0.0792673	0.0184678	0.267287	-0.0847572	0.0307134	0.225475
113	Cnp	12799	2',3'-cyclic nucleotide 3' phosphodiesterase	3	0	0	4449	0.12	0.1707	1.026	3.33e-07	0.000244914	3.86e-05	0.0435795	-0.214983	0.000145496	0.047346	0.222067	0.000160425	0.00907964	0.365654	0.0625659	0.335848
114	Unkl	74154	unkempt family like zinc finger	3	0	0	2028	0.31	0.03234	0.6697	0.00120694	0.000248246	0.0420742	0.0437287	0.392917	0.00473694	0.413143	0.271541	0.0628484	1	0.281231	0.0558822	0.318001
115	Tmod4	50874	tropomodulin 4	3	0	0	854.3	-0.64	0.004197	0.3416	0.00681754	0.000250102	0.148677	0.0437287	-1.75089	0.0630046	1	1.34755	0.0417836	1	-1.508	0.0524386	1
116	Rab3b	69908	RAB3B, member RAS oncogene family	3	0	0	2704	0.23	0.06109	0.8162	9.7e-08	0.000262394	1.29e-05	0.0454823	0.140006	0.0520162	0.999145	0.120551	0.0640203	0.480602	0.433888	1.13e-07	1.22e-05
117	Ttyh1	57776	tweety family member 1	3	0	0	3236	-0.13	0.08957	0.9133	0.000169452	0.000299031	0.00884978	0.0499788	-0.139157	0.0218532	0.762725	-0.10329	0.00112581	0.0391569	-0.155725	0.0668711	0.349849
118	Tec	21682	tec protein tyrosine kinase	3	0	0	1007	0.62	0.006265	0.3377	0.000277936	0.000300763	0.0132743	0.0499788	0.616316	0.00310368	0.330184	0.544832	0.067	1	0.690625	0.0140829	0.138991
119	AI593442	330941	expressed sequence AI593442	3	0	0	3545	0.13	0.1083	0.9514	0.00243249	0.000294685	0.0710902	0.0499788	0.116217	0.0665456	0.999548	0.153094	0.01234	0.210245	0.116328	0.0472062	0.289373
120	Arf1	11840	ADP-ribosylation factor 1	3	0	0	7107	-0.02	0.3968	1.106	0.00373631	0.000298955	0.0966873	0.0499788	0.087324	0.0571221	0.999548	-0.0589028	0.0668655	0.492083	-0.0900233	0.0171517	0.158737
121	Sema4b	20352	sema domain, immunoglobulin domain (Ig), transmembrane domain (TM) and short cytoplasmic domain, (semaphorin) 4B	3	0	0	2343	-0.21	0.04462	0.7189	0.00988996	0.000298514	0.194958	0.0499788	-0.179896	0.055613	0.999548	-0.219224	0.0668326	1	-0.23031	0.0593055	0.326576
122	Arl4a	11861	ADP-ribosylation factor-like 4A	3	0	0	2669	0.2	0.0594	0.8125	8.32e-06	0.000308577	0.000688303	0.050857	0.267669	0.000211855	0.0575804	0.191523	0.00367222	0.0955103	0.152526	0.0675753	0.352876
123	Grm2	108068	glutamate receptor, metabotropic 2	3	0	0	2084	0.31	0.03439	0.6779	1.33e-05	0.000333797	0.00098138	0.0545664	0.370711	0.00139001	0.233552	0.351059	0.000924065	1	0.211938	0.0693683	0.357498
124	Klf6	23849	Kruppel-like factor 6	3	0	0	2407	0.26	0.04738	0.7477	5.19e-06	0.000388186	0.000453555	0.0629457	0.116524	0.072948	0.999548	0.29195	0.000398765	0.0176027	0.368554	0.00106291	0.0224176
125	Tle4	21888	transducin-like enhancer of split 4	3	0	0	3562	0.13	0.1093	0.9563	0.00335803	0.000394481	0.089549	0.0634546	0.127782	0.0733402	0.999548	0.0841643	0.060693	0.471565	0.193165	0.0129101	0.131077
126	Spag9	70834	sperm associated antigen 9	3	0	0	3503	0.13	0.1056	0.9406	0.00371812	0.000400858	0.0965894	0.0638127	0.160696	0.0199289	0.730112	0.101089	0.0737333	0.515957	0.13954	0.0443159	0.278467
127	Irgq	210146	immunity-related GTPase family, Q	3	0	0	2815	0.19	0.06661	0.8268	0.009204	0.000403054	0.184511	0.0638127	0.19831	0.0738677	0.999548	0.171828	0.0558405	0.455985	0.184331	0.0487968	0.294788
128	Asns	27053	asparagine synthetase	3	0	0	2495	-0.21	0.05126	0.7618	4.35e-08	0.000417264	6.12e-06	0.0650382	-0.243276	0.00018558	0.057035	-0.245596	1.13e-05	0.000984816	-0.133599	0.0747258	0.374684
129	Pnrc1	108767	proline-rich nuclear receptor coactivator 1	3	0	0	2512	0.23	0.05204	0.7689	0.000114732	0.000416813	0.00648009	0.0650382	0.256136	0.00659232	0.483917	0.13938	0.0746988	0.516889	0.301768	0.00212641	0.0371786
130	Yars	107271	tyrosyl-tRNA synthetase	3	0	0	3707	-0.11	0.1187	0.9834	0.000148646	0.000429647	0.00794898	0.0664532	-0.126445	0.00190718	0.270526	-0.10455	0.00981972	0.180376	-0.0856753	0.0754578	0.376435
131	B3galt2	26878	UDP-Gal:betaGlcNAc beta 1,3-galactosyltransferase, polypeptide 2	3	0	0	4660	0.1	0.1868	1.041	5.12e-05	0.000461767	0.00320077	0.0702028	0.277168	0.000274699	0.0706807	0.13733	0.0195047	0.272324	-0.119044	0.0772931	0.382853
132	Clu	12759	clusterin	3	0	0	5805	-0.03	0.2808	1.044	0.00144626	0.000464364	0.0479076	0.0702028	-0.154505	0.0334569	0.900598	-0.0675986	0.0774378	0.517838	0.142088	0.00797873	0.0950384
133	Amigo2	105827	adhesion molecule with Ig like domain 2	3	0	0	1978	0.32	0.03055	0.6557	0.00910964	0.000459539	0.182802	0.0702028	0.281687	0.0771686	0.999548	0.322606	0.0405249	1	0.35135	0.0635305	0.3396
134	Chka	12660	choline kinase alpha	3	0	0	2879	-0.16	0.0699	0.8346	0.000235513	0.000470067	0.0116065	0.0705346	-0.185976	0.00871825	0.535882	-0.165826	0.00356027	0.0934254	-0.127008	0.0777535	0.384139
135	Ndrg3	29812	N-myc downstream regulated gene 3	3	0	0	3007	0.17	0.07669	0.8528	0.000382618	0.000504731	0.0167246	0.0751751	0.179475	0.00818808	0.514732	0.18686	0.00653343	0.138142	0.132338	0.0796196	0.388849
136	Slc38a3	76257	solute carrier family 38, member 3	3	0	0	2286	-0.23	0.04229	0.7085	4.66e-13	0.00051128	1.77e-10	0.0755905	-0.118479	0.0799625	0.999548	-0.263618	5.35e-11	1.57e-08	-0.315688	0.000169095	0.00523294
137	Dock3	208869	dedicator of cyto-kinesis 3	3	0	0	4995	0.07	0.2131	1.046	0.000928058	0.000538327	0.0344289	0.0790083	0.201143	0.0068168	0.483917	0.142478	0.0219152	0.286262	-0.137817	0.0813483	0.392641
138	Mmd2	75104	monocyte to macrophage differentiation-associated 2	3	0	0	2830	-0.16	0.06738	0.8266	1.41e-07	0.000544165	1.79e-05	0.0792865	-0.194132	6.39e-05	0.027176	-0.130783	0.000108247	0.00682583	-0.165143	0.0816414	0.393461
139	Olfml1	244198	olfactomedin-like 1	3	0	0	2125	-0.29	0.0359	0.6678	6.96e-07	0.00056598	7.56e-05	0.0818716	-0.318724	0.00505879	0.430542	-0.392976	7.87e-06	0.000758149	-0.143641	0.082718	0.396111
140	Tmem229b	268567	transmembrane protein 229B	3	0	0	3502	-0.12	0.1056	0.965	0.000533591	0.000575063	0.0219581	0.0825913	-0.113454	0.0261634	0.815415	-0.0748072	0.0831582	0.533701	-0.175952	0.00289651	0.0467428
141	Prkar1b	19085	protein kinase, cAMP dependent regulatory, type I beta	3	0	0	2938	-0.17	0.07301	0.8432	2.27e-09	0.000580707	4e-07	0.0828105	-0.067653	0.0834294	0.999548	-0.145376	9.79e-05	0.00625246	-0.295892	7.74e-07	6.28e-05
142	Gpr37l1	171469	G protein-coupled receptor 37-like 1	3	0	0	2395	-0.23	0.04687	0.7369	1.8e-05	0.000610338	0.00128687	0.0864229	-0.278705	0.0256171	0.808617	-0.280221	5.78e-05	0.00395214	-0.125144	0.0848249	0.401834
143	Aldh1l1	107747	aldehyde dehydrogenase 1 family, member L1	3	0	0	2075	-0.26	0.03403	0.658	0.000535111	0.000622715	0.0219581	0.086952	-0.220747	0.0853945	0.999548	-0.193924	0.0843696	1	-0.35623	0.000877643	0.0193066
144	Chn2	69993	chimerin 2	3	0	0	5086	0.09	0.2205	1.044	0.00196481	0.000622723	0.0608729	0.086952	-0.181207	0.0853948	0.999548	0.172898	0.0608692	0.471565	0.26257	0.00575563	0.0762748
145	Pitpnm3	327958	PITPNM family member 3	3	0	0	3801	-0.13	0.1248	0.9882	0.000455263	0.000651558	0.0191907	0.0897321	0.309083	0.0866931	0.999548	-0.295922	0.0821035	1	-0.388531	0.000734193	0.0168986
146	Dctn2	69654	dynactin 2	3	0	0	7024	-0.02	0.3893	1.103	0.0135364	0.000647959	0.243572	0.0897321	0.0792654	0.0587286	0.999548	-0.0713861	0.0865332	0.54202	-0.0776131	0.0646761	0.343525
147	Appl2	216190	adaptor protein, phosphotyrosine interaction, PH domain and leucine zipper containing 2	3	0	0	4209	-0.11	0.1531	1.012	0.00568297	0.000656561	0.131796	0.089806	-0.285127	0.0332211	0.900598	-0.176748	0.0381026	0.380896	0.136468	0.0869144	0.407496
148	Nxn	18230	nucleoredoxin	3	0	0	1658	-0.36	0.02041	0.574	0.000628497	0.000667107	0.0248275	0.0906319	-0.282723	0.0873773	0.999548	-0.36813	0.0155977	1	-0.44228	0.00561163	0.0750233
149	Thra	21833	thyroid hormone receptor alpha	3	0	0	2463	0.25	0.04983	0.7602	0	0.000679899	0	0.0917498	0.284439	0.000779197	0.153947	0.355024	1.71e-17	1.44e-14	0.110953	0.0879322	0.409214
150	Cars	27267	cysteinyl-tRNA synthetase	3	0	0	5696	-0.04	0.2715	1.041	0.00275794	0.000717092	0.0778847	0.0961238	-0.13482	0.00655938	0.483917	-0.0812417	0.0769376	0.517838	0.101076	0.0895073	0.412845
151	Sidt1	320007	SID1 transmembrane family, member 1	3	0	0	2745	0.2	0.06312	0.8183	0.00268954	0.00074732	0.0765985	0.0995124	0.302008	0.00552875	0.451047	0.157602	0.0907477	1	0.148186	0.0873163	0.407496
152	Slc25a22	68267	solute carrier family 25 (mitochondrial carrier, glutamate), member 22	3	0	0	3959	-0.11	0.1355	1	0.000401163	0.000755271	0.0173466	0.0999094	0.332717	0.0910684	0.999548	-0.389745	0.0594567	0.465107	-0.268524	0.000831634	0.0184854
153	mt-Nd2	17717	mitochondrially encoded NADH dehydrogenase 2	3	0	0	2425	0.24	0.04818	0.7515	5.31e-07	0.000773178	5.9e-05	0.10161	0.174333	0.0917825	0.999548	0.222798	5.69e-05	0.00393613	0.312858	0.000467501	0.0119503
154	Gpc4	14735	glypican 4	3	0	0	2899	-0.16	0.07093	0.8385	0.00092348	0.000779741	0.0343224	0.101807	-0.130063	0.0920414	0.999548	-0.123397	0.0557404	0.455985	-0.214903	0.00235484	0.0403989
155	Slc7a8	50934	solute carrier family 7 (cationic amino acid transporter, y+ system), member 8	3	0	0	2664	0.21	0.05915	0.8113	9.91e-05	0.000796892	0.00569158	0.103375	0.244604	0.0320313	0.900598	0.129353	0.0927114	0.553941	0.262627	0.000297643	0.00843499
156	Retsat	67442	retinol saturase (all trans retinol 13,14 reductase)	3	0	0	5226	0.06	0.2319	1.051	0.0106412	0.000818054	0.205142	0.10544	0.212698	0.0935249	0.999548	-0.207906	0.0345753	1	0.168495	0.0747939	0.374732
157	Ift57	73916	intraflagellar transport 57	3	0	0	3226	0.15	0.089	0.8948	0.0122806	0.000831369	0.226954	0.106473	0.137316	0.0541771	0.999548	0.163049	0.056971	0.457531	0.148622	0.0940296	0.422917
158	Carhsp1	52502	calcium regulated heat stable protein 1	3	0	0	8368	0.05	0.5109	1.103	2.39e-05	0.000851019	0.00163696	0.1083	-0.0865842	0.0947647	0.999548	-0.0993818	0.0865352	0.54202	0.345155	2.11e-05	0.000992124
159	Far2	330450	fatty acyl CoA reductase 2	3	0	0	2724	0.21	0.06204	0.8175	0.000387073	0.000874588	0.0168461	0.1106	0.139658	0.0956315	0.999548	0.298971	0.000763501	0.0293324	0.176147	0.0591342	0.326515
160	Ret	19713	ret proto-oncogene	3	33.3333	0	1049	0.64	0.006928	0.3553	1.33e-15	0.000907366	6.87e-13	0.114028	0.342168	0.0968116	0.999548	0.360396	0.0251803	1	1.21904	6.38e-16	3.13e-13
161	Ddx54	71990	DEAD (Asp-Glu-Ala-Asp) box polypeptide 54	3	0	0	2730	-0.18	0.06237	0.8096	0.000794383	0.000919014	0.0304822	0.114066	-0.232782	0.00210331	0.286265	-0.122572	0.0972241	0.564212	-0.176957	0.0493828	0.29669
162	Gpm6b	14758	glycoprotein m6b	3	0	0	6965	-0.02	0.3839	1.099	0.0166555	0.000919017	0.282609	0.114066	-0.0614489	0.0972242	0.999548	-0.0547043	0.0538688	0.449136	0.0684545	0.0819315	0.394562
163	Psmd2	21762	proteasome (prosome, macropain) 26S subunit, non-ATPase, 2	3	0	0	4324	-0.08	0.1614	1.018	5.26e-05	0.000934503	0.00325344	0.115276	-0.0544352	0.0977673	0.999548	-0.0934461	0.00075537	0.0293324	-0.101599	0.00577848	0.0762748
164	Bhlhe40	20893	basic helix-loop-helix family, member e40	3	0	0	1897	-0.29	0.02779	0.6195	0.000270693	0.000959615	0.0130268	0.116235	-0.279392	0.0435613	0.956359	-0.248468	0.0986353	1	-0.344113	0.000660848	0.0155836
165	Xpnpep1	170750	X-prolyl aminopeptidase (aminopeptidase P) 1, soluble	3	0	0	3798	-0.1	0.1246	0.9882	0.000348489	0.000948826	0.0156199	0.116235	-0.0848012	0.0459177	0.962143	-0.135815	0.000845925	0.0307281	-0.0876994	0.0982643	0.431747
166	Filip1l	78749	filamin A interacting protein 1-like	3	0	0	838.5	0.66	0.004008	0.2789	0.00954988	0.000956463	0.189743	0.116235	0.765467	0.0985272	1	0.598139	0.0708056	1	0.615154	0.0302282	0.223451
167	Agap3	213990	ArfGAP with GTPase domain, ankyrin repeat and PH domain 3	3	0	0	4198	-0.09	0.1523	1.013	0.00814088	0.000966055	0.171095	0.116314	-0.0721387	0.0769267	0.999548	-0.0592215	0.0988554	0.569679	-0.142268	0.0226753	0.191296
168	Lrp12	239393	low density lipoprotein-related protein 12	3	0	0	3476	0.13	0.104	0.9391	0.00796789	0.000977917	0.168288	0.117042	0.127358	0.0418182	0.95167	0.114444	0.0992584	0.569809	0.164187	0.0404364	0.262611
169	Tmem18	211986	transmembrane protein 18	3	0	0	3124	-0.14	0.08317	0.8895	0.00265998	0.0010173	0.0761884	0.121035	-0.161416	0.0332051	0.900598	-0.0988594	0.100573	0.573156	-0.163354	0.0129425	0.131077
170	Nkiras1	69721	NFKB inhibitor interacting Ras-like protein 1	3	0	0	4585	-0.09	0.181	1.023	8.98e-06	0.00103755	0.000728399	0.122717	0.185174	0.101236	0.999548	-0.149465	0.0277567	0.333709	-0.305902	2.04e-05	0.000965889
171	Apoe	11816	apolipoprotein E	3	0	0	3163	-0.14	0.08539	0.899	2.83e-06	0.0010589	0.000263996	0.124511	-0.10098	0.101926	0.999548	-0.187623	8.2e-06	0.000777513	-0.133801	0.0187841	0.16824
172	Nkd2	72293	naked cuticle 2	3	0	0	1815	0.37	0.02514	0.601	0.00209144	0.00110332	0.0637162	0.12898	0.278963	0.00477398	0.413143	0.320112	0.103332	1	0.514212	0.0654128	0.344902
173	Cbln4	228942	cerebellin 4 precursor protein	3	0	0	930.4	-0.6	0.005173	0.3676	3.18e-08	0.00113331	4.63e-06	0.130963	-0.395254	0.10426	0.999548	-0.600899	8.82e-05	1	-0.801795	1.21e-05	0.000629144
174	Spry1	24063	sprouty RTK signaling antagonist 1	3	0	0	2394	0.26	0.04682	0.7436	0.000434472	0.00112976	0.018574	0.130963	0.166357	0.0897185	0.999548	0.403795	0.000529305	1	0.209811	0.104151	0.445648
175	Epas1	13819	endothelial PAS domain protein 1	3	0	0	2603	-0.18	0.05623	0.7868	8.95e-12	0.00119168	2.61e-09	0.136921	-0.138396	0.10602	0.999548	-0.219208	5.21e-09	1.22e-06	-0.191481	3.02e-05	0.00132368
176	Fkbp4	14228	FK506 binding protein 4	3	0	0	3940	-0.1	0.1342	0.9993	0.00130201	0.00121564	0.0440732	0.13888	-0.100306	0.0243587	0.794999	-0.068926	0.106726	0.595758	-0.128008	0.0070086	0.0874774
177	Foxp1	108655	forkhead box P1	3	0	0	2629	0.21	0.05747	0.8052	0.0026728	0.00128741	0.0763381	0.146248	0.192602	0.0565826	0.999548	0.242076	0.00706313	0.144659	0.18429	0.108786	0.455567
178	Sod3	20657	superoxide dismutase 3, extracellular	3	0	0	1303	-0.45	0.01163	0.4679	9.58e-07	0.00129688	9.92e-05	0.146497	-0.488478	0.109052	1	-0.289784	0.0737537	1	-0.567865	5.83e-07	5e-05
179	Slc1a3	20512	solute carrier family 1 (glial high affinity glutamate transporter), member 3	3	0	0	3570	-0.11	0.1098	0.9758	1.46e-10	0.00130911	3.38e-08	0.147052	-0.119185	0.00397304	0.387406	-0.161412	7.61e-10	2.03e-07	-0.0616897	0.109394	0.457065
180	Aars	234734	alanyl-tRNA synthetase	3	0	0	4272	-0.08	0.1577	1.019	0.000141888	0.00134421	0.00762821	0.149444	-0.0941478	0.012121	0.605197	-0.0853571	0.00100095	0.035658	-0.0658826	0.110363	0.459121
181	Cecr2	330409	CECR2, histone acetyl-lysine reader	3	0	0	1144	0.52	0.008522	0.3833	0.00787351	0.00134527	0.166821	0.149444	0.617199	0.0397949	1	0.593128	0.0376391	1	0.356197	0.110392	0.459121
182	Csrp2	13008	cysteine and glycine-rich protein 2	3	0	0	2117	0.29	0.03561	0.6826	0.000947561	0.0013965	0.0350232	0.15344	0.227737	0.0277857	0.844564	0.350664	0.00401123	1	0.301303	0.111776	0.462033
183	Ehd1	13660	EH-domain containing 1	3	0	0	3654	-0.11	0.1152	0.9837	0.00633808	0.00138946	0.141915	0.15344	-0.0870761	0.111587	0.999548	-0.0921009	0.0404454	0.392956	-0.15814	0.0279248	0.215654
184	Slc43a2	215113	solute carrier family 43, member 2	3	0	0	3097	-0.14	0.08164	0.8826	8.57e-05	0.00140739	0.00499615	0.153734	-0.0991072	0.112065	0.999548	-0.129973	0.00659784	0.138508	-0.203827	0.00101177	0.0215523
185	Etv1	14009	ets variant 1	3	0	0	3738	0.12	0.1207	0.9791	0.00375331	0.00141448	0.0968778	0.153734	0.174799	0.00699807	0.483917	0.0890655	0.112253	0.607584	0.0959833	0.0838609	0.399786
186	Wdr3	269470	WD repeat domain 3	3	0	0	4597	0.13	0.1819	1.038	0.000289139	0.00146008	0.0135518	0.156993	-0.146377	0.113447	0.999548	0.193421	0.105415	1	0.348861	0.00025646	0.0074836
187	Sec24d	69608	Sec24 related gene family, member D (S. cerevisiae)	3	0	0	2494	0.23	0.0512	0.7689	0.0195195	0.00145805	0.314748	0.156993	0.280957	0.0461496	0.962143	0.173071	0.113394	1	0.227784	0.100713	0.437309
188	Gabra4	14397	gamma-aminobutyric acid (GABA) A receptor, subunit alpha 4	3	0	0	5138	0.07	0.2247	1.042	0.0109442	0.00147833	0.209577	0.15811	0.13408	0.104873	0.999548	0.170396	0.020979	0.278363	-0.0911932	0.113917	0.466815
189	Klhdc9	68874	kelch domain containing 9	3	0	0	881.2	-0.65	0.004528	0.3529	0.0193473	0.00150538	0.314484	0.160152	-0.57049	0.097853	1	-0.759616	0.046457	1	-0.618212	0.114608	0.468438
190	Kctd13	233877	potassium channel tetramerisation domain containing 13	3	0	0	1060	0.61	0.007103	0.3598	0	0.00155065	0	0.1641	0.237713	0.115746	0.999548	0.624719	6.02e-08	1.14e-05	0.959129	2.46e-22	4.33e-19
191	Crat	12908	carnitine acetyltransferase	3	0	0	6191	-0.03	0.3146	1.049	0.0237979	0.00156635	0.353766	0.164893	0.138492	0.116135	0.999548	-0.112133	0.104186	0.584913	-0.113545	0.0564253	0.318674
192	Ctxn1	330695	cortexin 1	3	0	0	9496	0	0.6092	1.044	0.00601253	0.00159325	0.135989	0.166851	0.0760208	0.051876	0.998227	0.0657205	0.116796	0.61593	-0.141366	0.0194775	0.172876
193	Ghitm	66092	growth hormone inducible transmembrane protein	3	0	0	4616	-0.07	0.1834	1.026	0.00817256	0.00163295	0.17153	0.170123	-0.0800823	0.0496207	0.979338	-0.0668929	0.029655	0.339892	-0.0645411	0.117758	0.475389
194	Zfp622	52521	zinc finger protein 622	3	0	0	6829	0.03	0.3716	1.088	0.0102083	0.00166404	0.199088	0.172469	0.0712122	0.118501	0.999548	-0.0740475	0.0980082	0.566524	0.107393	0.0197562	0.174622
195	Chodl	246048	chondrolectin	3	0	0	1156	-0.54	0.008742	0.4215	2.27e-05	0.0017183	0.00157463	0.176274	-0.484041	0.0018092	0.269733	-0.636314	0.000755642	1	-0.490033	0.119775	0.479436
196	Gabrg2	14406	gamma-aminobutyric acid (GABA) A receptor, subunit gamma 2	3	0	0	3656	0.12	0.1153	0.9696	0.016037	0.00171649	0.274249	0.176274	0.104454	0.119733	0.999548	0.115246	0.0676501	0.492748	0.155229	0.0504517	0.300617
197	Snx10	71982	sorting nexin 10	3	0	0	3522	-0.12	0.1068	0.9676	2.13e-05	0.00176215	0.00149542	0.178947	-0.0678822	0.120785	0.999548	-0.151227	0.00030338	0.0147378	-0.14287	0.00414818	0.0605918
198	Rbp4	19662	retinol binding protein 4, plasma	3	0	0	1206	0.58	0.00967	0.4017	4.34e-05	0.00175891	0.00275974	0.178947	0.446391	0.0187509	0.717663	0.442784	0.120711	1	0.850825	0.00015123	0.00478432
199	Anxa6	11749	annexin A6	3	0	0	3392	-0.12	0.09879	0.945	0.0235109	0.00181406	0.35095	0.183293	-0.127812	0.119806	0.999548	-0.140297	0.0459874	0.4171	-0.0988838	0.12196	0.484125
200	Vcam1	22329	vascular cell adhesion molecule 1	3	0	0	2185	-0.26	0.03821	0.6823	6.22e-15	0.00184376	2.84e-12	0.185363	-0.120972	0.122622	0.999548	-0.341942	4.36e-12	1.71e-09	-0.304961	1.42e-05	0.000714924
201	Tcf4	21413	transcription factor 4	3	0	0	4501	0.08	0.1746	1.036	0.00293698	0.00186185	0.081566	0.18625	0.0750545	0.123022	0.999548	0.0870352	0.00986874	0.180712	0.0889797	0.0401756	0.261715
202	Tmem250-ps	109299	transmembrane protein 250, pseudogene	3	0	0	2820	-0.17	0.06688	0.824	0.000443045	0.00188067	0.0188336	0.187201	-0.123995	0.0866289	0.999548	-0.121126	0.123435	0.628182	-0.255884	0.000473305	0.0120504
203	Rnf152	320311	ring finger protein 152	3	0	0	1780	0.38	0.02406	0.5877	0.00219586	0.00192833	0.0662536	0.191	0.409093	0.00259412	0.306979	0.290956	0.124469	1	0.438642	0.10602	0.45003
204	Pdha1	18597	pyruvate dehydrogenase E1 alpha 1	3	0	0	4653	-0.07	0.1862	1.026	0.000438636	0.00195397	0.0186857	0.192591	-0.0469256	0.125018	0.999548	-0.0539895	0.0657907	0.489814	-0.123335	0.000608121	0.0146373
205	Il17rc	171095	interleukin 17 receptor C	3	0	0	1007	-0.56	0.006268	0.3902	0.000545146	0.00198505	0.0221888	0.194699	-0.707197	0.024012	1	-0.681641	0.0021418	1	-0.292935	0.125677	0.48938
206	Entpd2	12496	ectonucleoside triphosphate diphosphohydrolase 2	3	0	0	1995	-0.27	0.03117	0.6396	0.0136979	0.00201195	0.245695	0.195577	-0.268361	0.0985383	0.999548	-0.251566	0.0268264	0.327148	-0.286793	0.126243	0.490265
207	Tbpl1	237336	TATA box binding protein-like 1	3	0	0	3515	0.13	0.1064	0.9433	0.021362	0.00201345	0.330151	0.195577	0.127739	0.102547	0.999548	0.117919	0.126274	0.635354	0.150177	0.0457758	0.284706
208	Nkpd1	69547	NTPase, KAP family P-loop domain containing 1	3	0	0	2075	0.28	0.03403	0.6775	0.01939	0.00203956	0.314748	0.197161	-0.957192	0.126817	1	0.826979	0.124732	1	0.966325	0.0330314	0.234802
209	Pacs2	217893	phosphofurin acidic cluster sorting protein 2	3	0	0	3463	-0.12	0.1031	0.9594	0.00897851	0.00209868	0.181804	0.201905	-0.121556	0.0742103	0.999548	-0.126377	0.0205315	0.276483	-0.106987	0.128031	0.49437
210	Rcor2	104383	REST corepressor 2	3	0	0	324.6	1.27	0.0003251	0.1054	0.00379377	0.0021815	0.0976714	0.208873	0.175197	0.129694	0.999548	0.246417	0.00735813	0.145626	3.39061	0.0699481	0.359196
211	Psmb9	16912	proteasome (prosome, macropain) subunit, beta type 9 (large multifunctional peptidase 2)	3	0	0	1672	-0.36	0.02082	0.5757	0.0326157	0.00220187	0.43546	0.209825	-0.364202	0.105331	0.999548	-0.406687	0.0755871	1	-0.323491	0.130096	0.499177
212	Spryd3	223918	SPRY domain containing 3	3	0	0	2767	-0.19	0.06421	0.813	5.82e-11	0.0022289	1.38e-08	0.211089	-0.0705634	0.130626	0.999548	-0.16975	2.86e-05	0.00213999	-0.317371	3.29e-08	4.25e-06
213	Nubp2	26426	nucleotide binding protein 2	3	0	0	3580	-0.11	0.1104	0.9778	0.0505635	0.00223613	0.558003	0.211089	-0.111713	0.130767	0.999548	-0.109903	0.117255	0.61593	-0.118501	0.122124	0.484125
214	Opcml	330908	opioid binding protein/cell adhesion molecule-like	3	0	0	4053	0.1	0.142	1.002	0.014845	0.00224713	0.258655	0.211135	0.102256	0.073586	0.999548	0.10532	0.0383866	0.381612	0.0981257	0.130981	0.500923
215	Slc7a3	11989	solute carrier family 7 (cationic amino acid transporter, y+ system), member 3	3	0	0	5346	-0.04	0.2419	1.037	0.0211981	0.00227013	0.329248	0.212305	-0.139966	0.0677488	0.999548	-0.115605	0.0659054	0.489814	0.137833	0.131427	0.501872
216	Hfm1	330149	HFM1, ATP-dependent DNA helicase homolog	3	0	0	1034	0.59	0.006682	0.3508	0.00084277	0.00229358	0.0319126	0.213505	1.33098	0.0152092	1	1.70845	0.0054016	1	-1.27782	0.131878	1
217	Nek6	59126	NIMA (never in mitosis gene a)-related expressed kinase 6	3	0	0	6055	-0.01	0.3026	1.045	0.0102482	0.002309	0.199479	0.21395	-0.0991364	0.132173	0.999548	-0.0929974	0.0472424	0.42331	0.14763	0.0369284	0.25063
218	Rala	56044	v-ral simian leukemia viral oncogene A (ras related)	3	0	0	2743	0.22	0.06297	0.818	2.73e-08	0.00237578	4.06e-06	0.218151	0.0918904	0.133435	0.999548	0.196396	0.000775248	0.0295903	0.373207	9.07e-07	7.24e-05
219	Junb	16477	jun B proto-oncogene	3	0	0	2781	0.35	0.06491	0.8223	7.84e-08	0.00237604	1.05e-05	0.218151	-0.232907	0.13344	0.999548	0.515639	0.00516784	1	0.764866	4.31e-07	3.89e-05
220	Tmem123	71929	transmembrane protein 123	3	0	0	3782	0.19	0.1236	0.9806	0.0153644	0.00241575	0.265862	0.220788	-0.294741	0.0902393	0.999548	0.482633	0.0319383	1	0.390618	0.134179	0.505808
221	Atp1b1	11931	ATPase, Na+/K+ transporting, beta 1 polypeptide	3	0	0	4831	0.07	0.2001	1.046	0.00038016	0.00243619	0.0166572	0.221001	0.0726923	0.0094988	0.55313	0.0736895	0.00330737	0.0887703	0.0701203	0.134556	0.506408
222	Pcdh11x	245578	protocadherin 11 X-linked	3	0	0	2872	0.18	0.06952	0.8351	0.0250018	0.00244006	0.365609	0.221001	0.15033	0.0608568	0.999548	0.192343	0.0889114	0.548097	0.196219	0.134627	0.506413
223	Ramp2	54409	receptor (calcitonin) activity modifying protein 2	3	0	0	2354	0.26	0.04511	0.7297	0.00191131	0.0024627	0.0595824	0.22106	0.139337	0.135043	0.999548	0.332982	0.00567403	1	0.316755	0.0377616	0.253084
224	Trim36	28105	tripartite motif-containing 36	3	0	0	1924	0.35	0.0287	0.6328	0.0141567	0.00246216	0.251096	0.22106	0.219993	0.135033	0.999548	0.337145	0.0425656	1	0.480871	0.060564	0.331276
225	Nsmf	56876	NMDA receptor synaptonuclear signaling and neuronal migration factor	3	0	0	5629	0.01	0.2657	1.058	2.64e-08	0.00251413	3.97e-06	0.224674	0.127034	0.135976	0.999548	0.146802	0.000128905	0.00789276	-0.243497	5.18e-06	0.000307797
226	Fbxw7	50754	F-box and WD-40 domain protein 7	3	0	0	2579	0.21	0.05513	0.7923	0.00339466	0.0025646	0.0899295	0.22817	0.187756	0.13688	0.999548	0.19032	0.0198516	0.274915	0.26243	0.0214314	0.183835
227	Pigq	14755	phosphatidylinositol glycan anchor biosynthesis, class Q	3	0	0	3990	-0.1	0.1377	1.002	0.00456016	0.00261942	0.111276	0.232021	-0.0732171	0.137848	0.999548	-0.0865726	0.0773474	0.517838	-0.130669	0.00785445	0.094084
228	Nars	70223	asparaginyl-tRNA synthetase	3	0	0	3410	-0.12	0.09992	0.9481	3.6e-08	0.00264496	5.1e-06	0.232142	-0.161418	7.09e-05	0.0290581	-0.136551	1.3e-05	0.00110342	-0.0703285	0.138295	0.514263
229	Stom	13830	stomatin	3	0	0	2481	-0.22	0.05063	0.7569	0.00130679	0.00264715	0.0441607	0.232142	-0.195747	0.110844	0.999548	-0.334167	0.00119351	0.0403188	-0.12589	0.138333	0.514263
230	Taok3	330177	TAO kinase 3	3	0	0	2953	0.17	0.07382	0.8486	0.0510083	0.00265543	0.561504	0.232142	0.197671	0.120459	0.999548	0.158527	0.138477	1	0.159953	0.113612	0.466243
231	1700094D03Rik	73545	RIKEN cDNA 1700094D03 gene	3	0	0	320.6	1.3	0.000314	0.1052	0.0233158	0.00268353	0.349598	0.233584	1.41018	0.0890842	1	1.26415	0.138964	1	1.23406	0.0536893	1
232	Scoc	56367	short coiled-coil protein	3	0	0	4566	0.08	0.1796	1.036	0.00803513	0.00273424	0.169353	0.236972	0.062795	0.0903305	0.999548	0.0933779	0.013429	0.219877	0.0912274	0.139834	0.518184
233	Rasl10b	276952	RAS-like, family 10, member B	3	0	0	2834	-0.17	0.06761	0.8279	0.00166152	0.00274821	0.0533678	0.23716	-0.126825	0.140072	0.999548	-0.111482	0.0552766	0.45534	-0.263082	0.0031554	0.0496665
234	Mef2c	17260	myocyte enhancer factor 2C	3	0	0	3751	-0.11	0.1215	0.989	0.000990644	0.00276674	0.0360849	0.237739	-0.0931564	0.0090972	0.547019	-0.0693053	0.140386	0.652838	-0.165294	0.0102863	0.112559
235	Cyp4v3	102294	cytochrome P450, family 4, subfamily v, polypeptide 3	3	0	0	3036	-0.18	0.07829	0.8673	0.000339746	0.00277949	0.0153512	0.237818	0.381177	0.140601	0.999548	-0.603534	0.00219068	1	-0.326211	0.0120281	0.125157
236	Gm49342		predicted gene, 49342	3	0	0	2343	-0.21	0.04462	0.7195	0.00380445	0.00280197	0.0976961	0.238726	-0.182111	0.1109	0.999548	-0.154998	0.140979	1	-0.306805	0.00428427	0.0620532
237	Dennd2c	329727	DENN/MADD domain containing 2C	3	0	0	685.9	0.89	0.002428	0.2405	0.0200269	0.00281508	0.320097	0.238831	0.487278	0.141199	1	1.19239	0.0405223	1	0.975404	0.0952395	1
238	Sh3gl2	20404	SH3-domain GRB2-like 2	3	0	0	5914	-0.06	0.2903	1.042	0.00979501	0.00289585	0.193466	0.24465	0.0663316	0.142536	0.999548	-0.0763434	0.130377	0.639695	-0.167713	0.0117174	0.122678
239	Ppp2r1a	51792	protein phosphatase 2, regulatory subunit A, alpha	3	0	0	2873	-0.18	0.06958	0.8328	0	0.00295949	0	0.247026	-0.0442921	0.143573	0.999548	-0.218903	3.86e-24	5.68e-21	-0.283453	7.58e-15	3.13e-12
240	Synj2	20975	synaptojanin 2	3	0	0	2817	0.25	0.06671	0.8265	0.00428917	0.00295197	0.106341	0.247026	0.454366	0.0175463	0.714103	0.602363	0.0308477	1	-0.311112	0.143451	0.524599
241	Col26a1	140709	collagen, type XXVI, alpha 1	3	0	0	1263	0.57	0.0108	0.4251	0.0109876	0.00296082	0.209726	0.247026	0.263676	0.0601093	0.999548	0.509565	0.0291839	1	0.930149	0.143594	1
242	Armcx3	71703	armadillo repeat containing, X-linked 3	3	0	0	3256	0.16	0.09072	0.9026	0.00046773	0.00299377	0.0196339	0.248743	0.132043	0.0366961	0.925828	0.0933784	0.144125	0.660817	0.261573	0.00102005	0.0216206
243	Grb10	14783	growth factor receptor bound protein 10	3	0	0	4291	-0.12	0.1591	1.02	0.00550678	0.0030696	0.129351	0.253993	0.129862	0.145332	0.999548	-0.213917	0.0137109	0.220834	-0.277196	0.0530927	0.309524
244	Zcchc9	69085	zinc finger, CCHC domain containing 9	3	0	0	4520	-0.09	0.1761	1.022	0.0211838	0.00308442	0.329248	0.254174	-0.185771	0.119374	0.999548	0.190833	0.145565	1	-0.262391	0.033741	0.237731
245	C1ql1	23829	complement component 1, q subcomponent-like 1	3	0	0	1857	0.34	0.02647	0.6146	3.46e-08	0.00309894	4.94e-06	0.254328	0.146388	0.145793	0.999548	0.258395	0.00403393	0.0992115	0.60405	2.07e-07	2.12e-05
246	Ddr1	12305	discoidin domain receptor family, member 1	3	0	0	4600	0.17	0.1821	1.038	2.46e-10	0.00321172	5.49e-08	0.261879	-0.0997425	0.147541	0.999548	0.128138	0.0225703	0.292221	0.493095	1.73e-10	3.75e-08
247	Ampd2	109674	adenosine monophosphate deaminase 2	3	0	0	3425	-0.12	0.1008	0.9523	0.00090878	0.00323058	0.0338386	0.261879	-0.137608	0.00259616	0.306979	-0.0806887	0.147829	0.666733	-0.152373	0.0308827	0.226223
248	Zc3h12c	244871	zinc finger CCCH type containing 12C	3	0	0	1824	0.36	0.02544	0.6024	0.0117749	0.00324304	0.220634	0.261879	0.408497	0.0190495	0.718728	0.302795	0.148019	1	0.381042	0.0975554	0.429802
249	Ccdc32	269336	coiled-coil domain containing 32	3	0	0	3618	-0.11	0.1128	0.981	0.0123797	0.00322595	0.228157	0.261879	-0.0942907	0.147759	0.999548	-0.101243	0.0826415	0.533208	-0.142935	0.0240125	0.198515
250	Atp2a3	53313	ATPase, Ca++ transporting, ubiquitous	3	0	0	40.61	-2.53	5.7e-07	0.005728	0.0240024	0.00326042	0.355523	0.262229	-3.25613	0.0390851	1	-2.27322	0.11913	1	-2.06152	0.148283	1
251	Oxct1	67041	3-oxoacid CoA transferase 1	3	0	0	4200	0.1	0.1525	1.015	0.00329396	0.00332869	0.0879571	0.266653	0.0700736	0.149311	0.999548	0.0842877	0.0532244	0.447572	0.150456	0.00706244	0.0876177
252	Slc27a1	26457	solute carrier family 27 (fatty acid transporter), member 1	3	0	0	3448	-0.12	0.1022	0.9572	0.000131605	0.00337554	0.00715183	0.269333	-0.108369	0.150008	0.999548	-0.0777034	0.0503294	0.439578	-0.187399	0.000162551	0.00509208
253	Slc16a1	20501	solute carrier family 16 (monocarboxylic acid transporters), member 1	3	0	0	2890	0.22	0.07049	0.8362	2.58e-07	0.00339318	3.09e-05	0.269671	0.0966759	0.150269	0.999548	0.130843	0.0459736	0.4171	0.427138	1.59e-07	1.67e-05
254	Atp2b4	381290	ATPase, Ca++ transporting, plasma membrane 4	3	0	0	2431	-0.2	0.04842	0.7409	0.000572884	0.00346969	0.0231128	0.274666	-0.16504	0.15139	0.999548	-0.166427	0.0202681	0.276383	-0.268796	0.00223372	0.038737
255	Mfsd13a	75146	major facilitator superfamily domain containing 13a	3	0	0	4393	-0.11	0.1665	1.022	0.000446127	0.0035197	0.0189246	0.277521	-0.172322	0.152114	0.999548	0.161325	0.130021	1	-0.303853	0.000257991	0.00751113
256	Kcnk1	16525	potassium channel, subfamily K, member 1	3	0	0	2706	-0.17	0.06118	0.8083	0.0014613	0.00353336	0.048247	0.277521	-0.128359	0.15231	0.999548	-0.138313	0.12197	0.625467	-0.258101	0.00112667	0.0232257
257	Atp2b3	320707	ATPase, Ca++ transporting, plasma membrane 3	3	0	0	4286	-0.11	0.1587	1.02	0.00116776	0.00358148	0.041121	0.278423	0.162708	0.152999	0.999548	-0.248879	0.0100946	0.182572	-0.254522	0.0103543	0.11311
258	Lrfn2	70530	leucine rich repeat and fibronectin type III domain containing 2	3	0	0	4894	-0.09	0.2051	1.031	0.00486365	0.0035864	0.117682	0.278423	-0.112928	0.141831	0.999548	0.107179	0.153069	0.673919	-0.267716	0.00417749	0.0608808
259	Ppp2ca	19052	protein phosphatase 2 (formerly 2A), catalytic subunit, alpha isoform	3	0	0	5780	0.16	0.2787	1.057	0.01567	0.00356465	0.269526	0.278423	0.882949	0.0456296	0.959782	-0.181595	0.152759	0.67344	-0.231578	0.0569051	0.320244
260	Calb2	12308	calbindin 2	3	0	0	2282	-0.23	0.0421	0.7065	2.71e-05	0.00360773	0.00181895	0.278932	-0.14988	0.153372	0.999548	-0.296444	1.72e-05	0.00140321	-0.232332	0.0760636	0.378423
261	Ptk2	14083	PTK2 protein tyrosine kinase 2	3	0	0	3965	-0.1	0.1359	1	0.0408917	0.00362069	0.496797	0.278932	-0.108037	0.10348	0.999548	-0.0849294	0.0882947	0.545737	-0.0923157	0.153555	0.546377
262	Bcas1	76960	breast carcinoma amplified sequence 1	3	0	0	3119	0.31	0.08287	0.8715	0.00046367	0.00368392	0.0195042	0.282356	-0.139146	0.154444	0.999548	0.250858	0.000804867	0.030327	0.804788	0.042956	0.273009
263	Lrguk	74354	leucine-rich repeats and guanylate kinase domain containing	3	0	0	278	1.42	0.0002098	0.09586	0.0208061	0.00369323	0.325998	0.282356	1.42785	0.154574	1	1.23744	0.101872	1	1.5988	0.0363701	1
264	Itih3	16426	inter-alpha trypsin inhibitor, heavy chain 3	3	0	0	1195	-0.5	0.009459	0.4403	0.000643144	0.0037194	0.0253563	0.28328	-0.709361	0.00256929	0.306979	-0.355428	0.154938	1	-0.43432	0.0197437	0.174622
265	Mt2	17750	metallothionein 2	3	0	0	2327	-0.25	0.04397	0.7181	1.02e-05	0.00374742	0.000797343	0.28329	-0.148761	0.155326	0.999548	-0.427686	3.31e-06	0.000395584	-0.169498	0.12841	0.495382
266	Ebna1bp2	69072	EBNA1 binding protein 2	3	0	0	2082	0.49	0.03432	0.6792	0.00497145	0.00374771	0.119571	0.28329	0.712121	0.0069851	0.483917	-0.16637	0.15533	0.678833	0.938851	0.0858883	0.404657
267	Plekhg4	102075	pleckstrin homology domain containing, family G (with RhoGef domain) member 4	3	0	0	588.9	0.55	0.00164	0.2156	0.0336378	0.00376886	0.441386	0.283822	2.07394	0.0609567	1	1.95965	0.113779	1	-2.39085	0.155622	1
268	Suco	226551	SUN domain containing ossification factor	3	0	0	5985	0.04	0.2965	1.059	0.030029	0.00380722	0.412427	0.285641	-0.159464	0.103187	0.999548	0.143871	0.156148	0.679288	0.146771	0.0575926	0.322564
269	Trp53i11	277414	transformation related protein 53 inducible protein 11	3	0	0	2716	-0.2	0.06168	0.8063	2.88e-07	0.00395452	3.43e-05	0.295589	-0.119146	0.126148	0.999548	-0.0906082	0.158136	0.681156	-0.39532	6.23e-08	7.25e-06
270	Chrm2	243764	cholinergic receptor, muscarinic 2, cardiac	3	0	0	959.8	0.66	0.005581	0.3215	0.00383728	0.00399672	0.0982881	0.297637	0.426299	0.158697	1	0.635032	0.0810678	1	0.913042	0.00526182	0.072158
271	Aldoc	11676	aldolase C, fructose-bisphosphate	3	0	0	2186	-0.28	0.03825	0.6824	0	0.00412572	0	0.304043	-0.0968025	0.160386	0.999548	-0.231196	1.17e-08	2.65e-06	-0.514218	1.81e-16	9.66e-14
272	Itm2c	64294	integral membrane protein 2C	3	0	0	2885	-0.17	0.07021	0.8349	7.27e-08	0.00416376	9.8e-06	0.304043	-0.0795301	0.160878	0.999548	-0.148289	0.000205094	0.0109595	-0.278122	8.3e-06	0.000455051
273	Usp2	53376	ubiquitin specific peptidase 2	3	0	0	2227	0.29	0.03987	0.6978	3.44e-05	0.00423395	0.0022525	0.304043	0.357869	0.011971	0.605197	0.155528	0.161776	1	0.346178	0.000135612	0.00440424
274	Mgst1	56615	microsomal glutathione S-transferase 1	3	0	0	1505	-0.43	0.0163	0.5245	0.000120128	0.00416599	0.00674699	0.304043	-0.367499	0.160906	0.999548	-0.475592	0.00473469	1	-0.438353	0.00144948	0.027709
275	Hid1	217310	HID1 domain containing	3	0	0	4131	-0.09	0.1475	1.008	0.00265839	0.00421988	0.0761884	0.304043	-0.0687734	0.101409	0.999548	-0.0596907	0.161597	0.685211	-0.155029	0.00263562	0.0438048
276	mt-Nd1	17716	mitochondrially encoded NADH dehydrogenase 1	3	0	0	2784	0.2	0.06502	0.8233	0.00621355	0.00420245	0.13949	0.304043	0.132139	0.161374	0.999548	0.15351	0.103035	0.58288	0.327088	0.00739448	0.0899753
277	Pabpn1	54196	poly(A) binding protein, nuclear 1	3	0	0	3161	0.17	0.08524	0.8776	0.00794451	0.00422286	0.168148	0.304043	0.12687	0.151797	0.999548	0.10878	0.161635	0.685211	0.271167	0.00681559	0.0857383
278	Gls	14660	glutaminase	3	0	0	5991	-0.05	0.297	1.04	0.0127685	0.00419567	0.233397	0.304043	0.0753383	0.146313	0.999548	-0.0889546	0.161287	0.685211	-0.146167	0.0129256	0.131077
279	Nfia	18027	nuclear factor I/A	3	0	0	6247	0.04	0.3195	1.062	0.022696	0.0042183	0.343712	0.304043	0.134993	0.0706006	0.999548	-0.117029	0.0562438	0.455985	0.0970928	0.161577	0.561059
280	Cyfip1	20430	cytoplasmic FMR1 interacting protein 1	3	0	0	4134	-0.09	0.1477	1.008	0.057788	0.00415186	0.602355	0.304043	-0.0939157	0.123903	0.999548	-0.0887281	0.112992	0.609199	-0.0799716	0.160724	0.559427
281	Ppp1r18	76448	protein phosphatase 1, regulatory subunit 18	3	0	0	4321	0.15	0.1613	1.019	0.00495807	0.00428207	0.119391	0.306404	-0.186963	0.078089	0.999548	0.222932	0.162387	1	0.405271	0.00732439	0.0894107
282	Gpc3	14734	glypican 3	3	0	0	1216	-0.49	0.009867	0.4389	0.00190815	0.00432646	0.0595824	0.307649	-0.374008	0.162946	1	-0.422083	0.0438609	1	-0.666085	0.0040404	0.0596308
283	Galnt17	212996	polypeptide N-acetylgalactosaminyltransferase 17	3	0	0	4087	-0.12	0.1444	1.006	0.00694853	0.00434537	0.150716	0.307649	0.203965	0.163183	0.999548	-0.247807	0.0515788	1	-0.318639	0.0167965	0.156813
284	Gpr68	238377	G protein-coupled receptor 68	3	0	0	1050	0.94	0.006936	0.3549	0.0432508	0.0043309	0.513367	0.307649	2.77198	0.14219	1	-0.266617	0.163002	1	0.328738	0.0653063	0.344776
285	Pdlim4	30794	PDZ and LIM domain 4	3	0	0	4619	-0.02	0.1836	1.026	0.000111083	0.00439075	0.00630947	0.309771	-0.235895	0.163749	0.999548	-0.162005	0.157677	1	0.346523	3.91e-05	0.00164257
286	Tmem200c	622645	transmembrane protein 200C	3	0	0	2550	-0.19	0.05375	0.7764	0.0566329	0.00440968	0.593629	0.310019	-0.183877	0.130536	0.999548	-0.182595	0.102228	1	-0.191831	0.163984	0.565844
287	Gde1	56209	glycerophosphodiester phosphodiesterase 1	3	0	0	3349	-0.13	0.09623	0.9388	2.43e-05	0.00446143	0.00166086	0.312564	-0.0791553	0.164623	0.999548	-0.126774	0.00369808	0.0957591	-0.180524	0.000290742	0.00830896
288	Glul	14645	glutamate-ammonia ligase (glutamine synthetase)	3	0	0	2767	-0.19	0.06419	0.8138	2.27e-07	0.00454139	2.8e-05	0.315693	-0.0779923	0.165601	0.999548	-0.151905	0.00114643	0.0394079	-0.32713	5.04e-06	0.000304128
289	Kcnq5	226922	potassium voltage-gated channel, subfamily Q, member 5	3	0	0	3030	0.18	0.07797	0.8543	0.000582353	0.00455319	0.0233254	0.315693	0.151705	0.066194	0.999548	0.112403	0.165744	0.689975	0.265734	0.000636942	0.0151597
290	Rsph6a	83434	radial spoke head 6 homolog A (Chlamydomonas)	3	0	0	865.1	0.76	0.004328	0.2882	0.0552991	0.00454626	0.584595	0.315693	0.757473	0.145152	1	0.941015	0.088062	1	0.586278	0.16566	1
291	Pcgf2	22658	polycomb group ring finger 2	3	0	0	3277	-0.19	0.09196	0.9226	0.0205838	0.00461486	0.324356	0.318462	-0.595673	0.0210611	0.748998	-0.384206	0.16106	1	0.420046	0.166489	0.571248
292	Slc48a1	67739	solute carrier family 48 (heme transporter), member 1	3	0	0	4257	-0.09	0.1566	1.017	0.0248391	0.0046248	0.363934	0.318462	-0.0813068	0.166609	0.999548	-0.0687994	0.157772	0.680701	-0.105615	0.0274754	0.213733
293	Hnrnpc	15381	heterogeneous nuclear ribonucleoprotein C	3	0	0	5452	0.1	0.2508	1.057	0.000184144	0.00466252	0.00953185	0.319963	-0.0912493	0.16706	0.999548	0.0919281	0.0291343	0.336447	0.309362	0.000372312	0.0100391
294	Cinp	67236	cyclin-dependent kinase 2 interacting protein	3	0	0	3149	-0.14	0.08456	0.8944	0.0420873	0.00471255	0.505616	0.322297	-0.142411	0.138697	0.999548	-0.15816	0.0627324	0.475795	-0.111517	0.167656	0.573948
295	Mdfic	16543	MyoD family inhibitor domain containing	3	0	0	1704	-0.37	0.02176	0.5856	5.23e-05	0.00476017	0.00324709	0.322319	-0.278533	0.168219	0.999548	-0.538679	0.000238234	1	-0.294831	0.0105873	0.114896
296	Map3k11	26403	mitogen-activated protein kinase kinase kinase 11	3	0	0	1838	-0.31	0.02587	0.6113	0.00163757	0.00473307	0.0530218	0.322319	-0.233273	0.167899	0.999548	-0.352873	0.0200143	1	-0.347557	0.00714417	0.0880517
297	Thoc5	107829	THO complex 5	3	0	0	6384	-0.03	0.3317	1.054	0.0501741	0.00476096	0.555535	0.322319	-0.0880874	0.120445	0.999548	0.0908836	0.168228	0.691016	-0.106247	0.0914429	0.418002
298	Sfxn5	94282	sideroflexin 5	3	0	0	3518	-0.12	0.1066	0.9678	0.0108193	0.00485259	0.207778	0.327419	-0.0867574	0.1693	0.999548	-0.142477	0.011773	0.206088	-0.123452	0.123926	0.48771
299	Atf5	107503	activating transcription factor 5	3	0	0	1825	-0.33	0.02546	0.6095	0.000228618	0.00494315	0.0113502	0.332414	-0.31403	0.0899442	0.999548	-0.185953	0.170347	1	-0.483378	0.000152151	0.00478976
300	Ctsb	13030	cathepsin B	3	0	0	9897	0.01	0.6425	1.046	0.00386959	0.0050555	0.0988639	0.338837	-0.0557476	0.146219	0.999548	-0.0402539	0.171628	0.694785	0.115104	0.00272546	0.0444881
301	Lrrn3	16981	leucine rich repeat protein 3, neuronal	3	0	0	6117	0.03	0.308	1.061	8.45e-05	0.00510789	0.00495321	0.34052	0.14935	0.000313942	0.0779103	0.0700157	0.172219	0.694785	-0.142304	0.0136081	0.135773
302	Cntn6	53870	contactin 6	3	0	0	2092	0.31	0.03467	0.6794	0.0195102	0.00511449	0.314748	0.34052	0.174887	0.172293	0.999548	0.319959	0.0626541	1	0.431141	0.048793	0.294788
303	Lhx2	16870	LIM homeobox protein 2	3	0	0	2990	-0.16	0.07577	0.8549	1.03e-06	0.00517369	0.000105024	0.343324	-0.116306	0.109409	0.999548	-0.0819464	0.172955	0.695845	-0.29528	2.68e-07	2.64e-05
304	Adam15	11490	a disintegrin and metallopeptidase domain 15 (metargidin)	3	0	0	3837	-0.1	0.1273	0.9894	0.00162213	0.00523373	0.052777	0.346166	-0.0717339	0.173622	0.999548	-0.142964	0.00253505	0.0723352	-0.0925483	0.053925	0.312286
305	Elmo1	140580	engulfment and cell motility 1	3	0	0	2421	0.24	0.04796	0.7517	0.000534276	0.00532386	0.0219581	0.350973	0.152236	0.174613	0.999548	0.289055	0.00609052	1	0.287471	0.00593475	0.0774973
306	Adgre1	13733	adhesion G protein-coupled receptor E1	3	0	0	1411	-0.44	0.01403	0.4898	0.0208177	0.00544137	0.325998	0.357548	-1.46728	0.05506	1	1.02057	0.0591804	1	-0.862374	0.175888	1
307	Fdft1	14137	farnesyl diphosphate farnesyl transferase 1	3	0	0	3372	-0.19	0.09762	0.9414	1.11e-05	0.00549642	0.000849014	0.359989	-0.0526385	0.116283	0.999548	-0.0444707	0.176479	0.700106	-0.473769	3.55e-06	0.00022453
308	Arid3a	13496	AT rich interactive domain 3A (BRIGHT-like)	3	0	0	2959	0.05	0.07411	0.8457	0.00922752	0.00556066	0.184799	0.360879	0.55821	0.177164	1	-1.00875	0.00911195	1	0.584828	0.125086	0.489205
309	Rnf207	433809	ring finger protein 207	3	0	0	2082	-0.17	0.03431	0.6602	0.0221715	0.00555451	0.339271	0.360879	-0.735018	0.141071	1	0.9247	0.0249073	1	-0.714144	0.177099	1
310	Coro2b	235431	coronin, actin binding protein, 2B	3	0	0	2953	-0.15	0.07378	0.8457	0.0528287	0.00556385	0.571766	0.360879	-0.168124	0.177198	0.999548	-0.144439	0.120332	0.6229	-0.142217	0.0932589	0.421729
311	Clcn3	12725	chloride channel, voltage-sensitive 3	3	0	0	2756	0.22	0.06363	0.8201	1.14e-12	0.0056201	4.03e-10	0.362191	0.076096	0.177793	0.999548	0.230957	1.34e-05	0.00112494	0.36331	7.86e-10	1.5e-07
312	Add1	11518	adducin 1 (alpha)	3	0	0	4612	-0.07	0.1831	1.025	0.00022813	0.00568011	0.0113502	0.362191	-0.0459634	0.178424	0.999548	-0.0663523	0.0284742	0.335732	-0.112292	0.000457715	0.0118183
313	Retreg2	227298	reticulophagy regulator family member 2	3	0	0	5977	-0.06	0.2957	1.04	0.00524771	0.00562749	0.124723	0.362191	0.046244	0.177871	0.999548	-0.106383	0.00999342	0.181838	-0.112327	0.0560608	0.318592
314	Zc3h8	57432	zinc finger CCCH type containing 8	3	0	0	1934	-0.29	0.02905	0.6287	0.0185997	0.00568103	0.305869	0.362191	-0.377021	0.0368189	0.925828	-0.225149	0.178433	1	-0.275486	0.0753482	0.376258
315	Usp49	224836	ubiquitin specific peptidase 49	3	0	0	3890	0.17	0.1308	0.9909	0.0230244	0.00567402	0.346781	0.362191	0.24252	0.17836	0.999548	-0.311144	0.108109	1	0.577443	0.0339058	0.238629
316	Mapk1ip1l	218975	mitogen-activated protein kinase 1 interacting protein 1-like	3	0	0	6560	0.03	0.3475	1.074	0.102566	0.00569216	0.803703	0.362191	-0.118138	0.17855	0.999548	0.11531	0.159269	0.681356	0.104366	0.178071	0.590229
317	Adgrf5	224792	adhesion G protein-coupled receptor F5	3	0	0	957.6	-0.29	0.00555	0.377	0.0544513	0.00571713	0.58036	0.362632	-1.79543	0.15661	1	-1.16898	0.17881	1	2.0892	0.0740253	1
318	Wdr49	213248	WD repeat domain 49	3	0	0	125.6	-1.84	2.03e-05	0.05824	0.0635819	0.00575913	0.631329	0.363006	-2.15874	0.130287	1	-1.96607	0.11	1	-1.40035	0.179247	1
319	Mex3b	108797	mex3 RNA binding family member B	3	0	0	3173	0.16	0.08594	0.8798	0.0660879	0.00575886	0.641637	0.363006	0.132337	0.114767	0.999548	0.137359	0.179244	0.704748	0.207045	0.13179	0.50259
320	Abca1	11303	ATP-binding cassette, sub-family A (ABC1), member 1	3	0	0	2279	0.31	0.04199	0.7113	5.76e-06	0.00581225	0.000492457	0.365209	0.212534	0.105505	0.999548	0.129426	0.179797	0.705975	0.580147	1.83e-06	0.00013245
321	Wdr6	83669	WD repeat domain 6	3	0	0	3169	-0.15	0.08569	0.8987	2.83e-14	0.00585098	1.19e-11	0.366498	-0.0627101	0.180195	0.999548	-0.20102	4.82e-14	2.36e-11	-0.17756	0.00431807	0.062195
322	Fxyd6	59095	FXYD domain-containing ion transport regulator 6	3	0	0	4171	0.1	0.1504	1.012	0.0286745	0.00594441	0.401392	0.371193	0.0693788	0.154401	0.999548	0.103714	0.031208	0.347006	0.12873	0.181149	0.595075
323	Lin7b	22342	lin-7 homolog B (C. elegans)	3	0	0	5154	-0.05	0.226	1.031	0.039921	0.00600054	0.488581	0.373538	-0.176575	0.181717	0.999548	0.182877	0.0698512	1	-0.164244	0.107005	0.452452
324	Slitrk6	239250	SLIT and NTRK-like family, member 6	3	0	0	1325	-0.45	0.0121	0.4686	0.0216087	0.00614489	0.33294	0.381344	-1.6445	0.0351001	1	1.025	0.0935922	1	-0.74524	0.183163	0.598013
325	Mbp	17196	myelin basic protein	3	0	0	3914	0.16	0.1325	0.9938	0.0336522	0.00616638	0.441386	0.3815	-0.328065	0.0816391	0.999548	0.338314	0.183376	0.71007	0.468031	0.0721371	0.366157
326	Cxxc1	74322	CXXC finger 1 (PHD domain)	3	0	0	3313	0.15	0.09407	0.9142	0.00621591	0.00619749	0.13949	0.382249	0.10474	0.183684	0.999548	0.189523	0.0137505	0.220834	0.14474	0.0487016	0.294788
327	Pgk1	18655	phosphoglycerate kinase 1	3	0	0	3787	-0.11	0.1239	0.9886	2.9e-06	0.00638834	0.000268608	0.391617	-0.0594823	0.185551	0.999548	-0.0774877	0.0102721	0.185213	-0.199368	8.45e-06	0.000461687
328	Gstm1	14862	glutathione S-transferase, mu 1	3	0	0	3053	-0.15	0.07921	0.8722	0.00326582	0.0063797	0.0876715	0.391617	-0.100127	0.185467	0.999548	-0.169606	0.0125122	0.212563	-0.168999	0.0239327	0.198111
329	Wbp1	22377	WW domain binding protein 1	3	0	0	5343	-0.06	0.2416	1.036	0.0605171	0.00641489	0.615451	0.392049	0.129798	0.185807	0.999548	-0.122791	0.149383	0.668751	-0.192994	0.0864139	0.405901
330	Usp22	216825	ubiquitin specific peptidase 22	3	0	0	4298	-0.13	0.1595	1.018	1.42e-12	0.00658308	4.84e-10	0.398693	0.0551342	0.187417	0.999548	-0.184693	1.95e-08	4.24e-06	-0.26901	6.45e-07	5.36e-05
331	Kcnn1	84036	potassium intermediate/small conductance calcium-activated channel, subfamily N, member 1	3	0	0	1860	-0.34	0.02659	0.6152	0.000137813	0.0065783	0.00744893	0.398693	-0.439077	0.0396994	0.938535	-0.147324	0.187372	1	-0.4273	0.000174028	0.00534677
332	Cxadr	13052	coxsackie virus and adenovirus receptor	3	0	0	3250	0.18	0.09038	0.9005	0.00341031	0.00654983	0.0901344	0.398693	0.0830029	0.187101	0.999548	0.106625	0.129017	0.635771	0.35192	0.00242612	0.0413995
333	Aplp2	11804	amyloid beta (A4) precursor-like protein 2	3	0	0	4510	-0.08	0.1753	1.022	0.0162229	0.00663531	0.276469	0.400649	-0.0592072	0.187912	0.999548	-0.0686208	0.0345992	0.364891	-0.103654	0.0637961	0.340592
334	Etv5	104156	ets variant 5	3	0	0	4858	-0.07	0.2022	1.03	0.0266494	0.0066851	0.382197	0.401246	-0.137553	0.0722136	0.999548	-0.167	0.0582443	0.463199	0.0984619	0.188381	0.605568
335	Apoo	68316	apolipoprotein O	3	0	0	6410	-0.02	0.334	1.056	0.0384553	0.00667027	0.478479	0.401246	0.142341	0.0412291	0.95167	-0.098085	0.166405	0.690297	-0.109117	0.188241	0.605568
336	Ocm	18261	oncomodulin	3	0	0	1146	-0.54	0.008569	0.4223	0.0357308	0.00673616	0.459249	0.403107	-1.24809	0.0698345	1	-1.41569	0.0887192	1	1.03167	0.188859	1
337	Cd81	12520	CD81 antigen	3	0	0	7136	0	0.3995	1.107	0.00136823	0.00681382	0.0457756	0.404473	-0.0506335	0.189582	0.999548	-0.0651544	0.0154522	0.236974	0.11281	0.0066014	0.0838579
338	Rnf187	108660	ring finger protein 187	3	0	0	4822	-0.07	0.1993	1.029	0.00560585	0.00681933	0.130914	0.404473	-0.0454943	0.189633	0.999548	-0.0502257	0.0855596	0.540384	-0.109178	0.00666654	0.0841116
339	Arpc5	67771	actin related protein 2/3 complex, subunit 5	3	0	0	4936	-0.06	0.2084	1.031	0.0281109	0.00680188	0.396372	0.404473	-0.0518778	0.170028	0.999548	-0.0397452	0.189471	0.721783	-0.101881	0.0263924	0.209459
340	Syn2	20965	synapsin II	3	0	0	5103	-0.09	0.2218	1.031	2.35e-05	0.00687139	0.00161538	0.406362	0.0892245	0.190114	0.999548	-0.0984498	0.0185073	0.267287	-0.257061	4.83e-05	0.00194679
341	Dusp15	252864	dual specificity phosphatase-like 15	3	0	0	4655	-0.1	0.1864	1.025	0.0624588	0.0069179	0.623544	0.407677	-0.214326	0.106845	0.999548	0.109668	0.190542	0.722686	-0.193649	0.123095	0.486044
342	Mlc1	170790	megalencephalic leukoencephalopathy with subcortical cysts 1 homolog (human)	3	0	0	6255	-0.03	0.3203	1.052	0.0844051	0.00693418	0.73247	0.407677	-0.104246	0.178096	0.999548	-0.0607146	0.190692	0.722686	0.0717126	0.112695	0.463734
343	Cadm1	54725	cell adhesion molecule 1	3	0	0	3435	-0.13	0.1014	0.9542	7.37e-07	0.00697387	7.88e-05	0.408685	-0.0513753	0.191055	0.999548	-0.164233	2.96e-05	0.00217747	-0.169979	0.000620087	0.0148693
344	Clcn7	26373	chloride channel, voltage-sensitive 7	3	0	0	2775	-0.17	0.06458	0.8156	0.00130171	0.00699198	0.0440732	0.408685	-0.110763	0.19122	0.999548	-0.156425	0.0313402	0.347006	-0.238504	0.00303947	0.0484383
345	Bud31	231889	BUD31 homolog	3	0	0	6453	0.04	0.3379	1.071	0.0616675	0.00704121	0.621216	0.41037	-0.101737	0.191668	0.999548	0.106211	0.147294	0.665287	0.122328	0.0872085	0.407496
346	Sema6b	20359	sema domain, transmembrane domain (TM), and cytoplasmic domain, (semaphorin) 6B	3	0	0	3702	-0.11	0.1183	0.9832	0.000229971	0.00710349	0.0113892	0.41165	-0.137872	0.00417385	0.387406	-0.0506372	0.192231	0.724558	-0.148873	0.00292557	0.0470805
347	Sinhcaf	56306	SIN3-HDAC complex associated factor	3	0	0	4148	0.09	0.1487	1.01	0.00686207	0.00710413	0.149079	0.41165	-0.433679	0.0079944	0.510663	0.276578	0.192237	1	0.430692	0.0905611	0.416183
348	Lbh	77889	limb-bud and heart	3	0	0	1394	0.46	0.01362	0.4723	0.00645625	0.00725229	0.143323	0.419028	0.40936	0.0239416	0.79101	0.364181	0.193564	1	0.620401	0.0278297	0.215049
349	Adora1	11539	adenosine A1 receptor	3	0	0	3635	0.14	0.114	0.965	5.1e-06	0.00728073	0.000449351	0.419466	0.0766183	0.193817	0.999548	0.100311	0.0593246	0.465107	0.242076	2.64e-06	0.000173336
350	Efhd2	27984	EF hand domain containing 2	3	0	0	3334	-0.13	0.09535	0.9352	0.00259145	0.00731826	0.0746508	0.420423	-0.0898485	0.194149	0.999548	-0.129883	0.0228251	0.29358	-0.165649	0.00944815	0.105798
351	Fam131a	78408	family with sequence similarity 131, member A	3	33.3333	0	729.3	-0.35	0.002835	0.2893	3.65e-11	0.00739878	9.17e-09	0.423838	0.614225	0.194859	0.999548	-24.011	2.46e-07	1	22.3497	1.56e-06	0.000117125
352	Mapk1	26413	mitogen-activated protein kinase 1	3	0	0	4909	-0.09	0.2063	1.03	5.72e-09	0.00747264	9.67e-07	0.426853	0.0887296	0.195505	0.999548	-0.121938	0.00326009	0.0879029	-0.248826	2.7e-08	3.56e-06
353	Acsf2	264895	acyl-CoA synthetase family member 2	3	0	0	2403	-0.21	0.04721	0.7381	0.000159195	0.00757969	0.00841283	0.430522	-0.164165	0.196434	0.999548	-0.159167	0.0623081	0.474292	-0.29249	0.000125019	0.00415031
354	Fgf12	14167	fibroblast growth factor 12	3	0	0	3927	0.11	0.1333	0.9956	0.0617438	0.00757102	0.621363	0.430522	0.129243	0.0994321	0.999548	0.106461	0.126317	0.635354	0.0856873	0.196359	0.616021
355	Slc38a2	67760	solute carrier family 38, member 2	3	0	0	3370	0.16	0.0975	0.9208	0.000559515	0.00768893	0.0227276	0.434525	0.0994775	0.0744593	0.999548	0.0924205	0.197373	0.730413	0.294018	0.000453532	0.0117578
356	Rpl7l1	66229	ribosomal protein L7-like 1	3	0	0	3347	0.15	0.09613	0.9195	0.00974807	0.00769338	0.192929	0.434525	0.0993774	0.197411	0.999548	0.126209	0.117076	0.61593	0.23002	0.00936436	0.105421
357	Hacd3	57874	3-hydroxyacyl-CoA dehydratase 3	3	0	0	3911	-0.1	0.1323	1.001	0.000318086	0.00778801	0.0146692	0.437162	-0.0506189	0.198218	0.999548	-0.130047	0.000364652	0.0168773	-0.125599	0.047447	0.290431
358	Hcn1	15165	hyperpolarization-activated, cyclic nucleotide-gated K+ 1	3	0	0	2805	0.2	0.06611	0.8282	0.00120738	0.00778593	0.0420742	0.437162	0.292515	0.0013361	0.233552	0.105159	0.1982	0.730413	0.211244	0.0628516	0.337098
359	Pbrm1	66923	polybromo 1	3	0	0	3671	0.13	0.1163	0.9703	0.00961463	0.00780531	0.190652	0.437162	0.110205	0.0525555	0.999548	0.0901201	0.198364	0.730413	0.181829	0.0204017	0.17813
360	Dbndd2	52840	dysbindin (dystrobrevin binding protein 1) domain containing 2	3	0	0	2362	-0.22	0.04544	0.7251	5.52e-06	0.00785322	0.000477996	0.438624	-0.190722	0.103243	0.999548	-0.12193	0.198769	0.730413	-0.356969	1.61e-06	0.000119912
361	D630003M21Rik	228846	RIKEN cDNA D630003M21 gene	3	0	33.3333	1756	0.11	0.02331	0.5778	0.000337031	0.00788442	0.015326	0.439147	1.18002	0.0732409	1	0.628351	0.199032	1	-1.47891	0.000251769	0.00736351
362	Hist2h3c1	15077	histone cluster 2, H3c1	3	0	0	502.1	-0.9	0.001076	0.2041	0.0283461	0.00796665	0.398121	0.441845	-1.24909	0.199722	1	1.04609	0.196801	1	-2.50804	0.0218714	1
363	Arhgap31	12549	Rho GTPase activating protein 31	3	0	0	2934	0.18	0.07277	0.8448	0.0519769	0.00797681	0.566909	0.441845	0.233816	0.0692697	0.999548	0.115982	0.199807	0.731297	0.193383	0.140504	0.519437
364	Arhgap11a	228482	Rho GTPase activating protein 11A	3	0	0	4593	0.02	0.1816	1.039	0.0252681	0.00801994	0.367364	0.443014	0.218001	0.0842213	0.999548	0.221673	0.0438166	1	-0.385224	0.200166	0.622766
365	Amotl2	56332	angiomotin-like 2	3	0	0	3550	0.14	0.1086	0.952	0.0030379	0.00810947	0.0831061	0.446732	0.0981961	0.200908	0.999548	0.106665	0.0491417	0.434368	0.208592	0.00514863	0.0710217
366	Meis3	17537	Meis homeobox 3	3	0	0	3132	0.16	0.08362	0.8725	0.0261084	0.00816726	0.37551	0.447464	0.106537	0.201384	0.999548	0.207158	0.0241337	1	0.168505	0.158677	0.555803
367	Pip5k1a	18720	phosphatidylinositol-4-phosphate 5-kinase, type 1 alpha	3	0	0	2652	0.2	0.05856	0.8065	0.125948	0.0081578	0.890765	0.447464	0.174837	0.201306	0.999548	0.219648	0.181596	1	0.215669	0.187162	0.605156
368	Kras	16653	Kirsten rat sarcoma viral oncogene homolog	3	0	0	4338	0.09	0.1625	1.021	0.0125106	0.00823101	0.230146	0.449731	0.0663381	0.184166	0.999548	0.130715	0.007992	0.155039	0.0768635	0.201907	0.625576
369	Slc35f1	215085	solute carrier family 35, member F1	3	0	0	4508	0.09	0.1752	1.037	0.0446907	0.00825433	0.523114	0.449782	0.0719539	0.180772	0.999548	0.0656193	0.202097	0.733289	0.125477	0.0433135	0.274598
370	Sdc2	15529	syndecan 2	3	0	0	5333	-0.05	0.2408	1.036	0.052976	0.00831385	0.572244	0.451802	-0.118912	0.202582	0.999548	-0.124058	0.0537501	0.448783	0.0797449	0.18332	0.598013
371	Narf	67608	nuclear prelamin A recognition factor	3	0	0	6049	-0.05	0.3021	1.045	0.0317259	0.00835803	0.428191	0.452978	0.0749746	0.20294	0.999548	-0.0910218	0.15354	0.675024	-0.13665	0.0320387	0.231322
372	Npy2r	18167	neuropeptide Y receptor Y2	3	0	0	210.2	1.56	9.37e-05	0.07851	0.00991151	0.00842668	0.195192	0.455471	1.16861	0.0284049	1	1.08989	0.203494	1	2.40925	0.0382394	1
373	Pgm1	66681	phosphoglucomutase 1	3	0	0	3247	-0.14	0.09018	0.9154	0.00205954	0.00851609	0.0630307	0.45907	-0.08168	0.204211	0.999548	-0.149357	0.00496352	0.115776	-0.174267	0.0312477	0.227955
374	Enpp1	18605	ectonucleotide pyrophosphatase/phosphodiesterase 1	3	0	0	895	0.73	0.004704	0.2947	0.02518	0.00866829	0.366349	0.466025	0.741139	0.0917072	1	0.849999	0.0390309	1	0.591426	0.205421	0.62916
375	Nts	67405	neurotensin	3	0	0	6326	0.04	0.3265	1.065	0.00619062	0.00869439	0.139389	0.466182	-0.42198	0.0077724	0.509738	-0.367153	0.205627	1	0.896273	0.0765756	0.380674
376	Thrsp	21835	thyroid hormone responsive	3	0	33.3333	475.4	-1.03	0.0009297	0.201	1.19e-05	0.00881337	0.000890349	0.471304	-0.450055	0.206561	1	-0.69666	0.192766	1	-1.92835	1.97e-06	0.000138986
377	Sema6a	20358	sema domain, transmembrane domain (TM), and cytoplasmic domain, (semaphorin) 6A	3	0	0	2899	0.18	0.07095	0.8352	0.0401636	0.00887037	0.490327	0.473094	0.20537	0.0358564	0.918959	0.138961	0.184491	0.711573	0.195293	0.207005	0.631138
378	Lrtm2	211187	leucine-rich repeats and transmembrane domains 2	3	0	0	2402	-0.33	0.04715	0.7389	0.00739749	0.00895025	0.159082	0.476092	-0.51708	0.207624	1	0.454015	0.207624	1	-0.934688	0.00354701	0.0540338
379	Snrpn	20646	small nuclear ribonucleoprotein N	3	0	0	7136	0.01	0.3994	1.107	0.133891	0.00897684	0.917427	0.476246	0.0700551	0.18797	0.999548	0.0608786	0.20783	0.738141	-0.104456	0.191812	0.611685
380	Ankrd13d	68423	ankyrin repeat domain 13 family, member D	3	0	0	3431	-0.12	0.1012	0.953	0.0601313	0.0090249	0.61472	0.477536	-0.0941056	0.2082	0.999548	-0.112163	0.164144	0.687347	-0.162328	0.0695648	0.358069
381	Fgfr1op2	67529	FGFR1 oncogene partner 2	3	0	0	5186	-0.07	0.2287	1.034	0.000110994	0.00914757	0.00630947	0.478985	-0.101385	0.209139	0.999548	0.131585	0.132678	0.642406	-0.239926	3.63e-05	0.00155251
382	Zfp9	22750	zinc finger protein 9	3	0	0	7888	-0.01	0.4677	1.128	0.027161	0.00912753	0.386502	0.478985	0.141413	0.208986	0.999548	0.223071	0.138923	1	-0.401056	0.0279845	0.215724
383	Zfand2a	100494	zinc finger, AN1-type domain 2A	3	0	0	3973	-0.1	0.1365	1.003	0.0469937	0.00912979	0.53729	0.478985	-0.0878897	0.209004	0.999548	-0.0896412	0.0806986	0.527016	-0.108765	0.100458	0.437021
384	Trmt12	68260	tRNA methyltranferase 12	3	0	0	4611	-0.08	0.183	1.025	0.0604605	0.0090906	0.615424	0.478985	-0.20521	0.114011	0.999548	0.178374	0.208704	1	-0.221492	0.100672	0.437309
385	Map2k2	26396	mitogen-activated protein kinase kinase 2	3	0	0	6782	-0.03	0.3674	1.084	0.101705	0.00917587	0.799446	0.479219	-0.0777686	0.139921	0.999548	0.0696058	0.170769	0.693697	-0.0776909	0.209355	0.634668
386	Adk	11534	adenosine kinase	3	0	0	3573	-0.11	0.11	0.9769	0.0263415	0.00922221	0.378321	0.479328	-0.100327	0.0937192	0.999548	-0.150603	0.0397019	0.388489	-0.0915261	0.209706	0.634706
387	Cdc16	69957	CDC16 cell division cycle 16	3	0	0	7459	0.02	0.4288	1.124	0.0346176	0.00922564	0.449649	0.479328	-0.093451	0.0425627	0.953434	0.0789321	0.125639	0.634457	0.0629726	0.209732	0.634706
388	Slc18b1	76306	solute carrier family 18, subfamily B, member 1	3	0	0	4977	-0.05	0.2117	1.033	0.0701004	0.00926793	0.662986	0.480284	0.211967	0.210052	0.999548	-0.182639	0.170121	1	-0.190735	0.0823886	0.395595
389	Icam5	15898	intercellular adhesion molecule 5, telencephalin	3	0	0	5579	-0.06	0.2615	1.039	0.0053263	0.00942423	0.126144	0.486178	0.101409	0.211227	0.999548	-0.084325	0.0679642	0.493812	-0.209356	0.00707066	0.0876177
390	Rab11fip4	268451	RAB11 family interacting protein 4 (class II)	3	0	0	5676	-0.05	0.2697	1.04	0.0153629	0.00943001	0.265862	0.486178	0.148348	0.157415	0.999548	-0.0956255	0.21127	0.746414	-0.190416	0.0116266	0.122292
391	Crym	12971	crystallin, mu	3	0	0	2777	0.22	0.06471	0.8204	0.000357647	0.00952755	0.0159097	0.486915	0.0945894	0.211996	0.999548	0.186648	0.0045319	0.109623	0.364385	0.00409561	0.0600987
392	Fam160a1	229488	family with sequence similarity 160, member A1	3	0	0	695.4	0.85	0.002514	0.243	0.00306985	0.0095654	0.0835256	0.486915	1.0992	0.0018583	1	0.6982	0.130521	1	0.739197	0.212276	1
393	Tacc1	320165	transforming, acidic coiled-coil containing protein 1	3	0	0	3139	-0.14	0.08401	0.8923	0.00518794	0.00955176	0.123773	0.486915	-0.189251	0.0151926	0.683297	-0.149256	0.0304776	0.343529	-0.0883776	0.212175	0.63909
394	Gal	14419	galanin	3	0	0	111.3	1.89	1.4e-05	0.03526	0.017109	0.00949649	0.288599	0.486915	1.65306	0.121287	1	1.26831	0.211765	1	2.73631	0.0172968	1
395	Kcnh6	192775	potassium voltage-gated channel, subfamily H (eag-related), member 6	3	0	0	957.3	-0.47	0.005545	0.378	0.055524	0.00955704	0.586355	0.486915	-1.52271	0.119924	1	1.67997	0.0836713	1	-1.56	0.212214	1
396	Cnot2	72068	CCR4-NOT transcription complex, subunit 2	3	0	0	3465	0.14	0.1032	0.9364	0.00439335	0.00961444	0.108389	0.488176	0.108849	0.165286	0.999548	0.100332	0.212638	0.747094	0.22389	0.00227561	0.0392504
397	Psmc5	19184	protease (prosome, macropain) 26S subunit, ATPase 5	3	0	0	3994	-0.09	0.1379	1.001	0.00107703	0.00970419	0.0385334	0.491492	-0.10194	0.0180914	0.714103	-0.111716	0.00376191	0.0961413	-0.0657232	0.213298	0.639181
398	Fam234b	74525	family with sequence similarity 234, member B	3	0	0	3670	-0.11	0.1162	0.983	0.00088431	0.0098288	0.0331114	0.496076	-0.0808406	0.214207	0.999548	-0.113867	0.00470587	0.112902	-0.137144	0.0113818	0.121023
399	Alpl	11647	alkaline phosphatase, liver/bone/kidney	3	0	0	2252	-0.23	0.04086	0.7011	0.0269247	0.00984404	0.384592	0.496076	-0.187384	0.178891	0.999548	-0.169935	0.214318	1	-0.323323	0.0209484	0.180907
400	Pkia	18767	protein kinase inhibitor, alpha	3	0	0	7059	-0.03	0.3925	1.105	0.0212054	0.00990425	0.329248	0.49662	0.0747606	0.0322977	0.900598	-0.0379341	0.214754	0.751382	-0.120188	0.0846427	0.401417
401	Btbd9	224671	BTB (POZ) domain containing 9	3	0	0	4206	0.1	0.1529	1.014	0.0789706	0.00988762	0.706052	0.49662	0.0970162	0.122452	0.999548	0.0843827	0.214633	0.751382	0.107898	0.132492	0.503223
402	Slc45a1	242773	solute carrier family 45, member 1	3	0	0	4151	0.1	0.149	1.01	0.0377032	0.00996382	0.472336	0.498365	0.127028	0.033307	0.900598	0.0829921	0.17547	0.700055	0.0821857	0.215183	0.640961
403	Clstn3	232370	calsyntenin 3	3	0	0	7027	-0.03	0.3896	1.103	0.0317979	0.00999256	0.428285	0.498562	0.0551134	0.166127	0.999548	-0.0650627	0.0279839	0.333709	-0.0768935	0.21539	0.640961
404	Ltv1	353258	LTV1 ribosome biogenesis factor	3	0	0	2336	-0.22	0.04435	0.7191	0.0373372	0.0100541	0.470388	0.500392	-0.257188	0.0655722	0.999548	-0.222051	0.0877037	1	-0.179061	0.215832	0.640961
405	Stard4	170459	StAR-related lipid transfer (START) domain containing 4	3	0	0	4701	-0.08	0.1899	1.026	0.0248272	0.0101691	0.363934	0.504867	0.190357	0.0358303	0.918959	-0.145681	0.216651	0.754877	-0.282444	0.092979	0.421256
406	Olr1	108078	oxidized low density lipoprotein (lectin-like) receptor 1	3	0	0	185.6	1.31	6.51e-05	0.06889	0.00222799	0.0102267	0.066863	0.506401	-1.84182	0.21706	1	2.13552	0.051948	1	3.62665	0.00308992	1
407	Prdx6	11758	peroxiredoxin 6	3	0	0	3358	-0.13	0.09677	0.939	0.00411448	0.0102504	0.103412	0.506401	-0.0815755	0.217227	0.999548	-0.199677	0.00301902	0.0829244	-0.113944	0.112477	0.463145
408	Fam107b	66540	family with sequence similarity 107, member B	3	0	0	3477	0.24	0.104	0.9388	9.31e-06	0.0103563	0.00074252	0.507888	-0.0978075	0.217972	0.999548	0.195154	0.035545	1	0.622468	7.7e-06	0.000429747
409	Nucb2	53322	nucleobindin 2	3	0	0	3062	0.19	0.0797	0.8588	0.0008416	0.0103438	0.0319126	0.507888	0.112326	0.151506	0.999548	0.101101	0.217885	0.756359	0.364817	0.000327663	0.00912387
410	Nacc2	67991	nucleus accumbens associated 2, BEN and BTB (POZ) domain containing	3	0	0	3594	-0.11	0.1113	0.9802	0.0106208	0.0103143	0.205067	0.507888	-0.114426	0.188893	0.999548	-0.14845	0.00586774	0.129341	-0.0746814	0.217678	0.643719
411	Zfp994	240038	zinc finger protein 994	3	0	0	1927	0.34	0.0288	0.6307	0.023502	0.0104471	0.35095	0.509853	0.358136	0.0427425	0.953434	0.368614	0.0718778	1	0.297139	0.218607	0.644048
412	Rnf219	72486	ring finger protein 219	3	0	0	5774	0.07	0.2781	1.059	0.143902	0.0104256	0.949603	0.509853	-0.104795	0.218457	0.999548	0.155452	0.204037	1	0.14653	0.187296	0.605156
413	Usp36	72344	ubiquitin specific peptidase 36	3	0	0	8557	0.02	0.5278	1.094	0.00833927	0.0104858	0.173221	0.510504	-0.17779	0.218877	0.999548	-0.140637	0.204678	1	0.373219	0.00396747	0.0587581
414	Cd9	12527	CD9 antigen	3	33.3333	0	2744	0.35	0.06306	0.8185	8.18e-07	0.0105683	8.61e-05	0.51204	-0.345296	0.0897054	0.999548	0.15711	0.21945	1	1.22753	2e-07	2.06e-05
415	Card9	332579	caspase recruitment domain family, member 9	3	0	0	1757	0.45	0.02333	0.5777	0.0434427	0.0105603	0.514733	0.51204	-0.643028	0.219394	1	1.22896	0.0421003	1	0.751614	0.164859	1
416	Edem2	108687	ER degradation enhancer, mannosidase alpha-like 2	3	0	0	5542	-0.03	0.2583	1.039	0.0327218	0.0106348	0.436218	0.514023	-0.114413	0.219909	0.999548	0.201606	0.0510328	1	-0.181838	0.0926955	0.420802
417	Btbd8	100503185	BTB (POZ) domain containing 8	3	0	0	2585	0.24	0.05541	0.7936	0.000139592	0.0108802	0.00752487	0.522189	0.155796	0.221588	0.999548	0.134813	0.0522936	0.444193	0.43394	0.000113388	0.00390625
418	Klhdc3	71765	kelch domain containing 3	3	0	0	5062	0.07	0.2185	1.045	0.0752336	0.0108816	0.689183	0.522189	0.0657735	0.221598	0.999548	0.0541757	0.122274	0.625467	0.0771377	0.120007	0.479436
419	Kmt2e	69188	lysine (K)-specific methyltransferase 2E	3	0	0	3606	0.13	0.1121	0.9597	0.0770378	0.0108714	0.696718	0.522189	0.173199	0.139644	0.999548	0.0836699	0.221528	0.759902	0.128851	0.108688	0.455307
420	Plpp3	67916	phospholipid phosphatase 3	3	0	0	2686	-0.18	0.0602	0.8048	0.00127109	0.0110244	0.0435657	0.524037	-0.107834	0.222562	0.999548	-0.165428	0.00720761	0.144999	-0.266104	0.0110354	0.118226
421	Gm20441		predicted gene 20441	3	0	0	1673	-0.37	0.02084	0.5756	0.00328884	0.010949	0.0879372	0.524037	-0.244347	0.222054	0.999548	-0.383205	0.0657012	1	-0.471269	0.0038397	0.057398
422	Cers2	76893	ceramide synthase 2	3	0	0	5791	0.07	0.2796	1.057	0.0458792	0.0110047	0.531893	0.524037	-0.106024	0.22243	0.999548	0.116424	0.140067	0.652838	0.195688	0.052636	0.308172
423	Slc24a4	238384	solute carrier family 24 (sodium/potassium/calcium exchanger), member 4	3	0	0	2702	-0.18	0.06098	0.8078	0.107435	0.0110028	0.823244	0.524037	-0.210343	0.173803	0.999548	-0.154414	0.222417	1	-0.160672	0.140129	0.518828
424	Pam	18484	peptidylglycine alpha-amidating monooxygenase	3	0	0	3814	0.12	0.1257	0.9852	0.00584397	0.0110768	0.134138	0.525288	0.145415	0.0280888	0.84911	0.0554423	0.222915	0.759902	0.166409	0.0181921	0.163982
425	Cd63	12512	CD63 antigen	3	0	0	8311	0.05	0.5058	1.108	3.29e-08	0.0113268	4.76e-06	0.527142	-0.123633	0.0545103	0.999548	-0.0531526	0.224579	0.759902	0.335407	9.4e-09	1.41e-06
426	Brinp1	56710	bone morphogenic protein/retinoic acid inducible neural specific 1	3	0	0	3342	0.18	0.09577	0.9201	3.63e-05	0.0113261	0.0023646	0.527142	0.364448	6.31e-06	0.00436649	0.0801095	0.224574	0.759902	0.0834599	0.19721	0.617005
427	Marcksl1	17357	MARCKS-like 1	3	0	0	4624	0.09	0.1839	1.039	0.00171977	0.0112444	0.0548009	0.527142	0.055291	0.0986899	0.999548	0.0436546	0.224033	0.759902	0.175609	0.0011519	0.0235182
428	Dnajc1	13418	DnaJ heat shock protein family (Hsp40) member C1	3	0	0	4347	0.05	0.1632	1.021	0.00668978	0.0113104	0.146686	0.527142	0.267582	0.22447	0.999548	-0.447546	0.0182218	1	0.334003	0.0329616	0.234562
429	Etl4	208618	enhancer trap locus 4	3	0	0	2351	0.29	0.04499	0.729	0.0100138	0.0112687	0.196628	0.527142	0.50161	0.0136701	0.640875	0.246197	0.073064	1	0.118775	0.224194	0.649593
430	Tvp23a	383103	trans-golgi network vesicle protein 23A	3	0	0	4702	-0.1	0.19	1.026	0.033381	0.0111943	0.440126	0.527142	-0.302915	0.024022	0.79101	0.1382	0.2237	1	-0.149234	0.198808	0.619445
431	Parp4	328417	poly (ADP-ribose) polymerase family, member 4	3	0	0	4945	0.09	0.2091	1.044	0.0494275	0.0113519	0.553138	0.527142	0.192943	0.224745	0.999548	-0.165915	0.221775	1	0.238433	0.0364191	0.248741
432	Ap1m1	11767	adaptor-related protein complex AP-1, mu subunit 1	3	0	0	4779	-0.07	0.196	1.026	0.0554412	0.0113229	0.585789	0.527142	-0.0541894	0.224553	0.999548	-0.0609763	0.139054	0.652838	-0.0870295	0.0680556	0.353441
433	Lynx1	23936	Ly6/neurotoxin 1	3	0	0	5125	0.08	0.2237	1.043	0.124284	0.0113096	0.885313	0.527142	0.233458	0.142668	0.999548	0.101841	0.224465	0.759902	-0.108831	0.209485	0.634706
434	Prkci	18759	protein kinase C, iota	3	0	0	7282	0.03	0.4127	1.114	0.0463431	0.0115841	0.534301	0.536685	-0.0829073	0.124342	0.999548	0.0621554	0.226267	0.760867	0.0969888	0.0590903	0.326515
435	Tbx15	21384	T-box 15	3	0	0	2489	0.08	0.051	0.7675	0.0122278	0.0116781	0.226602	0.53856	0.649231	0.226877	1	-1.02417	0.0216167	1	0.613437	0.0588525	0.326048
436	Gltp	56356	glycolipid transfer protein	3	0	0	5850	0.06	0.2847	1.056	0.0297171	0.0116526	0.411025	0.53856	-0.110393	0.102869	0.999548	0.115824	0.039242	0.387021	0.189666	0.226712	0.652026
437	S100a16	67860	S100 calcium binding protein A16	3	0	0	2885	-0.16	0.07021	0.8354	1.6e-05	0.0117468	0.00116954	0.539253	-0.173093	0.0686891	0.999548	-0.222567	7.05e-06	0.000690291	-0.096677	0.227321	0.65231
438	Mal2	105853	mal, T cell differentiation protein 2	3	0	0	5177	0.27	0.2279	1.046	0.0167219	0.0117254	0.283339	0.539253	1.04141	0.227183	1	-0.057964	0.14228	0.656391	-0.185614	0.0133437	0.134121
439	Vamp1	22317	vesicle-associated membrane protein 1	3	0	0	2254	-0.22	0.04097	0.7006	0.00112685	0.0118052	0.0398902	0.540638	-0.1921	0.227698	0.999548	-0.194992	0.0576912	1	-0.281125	0.00116652	0.0236387
440	Inpp5b	16330	inositol polyphosphate-5-phosphatase B	3	0	0	3266	-0.13	0.09131	0.9189	0.103476	0.0118308	0.808085	0.540638	-0.162012	0.109055	0.999548	-0.12664	0.20641	0.736432	-0.10344	0.227861	0.653132
441	Samd9l	209086	sterile alpha motif domain containing 9-like	3	0	0	1998	-0.3	0.03128	0.6399	2.33e-08	0.0120988	3.55e-06	0.551636	-0.148024	0.22957	0.999548	-0.460644	2.68e-08	5.63e-06	-0.287485	0.0128397	0.130552
442	G3bp1	27041	GTPase activating protein (SH3 domain) binding protein 1	3	0	0	7700	0.02	0.4507	1.135	0.0226046	0.0122045	0.343287	0.552692	-0.0791895	0.0340394	0.90969	0.0438995	0.230236	0.762849	0.0879607	0.0814357	0.392766
443	Cdkn1b	12576	cyclin-dependent kinase inhibitor 1B	3	0	0	1736	0.4	0.0227	0.5699	0.064843	0.0121673	0.636621	0.552692	0.350317	0.0717956	0.999548	0.365079	0.159881	1	0.473731	0.230002	0.655593
444	Plekha5	109135	pleckstrin homology domain containing, family A member 5	3	0	0	4842	0.06	0.2009	1.044	0.108855	0.0121889	0.82969	0.552692	0.196519	0.194089	0.999548	0.180537	0.123618	1	-0.209552	0.230138	0.655593
445	Nat8f1	66116	N-acetyltransferase 8 (GCN5-related) family member 1	3	0	0	1103	0.66	0.007819	0.3726	0.00380218	0.0122622	0.0976961	0.554057	0.447279	0.230598	1	0.961156	0.00326193	1	0.58394	0.0889843	0.411621
446	Cpm	70574	carboxypeptidase M	3	0	0	3178	0.07	0.08623	0.8796	0.00554932	0.0124143	0.130199	0.557177	-0.971328	0.0236483	1	0.201554	0.231548	1	0.993071	0.0195061	0.17289
447	Cdh12	215654	cadherin 12	3	0	0	2103	0.29	0.03509	0.6803	0.0183721	0.0124079	0.303965	0.557177	0.243832	0.133074	0.999548	0.235017	0.231508	1	0.400025	0.0158133	0.149934
448	Col4a5	12830	collagen, type IV, alpha 5	3	0	0	1646	-0.37	0.02008	0.5703	0.0492445	0.0123684	0.552619	0.557177	-0.372668	0.231262	0.999548	-0.403999	0.0817346	1	-0.336971	0.0955477	0.4258
449	Kbtbd8	243574	kelch repeat and BTB (POZ) domain containing 8	3	0	0	2607	0.21	0.05641	0.8016	0.0867969	0.0124912	0.740444	0.559377	0.199306	0.162747	0.999548	0.17097	0.232025	1	0.264601	0.105474	0.448548
450	Fam181a	100504156	family with sequence similarity 181, member A	3	0	0	659.8	-1.21	0.002199	0.2617	0.0335485	0.0127299	0.441098	0.567718	-3.47847	0.174208	1	0.185004	0.233493	1	-0.334753	0.0264404	0.209459
451	Fa2h	338521	fatty acid 2-hydroxylase	3	0	0	3361	0.19	0.09696	0.9196	0.0482064	0.0127339	0.544848	0.567718	-0.428315	0.0464136	0.965263	0.195439	0.233518	1	0.808599	0.161855	0.561223
452	Banp	53325	BTG3 associated nuclear protein	3	0	0	5180	0.05	0.2281	1.046	0.182772	0.0127929	1	0.569084	0.141323	0.222528	0.999548	0.176208	0.231218	1	-0.165576	0.233878	0.660865
453	Sfxn1	14057	sideroflexin 1	3	0	0	5695	-0.05	0.2713	1.041	0.000502902	0.0129724	0.0208923	0.573264	-0.0882043	0.027784	0.844564	-0.114779	0.000900134	0.03246	0.0577266	0.234967	0.66248
454	Raver2	242570	ribonucleoprotein, PTB-binding 2	3	0	0	2268	-0.23	0.04155	0.7038	0.000540091	0.0129588	0.0220276	0.573264	-0.225782	0.0827566	0.999548	-0.131915	0.234885	1	-0.345259	0.000328872	0.00913765
455	Arid3b	56380	AT rich interactive domain 3B (BRIGHT-like)	3	0	0	2066	0.36	0.03371	0.6772	0.0295381	0.0129573	0.409602	0.573264	0.881304	0.0578388	1	0.71965	0.0668299	1	-0.526292	0.234876	0.66248
456	mt-Atp6	17705	mitochondrially encoded ATP synthase 6	3	0	0	3321	0.15	0.09454	0.9143	0.0348578	0.0130981	0.451892	0.57755	0.119199	0.235723	0.999548	0.141355	0.052222	0.444193	0.176841	0.0919563	0.419149
457	Taf13	99730	TATA-box binding protein associated factor 13	3	0	0	5369	-0.07	0.2438	1.039	0.00650164	0.0132362	0.143816	0.582364	0.102123	0.236549	0.999548	-0.183775	0.00512418	0.118117	-0.125528	0.107334	0.453202
458	Hap1	15114	huntingtin-associated protein 1	3	0	0	6296	0.04	0.3238	1.065	0.00198104	0.0135059	0.0609996	0.585722	0.0882905	0.238145	0.999548	-0.142042	0.00298493	0.0823729	0.162896	0.042508	0.27097
459	Gria2	14800	glutamate receptor, ionotropic, AMPA2 (alpha 2)	3	0	0	6470	0.04	0.3394	1.071	0.020475	0.0135456	0.323402	0.585722	0.101446	0.0208396	0.743774	0.0591848	0.112901	0.609199	-0.046144	0.238378	0.665947
460	Zfp395	380912	zinc finger protein 395	3	0	0	2017	0.31	0.03196	0.668	0.0279734	0.0133897	0.394987	0.585722	0.248368	0.23746	0.999548	0.294921	0.207252	1	0.382189	0.0171647	0.158742
461	Xdh	22436	xanthine dehydrogenase	3	0	0	75.81	-2.1	4.27e-06	0.02863	0.0568044	0.0135219	0.594878	0.585722	-2.38444	0.238239	1	-2.15926	0.044775	1	-1.76228	0.205998	1
462	Akap1	11640	A kinase (PRKA) anchor protein 1	3	0	0	3310	-0.13	0.09389	0.9323	0.0659958	0.0133813	0.641191	0.585722	-0.102816	0.229125	0.999548	-0.0923267	0.23741	0.768015	-0.202707	0.0497426	0.297524
463	Gm49380		predicted gene, 49380	3	0	0	6505	0.02	0.3425	1.072	0.0749538	0.013403	0.687858	0.585722	0.101709	0.120625	0.999548	0.0747854	0.237539	0.768015	-0.115731	0.112889	0.464366
464	Ankrd44	329154	ankyrin repeat domain 44	3	0	0	2266	0.3	0.04145	0.7045	0.105124	0.0134876	0.814542	0.585722	0.17608	0.23267	0.999548	0.17236	0.238037	1	0.536456	0.094761	0.423624
465	Pcgf1	69837	polycomb group ring finger 1	3	0	0	1997	-0.27	0.03122	0.6393	0.131312	0.0134532	0.910622	0.585722	-0.237303	0.237835	0.999548	-0.275177	0.227324	1	-0.294732	0.134637	0.506413
466	U2af1	108121	U2 small nuclear ribonucleoprotein auxiliary factor (U2AF) 1	3	0	0	6792	0.02	0.3683	1.084	0.0159209	0.0136409	0.273142	0.58732	-0.14392	0.0437537	0.956359	0.0796825	0.238936	0.768713	0.133379	0.0387254	0.257652
467	Marveld2	218518	MARVEL (membrane-associating) domain containing 2	3	0	0	482.5	0.89	0.0009673	0.1737	0.0512327	0.0136407	0.562608	0.58732	2.62128	0.0962572	1	-1.82385	0.238935	1	1.86368	0.0828975	1
468	Srsf7	225027	serine/arginine-rich splicing factor 7	3	0	0	6480	-0.03	0.3403	1.062	0.130071	0.013706	0.908104	0.588858	-0.0903631	0.199224	0.999548	0.101247	0.150534	0.669825	-0.0973801	0.239315	0.667398
469	Cbln2	12405	cerebellin 2 precursor protein	3	0	0	5710	0.03	0.2727	1.058	0.0360865	0.0138274	0.46216	0.592375	0.140922	0.24002	0.999548	-0.220529	0.0430621	1	0.173268	0.114723	0.468607
470	Ift20	55978	intraflagellar transport 20	3	0	0	5933	0.04	0.2919	1.058	0.0908002	0.0138467	0.753843	0.592375	-0.175533	0.115286	0.999548	0.158672	0.153454	1	0.134891	0.240131	0.668273
471	Paqr3	231474	progestin and adipoQ receptor family member III	3	0	0	4159	-0.09	0.1496	1.011	0.170205	0.0140039	1	0.597827	-0.0901202	0.241037	0.999548	-0.0829422	0.187399	0.717608	-0.0882757	0.238611	0.666454
472	Wfs1	22393	wolframin ER transmembrane glycoprotein	3	0	0	2036	-0.3	0.03262	0.6455	1.11e-15	0.0141081	6.03e-13	0.601001	-0.125365	0.241633	0.999548	-0.25236	1.12e-07	1.94e-05	-0.510947	4.63e-11	1.12e-08
473	Ddit3	13198	DNA-damage inducible transcript 3	3	0	0	8103	0.05	0.4871	1.124	4.7e-05	0.0142192	0.00296493	0.601016	-0.172266	0.189031	0.999548	-0.139185	0.242265	1	0.472013	8.19e-06	0.000451276
474	Fkbp10	14230	FK506 binding protein 10	3	0	0	2468	-0.24	0.05004	0.7536	0.0041356	0.0142254	0.103684	0.601016	-0.172181	0.242301	0.999548	-0.445227	0.00148393	1	-0.109994	0.206451	0.630559
475	Tcp1	21454	t-complex protein 1	3	0	0	7591	0	0.4408	1.126	0.0468472	0.0142281	0.53729	0.601016	-0.0427239	0.242316	0.999548	-0.0418029	0.192226	0.724558	0.0815907	0.036221	0.247897
476	Apobr	171504	apolipoprotein B receptor	3	0	0	1227	-0.51	0.01008	0.4414	0.122053	0.0141698	0.880246	0.601016	-1.29017	0.241985	1	-1.18857	0.13009	1	0.942138	0.207477	1
477	Rtkn	20166	rhotekin	3	0	0	3778	-0.15	0.1233	0.9892	0.0929831	0.0143475	0.762334	0.604792	-0.368314	0.242992	0.999548	0.241617	0.0966512	1	-0.329297	0.187156	0.605156
478	Smtnl2	276829	smoothelin-like 2	3	0	0	1892	-0.31	0.02763	0.6201	0.0235573	0.0144929	0.35095	0.607434	-0.224215	0.21259	0.999548	-0.429139	0.0129976	1	-0.271416	0.24381	0.672573
479	Msl2	77853	MSL complex subunit 2	3	0	0	3431	0.13	0.1012	0.9307	0.0253958	0.0145139	0.368689	0.607434	0.137023	0.0417375	0.95167	0.154346	0.0730374	0.511697	0.113297	0.243928	0.672573
480	Tpp2	22019	tripeptidyl peptidase II	3	0	0	6682	-0.03	0.3584	1.079	0.0651496	0.0145456	0.638384	0.607434	0.0654376	0.244105	0.999548	-0.0769488	0.109643	0.603503	-0.0933173	0.0992941	0.434
481	Kpna4	16649	karyopherin (importin) alpha 4	3	0	0	6432	-0.02	0.336	1.058	0.150201	0.0145157	0.964887	0.607434	-0.0736054	0.154503	0.999548	-0.0847506	0.236303	0.766615	0.108892	0.243938	0.672573
482	Limd1	29806	LIM domains containing 1	3	0	0	5182	-0.04	0.2284	1.032	0.17171	0.0145613	1	0.607434	-0.145245	0.217623	0.999548	-0.130219	0.205585	0.735885	0.147317	0.244193	0.67278
483	Tnc	21923	tenascin C	3	33.3333	0	1972	0.57	0.03037	0.6538	0	0.0148179	0	0.611795	-0.272054	0.245619	0.999548	0.536452	0.00136634	0.0448678	1.43818	7.64e-31	2.1e-27
484	Dhtkd1	209692	dehydrogenase E1 and transketolase domain containing 1	3	0	0	2186	-0.25	0.03826	0.6819	0.000283565	0.0147698	0.0134472	0.611795	-0.206014	0.100412	0.999548	-0.140163	0.245353	1	-0.407122	0.000121688	0.00410368
485	Grid2ip	170935	glutamate receptor, ionotropic, delta 2 (Grid2) interacting protein 1	3	0	0	215.7	1.53	0.000101	0.07811	0.0653751	0.0148163	0.63906	0.611795	1.14514	0.245611	1	1.05315	0.218305	1	2.37787	0.0498038	1
486	Eif5b	226982	eukaryotic translation initiation factor 5B	3	0	0	2841	0.19	0.06792	0.8302	0.124584	0.0148058	0.885477	0.611795	0.178565	0.199416	0.999548	0.150668	0.245552	1	0.229417	0.13749	0.51292
487	Psenen	66340	presenilin enhancer gamma secretase subunit	3	0	0	3878	0.11	0.13	0.9863	0.148904	0.0147695	0.962278	0.611795	0.115039	0.245352	0.999548	0.0931331	0.181789	0.706768	0.127062	0.197075	0.617005
488	Nnmt	18113	nicotinamide N-methyltransferase	3	0	0	3373	-0.05	0.09766	0.9413	0.0562395	0.014871	0.591426	0.612727	-0.400423	0.245912	1	-0.547219	0.234821	1	0.792876	0.0375323	0.252703
489	Spock3	72902	sparc/osteonectin, cwcv and kazal-like domains proteoglycan 3	3	0	0	3134	0.18	0.08372	0.8722	5.49e-05	0.0149208	0.003384	0.613522	0.0826321	0.246186	0.999548	0.148992	0.0463643	0.41799	0.306514	3.92e-05	0.00164401
490	Pttg1	30939	pituitary tumor-transforming gene 1	3	0	0	3838	-0.1	0.1273	0.9896	0.0467502	0.014971	0.537146	0.61433	-0.308748	0.155584	0.999548	0.368352	0.0438745	1	-0.360811	0.246462	0.674876
491	Tjp2	21873	tight junction protein 2	3	0	0	8027	0.06	0.4803	1.129	2.58e-07	0.0150789	3.09e-05	0.617496	-0.148838	0.247053	0.999548	-0.154985	0.0684271	0.495176	0.494448	6.52e-08	7.51e-06
492	Sik2	235344	salt inducible kinase 2	3	0	0	2856	0.21	0.06874	0.8341	1.19e-05	0.0151273	0.000890349	0.61822	0.0861477	0.247317	0.999548	0.180477	0.024045	0.303297	0.363191	1.32e-05	0.000675062
493	Dbnl	13169	drebrin-like	3	0	0	4296	-0.08	0.1594	1.018	0.0947484	0.015221	0.769949	0.620787	-0.059424	0.247826	0.999548	-0.0963682	0.0922663	0.553941	-0.0948399	0.197495	0.617161
494	Zcrb1	67197	zinc finger CCHC-type and RNA binding motif 1	3	0	0	6299	-0.03	0.3242	1.053	0.185519	0.0153433	1	0.62451	-0.101897	0.222606	0.999548	0.0985887	0.222657	0.759902	-0.100336	0.248489	0.675198
495	Sema5a	20356	sema domain, seven thrombospondin repeats (type 1 and type 1-like), transmembrane domain (TM) and short cytoplasmic domain, (semaphorin) 5A	3	0	0	2281	0.29	0.04207	0.7091	0.00302374	0.015431	0.0828315	0.624563	0.296266	0.0190069	0.718728	0.117395	0.248961	0.776755	0.457148	0.0106811	0.115593
496	Slc30a6	210148	solute carrier family 30 (zinc transporter), member 6	3	0	0	2789	-0.17	0.06529	0.8199	0.0398877	0.0154144	0.488581	0.624563	-0.140601	0.190668	0.999548	-0.128948	0.248871	1	-0.226323	0.0285911	0.217813
497	Vasn	246154	vasorin	3	0	0	1898	-0.29	0.02783	0.6176	0.17583	0.0154378	1	0.624563	-0.292432	0.2169	0.999548	-0.281641	0.248998	1	-0.298733	0.20983	0.634706
498	Dynlt3	67117	dynein light chain Tctex-type 3	3	0	0	7292	0.01	0.4136	1.114	0.192729	0.0156587	1	0.632228	0.0615046	0.25018	0.999548	0.0556489	0.244856	0.775018	-0.0825148	0.2134	0.639181
499	Arel1	68497	apoptosis resistant E3 ubiquitin protein ligase 1	3	0	0	3952	-0.1	0.1351	0.9995	0.00316962	0.0157648	0.0860076	0.633139	-0.113095	0.0333747	0.900598	-0.0509043	0.250743	0.778345	-0.136924	0.00639802	0.0820192
500	Fbxo17	50760	F-box protein 17	3	0	0	970.3	-0.64	0.005731	0.3778	0.100345	0.0157567	0.794345	0.633139	-1.72418	0.186376	1	0.986261	0.2507	1	-1.17532	0.104994	1
501	Tstd3	77032	thiosulfate sulfurtransferase (rhodanese)-like domain containing 3	3	0	0	3331	-0.13	0.09517	0.9343	0.143387	0.0157757	0.948384	0.633139	-0.117721	0.250801	0.999548	-0.15155	0.150496	0.669825	-0.110672	0.219991	0.644648
502	Rab32	67844	RAB32, member RAS oncogene family	3	0	0	1525	0.42	0.01681	0.4993	7.69e-06	0.0158404	0.000640549	0.633516	0.240672	0.251144	0.999548	0.350748	0.0429229	1	0.670172	4.47e-06	0.000277163
503	Rpl31	114641	ribosomal protein L31	3	0	0	4112	0.09	0.1462	1.006	0.00430134	0.0158481	0.106511	0.633516	-0.499191	0.013525	0.639489	0.503013	0.0229351	1	0.276694	0.251185	0.677219
504	Hsph1	15505	heat shock 105kDa/110kDa protein 1	3	0	0	3051	-0.15	0.07911	0.873	9.38e-07	0.0160063	9.78e-05	0.633741	-0.0913201	0.252017	0.999548	-0.139093	0.00048277	0.0202694	-0.214505	3.77e-05	0.00159592
505	Mtmr7	54384	myotubularin related protein 7	3	0	0	5176	0.08	0.2278	1.046	0.00769892	0.0159288	0.163812	0.633741	0.229683	0.00342478	0.354129	0.0934329	0.186558	0.716258	-0.0902683	0.25161	0.677873
506	Anxa1	16952	annexin A1	3	0	0	5888	0.07	0.2881	1.057	0.0103302	0.0160305	0.200685	0.633741	-0.387826	0.154672	0.999548	-0.489943	0.252144	1	1.07635	0.0059725	0.0778129
507	Tmem87b	72477	transmembrane protein 87B	3	0	0	3439	0.14	0.1017	0.9293	0.0192501	0.0159653	0.313156	0.633741	0.0960386	0.251802	0.999548	0.139246	0.0877038	0.544374	0.189858	0.023438	0.195919
508	Npy1r	18166	neuropeptide Y receptor Y1	3	0	0	5740	0.01	0.2752	1.059	0.0399302	0.0159796	0.488581	0.633741	0.137947	0.12324	0.999548	0.120142	0.251877	1	-0.21972	0.0437692	0.276938
509	Cmtr1	74157	cap methyltransferase 1	3	0	0	7083	-0.02	0.3947	1.105	0.0655271	0.0160429	0.639485	0.633741	0.0698122	0.170578	0.999548	-0.0893053	0.0622727	0.474292	-0.0476456	0.252209	0.678141
510	Man2c1	73744	mannosidase, alpha, class 2C, member 1	3	0	0	3716	-0.11	0.1192	0.9851	0.166181	0.0161118	1	0.635217	-0.112545	0.25257	0.999548	-0.102635	0.175986	0.700106	-0.10349	0.233731	0.660617
511	Gadd45g	23882	growth arrest and DNA-damage-inducible 45 gamma	3	0	0	1257	0.55	0.01067	0.4223	3.3e-07	0.0162081	3.86e-05	0.637761	0.307928	0.253072	0.999548	0.506047	0.0142245	1	0.849875	4.01e-07	3.69e-05
512	2310033P09Rik	67862	RIKEN cDNA 2310033P09 gene	3	0	0	2603	0.21	0.05622	0.8006	0.0704439	0.0162528	0.66436	0.638273	0.170984	0.236477	0.999548	0.189709	0.253305	1	0.277731	0.0494879	0.29709
513	Kdsr	70750	3-ketodihydrosphingosine reductase	3	0	0	2166	0.31	0.03747	0.6899	0.000263097	0.0163497	0.0128207	0.640827	0.221491	0.135461	0.999548	0.164191	0.253807	1	0.545931	7.99e-05	0.00292559
514	Slc45a3	212980	solute carrier family 45, member 3	3	0	0	209.2	1.6	9.25e-05	0.08084	0.0896574	0.0163849	0.750953	0.640957	0.958728	0.213138	1	2.04188	0.0770629	1	1.78441	0.253989	1
515	Gnptg	214505	N-acetylglucosamine-1-phosphotransferase, gamma subunit	3	0	0	2963	0.18	0.07435	0.8455	0.000183769	0.0164902	0.00953185	0.641332	0.103547	0.254532	0.999548	0.204793	0.00624718	0.135989	0.231354	0.00113692	0.0233241
516	Rab3a	19339	RAB3A, member RAS onco family	3	0	0	6817	-0.04	0.3706	1.088	0.0601972	0.0164738	0.61472	0.641332	0.0431192	0.254447	0.999548	-0.0655232	0.0715537	0.506738	-0.0879286	0.130775	0.500731
517	Rasa2	114713	RAS p21 protein activator 2	3	0	0	2969	0.17	0.07464	0.844	0.0728132	0.0164529	0.677176	0.641332	0.13759	0.25434	0.999548	0.207944	0.0724991	1	0.168307	0.168407	0.575595
518	Sec22b	20333	SEC22 homolog B, vesicle trafficking protein	3	0	0	3875	-0.1	0.1298	0.9948	0.00037662	0.0166192	0.0165705	0.643517	-0.0535203	0.255194	0.999548	-0.100177	0.0350576	0.36667	-0.160682	0.000467337	0.0119503
519	Abhd3	106861	abhydrolase domain containing 3	3	0	0	3036	-0.15	0.07826	0.8675	0.00927082	0.0167064	0.185297	0.643517	-0.16733	0.100105	0.999548	-0.0735238	0.255639	0.784526	-0.216878	0.00793744	0.0947231
520	Washc2	28006	WASH complex subunit 2`	3	0	0	6621	-0.03	0.3529	1.074	0.0216922	0.0166772	0.333714	0.643517	0.0956828	0.112266	0.999548	-0.121602	0.0210837	0.278495	-0.0578917	0.255491	0.682715
521	Dmd	13405	dystrophin, muscular dystrophy	3	0	0	6126	0.05	0.3089	1.061	0.0921985	0.0166112	0.76008	0.643517	0.1495	0.080372	0.999548	-0.105137	0.211746	0.747043	0.0924621	0.255153	0.682526
522	Noct	12457	nocturnin	3	0	0	6095	-0.05	0.3061	1.047	0.0941805	0.0166473	0.767919	0.643517	0.0780923	0.255337	0.999548	-0.09808	0.131558	0.640677	-0.125237	0.133279	0.504932
523	Rpl6	19988	ribosomal protein L6	3	0	0	5709	-0.03	0.2726	1.042	0.0756864	0.0168016	0.689858	0.645946	0.179557	0.189269	0.999548	-0.107629	0.0676475	0.492748	-0.173769	0.256124	0.68323
524	Pkm	18746	pyruvate kinase, muscle	3	0	0	3699	-0.12	0.1181	0.9839	0.000160609	0.0171759	0.00843178	0.646758	-0.0495476	0.258012	0.999548	-0.0846311	0.0797825	0.52559	-0.223272	7.51e-05	0.00281296
525	Fkbp1b	14226	FK506 binding protein 1b	3	0	0	5099	0.07	0.2216	1.042	0.0247202	0.0171156	0.363339	0.646758	0.147731	0.0807438	0.999548	0.161715	0.0344898	0.364891	-0.0975731	0.25771	0.684417
526	Prag1	244418	PEAK1 related kinase activating pseudokinase 1	3	0	0	4593	-0.09	0.1816	1.021	0.0298013	0.0170659	0.411025	0.646758	-0.331444	0.0374641	0.927037	-0.111523	0.25746	0.784526	0.167971	0.0952393	0.425019
527	Plcxd2	433022	phosphatidylinositol-specific phospholipase C, X domain containing 2	3	0	0	5105	-0.05	0.222	1.031	0.0538184	0.0169402	0.577135	0.646758	0.200599	0.0318558	0.900598	-0.155742	0.256826	1	-0.196065	0.249333	0.675725
528	Bex3	12070	brain expressed X-linked 3	3	0	0	6512	0.03	0.3431	1.073	0.0620815	0.0170525	0.622801	0.646758	0.0943052	0.071927	0.999548	0.0672022	0.134227	0.645126	-0.0578413	0.257392	0.684104
529	Tent5a	212943	terminal nucleotidyltransferase 5A	3	0	0	1323	0.5	0.01206	0.4441	0.0651348	0.0169809	0.638384	0.646758	0.565174	0.0926791	1	0.431765	0.257032	1	0.503798	0.111526	0.461598
530	Dusp18	75219	dual specificity phosphatase 18	3	0	0	3165	-0.14	0.08551	0.8988	0.0831582	0.0171462	0.726352	0.646758	-0.121671	0.176904	0.999548	-0.153294	0.0821419	0.531166	-0.135111	0.257863	0.684417
531	Tmbim6	110213	transmembrane BAX inhibitor motif containing 6	3	0	0	7587	0.03	0.4404	1.131	0.085569	0.0171783	0.735395	0.646758	-0.0518621	0.258024	0.999548	0.0436138	0.204218	0.734811	0.0862343	0.0740646	0.372742
532	Ostf1	20409	osteoclast stimulating factor 1	3	0	0	3604	0.14	0.112	0.9603	0.119713	0.0168831	0.872584	0.646758	0.0864784	0.256538	0.999548	0.0927492	0.167245	0.690297	0.246362	0.147943	0.534593
533	AW549877	106064	expressed sequence AW549877	3	0	0	6313	0.05	0.3254	1.065	0.120573	0.0170385	0.875535	0.646758	0.0956938	0.224583	0.999548	-0.0774193	0.257322	0.784526	0.126255	0.111001	0.460319
534	Washc4	319277	WASH complex subunit 4	3	0	0	3672	0.12	0.1164	0.97	0.140144	0.01695	0.93994	0.646758	0.109451	0.161171	0.999548	0.117815	0.256876	0.784526	0.142036	0.193785	0.613657
535	Dlx2	13392	distal-less homeobox 2	3	0	0	3716	-0.08	0.1192	0.985	0.165031	0.0172087	1	0.646758	-0.311927	0.256617	1	-0.37724	0.258176	1	0.451701	0.155151	0.548694
536	Gpx1	14775	glutathione peroxidase 1	3	0	0	3333	-0.13	0.09527	0.9349	0.0309283	0.0173484	0.421181	0.646967	-0.136426	0.160303	0.999548	-0.157343	0.0232554	0.297811	-0.0845337	0.258873	0.685271
537	Hspb8	80888	heat shock protein 8	3	0	0	2714	-0.18	0.06156	0.8074	0.0371234	0.017375	0.469215	0.646967	-0.178866	0.241224	0.999548	-0.24478	0.019714	1	-0.117553	0.259005	0.685271
538	Ryr1	20190	ryanodine receptor 1, skeletal muscle	3	0	0	354.1	-1.23	0.0004147	0.1774	0.0442021	0.0172566	0.519749	0.646967	-0.970681	0.258415	1	-1.81237	0.0543817	1	-0.907229	0.110933	1
539	Prickle2	243548	prickle planar cell polarity protein 2	3	0	0	5704	0.05	0.2721	1.058	0.0497507	0.0173752	0.55359	0.646967	0.170258	0.0346618	0.912285	0.079302	0.204005	0.734811	-0.0931789	0.259006	0.685271
540	Slc38a1	105727	solute carrier family 38, member 1	3	0	0	3948	0.11	0.1347	0.9979	0.124132	0.0173294	0.885313	0.646967	0.0813826	0.258778	0.999548	0.117134	0.176211	0.700106	0.130661	0.146852	0.532158
541	Dpf1	29861	D4, zinc and double PHD fingers family 1	3	0	0	5147	-0.08	0.2255	1.032	0.0137547	0.017497	0.246187	0.650298	-0.11023	0.0734129	0.999548	0.0566529	0.25961	0.785056	-0.199367	0.0176027	0.161045
542	Plcd1	18799	phospholipase C, delta 1	3	0	0	4412	0.13	0.168	1.025	0.00425687	0.0176307	0.105932	0.652856	-0.209778	0.257643	0.999548	0.20182	0.260269	1	0.413041	0.00114715	0.0234963
543	Fzd5	14367	frizzled class receptor 5	3	0	0	1145	-0.44	0.008553	0.4236	0.0808804	0.0176065	0.714271	0.652856	-1.7542	0.164385	1	-1.01853	0.26015	1	1.45723	0.0842314	1
544	Prex1	277360	phosphatidylinositol-3,4,5-trisphosphate-dependent Rac exchange factor 1	3	0	0	3345	-0.13	0.09596	0.9375	0.00430881	0.0177872	0.106565	0.653832	-0.119242	0.261037	0.999548	-0.155669	0.00197464	0.0592189	-0.10307	0.151485	0.541423
545	Dph6	66632	diphthamine biosynthesis 6	3	0	0	3762	-0.06	0.1222	0.9891	0.0512677	0.0177075	0.562685	0.653832	0.560875	0.0507352	1	-0.408	0.144311	1	-0.335037	0.260647	0.686483
546	Ganc	76051	glucosidase, alpha; neutral C	3	0	0	4182	0.11	0.1512	1.014	0.15982	0.0177492	0.987086	0.653832	0.312297	0.171079	0.999548	0.220454	0.21931	1	-0.197304	0.260851	0.686702
547	Slc7a4	224022	solute carrier family 7 (cationic amino acid transporter, y+ system), member 4	3	0	0	6482	0.02	0.3405	1.071	0.184744	0.0177819	1	0.653832	0.0939762	0.241366	0.999548	0.0863411	0.261011	0.785093	-0.130627	0.194228	0.613902
548	Maoa	17161	monoamine oxidase A	3	0	0	3609	-0.11	0.1123	0.9813	0.0899205	0.0178339	0.752406	0.654354	-0.104183	0.261265	0.999548	-0.132247	0.0782827	0.520332	-0.0979139	0.204831	0.629124
549	Paqr8	74229	progestin and adipoQ receptor family member VIII	3	0	0	2879	0.2	0.06989	0.8329	3.24e-06	0.0179036	0.000298589	0.655266	0.108223	0.261605	0.999548	0.151093	0.0119752	0.207314	0.341942	5.82e-06	0.000343952
550	Rrp1b	72462	ribosomal RNA processing 1 homolog B (S. cerevisiae)	3	0	0	5420	0.08	0.2481	1.057	0.0614045	0.0179239	0.619499	0.655266	-0.16923	0.211885	0.999548	0.11951	0.261704	1	0.279761	0.0441373	0.278051
551	Cep120	225523	centrosomal protein 120	3	0	0	3601	0.14	0.1118	0.9598	0.0211708	0.0181232	0.329248	0.66135	0.0929119	0.209721	0.999548	0.0973237	0.262671	0.785533	0.224813	0.0106347	0.115188
552	Fat3	270120	FAT atypical cadherin 3	3	0	0	2163	0.29	0.03736	0.6885	0.0137604	0.0183094	0.246187	0.666931	0.366963	0.0114486	0.602156	0.25877	0.11124	1	0.235036	0.263567	0.689167
553	Mcrip2	68241	MAPK regulated corepressor interacting protein 2	3	0	0	2024	-0.26	0.03219	0.6447	0.0290852	0.0185652	0.404716	0.673604	-0.202974	0.264789	0.999548	-0.237344	0.126584	1	-0.350789	0.0265371	0.209494
554	Knl1	76464	kinetochore scaffold 1	3	0	0	2589	0.38	0.05559	0.795	0.137221	0.0185613	0.93063	0.673604	0.3242	0.26477	0.999548	-0.335614	0.200647	1	1.1432	0.146323	0.531144
555	Cmss1	66497	cms small ribosomal subunit 1	3	0	0	3298	0.15	0.09318	0.9144	0.197378	0.0185931	1	0.673604	0.125564	0.264921	0.999548	0.141089	0.252679	1	0.175501	0.202735	0.626734
556	Ldb2	16826	LIM domain binding 2	3	0	0	3185	-0.15	0.08662	0.9034	0.0023759	0.0186592	0.0698425	0.674784	-0.15131	0.015321	0.686283	-0.0535614	0.265235	0.788526	-0.233904	0.00927011	0.104851
557	Gabra5	110886	gamma-aminobutyric acid (GABA) A receptor, subunit alpha 5	3	0	0	4686	0.08	0.1888	1.04	0.0351803	0.0186982	0.453442	0.674983	0.0509365	0.26542	0.999548	0.0744615	0.0638091	0.480183	0.118098	0.0676669	0.352931
558	Rasl11b	68939	RAS-like, family 11, member B	3	0	0	3387	0.15	0.0985	0.9242	0.0705764	0.0187751	0.66512	0.675991	0.0972386	0.210717	0.999548	0.134618	0.265783	0.789027	0.210644	0.0530698	0.309524
559	Syn3	27204	synapsin III	3	0	0	5155	0.08	0.2261	1.045	0.171268	0.0187934	1	0.675991	0.175481	0.236142	0.999548	-0.138491	0.265869	1	0.210467	0.173325	0.583426
560	Ddx41	72935	DEAD (Asp-Glu-Ala-Asp) box polypeptide 41	3	0	0	3026	0.18	0.07771	0.8548	0.000449348	0.0188579	0.0190212	0.676358	0.0807991	0.266173	0.999548	0.191266	0.0234514	0.298658	0.279227	0.000824389	0.0183883
561	Frmd6	319710	FERM domain containing 6	3	0	0	2060	0.31	0.03351	0.6771	0.0144803	0.0189613	0.254507	0.676358	0.23628	0.266659	0.999548	0.218141	0.242122	1	0.488789	0.00555035	0.0745941
562	Cdkn3	72391	cyclin-dependent kinase inhibitor 3	3	0	0	3068	-0.23	0.08007	0.8754	0.0205653	0.019004	0.324319	0.676358	-0.232919	0.0840007	0.999548	0.153947	0.266859	1	-0.612318	0.0251641	0.203532
563	Tbc1d12	209478	TBC1D12: TBC1 domain family, member 12	3	0	0	669.2	-0.86	0.002281	0.2651	0.125757	0.0189436	0.889724	0.676358	-2.49197	0.119164	1	1.02057	0.266576	1	-1.10778	0.2149	1
564	Asic4	241118	acid-sensing (proton-gated) ion channel family member 4	3	0	0	3990	-0.13	0.1376	1.002	0.155373	0.0190054	0.979954	0.676358	-0.286218	0.185105	0.999548	0.21475	0.266866	1	-0.3138	0.18979	0.607465
565	Prkaa1	105787	protein kinase, AMP-activated, alpha 1 catalytic subunit	3	0	0	5805	0.06	0.2808	1.056	0.156079	0.0189765	0.981324	0.676358	-0.143539	0.171953	0.999548	0.127647	0.26673	1	0.189306	0.205823	0.629798
566	Klc1	16593	kinesin light chain 1	3	0	0	5114	-0.06	0.2227	1.032	0.0113758	0.0190898	0.215582	0.676964	-0.0370022	0.26726	0.999548	-0.045848	0.0688629	0.497268	-0.0943392	0.0143045	0.140527
567	Slc24a3	94249	solute carrier family 24 (sodium/potassium/calcium exchanger), member 3	3	0	0	7419	0.01	0.4252	1.121	0.0684632	0.0190734	0.654451	0.676964	-0.12323	0.102969	0.999548	0.0800248	0.103528	0.58387	0.0719181	0.267183	0.693515
568	Mustn1	66175	musculoskeletal, embryonic nuclear protein 1	3	0	0	1526	0.45	0.01684	0.4994	1.85e-05	0.0192467	0.00132076	0.677745	0.3891	0.26799	1	0.735446	5.2e-06	1	0.219459	0.0932573	0.421729
569	Ahcyl1	229709	S-adenosylhomocysteine hydrolase-like 1	3	0	0	6721	-0.04	0.3619	1.081	0.0028472	0.0192028	0.0798425	0.677745	0.0488045	0.267786	0.999548	-0.0423281	0.248149	0.775863	-0.131884	0.000706707	0.0163843
570	Adamtsl2	77794	ADAMTS-like 2	3	0	0	1921	0.36	0.02861	0.6314	0.0127615	0.0192377	0.233397	0.677745	0.261098	0.267948	0.999548	0.543762	0.0052024	1	0.274831	0.218663	0.644048
571	Sccpdh	109232	saccharopine dehydrogenase (putative)	3	0	0	891.5	-0.73	0.00466	0.3576	0.0643109	0.0191688	0.635617	0.677745	-5.63628	0.0699053	0.999548	3.15788	0.267628	1	0.291712	0.139508	0.517428
572	Hk1	15275	hexokinase 1	3	0	0	4243	-0.09	0.1555	1.018	0.000263339	0.0195076	0.0128207	0.67977	-0.0548089	0.269196	0.999548	-0.0847203	0.00394055	0.0981465	-0.122936	0.00259198	0.0432482
573	Psph	100678	phosphoserine phosphatase	3	0	0	4604	-0.08	0.1825	1.023	0.00864426	0.0196622	0.177177	0.67977	-0.172768	0.0505431	0.985084	-0.178733	0.0136318	0.220834	0.119072	0.269905	0.696619
574	Pdap1	231887	PDGFA associated protein 1	3	0	0	6033	0.04	0.3007	1.061	0.0196333	0.0193803	0.315813	0.67977	-0.143532	0.0569593	0.999548	0.15513	0.0347088	0.36497	0.12254	0.268609	0.695259
575	Ccdc85c	668158	coiled-coil domain containing 85C	3	0	0	4505	-0.09	0.1749	1.022	0.0536471	0.0195696	0.57657	0.67977	-0.165607	0.26948	0.999548	0.166891	0.225541	1	-0.282152	0.0334157	0.236481
576	Emilin1	100952	elastin microfibril interfacer 1	3	0	0	4040	-0.13	0.1411	1.001	0.0594289	0.019493	0.610596	0.67977	-0.30759	0.144783	0.999548	0.187153	0.269128	1	-0.276048	0.0600275	0.329275
577	Ruvbl1	56505	RuvB-like protein 1	3	0	0	3144	-0.09	0.08429	0.8934	0.0707338	0.0195813	0.665845	0.67977	-1.12702	0.269534	1	1.01006	0.263493	1	-0.149619	0.0419806	0.268546
578	Lrrc14	223664	leucine rich repeat containing 14	3	0	0	4842	0.06	0.2009	1.044	0.0820464	0.0196202	0.719767	0.67977	0.203977	0.10243	0.999548	0.172374	0.269713	1	-0.203577	0.133063	0.504802
579	Sft2d2	108735	SFT2 domain containing 2	3	0	0	4168	-0.08	0.1502	1.011	0.0877869	0.019676	0.743638	0.67977	-0.305333	0.184836	0.999548	-0.197549	0.269968	1	0.254624	0.0811199	0.392279
580	Elk4	13714	ELK4, member of ETS oncogene family	3	0	0	4900	0.1	0.2056	1.042	0.099454	0.0194843	0.789468	0.67977	0.173515	0.180633	0.999548	-0.134609	0.269089	1	0.265732	0.0996359	0.43492
581	Trib2	217410	tribbles pseudokinase 2	3	0	0	6792	-0.01	0.3683	1.085	0.138518	0.0194905	0.935241	0.67977	-0.0799354	0.269117	0.999548	-0.0512436	0.235575	0.766302	0.0878954	0.124356	0.488272
582	mt-Cytb	17711	mitochondrially encoded cytochrome b	3	0	0	3616	0.13	0.1128	0.9615	0.19256	0.0194895	1	0.67977	0.118533	0.269112	0.999548	0.105101	0.224042	0.759902	0.158346	0.21652	0.64136
583	Strip2	320609	striatin interacting protein 2	3	0	0	4317	0.08	0.161	1.019	0.160569	0.0197218	0.988841	0.680182	0.283803	0.222094	0.999548	0.216786	0.270177	1	-0.25715	0.164272	0.566223
584	Cs	12974	citrate synthase	3	0	0	4693	-0.08	0.1893	1.025	0.00300709	0.0197956	0.0828315	0.68076	-0.0398623	0.270514	0.999548	-0.0472808	0.171913	0.694785	-0.13912	0.00107951	0.0225814
585	Ccnyl1	227210	cyclin Y-like 1	3	0	0	2573	-0.2	0.05481	0.7783	0.0249314	0.0198063	0.364845	0.68076	-0.142358	0.211527	0.999548	-0.114444	0.270563	1	-0.343709	0.0126811	0.129256
586	Emp2	13731	epithelial membrane protein 2	3	0	0	3768	-0.16	0.1226	0.989	0.00861629	0.0199864	0.177177	0.682286	0.207871	0.27138	0.999548	-0.293131	0.05053	1	-0.389183	0.013506	0.135071
587	Col16a1	107581	collagen, type XVI, alpha 1	3	0	0	4871	0.08	0.2032	1.045	0.0626378	0.0199056	0.624422	0.682286	-0.245965	0.271014	0.999548	0.30313	0.0730207	1	0.188315	0.127138	0.491813
588	Acadm	11364	acyl-Coenzyme A dehydrogenase, medium chain	3	0	0	4162	-0.12	0.1497	1.01	0.0896175	0.0199667	0.750953	0.682286	-0.30222	0.100508	0.999548	-0.173021	0.152901	1	0.124108	0.271291	0.697305
589	Trappc6b	78232	trafficking protein particle complex 6B	3	0	0	7010	0.03	0.3881	1.1	0.150154	0.0199548	0.964887	0.682286	-0.107723	0.180908	0.999548	0.0795937	0.271237	0.7968	0.10359	0.181416	0.595326
590	Slit2	20563	slit guidance ligand 2	3	0	0	2876	0.18	0.06972	0.835	0.0739938	0.0200384	0.683721	0.682903	0.163913	0.242285	0.999548	0.238214	0.0482677	1	0.143979	0.271616	0.697533
591	Pacsin2	23970	protein kinase C and casein kinase substrate in neurons 2	3	0	0	2918	-0.16	0.07193	0.8389	0.00491019	0.0201503	0.118522	0.685553	-0.193032	0.0576311	0.999548	-0.219707	0.00585161	0.129341	-0.0791746	0.27212	0.69808
592	Evc	59056	EvC ciliary complex subunit 1	3	0	0	5135	-0.03	0.2245	1.03	0.193507	0.0202138	1	0.686552	0.269853	0.272406	0.999548	-0.203559	0.186446	1	-0.159622	0.259021	0.685271
593	Hsd17b10	15108	hydroxysteroid (17-beta) dehydrogenase 10	3	0	0	3523	-0.12	0.1069	0.9673	0.0510204	0.0202899	0.561504	0.687974	-0.0994653	0.272747	0.999548	-0.0854073	0.211302	0.746414	-0.173156	0.0328942	0.234278
594	Crem	12916	cAMP responsive element modulator	3	0	0	1653	0.4	0.02027	0.5427	1.42e-09	0.0206765	2.68e-07	0.69162	0.171176	0.274469	0.999548	0.354635	0.029519	1	0.658962	4.72e-10	9.57e-08
595	Sox8	20681	SRY (sex determining region Y)-box 8	3	0	0	2943	0.19	0.07329	0.8459	5.58e-05	0.0206086	0.003418	0.69162	0.0910742	0.262109	0.999548	0.182571	6.35e-06	0.000654874	0.304023	0.274168	0.699702
596	Usp20	74270	ubiquitin specific peptidase 20	3	0	0	3520	-0.12	0.1067	0.9677	0.00121173	0.0206266	0.0421526	0.69162	-0.0728027	0.274248	0.999548	-0.0918511	0.121555	0.625467	-0.206689	0.000501432	0.0125697
597	Sdhaf3	71238	succinate dehydrogenase complex assembly factor 3	3	0	0	1726	-0.35	0.02239	0.5909	0.0652012	0.0206943	0.638578	0.69162	-0.25662	0.274547	0.999548	-0.461367	0.0565014	1	-0.333937	0.171509	0.580061
598	Nfam1	74039	Nfat activating molecule with ITAM motif 1	3	0	0	4413	0.09	0.168	1.025	0.0692851	0.020707	0.658946	0.69162	0.24704	0.274603	0.999548	0.210004	0.102251	1	-0.180398	0.103148	0.442328
599	Plaur	18793	plasminogen activator, urokinase receptor	3	0	0	685.7	0.86	0.002427	0.244	0.103773	0.020509	0.808141	0.69162	0.880735	0.273725	1	1.01246	0.114349	1	0.692724	0.164552	1
600	Fbxo38	107035	F-box protein 38	3	0	0	3703	0.12	0.1184	0.9736	0.143329	0.020496	0.948308	0.69162	0.140276	0.17922	0.999548	0.118645	0.169193	0.693527	0.0970983	0.273667	0.698699
601	Acrbp	54137	proacrosin binding protein	3	0	0	308.1	1.32	0.0002807	0.1026	0.173114	0.020664	1	0.69162	1.5652	0.172577	1	1.17166	0.274413	1	1.22782	0.23361	1
602	Nono	53610	non-POU-domain-containing, octamer binding protein	3	0	0	7955	0.02	0.4737	1.135	0.17437	0.0206681	1	0.69162	-0.0388137	0.255647	0.999548	0.0394122	0.274431	0.799958	0.0559478	0.15946	0.556695
603	Rgs13	246709	regulator of G-protein signaling 13	3	0	0	1823	0.37	0.02539	0.6036	0.1155	0.0207605	0.85444	0.692258	0.461508	0.121659	1	0.282723	0.27484	1	0.368115	0.180093	0.593812
604	Cdh20	23836	cadherin 20	3	0	0	2209	0.3	0.03917	0.6964	0.000290813	0.0209338	0.0135986	0.696026	0.258439	0.0772201	0.999548	0.141254	0.275602	1	0.512977	0.00014509	0.00462441
605	Tubb6	67951	tubulin, beta 6 class V	3	0	0	4771	-0.03	0.1953	1.027	0.0172338	0.0209773	0.289974	0.696026	-0.158452	0.275793	0.999548	-0.192124	0.119018	0.619463	0.261126	0.0136621	0.1361
606	Cnot7	18983	CCR4-NOT transcription complex, subunit 7	3	0	0	4916	0.07	0.2068	1.043	0.11254	0.0209493	0.843398	0.696026	0.0902979	0.0818331	0.999548	0.0557753	0.27567	0.799958	0.0616601	0.256964	0.683937
607	Mettl22	239706	methyltransferase like 22	3	0	0	2922	0.18	0.07214	0.8414	0.0310243	0.0210951	0.42206	0.698779	0.110264	0.276308	0.999548	0.239552	0.0416821	1	0.199817	0.0841391	0.400366
608	Fxyd7	57780	FXYD domain-containing ion transport regulator 7	3	0	0	3259	0.15	0.09088	0.9024	0.0591822	0.0211604	0.610244	0.69979	0.142831	0.276593	0.999548	0.155984	0.0750113	0.516889	0.143214	0.112088	0.462893
609	Pebp1	23980	phosphatidylethanolamine binding protein 1	3	0	0	4747	-0.07	0.1935	1.025	0.0171846	0.0212207	0.289631	0.70063	-0.0596847	0.276855	0.999548	-0.0396429	0.225162	0.759902	-0.113591	0.00716739	0.0880831
610	Cttnbp2nl	80281	CTTNBP2 N-terminal like	3	0	0	5319	0.1	0.2397	1.056	0.0021978	0.0213664	0.0662536	0.702837	-0.0948197	0.277488	0.999548	0.118469	0.234189	0.765182	0.278216	0.000527342	0.0131128
611	Tnpo2	212999	transportin 2 (importin 3, karyopherin beta 2b)	3	0	0	6609	-0.03	0.3518	1.073	0.0586274	0.0214158	0.607088	0.702837	0.0789413	0.153901	0.999548	-0.103772	0.0537092	0.448783	-0.0715696	0.277701	0.704213
612	Syap1	67043	synapse associated protein 1	3	0	0	6182	0.05	0.3138	1.061	0.0745762	0.0214159	0.686848	0.702837	-0.110086	0.199905	0.999548	0.0917681	0.277702	0.800486	0.18023	0.0578537	0.323459
613	Plekhg2	101497	pleckstrin homology domain containing, family G (with RhoGef domain) member 2	3	0	0	7634	-0.01	0.4447	1.127	0.090112	0.0214273	0.753695	0.702837	-0.431769	0.0567172	0.999548	0.222045	0.266745	1	0.187036	0.277751	0.704213
614	Rnf19a	30945	ring finger protein 19A	3	0	0	4563	0.08	0.1793	1.036	0.199788	0.0214661	1	0.702963	0.0818326	0.18552	0.999548	0.0750022	0.277919	0.800486	0.0891062	0.268291	0.69512
615	Shroom1	71774	shroom family member 1	3	0	0	1411	-0.55	0.01403	0.489	0.0330304	0.0220207	0.43685	0.716422	-1.14257	0.280292	1	0.673184	0.209854	1	-1.16967	0.0179085	0.162522
616	Phactr1	218194	phosphatase and actin regulator 1	3	0	0	6706	-0.01	0.3606	1.08	0.0558585	0.0220467	0.589075	0.716422	0.160786	0.0503502	0.985084	-0.0694749	0.280402	0.800486	-0.125149	0.152079	0.543092
617	Tonsl	72749	tonsoku-like, DNA repair protein	3	0	0	2355	0.24	0.04516	0.73	0.238987	0.0220069	1	0.716422	0.217475	0.280233	0.999548	0.241023	0.23956	1	0.270061	0.274475	0.699933
618	Hibadh	58875	3-hydroxyisobutyrate dehydrogenase	3	0	0	4379	-0.08	0.1655	1.021	0.165766	0.0219427	1	0.716422	-0.102766	0.150909	0.999548	-0.0662754	0.244962	0.775018	-0.0683153	0.279961	0.706312
619	Drg1	13494	developmentally regulated GTP binding protein 1	3	0	0	4720	-0.07	0.1914	1.026	0.19766	0.0220909	1	0.716422	-0.0737506	0.225357	0.999548	-0.059966	0.280589	0.800486	-0.0698148	0.215103	0.640961
620	Gna13	14674	guanine nucleotide binding protein, alpha 13	3	0	0	5846	-0.04	0.2844	1.043	0.169196	0.0220793	1	0.716422	-0.0797823	0.271634	0.999548	-0.121893	0.140149	0.652838	0.0936291	0.28054	0.707133
621	Has2	15117	hyaluronan synthase 2	3	33.3333	0	614.2	0.98	0.00183	0.2244	0.000216941	0.0223036	0.0109051	0.71669	0.84065	0.0103567	1	0.508771	0.281487	1	1.57772	0.000752245	0.0171686
622	Dusp14	56405	dual specificity phosphatase 14	3	0	0	2531	0.23	0.05287	0.7738	0.00127185	0.0222728	0.0435657	0.71669	0.144095	0.281357	0.999548	0.291703	0.0225427	1	0.245716	0.00279304	0.045475
623	Smarca5	93762	SWI/SNF related, matrix associated, actin dependent regulator of chromatin, subfamily a, member 5	3	0	0	4400	-0.12	0.167	1.021	0.0030077	0.0222851	0.0828315	0.71669	0.88497	0.281409	1	-1.44172	0.0626422	1	0.208521	0.00284859	0.0462268
624	Nr1d2	353187	nuclear receptor subfamily 1, group D, member 2	3	0	0	3389	0.15	0.0986	0.9243	0.0102466	0.0221951	0.199479	0.71669	0.0980343	0.28103	0.999548	0.114329	0.1276	0.635354	0.240713	0.00642903	0.0822517
625	Mdga2	320772	MAM domain containing glycosylphosphatidylinositol anchor 2	3	0	0	3310	0.15	0.09387	0.9145	0.0156117	0.0223487	0.268755	0.71669	0.168609	0.0288688	0.858615	0.0819878	0.281676	0.800486	0.212042	0.0485446	0.294582
626	Rnft2	269695	ring finger protein, transmembrane 2	3	0	0	2821	-0.17	0.06691	0.8233	0.0610572	0.0222705	0.617519	0.71669	-0.120911	0.231124	0.999548	-0.130857	0.281348	0.800486	-0.244218	0.0373431	0.251892
627	Ranbp6	240614	RAN binding protein 6	3	0	0	6402	-0.04	0.3333	1.056	0.12237	0.02232	0.88142	0.71669	-0.0728214	0.180957	0.999548	0.0787215	0.281556	0.800486	-0.121954	0.128684	0.496005
628	Hectd2	226098	HECT domain E3 ubiquitin protein ligase 2	3	0	0	4731	0.13	0.1923	1.043	0.00124304	0.0226864	0.0427975	0.717578	0.16333	0.065415	0.999548	-0.0988177	0.283088	0.801108	0.311653	0.000930697	0.0201614
629	Ssfa2	70599	sperm specific antigen 2	3	0	0	2506	0.23	0.05178	0.7706	0.0143915	0.0226875	0.253584	0.717578	0.173057	0.283093	0.999548	0.314256	0.0250679	1	0.203639	0.0500992	0.298872
630	Kcnip4	80334	Kv channel interacting protein 4	3	0	0	5436	0.04	0.2494	1.057	0.0272645	0.0225795	0.3877	0.717578	0.180333	0.0558066	0.999548	0.113347	0.282643	1	-0.178425	0.0517686	0.305631
631	Atp1b3	11933	ATPase, Na+/K+ transporting, beta 3 polypeptide	3	0	0	7114	0.03	0.3974	1.105	0.0631971	0.0224951	0.628439	0.717578	-0.0653639	0.28229	0.999548	0.0784845	0.127134	0.635354	0.082169	0.0709781	0.363014
632	Cenpq	83815	centromere protein Q	3	0	0	2086	0.29	0.03445	0.6778	0.0736268	0.0226976	0.682533	0.717578	0.982213	0.0423764	1	0.606881	0.262894	1	-0.732993	0.283135	1
633	Cox7a1	12865	cytochrome c oxidase subunit 7A1	3	0	0	1065	0.57	0.007187	0.3603	0.0981099	0.0224572	0.78406	0.717578	0.545323	0.149456	1	0.699583	0.112618	1	0.469008	0.282132	0.709269
634	Kdm6b	216850	KDM1 lysine (K)-specific demethylase 6B	3	0	0	1517	0.41	0.01662	0.4979	0.0984475	0.0226173	0.785493	0.717578	0.582273	0.0642131	1	0.290985	0.2828	1	0.372227	0.262797	0.688379
635	Glra2	237213	glycine receptor, alpha 2 subunit	3	0	0	3368	0.15	0.09737	0.9205	0.107014	0.0225391	0.82206	0.717578	0.0829691	0.282474	0.999548	0.156399	0.140348	0.652838	0.211661	0.135859	0.509385
636	Rtcb	28088	RNA 2',3'-cyclic phosphate and 5'-OH ligase	3	0	0	4914	-0.06	0.2067	1.03	0.188315	0.0226578	1	0.717578	-0.0606181	0.243616	0.999548	-0.0693059	0.182882	0.70909	-0.0533229	0.282969	0.710062
637	Cav1	12389	caveolin 1, caveolae protein	3	0	0	3057	0.29	0.07946	0.858	0.00027359	0.0228951	0.0130978	0.722689	-0.169774	0.283954	0.999548	0.397643	0.011736	1	0.640398	0.000862727	0.0190112
638	Npy	109648	neuropeptide Y	3	0	0	2315	-0.47	0.04345	0.7161	3.76e-05	0.0229657	0.00243618	0.723779	-2.48364	0.284245	1	0.437694	0.000214608	0.0113646	0.630598	0.00476075	0.0666453
639	Aco2	11429	aconitase 2, mitochondrial	3	0	0	5946	-0.06	0.2931	1.04	1.68e-05	0.0231255	0.00120802	0.727676	0.0292803	0.284903	0.999548	-0.0847383	0.00040428	0.0176027	-0.133384	0.00100724	0.0214918
640	Prkacb	18749	protein kinase, cAMP dependent, catalytic, beta	3	0	0	6281	-0.05	0.3225	1.053	0.0435465	0.0231657	0.515578	0.7278	0.064319	0.285068	0.999548	-0.0833383	0.157128	0.680116	-0.119894	0.0341057	0.23964
641	Elk1	13712	ELK1, member of ETS oncogene family	3	0	0	5604	0.05	0.2636	1.059	0.0646285	0.0232755	0.636193	0.728972	0.109319	0.285518	0.999548	0.147975	0.0697769	0.500181	-0.119001	0.13191	0.50259
642	Cabp4	73660	calcium binding protein 4	3	0	0	991.6	0.48	0.006041	0.3374	0.205722	0.0232518	1	0.728972	1.48886	0.273744	1	-1.76487	0.185426	1	1.71431	0.285421	1
643	Nudt3	56409	nudix (nucleotide diphosphate linked moiety X)-type motif 3	3	0	0	6494	-0.04	0.3415	1.064	0.0619167	0.0233122	0.622479	0.728988	-0.117706	0.0325038	0.900598	0.0450473	0.285668	0.802272	-0.0458015	0.266643	0.693057
644	C1qtnf5	235312	C1q and tumor necrosis factor related protein 5	3	0	0	2516	-0.21	0.05223	0.766	0.00236884	0.0233593	0.0697368	0.729324	-0.144376	0.28586	0.999548	-0.328426	0.00129387	0.0429682	-0.157526	0.101482	0.438852
645	Abhd8	64296	abhydrolase domain containing 8	3	0	0	4116	-0.1	0.1465	1.007	0.00285122	0.0234759	0.0798425	0.730696	-0.0620566	0.286335	0.999548	-0.057693	0.138782	0.652087	-0.169915	0.00118381	0.0238968
646	Rassf5	54354	Ras association (RalGDS/AF-6) domain family member 5	3	0	0	4624	0.14	0.184	1.039	0.0288968	0.0234621	0.403168	0.730696	0.458236	0.0175405	0.714103	-0.173846	0.175615	1	0.143473	0.286279	0.712732
647	Apaf1	11783	apoptotic peptidase activating factor 1	3	0	0	5894	0.06	0.2885	1.057	0.13372	0.0235197	0.917427	0.730928	0.0971329	0.281559	0.999548	-0.0807041	0.286513	0.803877	0.178924	0.0927113	0.420802
648	Spidr	224008	scaffolding protein involved in DNA repair	3	0	0	4459	0.02	0.1715	1.028	0.0324779	0.0235986	0.434447	0.731843	-0.538357	0.0444344	0.956359	0.269819	0.286833	1	0.332457	0.0808109	0.391525
649	Tarsl2	272396	threonyl-tRNA synthetase-like 2	3	0	0	2554	-0.19	0.05396	0.775	0.0398736	0.0236219	0.488581	0.731843	-0.123378	0.286927	0.999548	-0.162529	0.123108	1	-0.289911	0.0383901	0.255954
650	S100a11	20195	S100 calcium binding protein A11	3	33.3333	0	1524	0.16	0.01681	0.4999	0.00659787	0.0237754	0.144987	0.73469	-1.20246	0.287547	1	-1.55404	0.25956	1	3.23035	0.00177544	0.0325099
651	Ankrd40	71452	ankyrin repeat domain 40	3	0	0	6300	-0.04	0.3242	1.053	0.037507	0.0237869	0.471066	0.73469	0.0930649	0.204442	0.999548	-0.0708182	0.287594	0.80614	-0.146596	0.0212398	0.18277
652	Fam120c	207375	family with sequence similarity 120, member C	3	0	0	6763	-0.02	0.3656	1.083	0.155912	0.0238262	0.980808	0.734774	0.129435	0.125872	0.999548	-0.0844595	0.260211	0.785056	-0.0938701	0.287752	0.714902
653	Plekhb1	27276	pleckstrin homology domain containing, family B (evectins) member 1	3	0	0	1159	-0.47	0.008796	0.4221	1.16e-11	0.0239752	3.27e-09	0.737108	-0.660709	0.00554432	0.451047	-0.167321	0.28835	1	-0.579553	1.37e-11	3.51e-09
654	Uso1	56041	USO1 vesicle docking factor	3	0	0	4621	-0.07	0.1837	1.025	0.10138	0.0239627	0.798137	0.737108	-0.102216	0.099479	0.999548	-0.0593034	0.173613	0.696145	-0.0486671	0.2883	0.715766
655	Ak5	229949	adenylate kinase 5	3	0	0	5441	-0.09	0.2498	1.041	0.00280275	0.0240354	0.078818	0.737832	0.0755536	0.20632	0.999548	-0.0510302	0.288592	0.807013	-0.297516	0.000773703	0.0175332
656	Baiap2	108100	brain-specific angiogenesis inhibitor 1-associated protein 2	3	0	0	6343	-0.04	0.3281	1.053	0.14644	0.024132	0.955641	0.739669	-0.0968836	0.288978	0.999548	0.078454	0.225333	0.759902	-0.0952445	0.13163	0.502299
657	Slc2a1	20525	solute carrier family 2 (facilitated glucose transporter), member 1	3	0	0	5815	-0.01	0.2817	1.043	0.0749123	0.0243023	0.687858	0.743752	-0.113209	0.237574	0.999548	-0.102929	0.289656	0.8073	0.175257	0.0469681	0.289022
658	Foxo6	329934	forkhead box O6	3	0	0	2824	-0.16	0.06707	0.8248	0.0497874	0.0243527	0.553692	0.744164	-0.14383	0.289856	0.999548	-0.191534	0.0543014	1	-0.152646	0.116479	0.472908
659	Itch	16396	itchy, E3 ubiquitin protein ligase	3	0	0	6007	-0.05	0.2984	1.041	0.115301	0.0244781	0.854325	0.746862	0.100922	0.243746	0.999548	-0.110092	0.290353	0.807903	-0.126708	0.0848705	0.401901
660	Vps41	218035	VPS41 HOPS complex subunit	3	0	0	4988	-0.06	0.2126	1.032	0.0836191	0.0245229	0.728172	0.747095	-0.0564594	0.218985	0.999548	-0.0385963	0.29053	0.807903	-0.0910739	0.059361	0.326741
661	Mfge8	17304	milk fat globule-EGF factor 8 protein	3	0	0	2859	-0.18	0.06888	0.8303	0.00448146	0.0246996	0.110157	0.750204	-0.0915529	0.291226	0.999548	-0.106355	0.0376581	0.37861	-0.348093	0.00747368	0.0905414
662	Fam117a	215512	family with sequence similarity 117, member A	3	0	0	902.2	-0.63	0.004799	0.3587	0.0360175	0.0246698	0.461571	0.750204	-0.478004	0.291109	1	-0.779049	0.0523915	1	-0.634492	0.0775466	0.383562
663	Arhgap26	71302	Rho GTPase activating protein 26	3	0	0	2476	-0.19	0.05042	0.7549	0.106023	0.0247792	0.817412	0.751485	-0.198556	0.291538	0.999548	-0.187902	0.23334	1	-0.197348	0.0781099	0.384418
664	Hmgcl	15356	3-hydroxy-3-methylglutaryl-Coenzyme A lyase	3	0	0	3293	0.15	0.09288	0.9123	0.0737492	0.0248516	0.682719	0.752546	0.11274	0.291822	0.999548	0.143581	0.176933	1	0.193101	0.0612329	0.332815
665	Plod1	18822	procollagen-lysine, 2-oxoglutarate 5-dioxygenase 1	3	0	0	4724	-0.09	0.1917	1.026	0.0145449	0.0249354	0.255195	0.752818	0.170293	0.29215	0.999548	-0.266167	0.0127105	1	-0.168937	0.0970557	0.429373
666	Xrcc1	22594	X-ray repair complementing defective repair in Chinese hamster cells 1	3	0	0	5986	-0.05	0.2965	1.041	0.140727	0.0249232	0.941548	0.752818	-0.10259	0.292102	0.999548	0.0949026	0.238748	0.768713	-0.128424	0.115762	0.470894
667	Cntnap4	170571	contactin associated protein-like 4	3	0	0	2670	0.22	0.05942	0.8122	0.000346221	0.0250198	0.0155737	0.753789	0.120802	0.292479	0.999548	0.189904	0.0396471	1	0.340134	0.000326644	0.00911536
668	Orai2	269717	ORAI calcium release-activated calcium modulator 2	3	0	0	2244	-0.26	0.04056	0.6994	0.0039755	0.0250673	0.100801	0.753789	-0.297238	0.0538824	0.999548	-0.332952	0.00448383	1	-0.137981	0.292664	0.721137
669	Trpv2	22368	transient receptor potential cation channel, subfamily V, member 2	3	0	0	3264	0.16	0.09119	0.9028	0.00561914	0.0250881	0.130966	0.753789	0.0754228	0.292745	0.999548	0.171262	0.0243904	0.305035	0.237039	0.0151934	0.146584
670	Nrxn1	18189	neurexin I	3	0	0	4271	0.09	0.1576	1.021	0.0496775	0.0251176	0.553388	0.753789	0.10741	0.085586	0.999548	0.10578	0.0729232	0.511507	0.0594025	0.292859	0.721202
671	Cacng3	54376	calcium channel, voltage-dependent, gamma subunit 3	3	0	0	5352	-0.07	0.2424	1.036	0.157998	0.025317	0.983142	0.758641	-0.256214	0.17367	0.999548	0.123412	0.188593	0.720772	-0.0898845	0.293632	0.72227
672	Nfatc3	18021	nuclear factor of activated T cells, cytoplasmic, calcineurin dependent 3	3	0	0	2122	0.33	0.03581	0.6819	0.00300013	0.0253852	0.0828315	0.75871	0.166454	0.293896	0.999548	0.219737	0.214992	1	0.592811	0.000792285	0.0178482
673	Gprc5a	232431	G protein-coupled receptor, family C, group 5, member A	3	0	0	283.6	1.17	0.0002221	0.09305	0.0102033	0.0256944	0.199088	0.75871	1.71445	0.211623	1	-1.53998	0.295084	1	3.34448	0.00367203	1
674	Fastk	66587	Fas-activated serine/threonine kinase	3	0	0	3384	-0.13	0.09831	0.944	0.0162248	0.0256035	0.276469	0.75871	-0.0934308	0.294736	0.999548	-0.10574	0.122997	0.62693	-0.179493	0.0114433	0.121375
675	Crim1	50766	cysteine rich transmembrane BMP regulator 1 (chordin like)	3	0	0	3155	0.16	0.08491	0.8756	0.0228281	0.0256872	0.345015	0.75871	0.191364	0.0100674	0.580134	0.113345	0.295057	0.813508	0.172368	0.21764	0.643719
676	Grm8	14823	glutamate receptor, metabotropic 8	3	0	0	1812	0.39	0.02503	0.6012	0.0304724	0.0256966	0.416809	0.75871	0.534673	0.0174427	0.714103	0.351253	0.295093	1	0.288928	0.183827	0.599362
677	Acvr2a	11480	activin receptor IIA	3	0	0	4191	-0.09	0.1518	1.013	0.032917	0.0254873	0.43685	0.75871	-0.0681729	0.26693	0.999548	-0.129324	0.0133482	0.219164	-0.0619504	0.294289	0.72319
678	Pls1	102502	plastin 1 (I-isoform)	3	0	0	3585	0.23	0.1108	0.9578	0.0750798	0.0255341	0.6887	0.75871	-0.306935	0.294469	1	0.49343	0.191499	1	0.492912	0.057497	0.322535
679	Rprd1b	70470	regulation of nuclear pre-mRNA domain containing 1B	3	0	0	6247	0.04	0.3195	1.063	0.131164	0.025635	0.910378	0.75871	0.136798	0.159046	0.999548	-0.121563	0.15496	0.67819	0.0963912	0.294857	0.723491
680	3110082I17Rik	73212	RIKEN cDNA 3110082I17 gene	3	0	0	5075	-0.07	0.2196	1.03	0.140124	0.0255417	0.93994	0.75871	0.138617	0.269552	0.999548	-0.213884	0.101044	1	-0.148127	0.294499	0.723491
681	Eif3j1	78655	eukaryotic translation initiation factor 3, subunit J1	3	0	0	6710	0.03	0.3609	1.081	0.189631	0.0256531	1	0.75871	0.0928746	0.163958	0.999548	-0.0855275	0.263569	0.785628	0.0935371	0.294926	0.723491
682	Tmbim1	69660	transmembrane BAX inhibitor motif containing 1	3	0	0	3352	0.25	0.09641	0.9213	8.56e-13	0.0257691	3.13e-10	0.759735	-0.210765	0.29537	0.999548	0.20033	0.208957	1	0.766952	2.24e-14	8.93e-12
683	Tbc1d19	67249	TBC1 domain family, member 19	3	0	0	6486	-0.03	0.3408	1.063	0.185394	0.0258364	1	0.760605	0.122808	0.174644	0.999548	-0.0989658	0.295627	0.813508	-0.0987681	0.2383	0.665876
684	Pmepa1	65112	prostate transmembrane protein, androgen induced 1	3	0	0	2896	0.19	0.07079	0.8354	0.0138561	0.0261162	0.247429	0.766642	0.137162	0.29669	0.999548	0.132986	0.289085	1	0.307315	0.00394851	0.0586393
685	1700019D03Rik	67080	RIKEN cDNA 1700019D03 gene	3	0	0	863.5	0.77	0.004309	0.2878	0.0660075	0.0261178	0.641191	0.766642	0.4204	0.296696	1	0.988139	0.0645434	1	0.914727	0.141333	1
686	Scarf2	224024	scavenger receptor class F, member 2	3	0	0	4665	0.12	0.1871	1.041	0.0772694	0.0262173	0.697645	0.767322	-0.187815	0.176593	0.999548	0.335892	0.0643635	1	0.209717	0.297072	0.724639
687	Aldob	230163	aldolase B, fructose-bisphosphate	3	0	0	1469	-0.36	0.01541	0.5086	0.144633	0.0261978	0.952153	0.767322	-0.902726	0.296999	1	-1.33878	0.134435	1	1.17088	0.210694	1
688	Slc4a2	20535	solute carrier family 4 (anion exchanger), member 2	3	0	0	4745	-0.05	0.1933	1.025	0.00266569	0.026258	0.0762432	0.767397	-0.11825	0.297226	0.999548	-0.269511	0.0114966	1	0.247211	0.0126819	0.129256
689	Camk1	52163	calcium/calmodulin-dependent protein kinase I	3	0	0	6608	0.04	0.3517	1.078	0.0850145	0.0263424	0.735395	0.768746	-0.0695219	0.297544	0.999548	0.101975	0.0831695	0.533701	0.10087	0.156252	0.551367
690	Pla2g5	18784	phospholipase A2, group V	3	0	0	1064	-0.53	0.007159	0.4055	0.0220882	0.0265585	0.338254	0.772891	-0.680575	0.124986	1	-0.637799	0.0166052	1	-0.258661	0.298356	0.725951
691	Trpm3	226025	transient receptor potential cation channel, subfamily M, member 3	3	0	0	4167	-0.08	0.1501	1.011	0.148947	0.0265613	0.962278	0.772891	0.333609	0.161108	0.999548	-0.291621	0.182941	1	-0.270217	0.298366	0.725951
692	Nav3	260315	neuron navigator 3	3	0	0	4675	-0.12	0.1879	1.026	0.000123732	0.0266661	0.00687259	0.773702	0.202068	0.142106	0.999548	-0.0879907	0.298758	0.815036	-0.466972	2.69e-05	0.00120912
693	Veph1	72789	ventricular zone expressed PH domain-containing 1	3	0	0	1016	-0.64	0.006415	0.3957	0.0230118	0.0266467	0.346781	0.773702	-0.338892	0.298686	1	-0.575089	0.140776	1	-1.01531	0.0155373	0.148295
694	Sdc1	20969	syndecan 1	3	0	0	4093	0.16	0.1448	1.003	0.00573364	0.0267258	0.132361	0.774317	-0.290594	0.00694578	0.483917	0.207245	0.298981	1	0.578135	0.0535661	0.310788
695	Lair1	52855	leukocyte-associated Ig-like receptor 1	3	0	0	796.7	-0.49	0.003533	0.3185	0.165956	0.026769	1	0.774453	-1.42181	0.299142	1	1.90353	0.245686	1	-1.9427	0.141064	1
696	2020-03-03	320253	membrane-associated ring finger (C3HC4) 3	3	0	0	2110	-0.25	0.03536	0.6663	0.205532	0.0268208	1	0.774836	-0.302949	0.281885	0.999548	-0.207825	0.299335	1	-0.244455	0.171449	0.580061
697	Incenp	16319	inner centromere protein	3	0	0	7823	-0.02	0.4618	1.129	0.151958	0.0268684	0.970726	0.775097	0.192617	0.24454	0.999548	0.142149	0.299512	1	-0.403681	0.123757	0.48771
698	Grik1	14805	glutamate receptor, ionotropic, kainate 1	3	0	0	4712	0.11	0.1908	1.042	0.195224	0.0269696	1	0.776901	-0.188088	0.299887	0.999548	0.210292	0.267572	1	0.299972	0.166236	0.570532
699	Nup35	69482	nucleoporin 35	3	0	0	3380	0.15	0.09806	0.9235	0.043084	0.0272121	0.512901	0.782766	0.116385	0.19975	0.999548	0.0929833	0.300783	0.815036	0.248633	0.0250611	0.20324
700	Sema3b	20347	sema domain, immunoglobulin domain (Ig), short basic domain, secreted, (semaphorin) 3B	3	0	0	2070	0.31	0.03388	0.6758	0.0186934	0.0272705	0.306332	0.783325	0.212033	0.259668	0.999548	0.230338	0.300998	1	0.498187	0.00637482	0.0818861
701	Ralgds	19730	ral guanine nucleotide dissociation stimulator	3	0	0	3405	0.14	0.09958	0.9256	0.000202863	0.0273287	0.0102486	0.783879	0.216925	0.00019254	0.0575746	0.128504	0.0349709	0.36667	0.0802409	0.301213	0.728852
702	Glb1	12091	galactosidase, beta 1	3	0	0	4197	-0.12	0.1523	1.013	0.0058015	0.0274876	0.133393	0.787312	-0.157673	0.219738	0.999548	-0.297858	0.00170214	1	0.102437	0.301795	0.729433
703	Dlat	235339	dihydrolipoamide S-acetyltransferase (E2 component of pyruvate dehydrogenase complex)	3	0	0	4947	-0.06	0.2093	1.032	0.184936	0.0276191	1	0.789953	-0.0583671	0.302276	0.999548	-0.0639593	0.150975	0.670771	-0.059895	0.268561	0.695259
704	Unc5a	107448	unc-5 netrin receptor A	3	0	0	2894	-0.18	0.07069	0.8381	9.29e-06	0.027736	0.00074252	0.790884	-0.131458	0.138998	0.999548	-0.0714828	0.302701	0.815036	-0.329642	1.42e-06	0.000108295
705	B4galnt1	14421	beta-1,4-N-acetyl-galactosaminyl transferase 1	3	0	0	4202	0.1	0.1526	1.014	0.00499954	0.0277164	0.119884	0.790884	0.0485606	0.30263	0.999548	0.157105	0.00123439	0.0412257	0.0948885	0.251206	0.677219
706	Ankrd46	68839	ankyrin repeat domain 46	3	0	0	5179	-0.06	0.228	1.032	0.0496595	0.0277696	0.553388	0.790884	-0.0446814	0.302824	0.999548	-0.0350381	0.256351	0.784526	-0.0913637	0.0235335	0.196461
707	Cldnd1	224250	claudin domain containing 1	3	0	0	5034	0.07	0.2163	1.046	0.0903569	0.0279174	0.753843	0.793842	0.0599867	0.30336	0.999548	0.0611866	0.149074	0.668389	0.077974	0.0932812	0.421729
708	Dmrtb1	56296	DMRT-like family B with proline-rich C-terminal, 1	3	0	0	5928	-0.03	0.2915	1.042	0.246358	0.0279525	1	0.793842	0.405806	0.211626	1	0.332236	0.303487	1	-0.838014	0.301469	1
709	Ptbp1	19205	polypyrimidine tract binding protein 1	3	0	0	4500	0.09	0.1745	1.036	0.239107	0.0280054	1	0.794225	0.0742656	0.303679	0.999548	0.0737026	0.258979	0.785056	0.111183	0.234484	0.661721
710	Shd	20420	src homology 2 domain-containing transforming protein D	3	0	0	2257	0.28	0.04109	0.7032	0.0213121	0.0281425	0.33014	0.796065	0.333742	0.0334603	0.900598	0.15897	0.304173	1	0.334391	0.0580627	0.324021
711	B2m	12010	beta-2 microglobulin	3	0	0	5894	-0.05	0.2885	1.042	0.204203	0.0281495	1	0.796065	-0.139161	0.15508	0.999548	-0.0532023	0.303524	0.815036	0.0546321	0.304198	0.732423
712	Lnx2	140887	ligand of numb-protein X 2	3	0	0	8593	0	0.5309	1.093	0.0451529	0.0282477	0.527037	0.7966	-0.149174	0.304552	0.999548	-0.22634	0.154078	1	0.381302	0.0341968	0.240148
713	Bckdk	12041	branched chain ketoacid dehydrogenase kinase	3	0	0	6266	0.06	0.3212	1.063	0.0484768	0.0282358	0.546983	0.7966	-0.0807509	0.304509	0.999548	0.100561	0.159632	0.682414	0.14583	0.0363653	0.248548
714	Zmynd10	114602	zinc finger, MYND domain containing 10	3	0	0	1602	0.18	0.01887	0.5308	0.0756114	0.0283252	0.6898	0.797191	-1.72438	0.121473	1	0.758374	0.30483	1	1.51638	0.0884378	1
715	Sirt1	93759	sirtuin 1	3	0	0	2704	0.2	0.06109	0.8167	0.0787306	0.0283479	0.704511	0.797191	0.19038	0.132469	0.999548	0.240371	0.0858408	1	0.163447	0.304911	0.732423
716	Psmd3	22123	proteasome (prosome, macropain) 26S subunit, non-ATPase, 3	3	0	0	5385	-0.05	0.2451	1.039	0.24068	0.028394	1	0.797371	-0.0426816	0.305076	0.999548	-0.045091	0.256478	0.784526	-0.0592882	0.238214	0.665876
717	Dact1	59036	dishevelled-binding antagonist of beta-catenin 1	3	0	0	2162	-0.31	0.03733	0.6775	3.09e-05	0.0285904	0.00205089	0.799127	-0.559314	6.11e-05	0.0270365	-0.260251	0.0124462	1	-0.118966	0.305778	0.733157
718	Rnd1	223881	Rho family GTPase 1	3	0	0	3104	-0.16	0.08207	0.8834	0.000122359	0.029071	0.00681516	0.799127	-0.0985527	0.145847	0.999548	-0.0700358	0.307482	0.818805	-0.325426	2.52e-05	0.00116127
719	Etnk2	214253	ethanolamine kinase 2	3	0	0	2241	0.29	0.04045	0.7006	0.0138291	0.028841	0.247166	0.799127	0.131722	0.306669	0.999548	0.296008	0.0505497	1	0.442876	0.0217914	0.186035
720	Epb41l2	13822	erythrocyte membrane protein band 4.1 like 2	3	0	0	5697	0.05	0.2716	1.057	0.020429	0.0287027	0.322928	0.799127	-0.182057	0.0979447	0.999548	0.188085	0.0186477	0.268211	0.136797	0.306178	0.733645
721	1700020L24Rik	66330	RIKEN cDNA 1700020L24 gene	3	0	0	874.1	-0.31	0.00444	0.3487	0.0481008	0.0286757	0.544821	0.799127	-1.76825	0.306082	1	2.25005	0.108805	1	-1.42116	0.0525179	1
722	Avpr1a	54140	arginine vasopressin receptor 1A	3	0	0	1659	0.56	0.02046	0.5449	0.0547144	0.0286432	0.58083	0.799127	-0.417828	0.305967	1	1.32071	0.0230709	1	0.779554	0.29562	1
723	G6pc3	68401	glucose 6 phosphatase, catalytic, 3	3	0	0	5534	-0.06	0.2576	1.04	0.0568549	0.0285921	0.595097	0.799127	-0.155857	0.0599832	0.999548	0.0813381	0.305785	0.81732	-0.113767	0.11995	0.479436
724	Zfp473	243963	zinc finger protein 473	3	0	0	1178	0.57	0.009153	0.3916	0.0600054	0.0288626	0.614009	0.799127	0.874338	0.306746	1	-1.05669	0.206569	1	1.90134	0.0374104	1
725	Lpxn	107321	leupaxin	3	0	0	3742	0.17	0.1209	0.9789	0.0765788	0.0290924	0.69547	0.799127	0.347294	0.175257	0.999548	0.356853	0.0618536	1	-0.190324	0.307558	0.734609
726	Dr1	13486	down-regulator of transcription 1	3	0	0	2003	0.32	0.03143	0.6603	0.0948124	0.0286679	0.769949	0.799127	0.320821	0.117491	0.999548	0.222125	0.306055	0.81732	0.406483	0.125709	0.48938
727	Nelfa	24116	negative elongation factor complex member A, Whsc2	3	0	0	5288	-0.07	0.237	1.035	0.0965105	0.0290277	0.777147	0.799127	-0.126231	0.271584	0.999548	0.0997325	0.30733	1	-0.17737	0.0555602	0.317583
728	Rin1	225870	Ras and Rab interactor 1	3	0	0	2289	0.43	0.04238	0.7107	0.175641	0.0290798	1	0.799127	1.13884	0.307513	1	0.271139	0.171545	1	-0.13407	0.214465	0.64044
729	Brpf3	268936	bromodomain and PHD finger containing, 3	3	0	0	3089	0.16	0.08123	0.8624	0.267327	0.0288161	1	0.799127	0.18309	0.306581	0.999548	0.15723	0.255268	1	0.139853	0.283079	0.710115
730	Rbm39	170791	RNA binding motif protein 39	3	0	0	3495	0.15	0.1051	0.9396	0.187217	0.0289509	1	0.799127	0.12308	0.307058	0.999548	-0.627343	0.201929	1	0.962929	0.201479	0.624873
731	Ccdc8	434130	coiled-coil domain containing 8	3	0	0	4460	-0.04	0.1715	1.022	0.183803	0.0288442	1	0.799127	0.362581	0.138168	0.999548	-0.257228	0.286485	1	-0.228805	0.30668	0.734023
732	B4galt3	57370	UDP-Gal:betaGlcNAc beta 1,4-galactosyltransferase, polypeptide 3	3	0	0	4637	0.08	0.185	1.038	0.221226	0.0290056	1	0.799127	0.0789368	0.229995	0.999548	0.0769857	0.230183	0.762849	0.0804482	0.307252	0.734517
733	Kctd2	70382	potassium channel tetramerisation domain containing 2	3	0	0	3573	0.13	0.11	0.9567	0.119006	0.0291655	0.871082	0.800041	0.0956635	0.303612	0.999548	0.193457	0.0673295	1	0.101204	0.307815	0.734812
734	mt-Co1	17708	mitochondrially encoded cytochrome c oxidase I	3	0	0	3177	0.16	0.08615	0.8793	0.0579779	0.029343	0.603227	0.800963	0.117585	0.308438	0.999548	0.147018	0.0634595	0.479454	0.214683	0.115481	0.470443
735	Kank2	235041	KN motif and ankyrin repeat domains 2	3	0	0	4327	-0.06	0.1617	1.019	0.0713636	0.0292558	0.668331	0.800963	-0.233617	0.308132	0.999548	-0.214233	0.244541	1	0.260023	0.0400633	0.261572
736	Hps4	192232	HPS4, biogenesis of lysosomal organelles complex 3 subunit 2	3	0	0	2956	0.18	0.07396	0.8459	0.0752901	0.0293789	0.689183	0.800963	0.123814	0.308564	0.999548	0.241261	0.0623253	1	0.167682	0.169261	0.576245
737	Npepps	19155	aminopeptidase puromycin sensitive	3	0	0	7056	-0.03	0.3922	1.104	0.115464	0.029327	0.85444	0.800963	0.0504239	0.308382	0.999548	-0.0542991	0.268218	0.793468	-0.0863448	0.0727684	0.368922
738	Ythdc1	231386	YTH domain containing 1	3	0	0	5920	0.05	0.2908	1.058	0.215067	0.0293983	1	0.800963	0.110731	0.308632	0.999548	-0.126128	0.250811	1	0.168806	0.200854	0.623894
739	Ssc5d	269855	scavenger receptor cysteine rich family, 5 domains	3	0	0	3743	0.12	0.121	0.9783	0.00295332	0.0296313	0.0819068	0.802396	-0.553537	0.309445	1	0.345088	0.245818	1	0.580101	0.000645585	0.01528
740	Ube2g2	22213	ubiquitin-conjugating enzyme E2G 2	3	0	0	6171	0.07	0.3128	1.061	0.00908251	0.0296232	0.18244	0.802396	-0.0803787	0.259569	0.999548	0.0725196	0.309417	0.819359	0.211422	0.00246442	0.0418229
741	Trappc8	75964	trafficking protein particle complex 8	3	0	0	6634	0.02	0.3541	1.077	0.0265557	0.0296805	0.381124	0.802396	0.0819254	0.309616	0.999548	-0.153349	0.0338987	0.362493	0.133275	0.075142	0.375833
742	Rpl36	54217	ribosomal protein L36	3	0	0	69.89	2.2	3.31e-06	0.03322	0.0661612	0.0295772	0.642038	0.802396	1.78413	0.309257	1	3.281	0.035143	1	1.5488	0.249838	1
743	Itpa	16434	inosine triphosphatase (nucleoside triphosphate pyrophosphatase)	3	0	0	3906	-0.1	0.1319	0.9996	0.091457	0.0296903	0.757383	0.802396	-0.0741324	0.222375	0.999548	-0.126376	0.0623348	0.474292	-0.0954666	0.30965	0.736716
744	Gcsh	68133	glycine cleavage system protein H (aminomethyl carrier)	3	0	0	4049	-0.09	0.1418	1.002	0.131809	0.029588	0.912003	0.802396	-0.0659723	0.309294	0.999548	-0.101217	0.131532	0.640677	-0.113728	0.179937	0.593548
745	Slc35d3	76157	solute carrier family 35, member D3	3	0	0	3783	0.15	0.1236	0.9804	0.149723	0.0297972	0.963794	0.804205	0.38739	0.122023	0.999548	0.317925	0.234292	1	-0.249804	0.310022	0.737188
746	Alkal2	100294583	ALK and LTK ligand 2	3	33.3333	0	545.5	1.02	0.001342	0.1955	2.12e-09	0.0298967	3.8e-07	0.805417	0.463187	0.310366	1	0.803607	0.111981	1	1.79273	1.69e-10	3.72e-08
747	2310022A10Rik	66367	RIKEN cDNA 2310022A10 gene	3	0	0	6116	0	0.3079	1.047	0.0394788	0.0299222	0.485802	0.805417	-0.116537	0.106035	0.999548	-0.0788282	0.310455	0.819612	0.19458	0.0406447	0.263468
748	Rangap1	19387	RAN GTPase activating protein 1	3	0	0	3524	-0.12	0.1069	0.9671	6.14e-07	0.030207	6.75e-05	0.810912	-0.0498174	0.311436	0.999548	-0.123301	0.00150742	0.0486849	-0.199785	6.11e-06	0.00035826
749	Mat2a	232087	methionine adenosyltransferase II, alpha	3	0	0	3005	-0.16	0.07658	0.8593	7.2e-05	0.0302034	0.00427112	0.810912	-0.119331	0.0180064	0.714103	-0.270518	0.000109158	0.00682583	-0.0971786	0.311424	0.738735
750	Mxd4	17122	Max dimerization protein 4	3	0	0	7043	0.01	0.3911	1.101	0.106022	0.0302564	0.817412	0.811153	0.08253	0.233246	0.999548	0.0594397	0.311606	0.819883	-0.126407	0.0731075	0.370234
751	Ap5z1	231855	adaptor-related protein complex 5, zeta 1 subunit	3	0	0	4643	0.1	0.1854	1.039	0.0643568	0.0303543	0.635617	0.811809	0.233512	0.311942	0.999548	-0.203463	0.158635	1	0.267754	0.0527958	0.308825
752	Prr15	78004	proline rich 15	3	0	0	1520	0.5	0.01668	0.4992	0.0929336	0.0303821	0.762334	0.811809	0.538294	0.12691	1	0.379566	0.312037	1	0.568333	0.11091	0.46009
753	Zc3h7a	106205	zinc finger CCCH type containing 7 A	3	0	0	5572	0.06	0.2609	1.06	0.116548	0.030402	0.85966	0.811809	0.125755	0.312105	0.999548	-0.138998	0.265591	1	0.20632	0.073615	0.3713
754	Acly	104112	ATP citrate lyase	3	0	0	3654	-0.12	0.1152	0.984	0.000856964	0.0304905	0.0323283	0.813093	-0.0644867	0.312407	0.999548	-0.0725689	0.0240999	0.303339	-0.228027	0.00146791	0.0279602
755	Plekhd1	217682	pleckstrin homology domain containing, family D (with coiled-coil domains) member 1	3	0	33.3333	792.2	-0.75	0.003483	0.3169	8.69e-09	0.0305365	1.42e-06	0.813234	-0.872301	0.00394395	0.387406	-0.263674	0.312564	1	-1.12195	2.19e-08	3.06e-06
756	Tmem150a	232086	transmembrane protein 150A	3	0	0	3228	0.15	0.08912	0.8937	0.216608	0.0305767	1	0.813234	0.165986	0.187171	0.999548	0.144677	0.268692	1	0.141715	0.312702	0.74053
757	Enpp6	320981	ectonucleotide pyrophosphatase/phosphodiesterase 6	3	0	0	2095	0.3	0.03478	0.6796	0.0586345	0.0307376	0.607088	0.814284	-1.0183	0.0244823	1	0.285223	0.299363	1	1.63306	0.313249	1
758	Nrn1	68404	neuritin 1	3	0	0	5742	-0.04	0.2754	1.042	0.0753382	0.0307063	0.689183	0.814284	-0.115718	0.313143	0.999548	0.12831	0.166903	1	-0.14685	0.0623375	0.335471
759	Ttc22	230576	tetratricopeptide repeat domain 22	3	0	0	3591	-0.05	0.1111	0.98	0.17024	0.0307	1	0.814284	0.687143	0.112945	1	-0.348333	0.304858	1	-0.478838	0.313121	1
760	Ap2a2	11772	adaptor-related protein complex 2, alpha 2 subunit	3	0	0	3508	-0.13	0.1059	0.9663	1.16e-09	0.0309504	2.22e-07	0.815777	-0.0366472	0.31397	0.999548	-0.132001	2.23e-05	0.0017714	-0.218116	4.37e-07	3.91e-05
761	Rsad2	58185	radical S-adenosyl methionine domain containing 2	3	0	0	2211	-0.06	0.03926	0.6895	0.1081	0.0309968	0.826301	0.815777	1.18183	0.157881	1	-0.639565	0.314127	1	-0.708312	0.11021	0.458975
762	Itpr2	16439	inositol 1,4,5-triphosphate receptor 2	3	0	0	2858	0.26	0.0688	0.8334	0.118893	0.0309575	0.870886	0.815777	0.639885	0.160803	1	-0.407134	0.313995	1	0.5439	0.124448	0.488272
763	Kcnj9	16524	potassium inwardly-rectifying channel, subfamily J, member 9	3	0	0	2400	0.24	0.04708	0.7466	0.194696	0.0309929	1	0.815777	0.241431	0.314114	0.999548	0.269478	0.173988	1	0.204691	0.243036	0.672056
764	Pcyt1a	13026	phosphate cytidylyltransferase 1, choline, alpha isoform	3	0	0	6645	0.04	0.355	1.077	0.217852	0.0308625	1	0.815777	0.0980095	0.193699	0.999548	-0.0606446	0.313673	0.821337	0.0822674	0.26121	0.687223
765	C2cd3	277939	C2 calcium-dependent domain containing 3	3	0	0	5174	0	0.2277	1.033	0.0222874	0.0310583	0.340268	0.816326	0.360169	0.0450513	0.956359	-0.115193	0.314335	1	-0.255761	0.0442425	0.278142
766	Pomp	66537	proteasome maturation protein	3	0	0	5834	0.05	0.2833	1.056	0.157763	0.0313141	0.982845	0.821022	0.193001	0.315195	0.999548	0.0558006	0.204238	0.734811	-0.0865961	0.149058	0.537109
767	Epb41l4a	13824	erythrocyte membrane protein band 4.1 like 4a	3	0	0	4825	-0.04	0.1996	1.028	0.204633	0.0313186	1	0.821022	-0.185133	0.253875	0.999548	-0.153896	0.315211	1	0.221376	0.179527	0.593055
768	Kcnk2	16526	potassium channel, subfamily K, member 2	3	0	0	2775	0.2	0.0646	0.8211	0.0682929	0.0314304	0.654451	0.822878	0.12172	0.315585	0.999548	0.176952	0.273907	1	0.309564	0.0328354	0.23406
769	Myc	17869	myelocytomatosis oncogene	3	0	0	3115	0.19	0.08266	0.8711	0.0102659	0.0315162	0.199629	0.823601	0.0868863	0.315872	0.999548	0.128866	0.0900683	0.550334	0.347303	0.00812264	0.0958592
770	Fbxo34	78938	F-box protein 34	3	0	0	4227	0.09	0.1544	1.016	0.22358	0.0315399	1	0.823601	0.116446	0.262994	0.999548	0.0933664	0.199112	0.730413	0.0708742	0.315951	0.743952
771	Tmem270	76629	transmembrane protein 270	3	0	0	1264	0.54	0.01082	0.425	0.00357452	0.0316482	0.0938289	0.823849	0.452365	0.200691	1	0.355635	0.316312	1	0.824587	0.000977355	0.0209958
772	Nectin3	58998	nectin cell adhesion molecule 3	3	0	0	2993	0.19	0.07595	0.8517	0.0207219	0.0316287	0.325452	0.823849	0.146668	0.200948	0.999548	0.102872	0.316248	1	0.313894	0.00896454	0.102483
773	Tmsb15b1	666244	thymosin beta 15b1	3	0	0	4074	0.11	0.1435	1.004	0.0500701	0.0316723	0.554689	0.823849	0.0650009	0.316393	0.999548	0.0905038	0.0609091	0.471565	0.174929	0.0958729	0.426506
774	Alb	11657	albumin	3	0	0	924.8	-0.27	0.005098	0.3674	0.00176689	0.0317416	0.0559479	0.824585	1.44679	0.316623	1	1.72134	0.116948	1	-3.98902	0.00071062	1
775	Mt3	17751	metallothionein 3	3	0	0	2958	-0.16	0.07405	0.8469	2.38e-08	0.0318623	3.59e-06	0.826651	-0.088693	0.317024	0.999548	-0.135141	0.000135519	0.00805117	-0.254527	1.88e-06	0.000134204
776	Robo2	268902	roundabout guidance receptor 2	3	0	0	5493	0.05	0.2542	1.056	0.0506565	0.0320174	0.558646	0.827064	0.10606	0.317538	0.999548	0.161612	0.0234833	0.298658	-0.107408	0.251752	0.678111
777	Egr1	13653	early growth response 1	3	0	0	4650	-0.1	0.186	1.026	0.0671601	0.0320427	0.648913	0.827064	-0.13103	0.317621	0.999548	0.116631	0.180433	0.706244	-0.287458	0.0483816	0.294311
778	Mtrr	210009	5-methyltetrahydrofolate-homocysteine methyltransferase reductase	3	0	0	2570	-0.19	0.05468	0.7775	0.104373	0.0320047	0.81028	0.827064	-0.187076	0.180397	0.999548	-0.135978	0.317496	1	-0.23307	0.0906816	0.416308
779	Cdkn1c	12577	cyclin-dependent kinase inhibitor 1C (P57)	3	0	0	3339	0.36	0.09561	0.9189	0.11291	0.0319981	0.844602	0.827064	-0.119507	0.317474	0.999548	0.109636	0.154576	0.677636	1.07753	0.118695	0.477781
780	mt-Nd5	17721	mitochondrially encoded NADH dehydrogenase 5	3	0	0	3669	0.13	0.1162	0.971	0.171577	0.0321762	1	0.829444	0.100911	0.318062	0.999548	0.10217	0.230815	0.762849	0.178451	0.148639	0.536049
781	Ksr1	16706	kinase suppressor of ras 1	3	0	0	4030	-0.13	0.1404	1.001	0.00644029	0.0324097	0.143323	0.832051	0.176848	0.318829	0.999548	-0.2482	0.0467998	1	-0.330167	0.00861673	0.0999369
782	Amph	218038	amphiphysin	3	0	0	2748	-0.19	0.06326	0.8123	0.00976948	0.0324657	0.193151	0.832051	-0.154897	0.319013	0.999548	-0.307443	0.0089257	1	-0.100459	0.0762208	0.379057
783	Rassf2	215653	Ras association (RalGDS/AF-6) domain family member 2	3	0	0	3202	-0.13	0.08761	0.9071	0.0878287	0.0324617	0.743638	0.832051	-0.131353	0.146913	0.999548	-0.156729	0.0864311	0.54202	-0.112893	0.319	0.746182
784	Pctp	18559	phosphatidylcholine transfer protein	3	0	0	488.7	-0.96	0.001001	0.2119	0.29847	0.0323622	1	0.832051	-2.89401	0.278303	1	1.23198	0.300697	1	-1.22549	0.318674	1
785	Ppp4r3b	104570	protein phosphatase 4 regulatory subunit 3B	3	0	0	4926	-0.06	0.2076	1.032	0.280194	0.0324842	1	0.832051	-0.066093	0.244745	0.999548	-0.0578424	0.319074	0.822961	-0.0593782	0.306877	0.734355
786	Atxn1l	52335	ataxin 1-like	3	0	0	5001	0.07	0.2136	1.046	0.263001	0.0325791	1	0.833419	0.200834	0.319384	0.999548	-0.204618	0.279216	1	0.224051	0.241788	0.670191
787	Kat2b	18519	K(lysine) acetyltransferase 2B	3	0	0	1966	0.35	0.03016	0.6499	0.119513	0.0327549	0.872299	0.835791	0.285151	0.319957	1	0.525372	0.068805	1	0.233575	0.287618	0.714902
788	Eln	13717	elastin	3	0	0	2762	0.2	0.06396	0.8202	0.159743	0.0327365	0.98708	0.835791	0.158508	0.318481	0.999548	0.146906	0.319897	1	0.298952	0.095992	0.426625
789	Coq2	71883	coenzyme Q2 4-hydroxybenzoate polyprenyltransferase	3	0	0	6283	-0.04	0.3227	1.053	0.157725	0.0328067	0.982845	0.836051	0.102897	0.216506	0.999548	-0.125358	0.138396	0.652087	-0.0832048	0.320126	0.746902
790	Chpf	74241	chondroitin polymerizing factor	3	0	0	3655	-0.12	0.1153	0.9825	2.39e-06	0.0330031	0.000228089	0.836405	-0.0494615	0.320763	0.999548	-0.124243	0.000753186	0.0293324	-0.174208	5.38e-05	0.00212389
791	Myo1b	17912	myosin IB	3	0	0	2494	0.26	0.05121	0.7684	0.0052884	0.0328991	0.125394	0.836405	0.104022	0.320426	0.999548	0.223977	0.0996356	1	0.441616	0.00315136	0.049664
792	Abcc8	20927	ATP-binding cassette, sub-family C (CFTR/MRP), member 8	3	0	0	4779	-0.08	0.196	1.026	0.0687089	0.0330495	0.654892	0.836405	0.154709	0.320914	0.999548	-0.219306	0.0648954	1	-0.184049	0.137452	0.51292
793	Lcn2	16819	lipocalin 2	3	0	0	197.5	1.64	7.81e-05	0.07473	0.0861637	0.0331118	0.736469	0.836405	2.11651	0.117965	1	1.40687	0.321115	1	1.39336	0.104049	1
794	Pdxk	216134	pyridoxal (pyridoxine, vitamin B6) kinase	3	0	0	1156	-0.53	0.008741	0.4225	0.102157	0.0330006	0.801747	0.836405	-0.775912	0.0632462	1	-0.398023	0.320755	1	-0.41172	0.248175	0.675165
795	Rreb1	68750	ras responsive element binding protein 1	3	0	0	1812	0.37	0.02503	0.6006	0.153878	0.0330907	0.976955	0.836405	0.399955	0.321047	1	0.409076	0.145977	1	0.31439	0.197129	0.617005
796	Rnls	67795	renalase, FAD-dependent amine oxidase	3	0	0	1706	0.42	0.02181	0.5594	0.206649	0.0330218	1	0.836405	0.35237	0.313369	1	0.523566	0.145134	1	0.3704	0.320824	0.747439
797	Slc39a5	72002	solute carrier family 39 (metal ion transporter), member 5	3	0	0	2555	0.24	0.05399	0.7821	0.0908126	0.0332274	0.753843	0.83676	-0.89053	0.176887	1	1.11986	0.0747177	1	0.506113	0.321488	1
798	Zfp317	244713	zinc finger protein 317	3	0	0	6273	-0.02	0.3218	1.053	0.158734	0.0332973	0.984391	0.83676	-0.0900795	0.321714	0.999548	0.146129	0.110574	1	-0.127329	0.272275	0.69808
799	Hes1	15205	hes family bHLH transcription factor 1	3	0	0	4979	-0.05	0.2118	1.033	0.23167	0.0333339	1	0.83676	-0.192452	0.230328	0.999548	-0.122053	0.321832	1	0.157898	0.236355	0.664068
800	A730017C20Rik	225583	RIKEN cDNA A730017C20 gene	3	0	0	5577	0.06	0.2613	1.06	0.305239	0.0332685	1	0.83676	-0.149076	0.296283	0.999548	0.147667	0.321621	1	0.197619	0.290792	0.718501
801	Fmr1	14265	fragile X mental retardation 1	3	0	0	6777	0.02	0.367	1.084	0.23179	0.0332284	1	0.83676	0.0626281	0.320848	0.999548	0.0842441	0.169995	0.693697	-0.0753436	0.321492	0.747702
802	Mpp2	50997	membrane protein, palmitoylated 2 (MAGUK p55 subfamily member 2)	3	0	0	5973	-0.05	0.2954	1.04	0.0036042	0.0334205	0.0943614	0.836843	0.123376	0.18138	0.999548	-0.0657144	0.32211	0.824116	-0.197126	0.00107278	0.0224884
803	Ints3	229543	integrator complex subunit 3	3	0	0	3838	-0.11	0.1273	0.9892	0.0121347	0.0334154	0.225427	0.836843	-0.0588367	0.322094	0.999548	-0.113281	0.0431361	0.403106	-0.143658	0.0205726	0.178991
804	Rasa3	19414	RAS p21 protein activator 3	3	0	0	3234	-0.14	0.08947	0.9136	0.000257203	0.0335735	0.0126136	0.837195	-0.0832041	0.322601	0.999548	-0.118102	0.027384	0.331882	-0.211505	0.000302784	0.00856169
805	Paqr4	76498	progestin and adipoQ receptor family member IV	3	0	0	3935	-0.1	0.1338	0.9986	0.0154785	0.0336011	0.267376	0.837195	-0.0511777	0.322689	0.999548	-0.154087	0.00716656	0.144999	-0.0970514	0.168823	0.575733
806	Efr3b	668212	EFR3 homolog B	3	0	0	2945	-0.16	0.07338	0.844	0.0195188	0.0334929	0.314748	0.837195	-0.0713418	0.322342	0.999548	-0.214346	0.0193743	0.271795	-0.20519	0.0843873	0.400652
807	Agk	69923	acylglycerol kinase	3	0	0	3382	-0.13	0.09823	0.9437	0.0527703	0.0335818	0.571766	0.837195	-0.0794363	0.322628	0.999548	-0.140595	0.0925223	0.553941	-0.160074	0.0665156	0.348416
808	Slc12a4	20498	solute carrier family 12, member 4	3	0	0	8711	0.03	0.5413	1.088	2.17e-05	0.0338703	0.00151557	0.837677	-0.128516	0.323549	0.999548	-0.0741855	0.318325	0.822961	0.297026	1.51e-06	0.000114226
809	Gipc1	67903	GIPC PDZ domain containing family, member 1	3	0	0	5667	-0.07	0.269	1.041	0.00160643	0.033818	0.0523555	0.837677	-0.0617012	0.323382	0.999548	0.0719035	0.180282	0.706244	-0.215768	0.000402367	0.0106916
810	Per1	18626	period circadian clock 1	3	0	0	2281	0.26	0.04205	0.7099	0.00315184	0.0337882	0.0856407	0.837677	0.228832	0.103849	0.999548	0.178418	0.323287	1	0.386405	0.00158383	0.0298569
811	Igf2bp2	319765	insulin-like growth factor 2 mRNA binding protein 2	3	0	0	1618	0.4	0.0193	0.5322	0.0061263	0.0337361	0.138406	0.837677	0.183752	0.323121	0.999548	0.404533	0.0210197	1	0.603192	0.0177861	0.162103
812	Lhb	16866	luteinizing hormone beta	3	0	0	2468	-0.12	0.05005	0.7532	0.109963	0.0338657	0.832462	0.837677	-0.874682	0.11891	1	-0.505908	0.323534	1	1.00924	0.145661	1
813	Usp42	76800	ubiquitin specific peptidase 42	3	0	0	3864	0.11	0.129	0.9894	0.124081	0.0337705	0.885313	0.837677	0.166318	0.074982	0.999548	0.0919777	0.276127	0.800333	0.0805837	0.323231	0.747947
814	Adnp	11538	activity-dependent neuroprotective protein	3	0	0	6982	0.01	0.3854	1.099	0.0709187	0.0339627	0.665958	0.838928	0.095942	0.201751	0.999548	0.0480645	0.323843	0.826606	-0.108035	0.0458007	0.284717
815	Kit	16590	KIT proto-oncogene receptor tyrosine kinase	3	0	0	3703	-0.11	0.1184	0.9832	0.0092633	0.0340948	0.185297	0.840535	-0.0676615	0.324262	0.999548	-0.0830327	0.174336	0.697109	-0.191617	0.00358949	0.0544861
816	Exoc2	66482	exocyst complex component 2	3	0	0	4478	-0.07	0.1729	1.023	0.11086	0.0341113	0.836245	0.840535	-0.0746704	0.230244	0.999548	-0.0996733	0.0759431	0.517814	-0.0480018	0.324314	0.748529
817	Pygm	19309	muscle glycogen phosphorylase	3	0	0	3966	0.09	0.136	0.9992	0.0168666	0.0342478	0.285228	0.842865	0.436731	0.300532	1	0.232108	0.324746	1	-0.394957	0.00446881	0.0636743
818	Aplp1	11803	amyloid beta (A4) precursor-like protein 1	3	0	0	9150	-0.02	0.5797	1.053	0.0578507	0.034353	0.602697	0.844128	0.0404245	0.130757	0.999548	0.0283056	0.325078	0.826606	-0.127182	0.0530157	0.309524
819	Bmp6	12161	bone morphogenetic protein 6	3	0	0	837.9	0.66	0.004001	0.2793	0.119576	0.0343831	0.872392	0.844128	0.754115	0.231982	1	0.615304	0.325173	1	0.613941	0.0840036	0.400018
820	Crtc3	70461	CREB regulated transcription coactivator 3	3	0	0	4760	0.06	0.1945	1.042	0.196981	0.0344383	1	0.844451	0.260971	0.325347	0.999548	-0.296678	0.202802	1	0.225504	0.205031	0.629124
821	D2hgdh	98314	D-2-hydroxyglutarate dehydrogenase	3	0	0	5504	0.04	0.2551	1.055	0.150512	0.0345561	0.965647	0.84631	0.11674	0.325718	0.999548	0.162853	0.199138	1	-0.171774	0.137736	0.513197
822	Wls	68151	wntless WNT ligand secretion mediator	3	0	0	5300	0.15	0.2381	1.055	0	0.0347876	0	0.846508	-0.0993723	0.201685	0.999548	0.0576761	0.326444	0.826606	0.49138	2.58e-21	3.29e-18
823	Tbc1d17	233204	TBC1 domain family, member 17	3	0	0	3121	0.19	0.08302	0.8708	1.28e-05	0.0351957	0.000957971	0.846508	0.0842427	0.327715	0.999548	0.116166	0.100687	0.573156	0.380947	2.59e-06	0.000171838
824	Trappc9	76510	trafficking protein particle complex 9	3	0	0	3312	-0.14	0.09403	0.9309	3.79e-05	0.0348277	0.00244533	0.846508	-0.0522678	0.326569	0.999548	-0.175376	0.00073748	0.0292899	-0.182277	0.00121994	0.0243626
825	Ptcd1	71799	pentatricopeptide repeat domain 1	3	0	0	4449	-0.12	0.1707	1.022	0.00454156	0.0349902	0.111194	0.846508	0.094605	0.327076	0.999548	-0.241784	0.00840419	1	-0.207717	0.0303127	0.223817
826	Letm1	56384	leucine zipper-EF-hand containing transmembrane protein 1	3	0	0	4199	-0.09	0.1524	1.012	0.00686563	0.0348555	0.149079	0.846508	-0.0694932	0.242728	0.999548	-0.0441392	0.326656	0.826606	-0.166889	0.00175645	0.032301
827	Cct7	12468	chaperonin containing Tcp1, subunit 7 (eta)	3	0	0	5543	-0.05	0.2584	1.039	0.0186365	0.0350221	0.305869	0.846508	-0.0339221	0.327175	0.999548	-0.0579578	0.0503186	0.439578	-0.0668904	0.0301456	0.223228
828	Timp3	21859	tissue inhibitor of metalloproteinase 3	3	0	0	6080	-0.01	0.3048	1.046	0.032374	0.0351478	0.433385	0.846508	-0.138643	0.0837413	0.999548	-0.0635996	0.327567	0.826606	0.18617	0.0373873	0.252029
829	Sesn1	140742	sestrin 1	3	0	0	8399	-0.02	0.5137	1.096	0.0353581	0.0346086	0.455372	0.846508	0.116786	0.240865	0.999548	0.0796209	0.325883	0.826606	-0.252379	0.0146991	0.143521
830	Eef1akmt2	72096	EEF1A lysine methyltransferase 2	3	0	0	2685	0.21	0.06017	0.8141	0.0481768	0.0348641	0.544821	0.846508	0.127897	0.326683	0.999548	0.231734	0.0913862	1	0.262997	0.0587112	0.325993
831	Dbil5	13168	diazepam binding inhibitor-like 5	3	0	0	800	0.86	0.003569	0.276	0.0808664	0.0350143	0.714271	0.846508	1.01522	0.327151	1	2.41432	0.034947	1	-0.841541	0.314989	1
832	Prepl	213760	prolyl endopeptidase-like	3	0	0	6987	-0.02	0.3859	1.1	0.090811	0.0351903	0.753843	0.846508	0.0761697	0.111372	0.999548	-0.0883709	0.116419	0.61593	-0.0586524	0.327698	0.749715
833	Natd1	24083	N-acetyltransferase domain containing 1	3	0	0	710.1	0.91	0.002651	0.2422	0.175159	0.0351847	1	0.846508	0.780097	0.297575	1	0.132064	0.327681	1	1.82531	0.115533	1
834	C1qtnf2	69183	C1q and tumor necrosis factor related protein 2	3	0	0	967	-0.57	0.005683	0.3771	0.166066	0.035085	1	0.846508	-0.552134	0.197938	1	-0.582837	0.160157	1	-0.583895	0.327371	1
835	Slc35e2	320541	solute carrier family 35, member E2	3	0	0	2546	-0.19	0.05357	0.7755	0.249149	0.0347883	1	0.846508	-0.15203	0.326446	0.999548	-0.190288	0.248182	1	-0.214623	0.243435	0.672573
836	Ubn2	320538	ubinuclein 2	3	0	0	6001	0.05	0.2979	1.06	0.261888	0.0350975	1	0.846508	-0.147702	0.244233	0.999548	0.141251	0.267756	1	0.145282	0.32741	0.749715
837	Thap3	69876	THAP domain containing, apoptosis associated protein 3	3	0	0	3183	0.17	0.0865	0.8802	0.0684401	0.0353081	0.654451	0.847183	0.104413	0.328063	0.999548	0.132165	0.249772	1	0.262776	0.0347432	0.242076
838	Dennd4c	329877	DENN/MADD domain containing 4C	3	0	0	4379	-0.08	0.1655	1.02	0.31111	0.0352766	1	0.847183	-0.226945	0.274778	0.999548	-0.19369	0.327966	1	0.174957	0.31771	0.744782
839	Ccdc188	102638083	coiled-coil domain containing 188	3	0	0	277.2	-1.37	0.000208	0.1493	0.156822	0.035448	0.981392	0.849527	-2.17967	0.131977	1	-1.11443	0.219324	1	-0.813191	0.328496	1
840	Cnksr2	245684	connector enhancer of kinase suppressor of Ras 2	3	0	0	5873	0.05	0.2867	1.057	0.0654093	0.0355029	0.63906	0.84983	0.123475	0.0737457	0.999548	0.0905597	0.110255	0.603503	-0.0627759	0.328666	0.750413
841	Ccna1	12427	cyclin A1	3	0	0	2771	-0.19	0.06437	0.8135	0.0866188	0.035778	0.739552	0.855396	-0.390822	0.329513	1	0.524275	0.147455	1	-0.696727	0.0817307	0.393743
842	Cdh7	241201	cadherin 7, type 2	3	0	0	2422	0.28	0.04802	0.7513	0.00095828	0.0359553	0.0353544	0.858128	0.084434	0.330056	0.999548	0.3521	0.00409675	1	0.41345	0.00933785	0.105337
843	Hivep3	16656	human immunodeficiency virus type I enhancer binding protein 3	3	0	0	2292	-0.22	0.04251	0.7093	0.111144	0.0360203	0.837619	0.858128	-0.287086	0.330255	0.999548	-0.169896	0.244647	1	-0.216511	0.0704487	0.361318
844	Abca8b	27404	ATP-binding cassette, sub-family A (ABC1), member 8b	3	0	0	2024	0.33	0.03219	0.67	0.126878	0.0359807	0.894193	0.858128	0.433777	0.180497	1	0.370305	0.11608	1	0.195609	0.330134	0.751458
845	Wdr48	67561	WD repeat domain 48	3	0	0	5835	-0.06	0.2835	1.044	0.0359076	0.0361449	0.460455	0.860078	0.0590726	0.330635	0.999548	-0.0797468	0.146527	0.665085	-0.166798	0.0243126	0.200219
846	G0s2	14373	G0/G1 switch gene 2	3	0	0	1206	-0.5	0.009666	0.4367	0.0110042	0.036189	0.209726	0.860109	-0.341077	0.33077	1	-0.362671	0.183427	1	-0.798362	0.00415975	0.0606915
847	Arhgef26	622434	Rho guanine nucleotide exchange factor (GEF) 26	3	0	0	3169	0.17	0.08571	0.8797	0.00350526	0.0363283	0.0922516	0.861383	0.177104	0.096624	0.999548	0.0824904	0.331193	0.827528	0.241803	0.00189277	0.0343047
848	Spag6l	50525	sperm associated antigen 6-like	3	0	0	1962	-0.18	0.03002	0.636	0.272164	0.0363062	1	0.861383	1.16153	0.331126	1	-0.784076	0.305851	1	-0.905013	0.225382	1
849	Trim12a	76681	tripartite motif-containing 12A	3	0	0	3482	-0.17	0.1043	0.9613	0.0602715	0.0366087	0.614772	0.861933	0.354874	0.332043	1	-0.44862	0.127749	1	-0.406002	0.0562274	0.318674
850	Gskip	66787	GSK3B interacting protein	3	0	0	4427	-0.09	0.1691	1.021	0.07757	0.0366047	0.699252	0.861933	-0.15779	0.167517	0.999548	-0.227098	0.0610409	1	0.103378	0.332031	0.753031
851	Clk4	12750	CDC like kinase 4	3	0	0	4742	0.03	0.1931	1.044	0.103956	0.0365764	0.808604	0.861933	0.172564	0.291499	0.999548	0.24089	0.331946	1	-0.308835	0.0533653	0.310357
852	Pck2	74551	phosphoenolpyruvate carboxykinase 2 (mitochondrial)	3	0	0	4597	-0.05	0.1819	1.022	0.222769	0.0364014	1	0.861933	0.307111	0.257452	1	-0.274429	0.192779	1	-0.193656	0.331415	0.752633
853	Faf1	14084	Fas-associated factor 1	3	0	0	4513	-0.08	0.1755	1.022	0.212402	0.0365595	1	0.861933	-0.0681816	0.283882	0.999548	-0.0522458	0.331895	0.827528	-0.112702	0.161771	0.561083
854	Zfp248	72720	zinc finger protein 248	3	0	0	5090	0.02	0.2208	1.042	0.200231	0.0365835	1	0.861933	0.172726	0.245377	0.999548	0.172011	0.331967	1	-0.272044	0.170413	0.57896
855	Hspb1	15507	heat shock protein 1	3	33.3333	0	256.9	1.48	0.0001674	0.08413	1.04e-06	0.0367561	0.000105519	0.862089	0.938034	0.332488	1	1.60909	0.0440809	1	1.89321	3.51e-07	3.29e-05
856	Car2	12349	carbonic anhydrase 2	3	0	0	4298	-0.11	0.1596	1.018	0.000683191	0.0367866	0.0267255	0.862089	0.162814	0.33258	0.999548	-0.226158	0.0294846	0.339159	-0.270881	0.000860996	0.0190059
857	Fam184b	58227	family with sequence similarity 184, member B	3	0	0	2337	-0.23	0.0444	0.7188	0.0253868	0.0367978	0.368689	0.862089	-0.243572	0.166678	0.999548	-0.104172	0.332614	1	-0.354355	0.0134064	0.134495
858	Nptn	20320	neuroplastin	3	0	0	6575	0.03	0.3488	1.074	0.0624878	0.0369154	0.623544	0.862089	0.0881382	0.081913	0.999548	0.0662536	0.0919411	0.553941	-0.0499495	0.332968	0.753544
859	Efna4	13639	ephrin A4	3	0	0	3403	0	0.09945	0.9468	0.0770276	0.0369024	0.696718	0.862089	-0.405171	0.162501	1	-0.518249	0.332929	1	0.910079	0.062136	0.335109
860	Idh3b	170718	isocitrate dehydrogenase 3 (NAD+) beta	3	0	0	6984	-0.03	0.3857	1.1	0.0964553	0.036729	0.777098	0.862089	0.0490256	0.332407	0.999548	-0.0676801	0.132874	0.642826	-0.0743781	0.104907	0.447346
861	Spopl	76857	speckle-type POZ protein-like	3	0	0	4078	0.13	0.1438	1.004	0.27495	0.0368393	1	0.862089	0.241695	0.300879	0.999548	0.325374	0.23191	1	-0.183695	0.332739	0.753544
862	Usp5	22225	ubiquitin specific peptidase 5 (isopeptidase T)	3	0	0	3576	-0.12	0.1102	0.977	8.61e-10	0.0370539	1.7e-07	0.863317	-0.0444298	0.333384	0.999548	-0.156076	3.36e-06	0.000395584	-0.162937	1.98e-06	0.000138986
863	Hpcal4	170638	hippocalcin-like 4	3	0	0	8923	-0.01	0.56	1.064	0.201396	0.0370271	1	0.863317	0.0581446	0.333304	0.999548	0.0729479	0.192485	0.72481	-0.175402	0.218358	0.643795
864	Lcmt1	30949	leucine carboxyl methyltransferase 1	3	0	0	4370	-0.08	0.1648	1.02	0.202656	0.03722	1	0.866184	-0.0816948	0.303748	0.999548	-0.0833989	0.139501	0.652838	-0.0706606	0.333881	0.753727
865	Mybl2	17865	myeloblastosis oncogene-like 2	3	0	0	4169	0.08	0.1502	1.012	0.0379831	0.0373713	0.474451	0.868698	0.302293	0.0781041	0.999548	0.251663	0.0486421	1	-0.325386	0.334333	0.753783
866	Sox5	20678	SRY (sex determining region Y)-box 5	3	0	0	3096	0.16	0.08158	0.8643	0.00281668	0.0374678	0.0790991	0.868933	0.185971	0.0234873	0.790174	0.213169	0.00589713	0.129341	0.0878261	0.334621	0.753783
867	Atp6v1d	73834	ATPase, H+ transporting, lysosomal V1 subunit D	3	0	0	4975	-0.06	0.2115	1.033	0.102239	0.0374281	0.801764	0.868933	-0.0559456	0.186951	0.999548	-0.0407908	0.334503	0.827528	-0.0903341	0.0806016	0.391151
868	Hif1an	319594	hypoxia-inducible factor 1, alpha subunit inhibitor	3	0	0	2570	-0.21	0.05471	0.7774	0.0278119	0.0376465	0.393259	0.870067	-0.141401	0.316012	0.999548	-0.102182	0.335152	1	-0.382895	0.00791503	0.0946324
869	Traf5	22033	TNF receptor-associated factor 5	3	0	0	1707	0.49	0.02184	0.5593	0.0282371	0.0376113	0.397593	0.870067	0.5998	0.335047	1	-0.521541	0.299239	1	1.39581	0.00853079	1
870	Rgs20	58175	regulator of G-protein signaling 20	3	0	0	3759	-0.11	0.122	0.9894	0.0988649	0.0376368	0.786655	0.870067	-0.0744904	0.335123	0.999548	-0.130158	0.127446	0.635354	-0.113606	0.112421	0.463145
871	Tap1	21354	transporter 1, ATP-binding cassette, sub-family B (MDR/TAP)	3	0	0	5823	0.05	0.2824	1.055	0.304071	0.0377228	1	0.870829	0.153157	0.271035	0.999548	-0.140589	0.302847	1	0.131177	0.335378	0.754399
872	Trib3	228775	tribbles pseudokinase 3	3	0	0	1380	-0.43	0.01332	0.4835	0.00321491	0.037942	0.0866516	0.872934	-0.310781	0.336027	0.999548	-0.711857	0.000612988	1	-0.27888	0.26449	0.689919
873	Surf4	20932	surfeit gene 4	3	0	0	4753	-0.06	0.194	1.025	0.0479722	0.038031	0.54373	0.872934	-0.066162	0.101478	0.999548	-0.0848771	0.0510649	0.443057	-0.0428806	0.336289	0.754982
874	Parva	57342	parvin, alpha	3	0	0	5979	-0.01	0.2959	1.04	0.0884124	0.0378583	0.746936	0.872934	-0.129654	0.239102	0.999548	-0.0745459	0.335779	0.827925	0.168046	0.0509327	0.302496
875	Ghdc	80860	GH3 domain containing	3	0	0	2342	-0.22	0.04458	0.72	0.225667	0.0379702	1	0.872934	-0.2869	0.178758	0.999548	-0.194305	0.279514	1	-0.182254	0.336109	0.75483
876	Sppl2b	73218	signal peptide peptidase like 2B	3	0	0	6498	-0.04	0.3418	1.063	0.203891	0.0380219	1	0.872934	-0.0903368	0.204876	0.999548	0.0615786	0.336262	0.827925	-0.0821226	0.207341	0.631741
877	Cpne2	234577	copine II	3	0	0	5699	-0.03	0.2718	1.042	0.0377689	0.0383187	0.472864	0.878535	0.174765	0.0713931	0.999548	-0.158628	0.0523725	0.444221	-0.120409	0.337135	0.755743
878	Igfbp2	16008	insulin-like growth factor binding protein 2	3	0	0	2769	-0.2	0.06427	0.8133	8.41e-10	0.0386948	1.69e-07	0.881128	-0.0466188	0.338234	0.999548	-0.296721	2.73e-09	6.97e-07	-0.252935	0.00234725	0.0403229
879	Mxi1	17859	MAX interactor 1, dimerization protein	3	0	0	2822	0.22	0.06697	0.8286	2.2e-05	0.0386494	0.00153175	0.881128	0.264966	0.00610547	0.475711	0.0681994	0.338102	0.829697	0.316633	7.66e-05	0.00284501
880	Nrsn2	228777	neurensin 2	3	0	0	2713	0.21	0.06152	0.817	0.0101286	0.0384975	0.198109	0.881128	0.270876	0.0326744	0.900598	0.103938	0.337658	1	0.266539	0.0205915	0.179034
881	Ech1	51798	enoyl coenzyme A hydratase 1, peroxisomal	3	0	0	3986	0.11	0.1374	0.9979	0.0271522	0.0386793	0.386502	0.881128	0.104408	0.160115	0.999548	0.0588312	0.338189	0.829697	0.179678	0.0149979	0.145218
882	Syt10	54526	synaptotagmin X	3	0	0	1396	0.47	0.01367	0.4714	0.0427763	0.0386335	0.51075	0.881128	0.309712	0.242453	1	0.380826	0.338055	1	0.717535	0.0181932	0.163982
883	Ube2g1	67128	ubiquitin-conjugating enzyme E2G 1	3	0	0	7339	-0.01	0.4179	1.116	0.0449714	0.0385902	0.525415	0.881128	-0.0520813	0.337929	0.999548	0.103255	0.0378504	0.379667	-0.0791689	0.124771	0.488272
884	Ccdc159	67119	coiled-coil domain containing 159	3	0	0	3566	0.19	0.1096	0.9562	0.231125	0.0387495	1	0.881375	0.399027	0.294619	1	-0.39015	0.338393	1	0.561544	0.175067	0.586295
885	Vps36	70160	vacuolar protein sorting 36	3	0	0	6476	0.05	0.3399	1.071	0.241058	0.0389432	1	0.884781	-0.0745568	0.338956	0.999548	0.115203	0.186039	0.715459	0.0992298	0.296338	0.724222
886	Kcnk3	16527	potassium channel, subfamily K, member 3	3	0	0	2493	0.28	0.05119	0.7693	0.000453884	0.0390019	0.0191728	0.885114	0.134907	0.30841	0.999548	0.142233	0.339127	1	0.560212	4.98e-05	0.00198852
887	Pdcd2	18567	programmed cell death 2	3	0	0	5882	-0.05	0.2875	1.042	0.223203	0.0392554	1	0.889864	-0.108822	0.321024	0.999548	0.0820879	0.33986	1	-0.127455	0.151234	0.541131
888	Adra2c	11553	adrenergic receptor, alpha 2c	3	0	0	2660	-0.19	0.05896	0.7973	0.0199382	0.0393381	0.318932	0.890586	-0.12233	0.340098	0.999548	-0.116874	0.287587	1	-0.336569	0.00553934	0.0745245
889	Rccd1	269955	RCC1 domain containing 1	3	0	0	2725	-0.2	0.06208	0.8085	0.303258	0.0393759	1	0.890586	-0.456181	0.340207	1	0.524376	0.321715	1	-0.664788	0.250367	1
890	Hsd17b4	15488	hydroxysteroid (17-beta) dehydrogenase 4	3	0	0	6952	0.03	0.3827	1.098	0.0680562	0.0395066	0.653489	0.891879	-0.0899839	0.190553	0.999548	0.119153	0.0435226	0.404148	0.0570739	0.340583	0.757603
891	Cntln	338349	centlein, centrosomal protein	3	0	0	447.6	1.17	0.00079	0.1588	0.0987967	0.0395661	0.786648	0.891879	0.979464	0.340754	1	1.00721	0.208011	1	1.5246	0.0676734	1
892	Trim26	22670	tripartite motif-containing 26	3	0	0	5771	0.04	0.2779	1.06	0.246039	0.039553	1	0.891879	0.146617	0.340717	0.999548	-0.163421	0.213638	1	0.150882	0.265437	0.691369
893	Klc4	74764	kinesin light chain 4	3	0	0	4500	0.14	0.1745	1.036	0.00831229	0.0396439	0.173018	0.892036	0.204159	0.139048	0.999548	-0.104122	0.340977	1	0.310425	0.00373355	0.0561394
894	Jag2	16450	jagged 2	3	0	0	5547	-0.04	0.2588	1.038	0.0374912	0.0397506	0.471066	0.892036	-0.102054	0.341283	0.999548	0.189691	0.0465158	1	-0.196706	0.0786213	0.385891
895	Lrfn5	238205	leucine rich repeat and fibronectin type III domain containing 5	3	0	0	6164	-0.05	0.3122	1.048	0.10896	0.0396896	0.82969	0.892036	0.0709242	0.341108	0.999548	-0.106758	0.0625597	0.475098	-0.10433	0.259115	0.685378
896	Atmin	234776	ATM interactor	3	0	0	5731	0.04	0.2744	1.057	0.204059	0.0397241	1	0.892036	0.203911	0.165388	0.999548	0.0709968	0.341207	0.834682	-0.160275	0.253455	0.679975
897	Dnajc10	66861	DnaJ heat shock protein family (Hsp40) member C10	3	0	0	4523	-0.08	0.1762	1.022	0.0413204	0.0399169	0.499306	0.893775	-0.0769213	0.14888	0.999548	-0.0355105	0.341758	0.834682	-0.123988	0.0279653	0.215706
898	Eef1g	67160	eukaryotic translation elongation factor 1 gamma	3	0	0	5171	-0.05	0.2274	1.033	0.213759	0.0398819	1	0.893775	-0.0516267	0.341658	0.999548	-0.0550463	0.184257	0.711573	-0.0544501	0.244585	0.673455
899	Sec14l2	67815	SEC14-like lipid binding 2	3	0	0	2680	-0.18	0.0599	0.8045	0.0151997	0.0400805	0.263693	0.896439	-0.119657	0.342224	0.999548	-0.137203	0.137962	0.651356	-0.288136	0.00807795	0.0955081
900	Bcl2l13	94044	BCL2-like 13 (apoptosis facilitator)	3	0	0	5777	0.06	0.2784	1.057	0.00564321	0.0401861	0.131033	0.897489	0.0862512	0.342525	0.999548	-0.141648	0.0922107	0.553941	0.248369	0.00345299	0.0529804
901	Odc1	18263	ornithine decarboxylase, structural 1	3	0	0	7402	0.01	0.4237	1.119	0.00758671	0.0402167	0.161938	0.897489	-0.117937	0.0111632	0.602156	0.0825159	0.0412653	0.394622	0.0688227	0.342612	0.758195
902	Cpne8	66871	copine VIII	3	0	0	5917	0.04	0.2905	1.058	0.109314	0.0403511	0.830596	0.899397	-0.19744	0.147465	0.999548	0.124691	0.342993	1	0.183672	0.109839	0.458116
903	Gorab	98376	golgin, RAB6-interacting	3	0	0	5790	0.05	0.2796	1.057	0.237378	0.0403917	1	0.899397	-0.154869	0.268009	0.999548	0.202594	0.198194	1	0.109582	0.343108	0.758195
904	Ccdc122	108811	coiled-coil domain containing 122	3	0	0	1094	-0.57	0.007653	0.406	0.292412	0.0405387	1	0.900677	-0.6939	0.3024	1	-0.574595	0.343524	1	-0.437439	0.247922	0.675131
905	Tfdp1	21781	transcription factor Dp 1	3	0	0	7107	-0.01	0.3968	1.106	0.31166	0.0405378	1	0.900677	-0.0625134	0.278726	0.999548	-0.048823	0.343521	0.835769	0.082075	0.299938	0.727697
906	Atp1a2	98660	ATPase, Na+/K+ transporting, alpha 2 polypeptide	3	0	0	4251	-0.08	0.1562	1.017	0.144308	0.0407515	0.951347	0.904404	-0.0899093	0.344124	0.999548	-0.0770796	0.133467	0.643047	-0.0839695	0.182541	0.596982
907	Ncapg	54392	non-SMC condensin I complex, subunit G	3	0	0	4840	0.08	0.2008	1.045	0.260216	0.0408329	1	0.905212	0.167935	0.344353	0.999548	-0.237385	0.19153	1	0.312052	0.321215	0.747702
908	Apln	30878	apelin	3	0	0	941.7	-0.61	0.005328	0.3733	3.13e-12	0.0410003	9.82e-10	0.90614	-0.282509	0.344823	1	-0.614055	0.00126352	1	-0.928488	1.25e-11	3.27e-09
909	Stx1b	56216	syntaxin 1B	3	0	0	5353	-0.09	0.2424	1.036	0.000194588	0.04107	0.00993043	0.90614	0.0794843	0.345018	0.999548	-0.063125	0.335917	0.827925	-0.285696	1.67e-05	0.000819539
910	Mrps6	121022	mitochondrial ribosomal protein S6	3	0	0	3273	0.15	0.09174	0.9055	0.011096	0.0411001	0.21127	0.90614	0.0877986	0.345102	0.999548	0.183203	0.0277136	0.333709	0.192198	0.0266685	0.209773
911	Clcn5	12728	chloride channel, voltage-sensitive 5	3	0	0	3029	0.26	0.0779	0.8541	0.0643969	0.0410318	0.635655	0.90614	0.422118	0.0746612	0.999548	-0.266879	0.344911	1	0.611721	0.101542	0.438852
912	Lipg	16891	lipase, endothelial	3	0	0	1238	-0.48	0.01029	0.448	0.127574	0.0409545	0.896271	0.90614	-0.276385	0.226588	0.999548	-0.423529	0.344694	1	-0.749934	0.0892829	0.412488
913	Tmem267	633640	transmembrane protein 267	3	0	0	1717	-0.34	0.02213	0.5894	0.13649	0.0411784	0.928902	0.906872	-0.343705	0.171934	1	-0.268732	0.345321	1	-0.416475	0.129886	0.498814
914	Ippk	75678	inositol 1,3,4,5,6-pentakisphosphate 2-kinase	3	0	0	5091	-0.04	0.2209	1.03	0.0964415	0.0412472	0.777098	0.907393	-0.111397	0.345513	0.999548	-0.193554	0.11015	1	0.177825	0.121724	0.483904
915	Map7d3	320923	MAP7 domain containing 3	3	0	0	1445	-0.54	0.01483	0.4977	0.264573	0.0413467	1	0.908587	-0.952775	0.296528	1	-1.31985	0.212375	1	0.657453	0.345791	1
916	Slc25a32	69906	solute carrier family 25, member 32	3	0	0	3552	0.21	0.1087	0.9524	5.09e-08	0.0415028	7.01e-06	0.909103	0.157795	0.346225	0.999548	-0.257166	0.137031	1	0.717533	3.91e-09	6.49e-07
917	Ptch1	19206	patched 1	3	0	0	5789	-0.04	0.2794	1.044	0.123222	0.0414965	0.885313	0.909103	-0.138029	0.130755	0.999548	0.146844	0.146325	0.664681	-0.119637	0.346208	0.761515
918	Cdan1	68968	congenital dyserythropoietic anemia, type I (human)	3	0	0	2701	0.21	0.06091	0.8159	0.184908	0.041551	1	0.909103	0.299595	0.107785	0.999548	0.16661	0.34636	1	0.151983	0.328217	0.750167
919	Bcl2l12	75736	BCL2-like 12 (proline rich)	3	0	0	3425	-0.17	0.1008	0.9525	0.319168	0.0415182	1	0.909103	-0.45367	0.262945	1	0.379635	0.346268	1	-0.440207	0.328656	0.750413
920	Psmd12	66997	proteasome (prosome, macropain) 26S subunit, non-ATPase, 12	3	0	0	4582	-0.08	0.1808	1.023	0.124902	0.0417278	0.886482	0.91198	-0.0457809	0.34685	0.999548	-0.0711863	0.129793	0.638392	-0.109013	0.150115	0.539119
921	Nrbp1	192292	nuclear receptor binding protein 1	3	0	0	4882	-0.06	0.2041	1.031	0.21515	0.0420027	1	0.915996	-0.0703724	0.194854	0.999548	-0.0621833	0.229687	0.762849	-0.0532108	0.34761	0.761798
922	Tada1	27878	transcriptional adaptor 1	3	0	0	6693	0.04	0.3594	1.081	0.179285	0.0419697	1	0.915996	-0.0853611	0.204374	0.999548	0.0826096	0.347519	0.839035	0.123131	0.164438	0.566644
923	Fmod	14264	fibromodulin	3	0	0	2649	-0.17	0.05841	0.7935	0.0238774	0.0422016	0.354319	0.917532	-0.714885	0.348158	1	-0.441098	0.181143	1	0.645742	0.010873	0.117173
924	Zfp950	414758	zinc finger protein 950	3	0	0	3429	0.07	0.1011	0.9308	0.252786	0.04221	1	0.917532	0.467276	0.348181	1	0.502727	0.344723	1	-0.759962	0.168274	1
925	Cacna1b	12287	calcium channel, voltage-dependent, N type, alpha 1B subunit	3	0	0	6186	-0.03	0.3141	1.049	0.32155	0.0421673	1	0.917532	0.135073	0.334107	0.999548	-0.0978467	0.348064	0.839523	-0.129955	0.26066	0.686483
926	Hacl1	56794	2-hydroxyacyl-CoA lyase 1	3	0	0	2945	-0.15	0.07335	0.8452	0.123325	0.0423239	0.885313	0.919014	-0.160868	0.228314	0.999548	-0.185503	0.0833539	1	-0.115846	0.348494	0.762558
927	Slc15a2	57738	solute carrier family 15 (H+/peptide transporter), member 2	3	0	0	2731	-0.18	0.0624	0.809	0.00185158	0.0426658	0.0582626	0.925309	-0.0933222	0.34943	0.999548	-0.193198	0.0109195	0.19509	-0.244538	0.00729758	0.0892275
928	Crnkl1	66877	crooked neck pre-mRNA splicing factor 1	3	0	0	1678	-0.46	0.02099	0.5765	0.0466074	0.0427519	0.535812	0.925309	-0.325705	0.340636	1	-0.960772	0.0140662	1	-0.0859075	0.349665	0.763349
929	Olig2	50913	oligodendrocyte transcription factor 2	3	0	0	6687	0.05	0.3588	1.081	0.155858	0.0427276	0.980808	0.925309	-0.046663	0.349598	0.999548	0.097113	0.0776871	0.518326	0.0877019	0.346834	0.761515
930	Agtrap	11610	angiotensin II, type I receptor-associated protein	3	0	0	2079	-0.26	0.0342	0.6594	0.0006162	0.0428499	0.0245345	0.926224	-0.163926	0.349932	0.999548	-0.247737	0.0271061	1	-0.360129	0.000787658	0.0178178
931	Exoc3l4	74190	exocyst complex component 3-like 4	3	0	0	1736	-0.44	0.02269	0.5894	0.111715	0.0428863	0.839721	0.926224	0.704229	0.350031	1	-0.963803	0.199847	1	-1.06497	0.0819813	1
932	Allc	94041	allantoicase	3	0	0	497.8	-1.05	0.001052	0.2053	0.019417	0.0433169	0.314748	0.926917	-2.3146	0.0804212	1	0.962015	0.351198	1	-1.78822	0.0185331	1
933	Mmp17	23948	matrix metallopeptidase 17	3	0	0	5739	-0.06	0.2752	1.043	0.0202935	0.0430662	0.3218	0.926917	-0.0766022	0.350519	0.999548	0.0644445	0.226645	0.761013	-0.176563	0.00697847	0.0871865
934	Epdr1	105298	ependymin related protein 1 (zebrafish)	3	0	0	3764	-0.11	0.1224	0.9892	0.0235319	0.0429694	0.35095	0.926917	-0.0789909	0.350257	0.999548	-0.121743	0.0416528	0.395534	-0.115563	0.0461118	0.285817
935	Npr3	18162	natriuretic peptide receptor 3	3	0	0	1652	-0.39	0.02024	0.5724	0.0637624	0.0431896	0.632184	0.926917	-0.491801	0.064073	0.999548	-0.398864	0.114726	1	-0.277871	0.350854	0.764711
936	Txndc5	105245	thioredoxin domain containing 5	3	0	0	6174	-0.04	0.3131	1.048	0.0685375	0.0433533	0.654451	0.926917	-0.0919702	0.085457	0.999548	-0.0709087	0.0950197	0.560657	0.0516896	0.351297	0.765268
937	Alg11	207958	asparagine-linked glycosylation 11 (alpha-1,2-mannosyltransferase)	3	0	0	5947	0.06	0.2931	1.057	0.111506	0.0433794	0.839094	0.926917	0.0966624	0.341427	0.999548	-0.0785982	0.351367	0.842554	0.171916	0.0476729	0.291055
938	Spata25	75642	spermatogenesis associated 25	3	0	0	3569	-0.18	0.1097	0.9755	0.123573	0.043358	0.885313	0.926917	0.243239	0.351309	1	-0.352305	0.201404	1	-0.436466	0.094012	0.422917
939	Il1rl2	107527	interleukin 1 receptor-like 2	3	0	0	571.5	1	0.001516	0.2117	0.15096	0.0431491	0.966058	0.926917	2.59625	0.0757294	1	1.5464	0.350744	1	-1.14527	0.337865	1
940	Erich5	239368	glutamate rich 5	3	0	0	806.7	-0.34	0.003643	0.3241	0.309028	0.0432029	1	0.926917	2.36474	0.271243	1	-1.56693	0.297369	1	-1.80419	0.35089	1
941	Gripap1	54645	GRIP1 associated protein 1	3	0	0	6409	-0.03	0.3339	1.056	0.249525	0.043096	1	0.926917	0.101869	0.3506	0.999548	-0.077652	0.284895	0.801634	-0.128416	0.197942	0.617501
942	Epb41	269587	erythrocyte membrane protein band 4.1	3	0	0	5191	0.1	0.229	1.048	0.0370936	0.0434661	0.469215	0.926961	0.0927608	0.351601	0.999548	-0.170465	0.0638828	0.480183	0.378549	0.0547772	0.31508
943	Ubac1	98766	ubiquitin associated domain containing 1	3	0	0	6199	-0.05	0.3153	1.049	0.0639008	0.0434736	0.633245	0.926961	0.0558506	0.351621	0.999548	-0.104005	0.0514335	0.443057	-0.0979824	0.143038	0.524131
944	Zfp90	22751	zinc finger protein 90	3	0	0	2826	0.2	0.06719	0.8284	0.158191	0.0436158	0.983142	0.929008	0.133102	0.352004	0.999548	0.159781	0.29769	1	0.293896	0.0919495	0.419149
945	Cyp51	13121	cytochrome P450, family 51	3	0	0	3497	-0.16	0.1053	0.9648	1.32e-05	0.0437308	0.000979649	0.930472	-0.0610609	0.058937	0.999548	-0.040252	0.352313	0.843543	-0.386408	4.26e-06	0.000267192
946	Slc40a1	53945	solute carrier family 40 (iron-regulated transporter), member 1	3	33.3333	0	915	0.97	0.004967	0.3026	0.00160576	0.0440054	0.0523555	0.931772	2.20707	0.0495981	1	-0.41434	0.353049	1	1.13102	0.00133897	0.0261432
947	Fjx1	14221	four jointed box 1	3	0	0	4602	0.09	0.1823	1.039	0.0273102	0.0441825	0.387801	0.931772	0.0593011	0.353522	0.999548	0.053533	0.334433	0.827528	0.154031	0.00692189	0.0869044
948	Pgap3	320655	post-GPI attachment to proteins 3	3	0	0	3990	0.14	0.1376	0.9976	0.0885581	0.0442554	0.747539	0.931772	0.291385	0.106269	0.999548	0.277314	0.109042	1	-0.154251	0.353716	0.767083
949	Cpd	12874	carboxypeptidase D	3	0	0	6439	-0.04	0.3366	1.058	0.0918546	0.0440211	0.7588	0.931772	0.0903051	0.222745	0.999548	-0.0642275	0.353091	0.843701	-0.14282	0.0549157	0.315397
950	Flywch2	76917	FLYWCH family member 2	3	0	0	2313	0.25	0.04339	0.7192	0.148309	0.044036	0.960404	0.931772	0.308836	0.100355	0.999548	0.197405	0.353131	1	0.255527	0.24654	0.674876
951	Egr2	13654	early growth response 2	3	0	0	4603	0.01	0.1823	1.038	0.152336	0.0442217	0.972077	0.931772	-0.537978	0.207464	1	0.256699	0.353627	1	0.304189	0.124017	0.48771
952	Pou3f4	18994	POU domain, class 3, transcription factor 4	3	0	0	1891	0.35	0.02761	0.6272	0.155556	0.0440687	0.980799	0.931772	0.281739	0.311634	0.999548	0.256721	0.353219	1	0.51433	0.0853244	0.403601
953	Muc15	269328	mucin 15	3	0	0	751.6	-0.67	0.003055	0.2968	0.2287	0.0440631	1	0.931772	-1.2942	0.34949	1	-2.16098	0.139006	1	1.45634	0.353203	1
954	Vhl	22346	von Hippel-Lindau tumor suppressor	3	0	0	5017	-0.06	0.2149	1.03	0.317572	0.0442463	1	0.931772	-0.0561836	0.353692	0.999548	-0.0634892	0.263431	0.785628	-0.0545426	0.318388	0.745159
955	Ifitm10	320802	interferon induced transmembrane protein 10	3	0	0	4884	0.09	0.2043	1.045	0.187913	0.0441965	1	0.931772	0.329535	0.145734	0.999548	-0.220234	0.243862	1	0.15414	0.35356	0.767083
956	Scrn1	69938	secernin 1	3	0	0	3928	-0.1	0.1334	0.9979	4.12e-06	0.0446421	0.000373095	0.933021	-0.0478611	0.354744	0.999548	-0.101582	9.63e-05	0.00621841	-0.158836	0.000698995	0.0163027
957	Matn2	17181	matrilin 2	3	0	0	2174	-0.28	0.03779	0.6785	0.000873274	0.04447	0.0327592	0.933021	-0.234697	0.246843	0.999548	-0.101477	0.354287	1	-0.518112	0.000129244	0.00425739
958	Nceh1	320024	neutral cholesterol ester hydrolase 1	3	0	0	4315	-0.08	0.1608	1.018	0.0461117	0.0446426	0.533342	0.933021	-0.0580695	0.354745	0.999548	-0.0864339	0.0935226	0.55584	-0.106376	0.0497696	0.297524
959	Mx1	17857	MX dynamin-like GTPase 1	3	0	0	2358	0.36	0.04526	0.7304	0.0721214	0.0446079	0.672298	0.933021	0.630668	0.157721	1	-0.259083	0.354653	1	0.695211	0.0547754	0.31508
960	Hmgb3	15354	high mobility group box 3	3	0	0	1517	-0.37	0.01662	0.5264	0.162104	0.0444386	0.993122	0.933021	-0.358229	0.147604	0.999548	-0.16824	0.191297	0.72316	-0.591407	0.354204	0.767083
961	Rps21	66481	ribosomal protein S21	3	0	0	2181	0.36	0.03808	0.6898	0.194227	0.0445649	1	0.933021	0.852104	0.354539	1	0.108865	0.176745	0.700106	0.119344	0.211164	0.637431
962	Ube2q1	70093	ubiquitin-conjugating enzyme E2Q family member 1	3	0	0	4454	-0.08	0.1711	1.021	0.234438	0.0446859	1	0.933021	-0.0658294	0.35486	0.999548	-0.0640128	0.353784	0.843701	-0.107699	0.142263	0.522791
963	Cerk	223753	ceramide kinase	3	0	0	4778	-0.07	0.1959	1.027	0.188262	0.0446546	1	0.933021	-0.0447793	0.354777	0.999548	-0.078814	0.127895	0.635479	-0.0765957	0.277726	0.704213
964	Senp6	215351	SUMO/sentrin specific peptidase 6	3	0	0	6629	0.04	0.3536	1.077	0.272217	0.0448431	1	0.935332	0.0734644	0.319972	0.999548	-0.0704992	0.355275	0.844102	0.121812	0.200857	0.623894
965	Bach1	12013	BTB and CNC homology 1, basic leucine zipper transcription factor 1	3	0	0	1912	0.34	0.02829	0.6314	0.00318587	0.0450149	0.0863319	0.93623	0.149081	0.281181	0.999548	0.181464	0.355729	1	0.698765	0.000538649	0.0132649
966	Dennd5b	320560	DENN/MADD domain containing 5B	3	0	0	3898	0.12	0.1313	0.993	0.101478	0.0450259	0.798595	0.93623	0.10597	0.269936	0.999548	0.0769065	0.355757	0.844519	0.162885	0.051922	0.305813
967	Zfp414	328801	zinc finger protein 414	3	0	0	5975	0.07	0.2956	1.058	0.140556	0.0449641	0.941548	0.93623	-0.0952849	0.294578	0.999548	0.0871478	0.355595	1	0.217364	0.0769295	0.38178
968	Cfap157	227736	cilia and flagella associated protein 157	3	0	0	2267	-0.04	0.04149	0.7047	0.164874	0.0451232	1	0.937285	1.16759	0.104232	1	-0.697544	0.2766	1	-0.599597	0.356014	1
969	Zdhhc24	70605	zinc finger, DHHC domain containing 24	3	0	0	2643	-0.19	0.05813	0.7914	0.00538353	0.0452541	0.126752	0.939033	-0.0883758	0.356357	0.999548	-0.188108	0.0527387	1	-0.296995	0.00547312	0.0741247
970	Npl	74091	N-acetylneuraminate pyruvate lyase	3	0	0	3792	-0.15	0.1242	0.9885	0.0248511	0.0454165	0.363934	0.939048	-0.224692	0.356783	0.999548	-0.413907	0.0105628	1	0.198541	0.191763	0.611685
971	Cdc42ep3	260409	CDC42 effector protein (Rho GTPase binding) 3	3	0	0	5609	-0.07	0.2641	1.039	0.0504825	0.0453899	0.557415	0.939048	-0.0630903	0.356714	0.999548	0.105012	0.278486	1	-0.237792	0.0188086	0.168343
972	Cdhr1	170677	cadherin-related family member 1	3	0	0	4682	0.07	0.1885	1.041	0.0872022	0.0455817	0.741071	0.939048	0.169651	0.357215	0.999548	0.244719	0.0505546	1	-0.202865	0.222019	0.646539
973	Rell2	225392	RELT-like 2	3	0	0	6724	0.01	0.3622	1.081	0.108787	0.045461	0.82969	0.939048	0.089139	0.146734	0.999548	0.0745863	0.3569	0.844519	-0.128756	0.105341	0.448548
974	Chmp4b	75608	charged multivesicular body protein 4B	3	0	0	1261	0.54	0.01077	0.4253	0.132807	0.0455496	0.915758	0.939048	0.424067	0.279842	1	0.373703	0.357131	1	0.837828	0.074074	0.372742
975	Clpb	20480	ClpB caseinolytic peptidase B	3	0	0	7425	0.01	0.4257	1.122	0.161772	0.045508	0.992918	0.939048	0.066197	0.357023	0.999548	-0.125819	0.0997505	0.569809	0.0767479	0.279954	0.706312
976	Plekha8	231999	pleckstrin homology domain containing, family A (phosphoinositide binding specific) member 8	3	0	0	4656	-0.09	0.1865	1.025	0.200217	0.0455382	1	0.939048	0.143531	0.219576	0.999548	-0.161023	0.357102	1	-0.258197	0.177013	0.588248
977	Gng7	14708	guanine nucleotide binding protein (G protein), gamma 7	3	0	0	3594	0.13	0.1114	0.9593	0.0011377	0.0456851	0.0402034	0.939519	0.0958783	0.357485	0.999548	0.214977	0.000135602	0.00805117	0.0832643	0.319754	0.74664
978	Pard6g	93737	par-6 family cell polarity regulator gamma	3	0	0	4176	0.17	0.1508	1.012	0.0593549	0.045698	0.610542	0.939519	-0.120489	0.357519	0.999548	0.27658	0.0841702	1	0.365909	0.0775928	0.383642
979	Pde4d	238871	phosphodiesterase 4D, cAMP specific	3	0	0	5144	-0.05	0.2252	1.032	0.110694	0.0458539	0.835611	0.94176	-0.142801	0.115802	0.999548	-0.130836	0.136516	0.64633	0.117054	0.357925	0.769364
980	Topbp1	235559	topoisomerase (DNA) II binding protein 1	3	0	0	5532	0.05	0.2575	1.056	0.0593907	0.046031	0.610542	0.943471	0.201428	0.0714871	0.999548	-0.199015	0.0912144	1	0.132981	0.358385	0.76954
981	Prkca	18750	protein kinase C, alpha	3	0	0	6020	-0.03	0.2995	1.043	0.346732	0.0460225	1	0.943471	-0.110011	0.358363	0.999548	-0.0761678	0.341829	0.834682	0.0888656	0.282419	0.709821
982	Cetn3	12626	centrin 3	3	0	0	626.9	1.03	0.001929	0.2242	0.0697915	0.0461683	0.661527	0.945149	0.858989	0.0706134	0.999548	0.0863642	0.358741	0.844519	2.13364	0.115504	0.470443
983	Chmp2a	68953	charged multivesicular body protein 2A	3	0	0	4879	0.07	0.2039	1.045	0.365136	0.0462069	1	0.945149	0.0672984	0.324655	0.999548	0.0657761	0.358841	0.844519	0.0809233	0.325672	0.748903
984	Slc25a33	70556	solute carrier family 25, member 33	3	0	0	5340	-0.06	0.2414	1.037	0.119128	0.046285	0.871654	0.945785	-0.195244	0.0504702	0.985084	-0.0711501	0.359043	0.844519	0.0762355	0.347764	0.761919
985	Ddit4	74747	DNA-damage-inducible transcript 4	3	0	0	1863	-0.31	0.02669	0.6154	2.43e-06	0.0473396	0.000230237	0.94749	-0.0853069	0.36175	0.999548	-0.247413	0.00705487	0.144659	-0.598609	5.18e-06	0.000307797
986	Klhl25	207952	kelch-like 25	3	0	0	2735	-0.2	0.06262	0.8108	4.97e-06	0.0473646	0.000442176	0.94749	-0.214014	1.15e-05	0.00708738	-0.0548233	0.361813	0.846777	-0.324184	0.00706258	0.0876177
987	Spata2l	78779	spermatogenesis associated 2-like	3	0	0	2813	0.23	0.06649	0.8273	8.98e-06	0.0470057	0.000728399	0.94749	0.546574	5.01e-07	0.000554322	0.0735468	0.360897	0.845835	0.0733787	0.317051	0.744782
988	Klf11	194655	Kruppel-like factor 11	3	0	0	2650	0.25	0.05846	0.8068	0.000160381	0.0467285	0.00843178	0.94749	0.171587	0.0797012	0.999548	0.0988316	0.360186	1	0.470208	5.38e-05	0.00212389
989	Lpcat4	99010	lysophosphatidylcholine acyltransferase 4	3	0	0	2707	-0.19	0.06122	0.8082	0.000195517	0.0466899	0.00995256	0.94749	-0.085136	0.360087	0.999548	-0.156209	0.063239	0.478403	-0.324821	8.53e-05	0.00307186
990	Kif3a	16568	kinesin family member 3A	3	0	0	5509	-0.08	0.2556	1.041	0.000627254	0.0469294	0.0248272	0.94749	0.0424345	0.360702	0.999548	-0.099057	0.0393289	0.387228	-0.16967	0.000537862	0.0132649
991	Crhr1	12921	corticotropin releasing hormone receptor 1	3	0	0	2357	0.28	0.04521	0.7302	0.00671796	0.0471655	0.147144	0.94749	0.142568	0.361306	0.999548	0.446776	0.00259445	1	0.23891	0.144584	0.527106
992	Tmeff2	56363	transmembrane protein with EGF-like and two follistatin-like domains 2	3	0	0	3808	-0.11	0.1253	0.9883	0.0423551	0.0474994	0.507832	0.94749	-0.0524148	0.362156	0.999548	-0.100167	0.074288	0.516152	-0.173344	0.054688	0.314992
993	1700017B05Rik	74211	RIKEN cDNA 1700017B05 gene	3	0	0	3995	-0.13	0.138	1.001	0.0679994	0.0474228	0.653256	0.94749	-0.348912	0.0400325	0.942383	-0.202537	0.194702	1	0.174971	0.361962	0.772551
994	Plppr5	75769	phospholipid phosphatase related 5	3	0	0	4281	0.09	0.1583	1.021	0.0734736	0.047488	0.681635	0.94749	0.0933979	0.117028	0.999548	0.106634	0.074212	0.516152	0.0755332	0.362127	0.772582
995	Ndufb4	68194	NADH:ubiquinone oxidoreductase subunit B4	3	0	0	490.2	-1.21	0.00101	0.2093	0.0894254	0.0473323	0.750953	0.94749	-2.72712	0.0653336	1	-1.49959	0.361731	1	0.601767	0.175869	0.586814
996	Top1mt	72960	DNA topoisomerase 1, mitochondrial	3	0	0	5727	0.06	0.2741	1.058	0.099143	0.0464794	0.787581	0.94749	-0.179934	0.169505	0.999548	0.106235	0.359545	1	0.246548	0.0791054	0.387163
997	Ppm1h	319468	protein phosphatase 1H (PP2C domain containing)	3	0	0	6317	-0.05	0.3257	1.054	0.105828	0.0466672	0.817245	0.94749	0.0556086	0.360029	0.999548	-0.0590357	0.280026	0.800486	-0.14804	0.0525641	0.307972
998	Spsb4	211949	splA/ryanodine receptor domain and SOCS box containing 4	3	0	0	6132	0	0.3094	1.061	0.110646	0.0474938	0.835611	0.94749	-0.262981	0.0630719	0.999548	0.162429	0.24757	1	0.115094	0.362142	0.772582
999	Abat	268860	4-aminobutyrate aminotransferase	3	0	0	3431	-0.13	0.1012	0.9535	0.133504	0.0472419	0.917427	0.94749	-0.0822868	0.361501	0.999548	-0.101274	0.197071	0.730413	-0.194414	0.104728	0.44695
1000	Avl9	78937	AVL9 cell migration associated	3	0	0	6260	0.01	0.3207	1.063	0.155794	0.0465489	0.980808	0.94749	0.108442	0.312732	0.999548	0.0942528	0.359724	1	-0.161374	0.0836814	0.399365
1001	Iqub	214704	IQ motif and ubiquitin domain containing	3	0	0	1666	-0.39	0.02065	0.5751	0.34611	0.0474941	1	0.94749	-0.525331	0.279056	1	-0.351402	0.362143	1	-0.281572	0.34125	0.757603
1002	Strap	20901	serine/threonine kinase receptor associated protein	3	0	0	1938	-0.46	0.02918	0.6281	0.292014	0.0466031	1	0.94749	-1.25269	0.233509	0.999548	-0.0532854	0.359864	0.84476	-0.0774684	0.30578	0.733157
1003	Phf8	320595	PHD finger protein 8	3	0	0	3566	0.13	0.1096	0.9566	0.242075	0.046687	1	0.94749	0.104327	0.33502	0.999548	0.155951	0.155972	1	0.124074	0.36008	0.771401
1004	Phf20l1	239510	PHD finger protein 20-like 1	3	0	0	4011	-0.09	0.1391	1.002	0.234305	0.0473041	1	0.94749	-0.0828422	0.27485	0.999548	-0.103937	0.179512	0.70533	-0.0924999	0.361659	0.772325
1005	Mphosph6	68533	M phase phosphoprotein 6	3	0	0	5373	-0.05	0.2441	1.039	0.255423	0.0468162	1	0.94749	-0.147555	0.203339	0.999548	-0.0966689	0.280343	1	0.0861273	0.360412	0.771595
1006	Poc5	67463	POC5 centriolar protein	3	0	0	5446	-0.06	0.2502	1.04	0.204088	0.0472017	1	0.94749	0.103452	0.361398	0.999548	-0.111171	0.301958	1	-0.186734	0.131095	0.500923
1007	Pias3	229615	protein inhibitor of activated STAT 3	3	0	0	6024	-0.05	0.2999	1.044	0.202039	0.0467549	1	0.94749	0.0851534	0.360254	0.999548	-0.133228	0.117766	0.616247	-0.0945186	0.331867	0.753031
1008	4930503L19Rik	269033	RIKEN cDNA 4930503L19 gene	3	0	0	9050	0	0.571	1.076	0.215091	0.0468601	1	0.94749	-0.129312	0.360524	0.999548	-0.141256	0.350289	1	0.285312	0.123137	0.486044
1009	Adam4	11498	a disintegrin and metallopeptidase domain 4	3	0	0	1380	-0.45	0.01331	0.4839	0.290603	0.0476336	1	0.949226	-1.46734	0.362497	1	1.03498	0.240662	1	-0.925122	0.292129	1
1010	Polr2l	66491	polymerase (RNA) II (DNA directed) polypeptide L	3	0	0	836.1	0.04	0.00398	0.2817	0.23389	0.0477413	1	0.950431	-3.42104	0.235884	1	3.38734	0.36277	1	0.1609	0.207928	0.632336
1011	Magi2	50791	membrane associated guanylate kinase, WW and PDZ domain containing 2	3	0	0	2917	-0.16	0.07188	0.8389	0.0520747	0.0479517	0.567516	0.951027	-0.101983	0.363302	0.999548	-0.192783	0.113588	0.610303	-0.180273	0.0472455	0.289475
1012	Slc13a5	237831	solute carrier family 13 (sodium-dependent citrate transporter), member 5	3	0	0	2671	-0.13	0.05949	0.8012	0.0528465	0.0479605	0.571766	0.951027	0.825114	0.11818	1	-0.3722	0.363324	1	-0.839496	0.0463333	0.286495
1013	Csnk1g3	70425	casein kinase 1, gamma 3	3	0	0	5502	-0.05	0.2549	1.041	0.151897	0.0478311	0.970726	0.951027	-0.173368	0.102401	0.999548	0.131083	0.243703	1	-0.11921	0.362997	0.772661
1014	Cmbl	69574	carboxymethylenebutenolidase-like (Pseudomonas)	3	0	0	3521	-0.17	0.1067	0.9672	0.184732	0.0479347	1	0.951027	0.308992	0.363259	1	-0.353295	0.258578	1	-0.474414	0.130255	0.499338
1015	Tas1r2	83770	taste receptor, type 1, member 2	3	0	0	3710	-0.11	0.1188	0.9839	0.0203537	0.0480633	0.321992	0.95165	-0.0559693	0.363584	0.999548	-0.120475	0.0249814	0.309103	-0.160468	0.0612734	0.332815
1016	Cisd1	52637	CDGSH iron sulfur domain 1	3	0	0	7202	-0.02	0.4054	1.111	0.173362	0.0480866	1	0.95165	-0.0534313	0.363642	0.999548	0.0742787	0.162715	0.686992	-0.0790918	0.187387	0.605255
1017	Lima1	65970	LIM domain and actin binding 1	3	0	0	2614	0.21	0.05677	0.8021	0.019817	0.0483046	0.317959	0.953117	0.246739	0.0609699	0.999548	0.253919	0.024207	1	0.135429	0.364191	0.774111
1018	Mtfr1l	76824	mitochondrial fission regulator 1-like	3	0	0	5263	-0.05	0.235	1.033	0.169697	0.0482238	1	0.953117	-0.0550222	0.188039	0.999548	-0.0358632	0.363988	0.84858	-0.0675433	0.156751	0.552519
1019	Psmc3	19182	proteasome (prosome, macropain) 26S subunit, ATPase 3	3	0	0	5383	-0.05	0.2449	1.039	0.347948	0.0483503	1	0.953117	-0.0504623	0.262918	0.999548	-0.0385678	0.364306	0.84858	-0.0571504	0.36344	0.772976
1020	Hnrnpab	15384	heterogeneous nuclear ribonucleoprotein A/B	3	0	0	7852	0.02	0.4644	1.142	0.309318	0.0482962	1	0.953117	-0.0462826	0.36417	0.999548	0.0364293	0.356648	0.844519	0.0722297	0.218265	0.643795
1021	Fndc4	64339	fibronectin type III domain containing 4	3	0	0	3906	0.12	0.1319	0.9945	0.0875403	0.0484786	0.743316	0.954359	0.0776573	0.364628	0.999548	0.103458	0.222416	0.759902	0.165688	0.0497124	0.297524
1022	Pxn	19303	paxillin	3	0	0	5175	-0.05	0.2278	1.032	0.114065	0.0485082	0.84976	0.954359	-0.203678	0.0908827	0.999548	-0.0957323	0.364702	1	0.155399	0.178375	0.590625
1023	Gamt	14431	guanidinoacetate methyltransferase	3	0	0	3621	-0.11	0.1131	0.9808	0.236015	0.0487844	1	0.958854	-0.100679	0.365393	0.999548	-0.0998575	0.253695	0.783253	-0.136099	0.194777	0.613902
1024	Wrap73	59002	WD repeat containing, antisense to Trp73	3	0	0	4642	-0.07	0.1854	1.026	0.0213063	0.0489452	0.33014	0.960138	-0.320431	0.0165125	0.711166	-0.116256	0.365794	1	0.236093	0.0978008	0.430735
1025	Tal1	21349	T cell acute lymphocytic leukemia 1	3	0	0	1533	-0.18	0.01704	0.5303	0.31324	0.0489314	1	0.960138	-0.698806	0.36576	1	1.43609	0.232301	1	-1.29076	0.340958	1
1026	Prrt2	69017	proline-rich transmembrane protein 2	3	0	0	2756	-0.3	0.06365	0.8115	2.28e-13	0.0497252	8.98e-11	0.960478	0.0648809	0.367727	0.999548	-0.284678	2.76e-05	0.00211023	-0.684165	3.34e-11	8.37e-09
1027	Ctrb1	66473	chymotrypsinogen B1	3	0	0	995.1	0.67	0.006093	0.3347	0.00706991	0.0494896	0.152526	0.960478	0.264961	0.367145	1	1.02212	0.00501632	1	0.709966	0.0784431	0.38546
1028	Angel2	52477	angel homolog 2	3	0	0	6022	-0.04	0.2997	1.043	0.016027	0.049609	0.274249	0.960478	-0.0707387	0.36744	0.999548	0.115701	0.0748916	0.516889	-0.173596	0.0148385	0.144221
1029	Rilpl1	75695	Rab interacting lysosomal protein-like 1	3	0	0	2700	-0.18	0.06086	0.8077	0.0298615	0.0497268	0.41125	0.960478	-0.116096	0.367731	0.999548	-0.153273	0.18274	1	-0.262745	0.0137069	0.136324
1030	Stk38	106504	serine/threonine kinase 38	3	0	0	5520	0.09	0.2564	1.056	0.0371274	0.0496903	0.469215	0.960478	-0.0869584	0.367641	0.999548	0.116655	0.220274	0.759208	0.236263	0.0152117	0.146622
1031	Lasp1	16796	LIM and SH3 protein 1	3	0	0	6862	-0.02	0.3746	1.092	0.0461217	0.0493931	0.533342	0.960478	-0.0871569	0.0356397	0.918959	-0.0359176	0.366906	0.849927	0.0674977	0.12631	0.490265
1032	Olfml3	99543	olfactomedin-like 3	3	0	0	1355	0.48	0.01276	0.4555	0.0487384	0.0490647	0.548702	0.960478	0.356797	0.366092	1	0.577178	0.0552517	1	0.499993	0.0880368	0.409461
1033	Plagl1	22634	pleiomorphic adenoma gene-like 1	3	0	0	5233	0.06	0.2325	1.052	0.0544945	0.0495426	0.58036	0.960478	0.236376	0.174477	0.999548	-0.223379	0.0323843	1	0.153025	0.367276	0.776691
1034	Setd3	52690	SET domain containing 3	3	0	0	701.6	1.55	0.002572	0.2416	0.133374	0.0490196	0.917427	0.960478	4.71794	0.311475	1	0.0556559	0.365979	0.849927	-0.125652	0.0653559	0.344886
1035	Znrd1as	76416	zinc ribbon domain containing 1, antisense	3	0	0	3846	-0.15	0.1278	0.9899	0.216123	0.0494918	1	0.960478	-0.339826	0.222981	1	0.216179	0.367151	1	-0.32116	0.191405	0.611282
1036	Myl6b	216459	myosin, light polypeptide 6B	3	0	0	4670	0.11	0.1875	1.041	0.219907	0.0494745	1	0.960478	-0.173989	0.367108	0.999548	0.251091	0.2673	1	0.263469	0.164184	0.566073
1037	Ints11	71957	integrator complex subunit 11	3	0	0	5914	-0.04	0.2903	1.042	0.210181	0.0496744	1	0.960478	-0.106755	0.165406	0.999548	-0.0807871	0.246516	0.775647	0.067441	0.367602	0.776967
1038	Tspan4	64540	tetraspanin 4	3	0	0	4916	0.11	0.2068	1.043	0.168738	0.049281	1	0.960478	0.15878	0.318701	0.999548	-0.114055	0.366629	1	0.276713	0.0910223	0.416824
1039	Iqgap2	544963	IQ motif containing GTPase activating protein 2	3	0	0	4981	0.09	0.212	1.046	0.267602	0.0495413	1	0.960478	0.21979	0.310531	0.999548	-0.160561	0.367273	1	0.199701	0.19458	0.613902
1040	Amd1	11702	S-adenosylmethionine decarboxylase 1	3	0	0	5300	0.06	0.238	1.055	0.234748	0.0494665	1	0.960478	0.0450475	0.367088	0.999548	0.0535754	0.333068	0.827528	0.0788428	0.146392	0.531243
1041	Enoph1	67870	enolase-phosphatase 1	3	0	0	7238	0.02	0.4087	1.112	0.388604	0.0492341	1	0.960478	0.0592395	0.366512	0.999548	0.0538378	0.347026	0.839035	-0.0561368	0.33402	0.753727
1042	Dll4	54485	delta like canonical Notch ligand 4	3	0	0	477.2	-0.7	0.0009394	0.2009	0.00798095	0.049968	0.168387	0.960523	-2.64764	0.0420272	1	-1.63373	0.368325	1	2.17244	0.0108652	1
1043	Npepl1	228961	aminopeptidase-like 1	3	0	0	2299	-0.25	0.04279	0.7127	0.0967009	0.0498707	0.778369	0.960523	-0.221039	0.336181	0.999548	-0.380063	0.0375824	1	-0.142731	0.368085	0.777423
1044	Mad1l1	17120	MAD1 mitotic arrest deficient 1-like 1	3	0	0	5278	0.09	0.2362	1.052	0.16132	0.0499216	0.991613	0.960523	-0.117786	0.36821	0.999548	0.188693	0.151947	1	0.186147	0.177441	0.589058
1045	Atp6v1fnb	668210	Atp6v1f neighbor	3	0	0	1864	-0.31	0.02672	0.6154	0.235068	0.0498561	1	0.960523	-0.652385	0.368049	1	0.807506	0.22958	1	-1.0932	0.212294	1
1046	Kirrel2	243911	kirre like nephrin family adhesion molecule 2	3	0	0	2030	-0.27	0.0324	0.6463	0.209436	0.0498964	1	0.960523	-1.03854	0.228433	1	0.803017	0.177233	1	-0.566714	0.368149	1
1047	Prph	19132	peripherin	3	0	0	1635	0.42	0.01976	0.5383	0.00103765	0.0502323	0.037525	0.96154	0.386526	0.018096	0.714103	0.14699	0.368973	1	0.731191	0.00207948	0.0366591
1048	Heca	380629	hdc homolog, cell cycle regulator	3	0	0	3684	0.13	0.1171	0.9743	0.0122091	0.05026	0.226466	0.96154	0.104921	0.208803	0.999548	0.0746328	0.369041	0.849927	0.223195	0.00373842	0.0561466
1049	Gsr	14782	glutathione reductase	3	0	0	3949	-0.1	0.1348	0.9992	0.08642	0.0502531	0.738168	0.96154	-0.0731507	0.369024	0.999548	-0.0705901	0.255902	0.784526	-0.160476	0.0419147	0.268527
1050	Begain	380785	brain-enriched guanylate kinase-associated	3	0	0	5624	-0.05	0.2653	1.039	0.121396	0.0501646	0.878974	0.96154	0.123724	0.368807	0.999548	-0.100641	0.239095	0.768713	-0.18419	0.0734802	0.371206
1051	Nectin2	19294	nectin cell adhesion molecule 2	3	0	0	6364	0.05	0.3299	1.066	0.154809	0.050158	0.978255	0.96154	-0.0809839	0.368791	0.999548	0.0853936	0.286782	0.804248	0.156007	0.0881564	0.409868
1052	Tmx2	66958	thioredoxin-related transmembrane protein 2	3	0	0	4631	-0.07	0.1845	1.026	0.00478654	0.0507491	0.116095	0.962208	-0.0414171	0.370234	0.999548	-0.0751519	0.0455055	0.415209	-0.104298	0.00527766	0.0722978
1053	Pcsk2	18549	proprotein convertase subtilisin/kexin type 2	3	0	0	6620	0.01	0.3528	1.077	0.0109595	0.0505372	0.20967	0.962208	0.138127	0.0215424	0.759059	0.043103	0.369718	0.849927	-0.140731	0.0315245	0.22945
1054	Mdk	17242	midkine	3	0	0	2934	-0.16	0.0728	0.8447	0.0194502	0.0504188	0.314748	0.962208	-0.0945037	0.369429	0.999548	-0.160041	0.0397213	0.388489	-0.213583	0.0357503	0.246454
1055	Cul2	71745	cullin 2	3	0	0	4588	-0.07	0.1812	1.023	0.0327972	0.0505997	0.436435	0.962208	-0.0864267	0.0804792	0.999548	-0.040693	0.36987	0.849927	-0.0954755	0.035055	0.243631
1056	Pear1	73182	platelet endothelial aggregation receptor 1	3	0	0	988.8	-0.67	0.006001	0.3842	0.098825	0.0508411	0.786648	0.962208	-1.39617	0.0392031	1	-0.350151	0.33042	1	-0.252598	0.370457	0.778723
1057	Nkapd1	270156	NKAP domain containing 1	3	0	0	4209	-0.34	0.1531	1.013	0.141724	0.0504875	0.945383	0.962208	-1.30577	0.369597	1	0.139585	0.152146	0.67344	0.14268	0.145095	0.528035
1058	Vps45	22365	vacuolar protein sorting 45	3	0	0	4575	-0.07	0.1802	1.023	0.159717	0.050855	0.98708	0.962208	-0.090583	0.0948555	0.999548	-0.048671	0.370491	0.849927	-0.0802363	0.278216	0.704831
1059	Cep126	234915	centrosomal protein 126	3	0	0	4056	-0.04	0.1423	1.002	0.163981	0.0506816	0.997252	0.962208	-0.441141	0.233383	1	0.566597	0.117857	1	-0.231255	0.37007	0.778453
1060	Lnpep	240028	leucyl/cystinyl aminopeptidase	3	0	0	234.5	1.6	0.0001287	0.08084	0.339149	0.0507676	1	0.962208	0.333415	0.274567	1	4.1803	0.370279	1	0.29187	0.327258	0.749715
1061	Zeb2	24136	zinc finger E-box binding homeobox 2	3	0	0	4033	0.11	0.1406	0.9989	0.166683	0.0507018	1	0.962208	0.120837	0.0981856	0.999548	0.0696877	0.370119	0.849927	0.127797	0.287209	0.714167
1062	Nedd4l	83814	neural precursor cell expressed, developmentally down-regulated gene 4-like	3	0	0	4129	-0.09	0.1474	1.008	0.165071	0.0506305	1	0.962208	-0.130433	0.157331	0.999548	-0.0575529	0.369945	0.849927	-0.0808371	0.176671	0.58762
1063	Sgta	52551	small glutamine-rich tetratricopeptide repeat (TPR)-containing, alpha	3	0	0	5544	-0.04	0.2585	1.039	0.280922	0.0508692	1	0.962208	-0.0439969	0.247622	0.999548	-0.0447787	0.262334	0.785531	-0.0416962	0.370526	0.778723
1064	Cdc42ep1	104445	CDC42 effector protein (Rho GTPase binding) 1	3	0	0	2403	-0.25	0.04719	0.7383	0.21911	0.0509886	1	0.96356	-0.435873	0.12219	0.999548	-0.165507	0.353512	1	-0.140468	0.370815	0.778993
1065	Cetn4	207175	centrin 4	3	0	0	912.5	0.73	0.004933	0.3024	0.153273	0.0510671	0.974964	0.964138	0.859242	0.146656	1	0.891749	0.168784	1	0.436539	0.371006	1
1066	Slc13a3	114644	solute carrier family 13 (sodium-dependent dicarboxylate transporter), member 3	3	0	0	1934	-0.3	0.02904	0.6299	0.00154692	0.0512836	0.0509899	0.965371	-0.199006	0.371529	0.999548	-0.211881	0.176594	1	-0.494481	0.00034164	0.00941057
1067	Wdr54	75659	WD repeat domain 54	3	0	0	3652	-0.18	0.115	0.9838	0.0538783	0.0514392	0.577319	0.965371	-0.0926056	0.3106	0.999548	0.226255	0.371904	1	-0.680948	0.0176863	0.161539
1068	Adam9	11502	a disintegrin and metallopeptidase domain 9 (meltrin gamma)	3	0	0	4141	0.1	0.1482	1.008	0.0647183	0.0512589	0.636621	0.965371	0.0689364	0.37147	0.999548	0.11814	0.0618088	0.474292	0.115085	0.11468	0.468583
1069	Haus2	66296	HAUS augmin-like complex, subunit 2	3	0	0	2699	-0.28	0.06082	0.8083	0.0951909	0.0512892	0.771776	0.965371	-0.391788	0.241851	1	-0.71112	0.0505946	1	0.275751	0.371543	0.780008
1070	Yme1l1	27377	YME1-like 1 (S. cerevisiae)	3	0	0	691.4	-1.39	0.002478	0.2738	0.2454	0.0515165	1	0.965371	-0.0665375	0.230435	0.999548	-4.16468	0.372091	1	0.0730613	0.224382	0.649593
1071	Coa6	67892	cytochrome c oxidase assembly factor 6	3	0	0	1312	0.51	0.01183	0.4404	0.360653	0.0515032	1	0.965371	0.549182	0.300199	1	0.466671	0.332244	1	0.501316	0.372059	1
1072	Tmem35b	100039968	transmembrane protein 35B	3	0	0	1881	-0.31	0.02727	0.619	0.308514	0.0514607	1	0.965371	-0.39719	0.212288	1	-0.269056	0.35741	1	-0.257962	0.371956	0.780707
1073	Rnf130	59044	ring finger protein 130	3	0	0	6177	-0.04	0.3133	1.048	0.351859	0.0514779	1	0.965371	0.113517	0.322166	0.999548	-0.120456	0.296291	1	-0.102073	0.371998	0.780707
1074	Plcd3	72469	phospholipase C, delta 3	3	0	0	1248	0.55	0.01051	0.4191	4.42e-05	0.051754	0.00280542	0.967593	0.365428	0.372662	1	0.47281	0.1092	1	0.820247	8.6e-06	0.000465848
1075	Vps50	73288	VPS50 EARP/GARPII complex subunit	3	0	0	3450	-0.13	0.1023	0.957	0.00226297	0.0517795	0.0673098	0.967593	-0.056149	0.372723	0.999548	-0.11184	0.068489	0.495176	-0.222844	0.00139091	0.0268539
1076	Krit1	79264	KRIT1, ankyrin repeat containing	3	0	0	5959	-0.04	0.2942	1.039	0.240466	0.0517264	1	0.967593	0.12083	0.255313	0.999548	-0.101686	0.372595	1	-0.146115	0.195653	0.61456
1077	Prkcsh	19089	protein kinase C substrate 80K-H	3	0	0	3676	-0.11	0.1166	0.9823	0.012277	0.0518802	0.226954	0.96812	-0.127657	0.0962228	0.999548	-0.142427	0.00808402	0.1563	-0.0521481	0.372964	0.781965
1078	Med22	20933	mediator complex subunit 22	3	0	0	4622	0.09	0.1838	1.04	0.222395	0.051904	1	0.96812	0.186842	0.328494	0.999548	-0.265436	0.373021	1	0.346116	0.133874	0.505775
1079	Slc35f6	74919	solute carrier family 35, member F6	3	0	0	7376	0.02	0.4212	1.119	0.416079	0.0519704	1	0.96846	0.072285	0.348788	0.999548	-0.0583151	0.370491	0.849927	0.0509303	0.37318	0.782161
1080	Rnpep	215615	arginyl aminopeptidase (aminopeptidase B)	3	0	0	6717	-0.03	0.3615	1.081	0.126534	0.0520335	0.892712	0.968738	-0.0951246	0.149927	0.999548	0.0691832	0.123082	0.62693	-0.0617642	0.373331	0.782349
1081	4931428F04Rik	74356	RIKEN cDNA 4931428F04 gene	3	0	0	5842	0.08	0.284	1.057	0.00721433	0.052558	0.155475	0.974954	-0.045947	0.374582	0.999548	0.119377	0.00730101	0.144999	0.152527	0.0541808	0.313138
1082	Pycrl	66194	pyrroline-5-carboxylate reductase-like	3	0	0	5948	0.08	0.2933	1.056	0.0134704	0.052541	0.242937	0.974954	-0.0834458	0.374541	0.999548	0.0768918	0.279926	0.800486	0.238733	0.00311541	0.0493409
1083	Ice1	218333	interactor of little elongation complex ELL subunit 1	3	0	0	8545	0	0.5267	1.095	0.0697066	0.0525613	0.66143	0.974954	0.175705	0.0310753	0.888417	-0.0951108	0.25093	0.778345	-0.0655822	0.374589	0.783123
1084	Aptx	66408	aprataxin	3	0	0	3477	0.13	0.104	0.9385	0.33276	0.0524537	1	0.974954	0.135742	0.235185	0.999548	0.128307	0.374333	1	0.134839	0.365507	0.775103
1085	Tgfbr3	21814	transforming growth factor, beta receptor III	3	0	0	1825	-0.31	0.02545	0.6098	0.150673	0.0526638	0.966015	0.975306	-0.266445	0.374833	1	-0.270587	0.325926	1	-0.392112	0.0732472	0.370615
1086	Crls1	66586	cardiolipin synthase 1	3	0	0	6584	0.04	0.3496	1.075	0.28202	0.0526773	1	0.975306	-0.0879097	0.371375	0.999548	0.118423	0.17403	0.696832	0.0898792	0.374865	0.783123
1087	Syp	20977	synaptophysin	3	0	0	7719	0	0.4524	1.135	0.158865	0.0527854	0.984391	0.975511	0.0605404	0.122823	0.999548	0.0301241	0.375121	0.851918	-0.076873	0.210489	0.636145
1088	Hmgb1	15289	high mobility group box 1	3	0	0	3273	0.21	0.09169	0.9055	0.371386	0.0527775	1	0.975511	0.460085	0.323543	1	0.0657803	0.375102	0.851918	0.0888191	0.32234	0.747702
1089	Dlg3	53310	discs large MAGUK scaffold protein 3	3	0	0	3988	-0.1	0.1375	1.003	0.00465521	0.0529852	0.113457	0.976511	-0.129721	0.0427216	0.953434	-0.0404502	0.375594	0.852409	-0.126995	0.00535391	0.0731072
1090	Mapkapk3	102626	mitogen-activated protein kinase-activated protein kinase 3	3	0	0	4008	-0.15	0.1389	1.002	0.0299644	0.0529797	0.411831	0.976511	-0.353918	0.0185561	0.717663	-0.168635	0.132769	1	0.0863646	0.375581	0.784164
1091	Faim2	72393	Fas apoptotic inhibitory molecule 2	3	0	0	4372	-0.05	0.165	1.02	0.172839	0.0529575	1	0.976511	-0.266404	0.257478	0.999548	-0.183174	0.375528	1	0.29872	0.114139	0.467118
1092	Dmap1	66233	DNA methyltransferase 1-associated protein 1	3	0	0	5639	0.08	0.2666	1.057	0.0610102	0.0531132	0.617519	0.976546	-0.0700359	0.375896	0.999548	0.119957	0.155493	0.678874	0.1978	0.0415007	0.266543
1093	Adamts3	330119	a disintegrin-like and metallopeptidase (reprolysin type) with thrombospondin type 1 motif, 3	3	0	0	2919	-0.16	0.07201	0.8388	0.161259	0.0531263	0.991613	0.976546	-0.103501	0.375927	0.999548	-0.15695	0.1966	1	-0.208689	0.134246	0.505808
1094	Aggf1	66549	angiogenic factor with G patch and FHA domains 1	3	0	0	3432	0.14	0.1012	0.9299	0.169767	0.0531814	1	0.976546	0.10449	0.376057	0.999548	0.185544	0.108031	1	0.122164	0.264252	0.689689
1095	Azin1	54375	antizyme inhibitor 1	3	0	0	7703	0	0.451	1.128	0.303513	0.0531658	1	0.976546	-0.0446589	0.37602	0.999548	-0.0312825	0.333097	0.827528	0.0704363	0.219097	0.644174
1096	Tlr6	21899	toll-like receptor 6	3	0	0	1445	-0.46	0.01483	0.497	0.313102	0.0533701	1	0.978627	-0.481205	0.376501	1	-0.482128	0.271885	1	-0.424586	0.282792	0.710008
1097	Gys1	14936	glycogen synthase 1, muscle	3	0	0	6368	-0.04	0.3302	1.053	0.325476	0.0533921	1	0.978627	0.0785049	0.376553	0.999548	-0.0955558	0.255666	0.784526	-0.102322	0.321575	0.747702
1098	Emilin2	246707	elastin microfibril interfacer 2	3	0	0	530.4	1.03	0.001245	0.1956	0.0341654	0.0534989	0.446661	0.979692	0.591464	0.310467	1	0.516074	0.376803	1	1.9667	0.00942008	1
1099	Rab42	242681	RAB42, member RAS oncogene family	3	0	0	1010	0.61	0.006315	0.3386	0.300053	0.0536353	1	0.981297	0.52511	0.377124	1	0.666847	0.289354	1	0.649832	0.246602	1
1100	Kcns3	238076	potassium voltage-gated channel, delayed-rectifier, subfamily S, member 3	3	0	0	2023	0.32	0.03217	0.6703	0.0089614	0.0537256	0.18164	0.982055	0.401803	0.0794161	0.999548	0.199647	0.377335	1	0.36114	0.0064941	0.0829182
1101	Parvb	170736	parvin, beta	3	0	0	3487	-0.13	0.1047	0.9626	0.00124146	0.0538076	0.0427975	0.98266	-0.0756849	0.377527	0.999548	-0.229115	0.000151458	0.00872812	-0.0824594	0.300958	0.728597
1102	Hyal1	15586	hyaluronoglucosaminidase 1	3	0	0	2020	-0.3	0.03206	0.6447	0.0027742	0.0542576	0.0782339	0.984618	-0.336334	0.171203	0.999548	-0.118996	0.378576	1	-0.456731	0.000701951	0.0163121
1103	Phlpp1	98432	PH domain and leucine rich repeat protein phosphatase 1	3	0	0	6791	-0.03	0.3682	1.085	0.0853525	0.0540623	0.735395	0.984618	0.0833919	0.378122	0.999548	-0.100519	0.0462297	0.417416	-0.06183	0.222456	0.647066
1104	Abcc4	239273	ATP-binding cassette, sub-family C (CFTR/MRP), member 4	3	0	0	3247	-0.15	0.09017	0.9157	0.169864	0.0541376	1	0.984618	-0.230917	0.0961696	0.999548	-0.0766364	0.378297	0.854319	-0.128381	0.295345	0.723765
1105	Ap4m1	11781	adaptor-related protein complex AP-4, mu 1	3	0	0	4495	-0.12	0.1742	1.023	0.201944	0.0542384	1	0.984618	-0.326942	0.127726	0.999548	0.125685	0.378532	1	-0.16565	0.290997	0.718501
1106	Mccc1	72039	methylcrotonoyl-Coenzyme A carboxylase 1 (alpha)	3	0	0	6114	0.02	0.3078	1.061	0.174328	0.0542274	1	0.984618	-0.212544	0.131618	0.999548	0.166367	0.224478	1	0.110138	0.378506	0.787512
1107	Etnk1	75320	ethanolamine kinase 1	3	0	0	6755	-0.03	0.3649	1.083	0.165908	0.054108	1	0.984618	0.0673157	0.292006	0.999548	-0.0581349	0.378228	0.854319	-0.113453	0.0938286	0.422857
1108	Faap100	71885	Fanconi anemia core complex associated protein 100	3	0	0	6826	0	0.3713	1.089	0.268715	0.0542269	1	0.984618	-0.0684669	0.203373	0.999548	-0.0687949	0.378505	0.854319	0.131633	0.290287	0.71805
1109	Pdzd11	72621	PDZ domain containing 11	3	0	0	5337	-0.07	0.2411	1.036	0.0645942	0.0544105	0.636193	0.985531	0.123933	0.275438	0.999548	-0.0969481	0.378932	1	-0.229873	0.0251603	0.203532
1110	Spock1	20745	sparc/osteonectin, cwcv and kazal-like domains proteoglycan 1	3	0	0	9569	0	0.6153	1.041	0.152622	0.0544348	0.972975	0.985531	0.0777771	0.270677	0.999548	0.0498878	0.378988	0.854319	-0.12876	0.0889461	0.411593
1111	Ror2	26564	receptor tyrosine kinase-like orphan receptor 2	3	0	0	3623	-0.2	0.1132	0.9815	0.179867	0.0544549	1	0.985531	-0.263626	0.260725	0.999548	0.181337	0.379035	1	-0.502833	0.118775	0.477781
1112	Tac1	21333	tachykinin 1	3	0	0	1470	0.45	0.01543	0.4924	5.15e-07	0.0545672	5.78e-05	0.985966	0.383808	0.0408775	0.95167	0.227417	0.379295	1	0.750507	1.52e-07	1.61e-05
1113	Pim3	223775	proviral integration site 3	3	0	0	5660	0.09	0.2684	1.057	0.00878173	0.0546751	0.178768	0.985966	-0.143203	0.118133	0.999548	0.0761762	0.379545	0.854319	0.328608	0.00423084	0.0615181
1114	Sys1	66460	SYS1 Golgi-localized integral membrane protein homolog (S. cerevisiae)	3	0	0	4557	0.08	0.1789	1.037	0.206312	0.0546277	1	0.985966	0.08357	0.223549	0.999548	0.0621086	0.379435	0.854319	0.107515	0.171577	0.580139
1115	Bcar1	12927	breast cancer anti-estrogen resistance 1	3	0	0	6700	0.05	0.36	1.08	0.218839	0.0546416	1	0.985966	-0.0609724	0.379467	0.999548	0.0691591	0.225573	0.760175	0.134004	0.186757	0.605055
1116	P4htm	74443	prolyl 4-hydroxylase, transmembrane (endoplasmic reticulum)	3	0	0	6767	-0.03	0.366	1.084	0.368789	0.0547295	1	0.986063	0.0678517	0.379671	0.999548	-0.0786854	0.341561	0.834682	-0.0843178	0.297864	0.725418
1117	Sp8	320145	trans-acting transcription factor 8	3	0	0	1235	-0.48	0.01023	0.4463	0.2416	0.0548666	1	0.987648	-0.338923	0.379988	1	-0.502598	0.306586	1	-0.591142	0.160992	0.5601
1118	Tgif2	228839	TGFB-induced factor homeobox 2	3	0	0	5038	-0.01	0.2166	1.03	0.0759761	0.055101	0.691558	0.990095	-0.200796	0.0795203	0.999548	-0.123508	0.380528	1	0.293059	0.108958	0.455988
1119	Nfatc4	73181	nuclear factor of activated T cells, cytoplasmic, calcineurin dependent 4	3	0	0	542.3	-0.88	0.001321	0.2195	0.297201	0.0550662	1	0.990095	-1.74281	0.370127	1	-2.27209	0.188016	1	1.36492	0.380448	1
1120	Acaca	107476	acetyl-Coenzyme A carboxylase alpha	3	0	0	3624	0.13	0.1132	0.9632	0.149738	0.0552052	0.963794	0.990197	0.0915854	0.380768	0.999548	0.144538	0.0977403	0.566027	0.148577	0.23819	0.665876
1121	Siah3	380918	siah E3 ubiquitin protein ligase family member 3	3	0	0	2261	0.23	0.04123	0.702	0.252934	0.0551607	1	0.990197	0.595664	0.380665	1	0.778424	0.195163	1	-0.688472	0.272126	1
1122	Fosb	14282	FBJ osteosarcoma oncogene B	3	33.3333	0	320.6	1.28	0.0003141	0.1035	1.15e-11	0.0553209	3.27e-09	0.990505	0.860058	0.381033	1	0.752273	0.268214	1	2.23177	2.12e-13	6.96e-11
1123	Gpm6a	234267	glycoprotein m6a	3	0	0	5134	0.06	0.2244	1.042	0.000984797	0.0552834	0.0359978	0.990505	0.0357477	0.380947	0.999548	0.0754479	0.00045433	0.0193518	0.0818333	0.0753674	0.376258
1124	Fth1	14319	ferritin heavy polypeptide 1	3	0	0	2719	-0.21	0.06183	0.8073	6.11e-12	0.0558872	1.83e-09	0.990938	-0.0477458	0.382329	0.999548	-0.203815	5.08e-07	8.07e-05	-0.366489	5.73e-08	6.78e-06
1125	Shmt2	108037	serine hydroxymethyltransferase 2 (mitochondrial)	3	0	0	3068	-0.15	0.08006	0.8758	0.00230447	0.0557499	0.0683422	0.990938	-0.175208	0.0171579	0.714103	-0.196473	0.00553793	0.125683	-0.0765253	0.382016	0.789185
1126	Epha4	13838	Eph receptor A4	3	0	0	3133	-0.15	0.08367	0.8916	0.0127191	0.0557061	0.233129	0.990938	-0.183487	0.0595561	0.999548	-0.0628378	0.381916	0.854319	-0.200079	0.0133441	0.134121
1127	Zfp706	68036	zinc finger protein 706	3	0	0	5204	-0.06	0.2301	1.032	0.0297856	0.0555392	0.411025	0.990938	-0.0424834	0.298279	0.999548	-0.0252266	0.381534	0.854319	-0.105901	0.00806642	0.0954601
1128	Ptpre	19267	protein tyrosine phosphatase, receptor type, E	3	0	0	2871	0.18	0.06951	0.8354	0.0472524	0.055701	0.538946	0.990938	0.141383	0.381904	0.999548	0.235311	0.0284773	1	0.170779	0.156964	0.552964
1129	Zfp961	234413	zinc finger protein 961	3	0	0	5947	-0.05	0.2932	1.04	0.0683895	0.055615	0.654451	0.990938	-0.743324	0.0242859	1	0.289968	0.306787	1	0.303514	0.381708	0.789185
1130	Tet2	214133	tet methylcytosine dioxygenase 2	3	0	0	4842	0.11	0.2009	1.044	0.0798488	0.0558855	0.709152	0.990938	0.217505	0.105943	0.999548	-0.107289	0.382325	1	0.214945	0.0873274	0.407496
1131	Ing3	71777	inhibitor of growth family, member 3	3	0	0	5526	-0.05	0.257	1.041	0.111672	0.0554986	0.839721	0.990938	-0.101683	0.381441	0.999548	0.152738	0.16412	1	-0.194477	0.0915559	0.418218
1132	Cpeb1	12877	cytoplasmic polyadenylation element binding protein 1	3	0	0	2565	-0.19	0.05448	0.7775	0.146623	0.0554056	0.955641	0.990938	-0.17125	0.381228	0.999548	-0.142194	0.353137	1	-0.242503	0.0637875	0.340592
1133	Tsc22d3	14605	TSC22 domain family, member 3	3	0	0	831.5	-0.68	0.003926	0.3289	0.24574	0.0556279	1	0.990938	-0.875475	0.306241	1	-0.497445	0.381737	1	-0.673272	0.164946	1
1134	Mapre1	13589	microtubule-associated protein, RP/EB family, member 1	3	0	0	6105	0.04	0.307	1.061	0.323917	0.0558135	1	0.990938	0.0276761	0.382161	0.999548	0.0257601	0.325426	0.826606	0.0570645	0.246862	0.674901
1135	Slc29a2	13340	solute carrier family 29 (nucleoside transporters), member 2	3	0	0	5963	0.05	0.2946	1.057	0.328511	0.0559812	1	0.991731	-0.135192	0.338547	0.999548	0.113299	0.382544	1	0.184495	0.242945	0.671949
1136	Dmwd	13401	dystrophia myotonica-containing WD repeat motif	3	0	0	6896	0.03	0.3777	1.095	0.19637	0.0560351	1	0.991811	0.0663569	0.198399	0.999548	0.0664879	0.17732	0.701403	-0.0532175	0.382666	0.789612
1137	Atp5a1	11946	ATP synthase, H+ transporting, mitochondrial F1 complex, alpha subunit 1	3	0	0	4874	-0.07	0.2035	1.031	0.00121478	0.0563007	0.0421857	0.995636	-0.0345613	0.38327	0.999548	-0.0427863	0.041289	0.394622	-0.131709	0.00105949	0.0223824
1138	Trip10	106628	thyroid hormone receptor interactor 10	3	0	0	4295	0.12	0.1593	1.02	0.173872	0.0564185	1	0.996842	0.473373	0.112503	1	-0.318597	0.25813	1	0.216216	0.383537	0.790348
1139	Dpp3	75221	dipeptidylpeptidase 3	3	0	0	4578	-0.08	0.1804	1.023	0.0230473	0.0568176	0.346866	0.996886	-0.0642093	0.191344	0.999548	-0.0411557	0.384439	0.855664	-0.127556	0.00889934	0.102103
1140	Lsm6	78651	LSM6 homolog, U6 small nuclear RNA and mRNA degradation associated	3	0	0	2159	0.31	0.0372	0.6875	0.0342717	0.0565521	0.447178	0.996886	0.19472	0.383839	0.999548	0.47995	0.048912	1	0.243304	0.0589416	0.326102
1141	Zfyve19	72008	zinc finger, FYVE domain containing 19	3	0	0	7663	-0.01	0.4473	1.128	0.0726109	0.0567999	0.676233	0.996886	-0.417057	0.0237495	0.79101	0.190644	0.384399	1	0.199868	0.338821	0.756247
1142	Psmd7	17463	proteasome (prosome, macropain) 26S subunit, non-ATPase, 7	3	0	0	5122	-0.06	0.2234	1.031	0.140763	0.0566351	0.941548	0.996886	-0.0463122	0.384027	0.999548	-0.0660102	0.0972835	0.564212	-0.0536923	0.216174	0.641136
1143	Clcc1	229725	chloride channel CLIC-like 1	3	0	0	3223	-0.14	0.08881	0.9125	0.144987	0.0565835	0.95264	0.996886	-0.117206	0.267651	0.999548	-0.197937	0.0821705	1	-0.0971006	0.383911	0.790423
1144	Hacd1	30963	3-hydroxyacyl-CoA dehydratase 1	3	0	0	2870	0.18	0.06941	0.8353	0.386085	0.0567552	1	0.996886	0.182056	0.38097	0.999548	0.189042	0.286741	1	0.165186	0.384298	0.790555
1145	Fam43b	625638	family with sequence similarity 43, member B	3	0	0	3115	-0.14	0.08267	0.8871	0.353026	0.0566984	1	0.996886	-0.132831	0.38417	0.999548	-0.156882	0.252362	1	-0.127736	0.368427	0.777423
1146	Psma3	19167	proteasome (prosome, macropain) subunit, alpha type 3	3	0	0	7410	-0.02	0.4244	1.119	0.187547	0.0567618	1	0.996886	-0.0415679	0.384313	0.999548	0.0428353	0.187741	0.718452	-0.0661407	0.17362	0.584023
1147	Il1r1	16177	interleukin 1 receptor, type I	3	33.3333	0	1562	0.75	0.01777	0.5179	0	0.837482	0	1	-0.0265143	0.942595	1	0.172322	0.566949	1	2.1005	3.62e-20	3.55e-17
1148	Atf3	11910	activating transcription factor 3	3	33.3333	0	1713	0.7	0.02201	0.5617	0	0.59643	0	1	-0.0598249	0.841756	1	0.18587	0.593438	1	1.98531	1.77e-20	2.06e-17
1149	Nptxr	73340	neuronal pentraxin receptor	3	0	0	3548	-0.23	0.1084	0.9697	0	0.631843	0	1	0.0133823	0.858097	0.999548	-0.17578	2.48e-06	0.000310715	-0.532009	7.21e-15	3.07e-12
1150	Bap1	104416	Brca1 associated protein 1	3	0	0	3808	-0.13	0.1253	0.9884	0	0.278396	0	1	-0.0148445	0.652962	0.999548	-0.135417	3.82e-06	0.000424206	-0.23078	1.68e-16	9.31e-14
1151	A2m	232345	alpha-2-macroglobulin	3	33.3333	0	355.3	1.25	0.0004189	0.1221	1.11e-16	0.463413	6.38e-14	1	1.23826	0.773849	1	0.87892	0.045717	1	1.64679	3.41e-18	2.73e-15
1152	Akap5	238276	A kinase (PRKA) anchor protein 5	3	0	0	1961	-0.39	0.02998	0.6378	1.11e-16	0.660859	6.38e-14	1	-0.0309229	0.871037	0.999548	-0.289876	0.0279622	1	-0.855256	5.22e-18	3.7e-15
1153	Pfkp	56421	phosphofructokinase, platelet	3	0	0	3015	-0.23	0.07716	0.8628	2.22e-16	0.57253	1.24e-13	1	-0.0237597	0.830359	0.999548	-0.150054	0.00230056	0.0669439	-0.513684	1.23e-16	7.86e-14
1154	Cpne1	266692	copine I	3	0	33.3333	675.6	-5.71	0.002337	0.267	2.66e-15	0.86537	1.34e-12	1	-24.0537	5.9e-17	1.63e-13	6.81384	0.0557395	1	0.09521	0.952944	0.989807
1155	Nqo1	18104	NAD(P)H dehydrogenase, quinone 1	3	0	0	4251	0.22	0.1562	1.02	5.44e-15	0.16735	2.6e-12	1	-0.197964	0.0923621	0.999548	0.0529431	0.551073	0.914269	0.811622	1.3e-16	7.93e-14
1156	Neurl1a	18011	neuralized E3 ubiquitin protein ligase 1A	3	0	0	2406	-0.28	0.04733	0.7383	6.88e-15	0.687305	3.08e-12	1	-0.0159193	0.882504	0.999548	-0.197189	0.000187716	0.0105085	-0.629042	5.07e-14	1.85e-11
1157	Mras	17532	muscle and microspikes RAS	3	0	0	3296	-0.19	0.09305	0.9267	2.05e-14	0.363234	8.98e-12	1	-0.0243569	0.713502	0.999548	-0.125138	0.0278466	0.333709	-0.408213	1.35e-15	6.38e-13
1158	Prkcg	18752	protein kinase C, gamma	3	0	0	2409	-0.26	0.04745	0.7384	2.78e-14	0.190671	1.19e-11	1	-0.0541903	0.575566	0.999548	-0.270201	5.22e-06	0.000547761	-0.448903	1.22e-11	3.26e-09
1159	Plat	18791	plasminogen activator, tissue	3	0	0	4645	0.18	0.1856	1.04	6.75e-14	0.323349	2.71e-11	1	-0.113237	0.28963	0.999548	0.0388599	0.686369	0.945397	0.621034	4.72e-16	2.41e-13
1160	Ldha	16828	lactate dehydrogenase A	3	0	0	4169	-0.12	0.1502	1.011	3.4e-13	0.196128	1.32e-10	1	-0.0197029	0.581005	0.999548	-0.0648303	0.0115367	0.203642	-0.273343	7.74e-14	2.75e-11
1161	Sema3c	20348	sema domain, immunoglobulin domain (Ig), short basic domain, secreted, (semaphorin) 3C	3	0	0	3750	0.22	0.1214	0.9785	6.22e-13	0.358516	2.32e-10	1	0.0278237	0.7104	0.999548	0.045882	0.406867	0.863831	0.578378	3.4e-15	1.5e-12
1162	Lgals3	16854	lectin, galactose binding, soluble 3	3	33.3333	0	399	1.26	0.0005771	0.1365	1.12e-12	0.431537	4.02e-10	1	0.258471	0.755682	1	1.50481	0.00350366	1	2.00973	6.92e-13	2.16e-10
1163	Podn	242608	podocan	3	0	0	3196	-0.18	0.08726	0.9054	8.89e-12	0.499844	2.61e-09	1	-0.0161725	0.793618	0.999548	-0.199857	2.06e-06	0.000268383	-0.32514	1.02e-08	1.49e-06
1164	Prnp	19122	prion protein	3	0	0	4497	-0.13	0.1743	1.024	2.37e-11	0.0884484	6.44e-09	1	0.0321377	0.44555	0.999548	-0.272255	1.52e-11	4.96e-09	-0.153739	0.00697012	0.0871675
1165	Pdpn	14726	podoplanin	3	0	0	3720	0.21	0.1195	0.976	2.44e-11	0.403944	6.53e-09	1	0.0357596	0.73922	0.999548	0.0487375	0.532797	0.906808	0.53676	1.23e-13	4.15e-11
1166	Lzts1	211134	leucine zipper, putative tumor suppressor 1	3	0	0	5106	-0.18	0.2221	1.031	3.12e-11	0.659733	8.04e-09	1	-0.0107685	0.870541	0.999548	0.0126192	0.80073	0.96831	-0.544085	9.08e-14	3.14e-11
1167	Vim	22352	vimentin	3	0	0	4041	0.23	0.1412	0.9999	3.65e-11	0.0786018	9.17e-09	1	-0.177328	0.0250193	0.803304	0.0773006	0.428362	0.87125	0.788898	6.98e-12	1.9e-09
1168	Pi4ka	224020	phosphatidylinositol 4-kinase alpha	3	0	0	3912	-0.17	0.1323	1	1.39e-10	0.645743	3.25e-08	1	0.0160259	0.864344	0.999548	-0.186804	0.000198438	0.0109011	-0.333874	1.82e-09	3.28e-07
1169	Grp	225642	gastrin releasing peptide	3	0	0	2410	-0.41	0.0475	0.7375	2.08e-10	0.217924	4.69e-08	1	0.103977	0.601776	0.999548	-0.42122	0.000659751	1	-0.912761	1.21e-09	2.24e-07
1170	Spsb1	74646	splA/ryanodine receptor domain and SOCS box containing 1	3	0	0	2318	0.36	0.04359	0.7184	2.72e-10	0.747741	5.88e-08	1	0.0177735	0.907647	0.999548	0.195731	0.124612	1	0.862193	5.68e-12	1.61e-09
1171	Btg2	12227	B cell translocation gene 2, anti-proliferative	3	0	0	2878	0.26	0.06986	0.8337	4.01e-10	0.750927	8.39e-08	1	0.00988652	0.908935	0.999548	0.274386	0.00019196	0.0106447	0.502247	5.59e-09	9.16e-07
1172	Snap91	20616	synaptosomal-associated protein 91	3	0	0	4482	-0.13	0.1732	1.022	5.39e-10	0.222788	1.12e-07	1	0.0296605	0.60622	0.999548	-0.131081	1.61e-06	0.000220966	-0.281377	1.37e-06	0.000105746
1173	Rhbdl3	246104	rhomboid like 3	3	0	0	3781	-0.19	0.1235	0.9882	7.65e-10	0.222741	1.55e-07	1	0.0757323	0.606178	0.999548	-0.20484	0.0402655	0.391856	-0.441427	8.01e-11	1.83e-08
1174	Cd44	12505	CD44 antigen	3	33.3333	0	2308	0.52	0.04316	0.7166	8.63e-10	0.570713	1.7e-07	1	-0.0658333	0.82948	1	0.192765	0.426527	1	1.42864	6.29e-12	1.75e-09
1175	Mical2	320878	microtubule associated monooxygenase, calponin and LIM domain containing 2	3	0	0	2848	-0.23	0.0683	0.8288	9.8e-10	0.514626	1.91e-07	1	-0.0333164	0.801365	0.999548	-0.189417	0.0094162	0.175709	-0.476121	3.38e-10	7.21e-08
1176	Jun	16476	jun proto-oncogene	3	0	0	2641	0.28	0.05804	0.8082	1.13e-09	0.323939	2.18e-07	1	0.360516	8.8e-05	0.0324549	0.0355622	0.686786	0.945397	0.448148	4.91e-08	5.98e-06
1177	Mink1	50932	misshapen-like kinase 1 (zebrafish)	3	0	0	3144	-0.18	0.08432	0.8932	1.39e-09	0.426295	2.64e-07	1	-0.0401353	0.75261	0.999548	-0.107822	0.0923405	0.553941	-0.388915	5.37e-11	1.27e-08
1178	Hmgcs1	208715	3-hydroxy-3-methylglutaryl-Coenzyme A synthase 1	3	0	0	4191	-0.18	0.1518	1.013	1.45e-09	0.0991688	2.69e-07	1	0.0274509	0.462869	0.999548	-0.105442	0.000315751	0.015213	-0.449709	2.66e-08	3.56e-06
1179	Cxcl12	20315	chemokine (C-X-C motif) ligand 12	3	33.3333	0	2379	0.49	0.04616	0.739	1.64e-09	0.621234	2.99e-07	1	-0.0353791	0.853267	0.999548	0.421798	0.0725859	1	1.08364	7.17e-11	1.67e-08
1180	Htra1	56213	HtrA serine peptidase 1	3	0	0	3901	-0.19	0.1315	0.9995	8.52e-09	0.715753	1.4e-06	1	0.0204255	0.894515	0.999548	-0.149144	0.0673077	0.492083	-0.429588	4.4e-10	9.06e-08
1181	Sgk1	20393	serum/glucocorticoid regulated kinase 1	3	0	0	3336	0.28	0.09542	0.9188	8.98e-09	0.89102	1.46e-06	1	-0.00408228	0.962267	0.999548	0.354388	6.53e-06	0.00066217	0.484179	4.46e-06	0.000277163
1182	Fn1	14268	fibronectin 1	3	33.3333	0	2646	0.43	0.05827	0.8069	9.06e-09	0.244694	1.46e-06	1	-0.131703	0.625472	0.999548	0.344946	0.0590598	1	1.06836	7.66e-10	1.49e-07
1183	Osbp2	74309	oxysterol binding protein 2	3	0	0	2219	0.31	0.03956	0.6997	9.76e-09	0.0636302	1.56e-06	1	0.117325	0.399228	0.999548	0.276414	0.00381378	0.0970451	0.551337	2.01e-08	2.86e-06
1184	Sez6	20370	seizure related gene 6	3	0	0	3923	-0.13	0.1331	0.9994	1.3e-08	0.2964	2.06e-06	1	-0.0330062	0.666744	0.999548	-0.0770747	0.0324968	0.353734	-0.275183	1.93e-09	3.43e-07
1185	S100a10	20194	S100 calcium binding protein A10 (calpactin)	3	0	0	2761	0.25	0.06391	0.8211	1.41e-08	0.468012	2.22e-06	1	0.0229927	0.7764	0.999548	0.140457	0.025589	0.314669	0.599544	2.3e-09	4.04e-07
1186	Dnm1	13429	dynamin 1	3	0	0	4034	-0.17	0.1407	1	1.83e-08	0.30698	2.84e-06	1	0.03442	0.674585	0.999548	-0.151383	0.00117374	0.0400764	-0.38751	7.69e-08	8.63e-06
1187	Gal3st3	545276	galactose-3-O-sulfotransferase 3	3	0	0	3912	-0.18	0.1323	1.001	2.96e-08	0.511458	4.38e-06	1	0.0196763	0.799718	0.999548	-0.14747	0.0194804	0.272324	-0.426839	6.6e-09	1.05e-06
1188	Itm2b	16432	integral membrane protein 2B	3	0	0	7120	0.05	0.398	1.106	3.07e-08	0.847015	4.5e-06	1	0.00290874	0.946158	0.999548	-0.0559496	0.0423728	0.400429	0.189531	2.66e-09	4.58e-07
1189	Fam107a	268709	family with sequence similarity 107, member A	3	0	0	1533	-0.43	0.01703	0.531	6.15e-08	0.431165	8.35e-06	1	-0.125558	0.755465	1	-0.215232	0.249288	1	-0.962573	1.21e-09	2.24e-07
1190	Anxa2	12306	annexin A2	3	33.3333	0	783.7	1.07	0.003391	0.2664	1.04e-07	0.97326	1.35e-05	1	-0.00658564	0.991006	1	1.18922	0.118705	1	2.04179	3.46e-09	5.82e-07
1191	Cryab	12955	crystallin, alpha B	3	0	0	4613	0.1	0.1831	1.039	1.04e-07	0.485525	1.35e-05	1	0.0504992	0.785966	0.999548	-0.360465	0.0284167	1	0.600339	1.81e-08	2.6e-06
1192	Vgll4	232334	vestigial like family member 4	3	0	0	4070	0.18	0.1432	1.004	1.28e-07	0.364921	1.64e-05	1	-0.0223224	0.714605	0.999548	0.234647	2.49e-05	0.00192647	0.323208	2.86e-05	0.00127346
1193	Elmo2	140579	engulfment and cell motility 2	3	0	0	4367	-0.13	0.1647	1.02	2.02e-07	0.764161	2.54e-05	1	0.00580459	0.914243	0.999548	-0.178473	0.000392092	0.0176027	-0.212647	2.35e-06	0.000160603
1194	Kcnh3	16512	potassium voltage-gated channel, subfamily H (eag-related), member 3	3	0	0	4227	-0.17	0.1544	1.016	2.16e-07	0.697191	2.7e-05	1	0.0123503	0.886715	0.999548	-0.102177	0.0441639	0.407395	-0.414188	2.32e-08	3.18e-06
1195	Slc25a34	384071	solute carrier family 25, member 34	3	0	0	1330	-0.44	0.01219	0.4688	2.23e-07	0.127841	2.77e-05	1	-0.406231	0.50376	1	-0.246299	0.191388	1	-0.661678	9.71e-09	1.44e-06
1196	Adm	11535	adrenomedullin	3	33.3333	0	1594	0.71	0.01864	0.5286	2.56e-07	0.73294	3.09e-05	1	0.4345	0.450477	1	-0.0684144	0.901618	1	1.76965	2.69e-09	4.58e-07
1197	Pgam1	18648	phosphoglycerate mutase 1	3	0	0	4775	-0.08	0.1957	1.027	3.01e-07	0.1219	3.56e-05	1	-0.0219646	0.495832	0.999548	-0.0625786	0.0346392	0.364891	-0.163858	7.59e-08	8.58e-06
1198	Ramp1	51801	receptor (calcitonin) activity modifying protein 1	3	0	33.3333	1217	-0.6	0.009891	0.4381	3.69e-07	0.739132	4.24e-05	1	-0.0660171	0.904151	1	-0.387659	0.290932	1	-1.33839	6.21e-09	1e-06
1199	Col5a3	53867	collagen, type V, alpha 3	3	0	0	6660	0.12	0.3564	1.078	3.85e-07	0.13748	4.37e-05	1	-0.111944	0.516116	0.999548	-0.123171	0.321427	0.823604	0.598822	1.03e-08	1.5e-06
1200	Cyb5r3	109754	cytochrome b5 reductase 3	3	0	0	3779	-0.12	0.1234	0.9878	5.15e-07	0.161613	5.78e-05	1	-0.0277088	0.544702	0.999548	-0.165056	1.14e-05	0.000984816	-0.179475	0.000380235	0.0102096
1201	Rapgef4	56508	Rap guanine nucleotide exchange factor (GEF) 4	3	0	0	2775	-0.2	0.06459	0.8153	5.87e-07	0.0868643	6.49e-05	1	-0.0742938	0.442874	0.999548	-0.133799	0.133192	0.642909	-0.380729	4.63e-08	5.8e-06
1202	Gadd45b	17873	growth arrest and DNA-damage-inducible 45 beta	3	33.3333	0	5122	0.09	0.2234	1.043	6.8e-07	0.195241	7.43e-05	1	-0.727786	0.107287	1	-0.177095	0.580128	1	1.18675	5.16e-08	6.22e-06
1203	Cav2	12390	caveolin 2	3	0	0	6282	0.13	0.3226	1.065	7.09e-07	0.140719	7.62e-05	1	-0.195835	0.520137	1	-0.247722	0.239066	1	0.840932	2.7e-08	3.56e-06
1204	Tuba4a	22145	tubulin, alpha 4A	3	0	0	3559	-0.15	0.1091	0.9724	7.95e-07	0.315744	8.41e-05	1	-0.0196347	0.680944	0.999548	-0.142094	0.000747285	0.0293324	-0.274367	7.5e-06	0.000420568
1205	Sorbs1	20411	sorbin and SH3 domain containing 1	3	0	0	5690	0.16	0.2709	1.057	8.29e-07	0.812125	8.68e-05	1	-0.0548733	0.555255	0.999548	0.00692774	0.932984	0.99076	0.526429	7.72e-09	1.2e-06
1206	Itpka	228550	inositol 1,4,5-trisphosphate 3-kinase A	3	0	0	3764	-0.2	0.1224	0.9887	1.01e-06	0.75835	0.000104502	1	-0.142296	0.228855	0.999548	0.0075173	0.91192	0.987084	-0.450577	2.39e-08	3.26e-06
1207	Ecel1	13599	endothelin converting enzyme-like 1	3	0	0	1614	0.47	0.01918	0.5326	1.03e-06	0.200392	0.000105024	1	0.450376	0.000454785	0.0972343	0.108392	0.585185	1	0.853087	1.91e-05	0.000914183
1208	Abhd4	105501	abhydrolase domain containing 4	3	0	0	3842	-0.1	0.1275	0.9894	1.11e-06	0.216123	0.000112188	1	-0.141766	0.00560568	0.45271	-0.126249	1.64e-06	0.000220966	-0.0301062	0.600114	0.898408
1209	Ndrg4	234593	N-myc downstream regulated gene 4	3	0	0	5178	-0.1	0.228	1.032	1.25e-06	0.13754	0.000125565	1	0.0249217	0.516191	0.999548	-0.0722459	0.0198437	0.274915	-0.250649	6.18e-07	5.2e-05
1210	Plxnc1	54712	plexin C1	3	0	0	3401	-0.16	0.09934	0.9467	1.57e-06	0.384489	0.000156119	1	-0.0400579	0.727156	0.999548	-0.326565	8.22e-08	1.46e-05	-0.109829	0.135931	0.509385
1211	Sdc3	20970	syndecan 3	3	0	0	4804	-0.11	0.198	1.027	1.69e-06	0.516948	0.000166129	1	0.021985	0.802569	0.999548	-0.116423	0.000411493	0.017785	-0.231173	2.66e-05	0.00120742
1212	Tagln	21345	transgelin	3	33.3333	0	2511	0.46	0.05199	0.7692	1.83e-06	0.255404	0.000179547	1	-0.140255	0.634467	1	0.461923	0.0566227	1	1.05593	2.68e-07	2.64e-05
1213	Luzp2	233271	leucine zipper protein 2	3	0	0	2804	-0.21	0.06608	0.8222	1.86e-06	0.176255	0.000181818	1	-0.0483686	0.560678	0.999548	-0.14664	0.0795811	0.525171	-0.434536	2.2e-07	2.24e-05
1214	Msmo1	66234	methylsterol monoxygenase 1	3	0	0	3718	-0.17	0.1193	0.9849	2.22e-06	0.796342	0.00021337	1	-0.00399783	0.926901	0.999548	-0.0882674	0.0290588	0.336447	-0.404608	4.44e-07	3.94e-05
1215	Slc14a1	108052	solute carrier family 14 (urea transporter), member 1	3	0	0	1544	0.45	0.01731	0.5097	2.53e-06	0.139944	0.000239066	1	0.173364	0.519181	1	0.32809	0.140254	1	0.861143	1.9e-07	1.98e-05
1216	Ap1b1	11764	adaptor protein complex AP-1, beta 1 subunit	3	0	0	4366	-0.1	0.1645	1.02	2.57e-06	0.902399	0.000241503	1	-0.00238327	0.966347	0.999548	-0.107712	0.00148785	0.0483181	-0.184818	9.8e-06	0.000524143
1217	Gclc	14629	glutamate-cysteine ligase, catalytic subunit	3	0	0	4015	-0.14	0.1394	1.002	2.84e-06	0.111038	0.000263996	1	-0.185162	0.0272153	0.834101	-0.271596	1.2e-06	0.000176606	0.0502986	0.480644	0.839879
1218	Hmgn1	15312	high mobility group nucleosomal binding domain 1	3	0	0	1147	0.8	0.008579	0.3833	3.53e-06	0.177671	0.000324255	1	2.08884	0.0492938	1	0.0274228	0.562176	0.918306	0.281482	7.25e-07	5.94e-05
1219	Wwtr1	97064	WW domain containing transcription regulator 1	3	0	0	6202	0.17	0.3156	1.062	3.76e-06	0.46518	0.00034326	1	-0.0505762	0.774831	0.999548	-0.0978452	0.518922	1	0.65442	5.35e-08	6.39e-06
1220	Ap2a1	11771	adaptor-related protein complex 2, alpha 1 subunit	3	0	0	3819	-0.13	0.126	0.9885	3.97e-06	0.338194	0.000361533	1	-0.0172265	0.696715	0.999548	-0.132438	0.000736228	0.0292899	-0.227316	4.47e-05	0.00183109
1221	Fam163b	109349	family with sequence similarity 163, member B	3	0	0	3499	0.16	0.1054	0.941	4.92e-06	0.382992	0.000439991	1	0.0356065	0.726212	0.999548	0.144231	0.00504313	0.116707	0.313835	7.96e-06	0.000442377
1222	Flna	192176	filamin, alpha	3	0	0	6419	0.12	0.3348	1.07	5.08e-06	0.226182	0.000449351	1	-0.211944	0.0826431	0.999548	-0.0529523	0.609283	0.928296	0.639468	6e-07	5.12e-05
1223	Syt17	110058	synaptotagmin XVII	3	0	0	7272	-0.09	0.4118	1.114	5.17e-06	0.188684	0.000453555	1	0.0908332	0.573559	0.999548	0.0569364	0.561048	1	-0.403596	9.58e-08	1.05e-05
1224	Sik1	17691	salt inducible kinase 1	3	0	0	2351	0.31	0.04496	0.729	5.47e-06	0.546872	0.000476471	1	0.0228066	0.817765	0.999548	0.262824	0.00595835	1	0.644438	6.74e-06	0.000386258
1225	Wdr7	104082	WD repeat domain 7	3	0	0	4546	-0.12	0.178	1.023	5.61e-06	0.413291	0.000483783	1	0.0248618	0.744878	0.999548	-0.142769	0.00631709	0.136514	-0.240169	7.17e-06	0.000407177
1226	Cxcl14	57266	chemokine (C-X-C motif) ligand 14	3	0	0	2756	-0.2	0.06365	0.8111	5.68e-06	0.169151	0.000487983	1	-0.0659673	0.553042	0.999548	-0.152914	0.143172	0.657987	-0.374907	4.32e-07	3.89e-05
1227	Ttyh3	78339	tweety family member 3	3	0	0	3955	-0.13	0.1352	1	5.87e-06	0.289728	0.00050008	1	-0.0258678	0.661704	0.999548	-0.0768331	0.0210697	0.278495	-0.28557	2.55e-06	0.00017075
1228	Ano6	105722	anoctamin 6	3	0	0	5948	0.19	0.2933	1.056	6.06e-06	0.719333	0.000514548	1	-0.0887961	0.574711	0.999548	-0.0155526	0.896004	1	0.658505	7.16e-08	8.17e-06
1229	Atp6v0d1	11972	ATPase, H+ transporting, lysosomal V0 subunit D1	3	0	0	6235	-0.06	0.3185	1.052	6.71e-06	0.0887298	0.000564793	1	0.0292325	0.446022	0.999548	-0.0422886	0.118412	0.61759	-0.166485	7.82e-07	6.29e-05
1230	Ppm1l	242083	protein phosphatase 1 (formerly 2C)-like	3	0	0	3337	0.17	0.09549	0.9186	7.71e-06	0.0804637	0.000640549	1	0.150342	0.0191417	0.718728	0.0456998	0.431718	0.872757	0.326762	5.84e-06	0.000343952
1231	Chn1	108699	chimerin 1	3	0	0	4945	-0.13	0.2091	1.032	8.68e-06	0.0817588	0.00071544	1	0.0747121	0.434022	0.999548	-0.0625807	0.432207	0.872757	-0.393448	2.94e-07	2.85e-05
1232	Tspoap1	207777	TSPO associated protein 1	3	0	0	3114	-0.24	0.08258	0.887	8.8e-06	0.545073	0.000721188	1	0.0437593	0.816868	0.999548	-0.175836	0.104162	1	-0.592435	6.58e-07	5.43e-05
1233	Acsl6	216739	acyl-CoA synthetase long-chain family member 6	3	0	0	4207	-0.14	0.153	1.013	9.07e-06	0.963624	0.000732035	1	0.000949746	0.987725	0.999548	-0.161254	0.00186834	0.056902	-0.261735	3.14e-05	0.00136447
1234	Brinp2	240843	bone morphogenic protein/retinoic acid inducible neural-specific 2	3	0	0	4858	-0.1	0.2022	1.029	9.26e-06	0.708611	0.00074252	1	-0.0155657	0.831529	0.999548	-0.00648369	0.89153	0.983199	-0.270279	8e-08	8.89e-06
1235	Faah	14073	fatty acid amide hydrolase	3	0	0	2334	-0.28	0.04428	0.7185	9.4e-06	0.410879	0.000746722	1	-0.0617137	0.743427	0.999548	-0.227579	0.00291457	0.0811738	-0.550001	2.78e-05	0.0012438
1236	Rps2	16898	ribosomal protein S2	3	0	0	4075	-0.1	0.1436	1.004	9.61e-06	0.223515	0.00076079	1	-0.0370629	0.606879	0.999548	-0.104479	0.000843143	0.0307281	-0.149218	0.000120902	0.00408797
1237	Fibcd1	98970	fibrinogen C domain containing 1	3	0	0	1396	-0.42	0.01367	0.4848	1.01e-05	0.129301	0.000794915	1	-0.194971	0.505671	1	-0.394132	0.0538328	1	-0.65618	2.4e-06	0.000163076
1238	Slc30a3	22784	solute carrier family 30 (zinc transporter), member 3	3	0	0	2982	-0.21	0.07533	0.8533	1.01e-05	0.53298	0.000794915	1	-0.0288233	0.810781	0.999548	-0.172192	0.017769	0.257892	-0.437217	4.55e-06	0.000278979
1239	Prrt3	210673	proline-rich transmembrane protein 3	3	0	0	6774	-0.12	0.3667	1.084	1.06e-05	0.42403	0.000819422	1	0.0421122	0.705815	0.999548	0.0276443	0.751275	0.958646	-0.425566	1.3e-07	1.38e-05
1240	Ubr7	66622	ubiquitin protein ligase E3 component n-recognin 7 (putative)	3	0	0	4257	-0.13	0.1566	1.017	1.07e-05	0.321512	0.000827665	1	-0.123854	0.0616426	0.999548	-0.286008	1.65e-06	0.000220966	0.0289121	0.685066	0.927369
1241	H3f3b	15081	H3 histone, family 3B	3	0	0	4755	0.08	0.1941	1.044	1.09e-05	0.576995	0.000842508	1	0.00680154	0.832512	0.999548	0.10161	0.000263951	0.0134913	0.143923	0.000325719	0.00910944
1242	Best1	24115	bestrophin 1	3	0	0	3088	-0.2	0.08116	0.8802	1.11e-05	0.668937	0.000849014	1	-0.0133016	0.874571	0.999548	-0.193308	0.00588342	0.129341	-0.400833	1.41e-05	0.000714924
1243	Aqp4	11829	aquaporin 4	3	0	0	3153	-0.16	0.08483	0.8953	1.15e-05	0.636724	0.00087716	1	-0.196097	0.00381492	0.387232	-0.259696	2.31e-05	0.00181201	-0.0141314	0.860301	0.973657
1244	Rab20	19332	RAB20, member RAS oncogene family	3	33.3333	0	624.2	0.97	0.001908	0.2256	1.18e-05	0.305463	0.000890349	1	0.245178	0.673472	1	0.531693	0.424157	1	2.14701	2.72e-07	2.65e-05
1245	Sertad1	55942	SERTA domain containing 1	3	0	0	6228	0.12	0.3179	1.063	1.18e-05	0.707735	0.000890349	1	-0.0409573	0.891163	0.999548	-0.306534	0.166845	1	0.704018	5.25e-07	4.56e-05
1246	Scrib	105782	scribbled planar cell polarity	3	0	0	3202	-0.18	0.08762	0.9068	1.29e-05	0.524662	0.000963763	1	-0.0272996	0.806541	0.999548	-0.151969	0.0484747	0.431066	-0.369413	2.21e-06	0.000153604
1247	Fkbp11	66120	FK506 binding protein 11	3	0	0	5431	-0.1	0.2489	1.042	1.64e-05	0.816845	0.00119164	1	0.00234318	0.934788	0.999548	-0.0331345	0.0899801	0.550334	-0.272929	1.34e-06	0.00010392
1248	Il6ra	16194	interleukin 6 receptor, alpha	3	0	0	4303	0.13	0.1599	1.02	1.66e-05	0.749534	0.00120288	1	0.0495195	0.908372	1	-0.429384	0.207039	1	0.77393	6.09e-07	5.15e-05
1249	Cavin1	19285	caveolae associated 1	3	0	0	6220	0.08	0.3172	1.063	1.67e-05	0.666355	0.00120802	1	-0.0498789	0.873444	1	-0.451317	0.0517987	1	0.751836	2.56e-06	0.00017075
1250	Cbx6	494448	chromobox 6	3	0	0	3940	-0.11	0.1342	0.9996	1.7e-05	0.110075	0.00122209	1	-0.0382246	0.479251	0.999548	-0.0602863	0.140265	0.652838	-0.244585	1.76e-06	0.000128967
1251	Sema4a	20351	sema domain, immunoglobulin domain (Ig), transmembrane domain (TM) and short cytoplasmic domain, (semaphorin) 4A	3	0	0	5073	-0.15	0.2194	1.03	1.9e-05	0.482882	0.00134684	1	0.142831	0.331763	0.999548	-0.0292929	0.784537	0.964652	-0.560562	5.12e-07	4.49e-05
1252	Lrrtm1	74342	leucine rich repeat transmembrane neuronal 1	3	0	0	5518	-0.12	0.2563	1.042	2.01e-05	0.301066	0.00141998	1	-0.0276602	0.603503	0.999548	0.0186713	0.670225	0.941911	-0.33617	3.53e-07	3.29e-05
1253	Chst1	76969	carbohydrate (keratan sulfate Gal-6) sulfotransferase 1	3	0	0	3920	-0.12	0.1328	0.9998	2.17e-05	0.21446	0.00151557	1	-0.0334908	0.598571	0.999548	-0.10021	0.0249697	0.309103	-0.225574	1.04e-05	0.00055267
1254	Vash1	238328	vasohibin 1	3	0	0	2913	0.2	0.07169	0.8391	2.31e-05	0.0780318	0.0015967	1	0.0775003	0.427324	0.999548	0.279272	1.06e-05	0.000953997	0.23864	0.0367834	0.249838
1255	Fbxl16	214931	F-box and leucine-rich repeat protein 16	3	0	0	4804	-0.13	0.198	1.027	2.44e-05	0.8192	0.00166086	1	-0.0507547	0.56249	0.999548	0.00605092	0.935685	0.990779	-0.355313	3.37e-07	3.19e-05
1256	Afmid	71562	arylformamidase	3	0	33.3333	2268	-0.44	0.04154	0.7043	2.47e-05	0.239822	0.00167814	1	0.201321	0.621293	1	-0.4741	0.130538	1	-1.06002	2.22e-06	0.000153604
1257	Grem2	23893	gremlin 2, DAN family BMP antagonist	3	0	0	2695	0.26	0.06062	0.8153	2.48e-05	0.253563	0.00167814	1	0.277683	0.00653366	0.483917	0.0435801	0.632939	1	0.467859	4.37e-05	0.00180325
1258	Hspa12a	73442	heat shock protein 12A	3	0	0	4237	-0.11	0.1551	1.018	2.5e-05	0.702715	0.00168447	1	-0.011785	0.88905	0.999548	-0.0947073	0.0278249	0.333709	-0.212158	7.37e-06	0.000416859
1259	Nid1	18073	nidogen 1	3	0	0	3653	0.23	0.1151	0.9686	2.61e-05	0.582503	0.00175689	1	-0.0201944	0.835153	0.999548	0.317187	0.000112729	0.00697493	0.390558	0.00203958	0.0362054
1260	Rcan1	54720	regulator of calcineurin 1	3	0	0	4352	0.13	0.1635	1.02	2.95e-05	0.102306	0.00197217	1	0.0378565	0.435764	0.999548	0.0372617	0.4677	0.882251	0.299938	1.08e-06	8.6e-05
1261	Ltbp3	16998	latent transforming growth factor beta binding protein 3	3	0	0	4815	0.14	0.1988	1.046	2.99e-05	0.39463	0.0019939	1	-0.0591291	0.733494	0.999548	0.141882	0.0962553	0.562242	0.331603	3.18e-06	0.000205078
1262	Sptlc1	268656	serine palmitoyltransferase, long chain base subunit 1	3	0	0	4236	0.16	0.155	1.017	3.11e-05	0.183032	0.00205439	1	0.23644	0.0250803	0.803304	-0.0500734	0.567774	0.921164	0.306842	1.64e-05	0.000813456
1263	Ier5l	72500	immediate early response 5-like	3	0	0	6484	0.13	0.3406	1.071	3.16e-05	0.0801654	0.00208265	1	-0.158344	0.277794	0.999548	-0.131325	0.431184	1	0.689998	1.99e-06	0.000139
1264	Id1	15901	inhibitor of DNA binding 1	3	33.3333	0	1645	0.51	0.02005	0.5427	3.19e-05	0.24008	0.00209399	1	0.308403	0.0482562	0.979338	0.0790094	0.621515	1	1.13151	8.03e-06	0.000444161
1265	Sirpa	19261	signal-regulatory protein alpha	3	0	0	4715	-0.11	0.191	1.026	3.54e-05	0.334761	0.00231366	1	0.0314574	0.694349	0.999548	-0.149016	0.00082147	0.0305608	-0.20892	0.000476495	0.0120835
1266	Tst	22117	thiosulfate sulfurtransferase, mitochondrial	3	0	0	3982	-0.16	0.1371	1.003	3.78e-05	0.971329	0.00244286	1	0.00111431	0.99035	0.999548	-0.213758	5.19e-05	0.00363243	-0.258293	0.00568767	0.0757231
1267	Sparc	20692	secreted acidic cysteine rich glycoprotein	3	0	0	8659	0.03	0.5368	1.09	3.88e-05	0.0573802	0.00249471	1	-0.167174	0.0465875	0.967062	-0.0495995	0.385704	0.855664	0.292911	1.68e-05	0.000822179
1268	Mgat4b	103534	mannoside acetylglucosaminyltransferase 4, isoenzyme B	3	0	0	4095	-0.11	0.145	1.005	4.09e-05	0.395014	0.00261858	1	-0.0171372	0.733732	0.999548	-0.0933893	0.0262028	0.320875	-0.231366	1.66e-05	0.000819539
1269	Vat1	26949	vesicle amine transport 1	3	0	0	4583	0.17	0.1809	1.038	4.32e-05	0.491769	0.00275974	1	-0.0163298	0.789321	0.999548	0.0936619	0.234031	0.765182	0.438238	1.85e-06	0.000132592
1270	Inka2	109050	inka box actin regulator 2	3	0	0	2512	-0.23	0.05203	0.7659	4.7e-05	0.19741	0.00296493	1	-0.0849793	0.582268	0.999548	-0.1607	0.141936	1	-0.434869	4.54e-06	0.000278979
1271	Susd4	96935	sushi domain containing 4	3	0	0	5992	-0.07	0.2971	1.04	4.82e-05	0.206411	0.00302688	1	0.0273337	0.590986	0.999548	-0.039041	0.375232	0.851918	-0.197573	1.74e-06	0.000128588
1272	Cd24a	12484	CD24a antigen	3	0	0	6126	0.09	0.3089	1.061	5.13e-05	0.539325	0.00320077	1	-0.00950492	0.813986	0.999548	0.0159556	0.656072	0.938396	0.257826	7.76e-07	6.28e-05
1273	Cox6a2	12862	cytochrome c oxidase subunit 6A2	3	33.3333	0	2105	0.55	0.03517	0.6812	5.2e-05	0.34182	0.00323722	1	0.290115	0.333345	1	-0.156882	0.699197	1	1.50951	1.81e-06	0.000132021
1274	Nwd1	319555	NACHT and WD repeat domain containing 1	3	0	0	1871	-0.32	0.02694	0.6169	5.53e-05	0.0873816	0.00339834	1	-0.19215	0.443752	0.999548	-0.21738	0.119754	1	-0.556078	8.5e-06	0.000462352
1275	Ppp2r2c	269643	protein phosphatase 2, regulatory subunit B, gamma	3	0	0	3915	-0.14	0.1325	1	5.78e-05	0.877153	0.00352431	1	-0.00362004	0.957249	0.999548	-0.0855885	0.167268	0.690297	-0.33305	2.97e-06	0.000193843
1276	Megf11	214058	multiple EGF-like-domains 11	3	0	0	3867	0.16	0.1292	0.99	6.08e-05	0.995576	0.00369486	1	0.0982732	0.321307	0.999548	0.000136441	0.998523	0.999566	0.391913	1.57e-06	0.000117468
1277	Ddr2	18214	discoidin domain receptor family, member 2	3	0	0	1347	-0.53	0.01258	0.4753	6.22e-05	0.570809	0.003766	1	-0.918841	0.000218581	0.0575804	-0.602826	0.00285229	1	-0.0617631	0.829527	0.967264
1278	Tnfrsf12a	27279	tumor necrosis factor receptor superfamily, member 12a	3	0	0	2987	0.34	0.0756	0.8487	6.53e-05	0.323587	0.00394571	1	-0.101012	0.686537	0.999548	0.271783	0.161921	1	0.838801	4.93e-06	0.000298328
1279	Adamts1	11504	a disintegrin-like and metallopeptidase (reprolysin type) with thrombospondin type 1 motif, 1	3	33.3333	0	529.4	1.13	0.001239	0.1962	6.63e-05	0.556145	0.00399417	1	1.75736	0.00590953	1	0.136341	0.822361	1	1.48834	0.000114643	0.00392828
1280	Cyld	74256	CYLD lysine 63 deubiquitinase	3	0	0	2905	-0.23	0.07129	0.8373	6.93e-05	0.523113	0.00416157	1	-0.0306519	0.805747	0.999548	-0.168155	0.108848	1	-0.503151	6.68e-06	0.000384706
1281	Kcnj10	16513	potassium inwardly-rectifying channel, subfamily J, member 10	3	0	0	1921	-0.3	0.02862	0.6248	7.18e-05	0.105231	0.00427112	1	-0.156122	0.472116	0.999548	-0.286996	0.0443784	1	-0.471816	2.91e-05	0.0012926
1282	Gpat3	231510	glycerol-3-phosphate acyltransferase 3	3	0	0	2221	0.39	0.03965	0.6999	7.59e-05	0.923043	0.0044899	1	0.246345	0.527075	1	0.009306	0.97366	1	0.913414	1.27e-06	0.000100004
1283	Dynlt1a	100310872	dynein light chain Tctex-type 1A	3	0	0	4995	0.15	0.2132	1.045	7.9e-05	0.421824	0.00465799	1	-0.0164488	0.74997	0.999548	0.0654314	0.136218	0.64633	0.391269	6.67e-06	0.000384706
1284	Srebf2	20788	sterol regulatory element binding factor 2	3	0	0	5252	-0.11	0.2341	1.032	8.51e-05	0.780752	0.00497655	1	0.00462204	0.920812	0.999548	-0.046017	0.304795	0.816956	-0.276782	2.64e-06	0.000173336
1285	Hs3st2	195646	heparan sulfate (glucosamine) 3-O-sulfotransferase 2	3	0	0	3171	0.19	0.08583	0.8796	8.68e-05	0.246394	0.00504492	1	0.0471807	0.626917	0.999548	0.174064	0.0136875	0.220834	0.345691	8.85e-05	0.00314508
1286	Otub1	107260	OTU domain, ubiquitin aldehyde binding 1	3	0	0	4188	-0.11	0.1516	1.014	9.21e-05	0.253599	0.00532031	1	-0.0209573	0.632969	0.999548	-0.0970428	0.0037434	0.0960861	-0.200203	0.000342845	0.00942344
1287	Dync1li2	234663	dynein, cytoplasmic 1 light intermediate chain 2	3	0	0	5524	0.09	0.2568	1.056	9.88e-05	0.27264	0.00569158	1	0.0988807	0.0743635	0.999548	-0.0192376	0.64843	0.934976	0.188065	1.83e-05	0.000884584
1288	Tpi1	21991	triosephosphate isomerase 1	3	0	0	3903	-0.1	0.1317	0.9993	0.000101541	0.133249	0.0058135	1	-0.0907585	0.510765	0.999548	-0.0793976	0.00234751	0.0676404	-0.12881	0.000758421	0.0172174
1289	Pik3r2	18709	phosphoinositide-3-kinase regulatory subunit 2	3	0	0	4745	-0.09	0.1933	1.026	0.000101773	0.683132	0.0058135	1	-0.00684055	0.880714	0.999548	-0.0631426	0.0789399	0.522532	-0.190407	1.31e-05	0.000675062
1290	Dennd2a	209773	DENN/MADD domain containing 2A	3	0	0	2518	0.25	0.05229	0.7702	0.000122336	0.0841802	0.00681516	1	0.102835	0.438265	0.999548	0.290629	0.00713113	1	0.344514	0.00036085	0.00981282
1291	Tubb4b	227613	tubulin, beta 4B class IVB	3	0	0	3835	-0.11	0.1271	0.9888	0.000122088	0.0775668	0.00681516	1	-0.0386651	0.426473	0.999548	-0.0958626	0.00389045	0.0977268	-0.198465	0.000678128	0.0159323
1292	Shroom2	110380	shroom family member 2	3	0	0	5122	-0.11	0.2235	1.03	0.000126002	0.954042	0.00696024	1	0.00160388	0.98444	0.999548	-0.0593178	0.170636	0.693697	-0.265842	6.95e-06	0.000396384
1293	Phf13	230936	PHD finger protein 13	3	0	0	5830	0.19	0.283	1.056	0.000126638	0.414714	0.0069762	1	-0.031017	0.745732	0.999548	-0.0844859	0.613632	1	0.677379	2.57e-06	0.00017075
1294	Tmem109	68539	transmembrane protein 109	3	0	0	3669	0.16	0.1162	0.9711	0.000127106	0.13781	0.00697802	1	0.0709747	0.363813	0.999548	0.0584677	0.516528	0.902892	0.360741	6.27e-06	0.000366092
1295	Gdi2	14569	guanosine diphosphate (GDP) dissociation inhibitor 2	3	0	0	5915	0.07	0.2903	1.058	0.000127365	0.0591197	0.00697802	1	-0.0335504	0.389563	0.999548	0.0834642	0.0077845	0.151514	0.168644	0.000389636	0.0104401
1296	Tmeff1	230157	transmembrane protein with EGF-like and two follistatin-like domains 1	3	0	0	4476	0.11	0.1727	1.031	0.000129352	0.18147	0.00706759	1	0.0625679	0.0535552	0.999548	0.0213806	0.566154	0.920054	0.241712	3.97e-05	0.00165172
1297	Msn	17698	moesin	3	0	0	7001	0.15	0.3872	1.1	0.00013035	0.660738	0.00710286	1	-0.111009	0.398244	0.999548	-0.0179468	0.870983	0.979464	0.591372	3.5e-06	0.000222495
1298	Zfp553	233887	zinc finger protein 553	3	0	0	4143	0.16	0.1484	1.008	0.000136492	0.845415	0.00739745	1	0.0577833	0.53044	0.999548	0.00644475	0.945562	1	0.404515	2.55e-06	0.00017075
1299	Cdr2	12585	cerebellar degeneration-related 2	3	0	0	4534	0.19	0.1771	1.037	0.000148359	0.747587	0.00794898	1	-0.318503	0.117657	0.999548	0.0231042	0.907585	1	0.852646	1.32e-05	0.000675062
1300	Cdh4	12561	cadherin 4	3	0	0	3041	-0.2	0.07858	0.8686	0.000152162	0.498948	0.00810597	1	-0.0325902	0.793144	0.999548	-0.171713	0.0710158	0.504753	-0.38678	2.58e-05	0.00118518
1301	Fcgrt	14132	Fc receptor, IgG, alpha chain transporter	3	0	0	3126	-0.2	0.08325	0.8894	0.000152388	0.502154	0.00810597	1	-0.118495	0.463391	0.999548	-0.460012	3.95e-06	1	-0.0203584	0.794839	0.957641
1302	Btaf1	107182	B-TFIID TATA-box binding protein associated factor 1	3	0	0	3502	0.18	0.1055	0.9415	0.000154393	0.215277	0.00819099	1	0.08021	0.328695	0.999548	0.0561308	0.59933	0.924798	0.410719	7.5e-06	0.000420568
1303	Ndufs1	227197	NADH:ubiquinone oxidoreductase core subunit S1	3	0	0	6204	-0.07	0.3158	1.049	0.000175375	0.613881	0.00913539	1	0.0121061	0.849887	0.999548	-0.0215096	0.643906	0.934976	-0.19249	3.13e-06	0.000202987
1304	Clic1	114584	chloride intracellular channel 1	3	33.3333	0	2632	0.39	0.05762	0.8052	0.000184408	0.0870767	0.00953185	1	-0.267923	0.443235	1	0.4031	0.294415	1	1.03989	1.39e-05	0.000708279
1305	Mycn	18109	v-myc avian myelocytomatosis viral related oncogene, neuroblastoma derived	3	0	0	4455	-0.15	0.1711	1.021	0.000187385	0.173972	0.00966092	1	-0.0834574	0.127536	0.999548	0.0430247	0.558247	0.917098	-0.418807	2.6e-05	0.00118987
1306	Car8	12319	carbonic anhydrase 8	3	0	0	3772	0.3	0.1229	0.9796	0.000191704	0.974091	0.0098583	1	0.0404954	0.850342	0.999548	-0.00152819	0.991288	1	0.860057	2.25e-06	0.000154798
1307	Pip5k1c	18717	phosphatidylinositol-4-phosphate 5-kinase, type 1 gamma	3	0	0	4441	-0.11	0.1701	1.02	0.000193831	0.827004	0.00992326	1	-0.00470138	0.938647	0.999548	-0.05751	0.236059	0.766604	-0.261575	8.68e-06	0.000468139
1308	Camta2	216874	calmodulin binding transcription activator 2	3	0	0	4686	-0.13	0.1888	1.025	0.000193954	0.708962	0.00992326	1	0.0130655	0.891677	0.999548	-0.0864367	0.220248	0.759208	-0.312027	9.8e-06	0.000524143
1309	Plk2	20620	polo like kinase 2	3	0	0	6513	0.08	0.3432	1.072	0.00019751	0.427372	0.0100286	1	-0.070209	0.143674	0.999548	0.015959	0.753244	0.959334	0.286961	1.82e-05	0.000882831
1310	Got2	14719	glutamatic-oxaloacetic transaminase 2, mitochondrial	3	0	0	4702	-0.09	0.19	1.026	0.000199472	0.552256	0.0101027	1	-0.00854664	0.82044	0.999548	-0.07823	0.0168357	0.248644	-0.169487	0.00014398	0.00461205
1311	Tagln2	21346	transgelin 2	3	33.3333	0	1867	0.59	0.02679	0.6178	0.000215669	0.736551	0.0108683	1	-0.049328	0.903097	1	0.722178	0.048869	1	1.09075	4.94e-05	0.0019773
1312	Fosl1	14283	fos-like antigen 1	3	33.3333	0	2977	0.4	0.07506	0.8465	0.000218471	0.530326	0.010946	1	-0.0818129	0.809433	1	0.0939395	0.78638	1	1.18255	3.47e-06	0.000221983
1313	Phyhipl	70911	phytanoyl-CoA hydroxylase interacting protein-like	3	0	0	4807	0.09	0.1982	1.046	0.000218844	0.677905	0.010946	1	0.00817958	0.878462	0.999548	0.062758	0.115857	0.614073	0.200688	2.18e-05	0.00101538
1314	Bag1	12017	BCL2-associated athanogene 1	3	0	0	4784	0.13	0.1964	1.045	0.000224639	0.587108	0.011208	1	-0.0146744	0.837348	0.999548	0.116984	0.0584904	0.463199	0.300357	4.66e-05	0.00190424
1315	Kcnf1	382571	potassium voltage-gated channel, subfamily F, member 1	3	0	0	3384	0.19	0.09832	0.9238	0.000233585	0.968354	0.0115398	1	0.00124091	0.989338	0.999548	0.205542	0.0376807	0.37861	0.355538	6.41e-05	0.00246818
1316	Akr1b10	67861	aldo-keto reductase family 1, member B10 (aldose reductase)	3	0	0	27.45	3.14	1.51e-07	0.003041	0.000250099	0.159413	0.0122952	1	0.174985	0.542219	0.999548	4.10789	0.0627967	1	5.12266	7.6e-05	1
1317	Rassf4	213391	Ras association (RalGDS/AF-6) domain family member 4	3	0	0	3060	0.26	0.07962	0.8584	0.000260056	0.057863	0.0127225	1	0.371772	0.260705	1	-0.230067	0.386783	1	0.641806	2.69e-05	0.00120912
1318	Necab2	117148	N-terminal EF-hand calcium binding protein 2	3	0	0	4579	-0.12	0.1805	1.023	0.000264658	0.305727	0.0128538	1	-0.117503	0.0349182	0.912285	0.0244577	0.673666	0.942588	-0.262766	0.00011757	0.0040178
1319	Sh3bp4	98402	SH3-domain binding protein 4	3	0	0	4373	0.16	0.1651	1.022	0.000268797	0.142905	0.0130234	1	-0.0363651	0.522816	0.999548	0.20606	4.08e-05	0.00295941	0.313958	0.132087	0.50259
1320	Ntsr2	18217	neurotensin receptor 2	3	0	0	2699	-0.21	0.06085	0.8081	0.000270812	0.0620791	0.0130268	1	-0.27511	0.0534517	0.999548	-0.297961	0.00013423	0.00805117	-0.0521254	0.395957	0.797291
1321	4833439L19Rik	97820	RIKEN cDNA 4833439L19 gene	3	0	0	4401	-0.08	0.1672	1.02	0.000272019	0.0908309	0.0130537	1	-0.0347998	0.449515	0.999548	-0.0811338	0.0516921	0.443057	-0.136116	0.000122899	0.00412276
1322	Sh2b2	23921	SH2B adaptor protein 2	3	0	0	3786	0.28	0.1238	0.9784	0.000280749	0.741415	0.0133768	1	-0.0107224	0.905081	0.999548	0.0508684	0.717654	1	0.805266	4.56e-06	0.000278979
1323	Ppp1r13l	333654	protein phosphatase 1, regulatory subunit 13 like	3	33.3333	0	3099	0.07	0.08174	0.8655	0.000282831	0.308111	0.0134442	1	0.1612	0.675413	1	-1.0759	0.0032637	1	1.12809	0.00135591	0.0263438
1324	Bmp2	12156	bone morphogenetic protein 2	3	0	0	2700	0.4	0.06089	0.8162	0.000286483	0.228612	0.0135311	1	-0.123424	0.611458	0.999548	0.471833	0.0355482	1	0.845823	0.000139587	0.00450519
1325	Ano10	102566	anoctamin 10	3	0	0	5687	0.1	0.2707	1.057	0.000286679	0.0762086	0.0135311	1	-0.0667261	0.42397	0.999548	0.0692556	0.339228	0.831681	0.299484	2.11e-05	0.000992124
1326	Slitrk3	386750	SLIT and NTRK-like family, member 3	3	0	0	4744	-0.1	0.1932	1.025	0.000287981	0.0840244	0.0135518	1	0.240205	0.0421593	0.953434	-0.0853592	0.437994	1	-0.452355	0.000165316	0.00513889
1327	Marcks	17118	myristoylated alanine rich protein kinase C substrate	3	0	0	6476	0.05	0.3399	1.071	0.000288753	0.162312	0.0135518	1	-0.0220457	0.545486	0.999548	0.0689895	0.000402678	0.0176027	0.115182	0.0139411	0.138017
1328	Sipa1l2	244668	signal-induced proliferation-associated 1 like 2	3	0	0	3575	0.16	0.1102	0.956	0.000295312	0.197612	0.0137769	1	0.140026	0.220038	0.999548	0.0349081	0.582467	0.924319	0.290643	2.45e-05	0.00114002
1329	Zfp423	94187	zinc finger protein 423	3	0	0	2680	-0.18	0.0599	0.804	0.00029664	0.0623896	0.0138068	1	-0.123551	0.396616	0.999548	-0.134859	0.0586893	0.463199	-0.284821	0.00013577	0.00440424
1330	Klhl26	234378	kelch-like 26	3	0	0	2961	-0.2	0.07424	0.8472	0.000301678	0.180772	0.0140088	1	-0.0682933	0.565428	0.999548	-0.0884336	0.396273	1	-0.445104	1.44e-05	0.000721016
1331	C2	12263	complement component 2 (within H-2S)	3	33.3333	0	818.6	0.87	0.003778	0.2772	0.000317772	0.657699	0.0146692	1	0.118279	0.869646	1	1.14291	0.102363	1	1.35116	3.85e-05	0.00162317
1332	Dclk3	245038	doublecortin-like kinase 3	3	0	0	4347	-0.22	0.1632	1.019	0.000317228	0.849231	0.0146692	1	-0.0170505	0.946982	0.999548	0.144695	0.346413	1	-0.786877	1.04e-05	0.00055267
1333	Cacnb1	12295	calcium channel, voltage-dependent, beta 1 subunit	3	0	0	4470	-0.14	0.1723	1.024	0.000322947	0.974208	0.0148593	1	-0.0914559	0.272172	0.999548	0.00062026	0.991328	0.997702	-0.315134	1.29e-05	0.000669504
1334	Gsn	227753	gelsolin	3	0	0	3665	0.23	0.1159	0.9713	0.000330962	0.659099	0.0151695	1	-0.040712	0.870263	0.999548	0.137049	0.190063	0.722633	0.60686	2.17e-05	0.00101538
1335	Atp6v1b2	11966	ATPase, H+ transporting, lysosomal V1 subunit B2	3	0	0	5534	-0.08	0.2576	1.04	0.000331199	0.767353	0.0151695	1	0.00320104	0.915514	0.999548	-0.0653827	0.00935388	0.175662	-0.189034	0.000419888	0.0110424
1336	Pcmt1	18537	protein-L-isoaspartate (D-aspartate) O-methyltransferase 1	3	0	0	5247	-0.09	0.2336	1.033	0.000335025	0.122076	0.0153099	1	0.0384614	0.496071	0.999548	-0.0746013	0.278335	0.800486	-0.245323	2.64e-05	0.00120057
1337	Mettl7a1	70152	methyltransferase like 7A1	3	0	0	2127	-0.28	0.036	0.6666	0.000336942	0.115701	0.015326	1	-0.341696	0.0329409	0.900598	-0.111031	0.48728	1	-0.384855	0.000228576	0.00676149
1338	Prdx5	54683	peroxiredoxin 5	3	0	0	5310	-0.08	0.2388	1.035	0.000337665	0.200037	0.015326	1	0.0444597	0.584839	0.999548	-0.101114	0.0315628	0.34819	-0.193776	0.000199261	0.00600649
1339	Mtor	56717	mechanistic target of rapamycin kinase	3	0	0	4774	-0.11	0.1956	1.027	0.000338647	0.605291	0.015336	1	0.0205525	0.845905	0.999548	-0.132039	0.0159297	0.239962	-0.211455	0.000273896	0.00790217
1340	B3gat1	76898	beta-1,3-glucuronyltransferase 1 (glucuronosyltransferase P)	3	0	0	7620	-0.06	0.4434	1.127	0.000345857	0.472517	0.0155737	1	0.0142064	0.778883	0.999548	0.0102326	0.754854	0.959566	-0.215162	6.43e-06	0.000373811
1341	Acot7	70025	acyl-CoA thioesterase 7	3	0	0	4046	-0.11	0.1415	1.002	0.0003488	0.195165	0.0156199	1	-0.0258755	0.580053	0.999548	-0.107557	0.00640927	0.136642	-0.203332	0.00102775	0.0217477
1342	Sc5d	235293	sterol-C5-desaturase	3	0	0	4399	-0.11	0.167	1.021	0.000355028	0.869497	0.0158282	1	-0.00311699	0.954456	0.999548	-0.0586815	0.279779	0.800486	-0.271978	1.46e-05	0.000727525
1343	Idh3a	67834	isocitrate dehydrogenase 3 (NAD+) alpha	3	0	0	4949	-0.08	0.2094	1.031	0.00035488	0.174318	0.0158282	1	-0.0242967	0.558617	0.999548	-0.0538971	0.0927319	0.553941	-0.1522	7.53e-05	0.00281296
1344	Actg1	11465	actin, gamma, cytoplasmic 1	3	0	0	6538	-0.05	0.3455	1.065	0.000360858	0.116388	0.0160172	1	0.0198549	0.488243	0.999548	-0.0498636	0.0622245	0.474292	-0.12051	0.000130883	0.0043003
1345	Asrgl1	66514	asparaginase like 1	3	0	0	3619	-0.12	0.113	0.9806	0.000364088	0.0685395	0.0161249	1	-0.0402108	0.409242	0.999548	-0.111946	0.0031305	0.0851903	-0.215083	0.00313639	0.0495503
1346	Cacna2d1	12293	calcium channel, voltage-dependent, alpha2/delta subunit 1	3	0	0	8623	-0.01	0.5335	1.08	0.000368513	0.0929849	0.016285	1	0.141882	0.00291462	0.322432	0.032264	0.453041	0.878264	-0.202686	0.0030865	0.0489436
1347	Ivns1abp	117198	influenza virus NS1A binding protein	3	0	0	4360	0.1	0.1641	1.02	0.000372487	0.391034	0.0164246	1	0.0183313	0.731259	0.999548	0.106297	0.00640027	0.136642	0.184485	0.00088183	0.0193654
1348	Abhd17b	226016	abhydrolase domain containing 17B	3	0	0	4091	0.12	0.1447	1.003	0.000385665	0.597579	0.0168212	1	0.0129219	0.842297	0.999548	0.114413	0.0516255	0.443057	0.245246	9.89e-05	0.00348112
1349	Slc1a5	20514	solute carrier family 1 (neutral amino acid transporter), member 5	3	0	0	1860	-0.52	0.02658	0.6157	0.000391691	0.465101	0.0170102	1	0.136776	0.774787	1	-0.840137	0.00222451	1	-0.870604	0.0025403	0.0425525
1350	Kcng1	241794	potassium voltage-gated channel, subfamily G, member 1	3	0	0	2504	-0.29	0.05167	0.7628	0.000394894	0.745474	0.0171124	1	-0.472762	0.0204048	0.735565	-0.0118382	0.906729	1	-0.394038	0.000238918	0.00703598
1351	Tmem150c	231503	transmembrane protein 150C	3	0	0	2746	-0.23	0.06316	0.813	0.000425521	0.377711	0.0183478	1	-0.388158	0.00100466	0.1884	-0.031192	0.722859	0.952197	-0.261386	0.00664563	0.0840137
1352	Gpr176	381413	G protein-coupled receptor 176	3	33.3333	0	2814	0.4	0.06658	0.8268	0.000426539	0.304881	0.0183478	1	-0.0684461	0.673044	0.999548	0.243282	0.147426	1	1.01284	4.88e-05	0.00196043
1353	Rsph9	75564	radial spoke head 9 homolog (Chlamydomonas)	3	0	0	2963	0.23	0.07434	0.8459	0.000427053	0.161025	0.0183478	1	0.143567	0.159847	0.999548	0.0626088	0.54404	1	0.476152	5.57e-05	0.00219176
1354	Pcare	225004	photoreceptor cilium actin regulator	3	33.3333	0	679.5	1	0.002371	0.2483	0.000428716	0.903842	0.0183799	1	0.0276561	0.966861	1	0.769514	0.248518	1	2.20877	2.03e-05	0.000962775
1355	Tmem229a	319832	transmembrane protein 229A	3	0	0	5745	-0.08	0.2757	1.042	0.000481098	0.398645	0.020153	1	0.094103	0.201084	0.999548	-0.02443	0.735974	0.955316	-0.32422	3.77e-05	0.00159592
1356	Cst6	73720	cystatin E/M	3	0	0	4028	-0.2	0.1403	1.002	0.00048332	0.666116	0.020204	1	-0.0915566	0.453594	0.999548	0.0159506	0.87334	1	-0.53422	1.42e-05	0.000714924
1357	Pdxp	57028	pyridoxal (pyridoxine, vitamin B6) phosphatase	3	0	0	4330	-0.1	0.1619	1.017	0.000485086	0.886135	0.0202357	1	-0.00197894	0.960506	0.999548	-0.105048	0.00481666	0.114163	-0.195331	0.00121727	0.0243473
1358	Creb3l1	26427	cAMP responsive element binding protein 3-like 1	3	0	0	1733	-0.32	0.02261	0.5919	0.000534168	0.138428	0.0219581	1	-0.139234	0.517299	0.999548	-0.200112	0.149743	1	-0.628553	8.15e-05	0.00296694
1359	Lrrn2	16980	leucine rich repeat protein 2, neuronal	3	0	0	5203	-0.08	0.23	1.032	0.00053244	0.47766	0.0219581	1	-0.0154767	0.755522	0.999548	-0.00989451	0.781699	0.964652	-0.201828	1.06e-05	0.000562122
1360	Tubb2a	22151	tubulin, beta 2A class IIA	3	0	0	5490	-0.05	0.2539	1.041	0.000537635	0.894281	0.0220167	1	-0.0016064	0.96344	0.999548	-0.0841429	0.000204313	0.0109595	-0.0780471	0.0323017	0.232722
1361	Rnf122	68867	ring finger protein 122	3	0	0	2060	0.31	0.03351	0.6764	0.000539186	0.184999	0.0220276	1	0.251428	0.0939779	0.999548	0.0911662	0.5698	1	0.603725	0.000119145	0.00404999
1362	Tmco4	77056	transmembrane and coiled-coil domains 4	3	0	0	3275	-0.22	0.09184	0.9224	0.000572102	0.175051	0.0231128	1	0.296836	0.298189	1	-0.126228	0.559399	1	-0.838151	4.1e-05	0.0016968
1363	Gpd1l	333433	glycerol-3-phosphate dehydrogenase 1-like	3	0	0	4555	-0.09	0.1787	1.021	0.000573595	0.58068	0.0231128	1	-0.0102081	0.834281	0.999548	-0.0888783	0.0160923	0.240044	-0.172427	0.000511263	0.0127876
1364	Phyhip	105653	phytanoyl-CoA hydroxylase interacting protein	3	0	0	6176	0.06	0.3133	1.061	0.000571357	0.171886	0.0231128	1	0.592462	0.201202	0.999548	-0.0595677	0.556007	0.915209	-0.351931	6.11e-05	0.00236541
1365	Nsdhl	18194	NAD(P) dependent steroid dehydrogenase-like	3	0	0	4163	-0.15	0.1498	1.01	0.000575324	0.273351	0.0231361	1	-0.023214	0.648993	0.999548	-0.0257302	0.594369	0.924319	-0.394993	1.79e-05	0.000871141
1366	Timp1	21857	tissue inhibitor of metalloproteinase 1	3	0	0	4892	-0.01	0.2049	1.031	0.000580719	0.405645	0.0233064	1	-0.0683711	0.740256	0.999548	-0.444721	0.0176246	1	0.490246	0.000533842	0.0132486
1367	Csrnp1	215418	cysteine-serine-rich nuclear protein 1	3	0	0	2344	0.47	0.04467	0.7256	0.000585067	0.913802	0.0233876	1	0.447263	0.176578	1	-0.0100807	0.9704	1	0.983203	4.1e-05	0.0016968
1368	Sdc4	20971	syndecan 4	3	0	0	3899	-0.15	0.1314	0.9998	0.000617698	0.166148	0.0245456	1	-0.202815	0.0925841	0.999548	-0.278838	0.000147209	0.00856729	0.0412443	0.54975	0.878316
1369	Ap3b2	11775	adaptor-related protein complex 3, beta 2 subunit	3	0	0	4768	-0.08	0.1951	1.027	0.000619479	0.351866	0.0245678	1	-0.0197072	0.70598	0.999548	-0.0991585	0.00526103	0.120798	-0.11662	0.0020242	0.036027
1370	Elmsan1	238317	ELM2 and Myb/SANT-like domain containing 1	3	0	0	6392	0.06	0.3325	1.068	0.000649769	0.945692	0.0255673	1	0.00315255	0.981559	0.999548	-0.21794	0.0533717	1	0.384765	0.00015186	0.00478976
1371	Pmp22	18858	peripheral myelin protein 22	3	0	0	4866	0.14	0.2028	1.044	0.000667683	0.60679	0.0262209	1	-0.0205828	0.846602	0.999548	0.0941596	0.324039	0.826606	0.348727	2.99e-05	0.00131889
1372	Hdac9	79221	histone deacetylase 9	3	0	0	3460	0.16	0.103	0.9363	0.000670933	0.237933	0.0262972	1	0.317919	5.58e-05	0.0262624	0.0511873	0.619657	1	0.120603	0.239025	0.666735
1373	Tmem43	74122	transmembrane protein 43	3	0	0	8018	0.07	0.4794	1.13	0.000708699	0.0926341	0.0276695	1	-0.0935899	0.245291	0.999548	-0.0608742	0.452471	0.878264	0.37826	7.95e-05	0.00291803
1374	Ptn	19242	pleiotrophin	3	0	0	4826	0.09	0.1997	1.047	0.00071445	0.33617	0.02784	1	0.0211975	0.695323	0.999548	0.0614275	0.133232	0.642909	0.172235	9.61e-05	0.00339314
1375	Bcl2l11	12125	BCL2-like 11 (apoptosis facilitator)	3	0	0	1960	0.35	0.02992	0.6463	0.000721537	0.111931	0.0280618	1	0.139978	0.481929	0.999548	0.16267	0.279842	1	0.744717	6.68e-05	0.00254832
1376	Hbegf	15200	heparin-binding EGF-like growth factor	3	0	0	3851	0.14	0.1282	0.989	0.000725558	0.0657265	0.0281637	1	0.134762	0.403565	0.999548	-0.321737	0.0536423	1	0.612674	0.000418865	0.0110382
1377	Dgkg	110197	diacylglycerol kinase, gamma	3	0	0	4307	-0.15	0.1603	1.017	0.000741147	0.285303	0.0287134	1	0.0698345	0.658317	0.999548	-0.131681	0.111942	0.607006	-0.379069	0.000126191	0.00417836
1378	Hsp90ab1	15516	heat shock protein 90 alpha (cytosolic), class B member 1	3	0	0	4896	-0.08	0.2053	1.031	0.000746263	0.362015	0.0288068	1	-0.0130624	0.712703	0.999548	-0.0781836	0.00306838	0.0838882	-0.138928	0.00428732	0.0620532
1379	Trp53inp2	68728	transformation related protein 53 inducible nuclear protein 2	3	0	0	4693	-0.12	0.1893	1.025	0.000772782	0.467071	0.0297669	1	0.0164036	0.77588	0.999548	-0.115605	0.0148382	0.230737	-0.248703	0.000848881	0.018836
1380	Tnfaip8	106869	tumor necrosis factor, alpha-induced protein 8	3	0	0	1374	-0.48	0.01318	0.4844	0.000776379	0.661882	0.0298483	1	-0.0559699	0.871486	1	-0.732797	0.00305899	1	-0.643542	0.0036862	0.0556238
1381	Sms	20603	spermine synthase	3	0	0	5749	0.1	0.276	1.059	0.000810662	0.426348	0.0310476	1	-0.0169885	0.752642	0.999548	0.0408882	0.390296	0.855664	0.277679	3.52e-05	0.00151041
1382	Sesn2	230784	sestrin 2	3	0	0	3085	-0.16	0.081	0.8804	0.000824751	0.239555	0.0315271	1	-0.209975	0.0108146	0.602156	-0.213624	0.00157212	0.0500126	-0.0448473	0.621062	0.90773
1383	Stat3	20848	signal transducer and activator of transcription 3	3	0	0	5778	0.11	0.2785	1.057	0.000833135	0.29303	0.0317872	1	-0.0272819	0.664208	0.999548	0.0316298	0.617041	0.931369	0.314052	2.61e-05	0.00119027
1384	Pdcd6	18570	programmed cell death 6	3	0	0	3941	0.13	0.1343	0.997	0.000837106	0.0713902	0.0318782	1	0.0485808	0.414839	0.999548	0.0926903	0.204267	0.734811	0.240249	0.000126835	0.00418882
1385	Acss1	68738	acyl-CoA synthetase short-chain family member 1	3	0	0	4406	-0.13	0.1675	1.021	0.000839149	0.569343	0.0318956	1	0.0160697	0.828816	0.999548	-0.213103	0.000325873	0.015573	-0.190122	0.0399088	0.261309
1386	Arf4	11843	ADP-ribosylation factor 4	3	0	0	6354	0.07	0.3291	1.065	0.000852043	0.705534	0.0322031	1	-0.00721186	0.890238	0.999548	0.0386815	0.159237	0.681356	0.167086	7.74e-05	0.0028685
1387	Igsf21	230868	immunoglobulin superfamily, member 21	3	0	0	3435	0.15	0.1014	0.9304	0.00086148	0.0587947	0.0324378	1	0.0638425	0.388848	0.999548	0.18403	0.00365877	0.0955103	0.193796	0.00781698	0.0938111
1388	Selenom	114679	selenoprotein M	3	0	0	2931	0.21	0.07265	0.8448	0.000868984	0.21043	0.0326592	1	0.052461	0.594798	0.999548	0.25647	0.0144294	0.227371	0.324479	0.00130924	0.0257834
1389	Laptm4b	114128	lysosomal-associated protein transmembrane 4B	3	0	0	4527	0.11	0.1766	1.038	0.000900458	0.368614	0.0336144	1	0.0352139	0.717008	0.999548	0.0452661	0.372167	0.850202	0.240792	4.39e-05	0.00180546
1390	Vegfa	22339	vascular endothelial growth factor A	3	0	0	6049	0.09	0.3021	1.061	0.000901086	0.115331	0.0336144	1	-0.083347	0.341383	0.999548	0.0505245	0.486761	0.888389	0.290911	7.06e-05	0.00266204
1391	Ywhah	22629	tyrosine 3-monooxygenase/tryptophan 5-monooxygenase activation protein, eta polypeptide	3	0	0	7105	-0.03	0.3967	1.107	0.000931613	0.122661	0.0344971	1	0.0709638	0.0141493	0.652169	-0.0188692	0.496862	0.896585	-0.142955	0.00173654	0.0320732
1392	Adcyap1r1	11517	adenylate cyclase activating polypeptide 1 receptor 1	3	0	0	3472	-0.12	0.1037	0.9601	0.000967756	0.0961872	0.0356386	1	-0.127404	0.0444442	0.956359	-0.133432	0.000627363	0.0256086	-0.092399	0.458183	0.831602
1393	Dgkz	104418	diacylglycerol kinase zeta	3	0	0	4262	-0.1	0.157	1.017	0.00097698	0.148398	0.0358049	1	-0.0402151	0.518031	0.999548	-0.0244846	0.52943	0.906808	-0.248594	4.71e-05	0.00191761
1394	Gabbr2	242425	gamma-aminobutyric acid (GABA) B receptor, 2	3	0	0	5023	-0.1	0.2154	1.029	0.000977615	0.454101	0.0358049	1	0.0336771	0.76863	0.999548	-0.121071	0.0298759	0.340067	-0.198568	0.000563103	0.013761
1395	Pfkm	18642	phosphofructokinase, muscle	3	0	0	5634	-0.07	0.2662	1.039	0.000977132	0.40979	0.0358049	1	0.0187566	0.742769	0.999548	-0.11082	0.00586211	0.129341	-0.127636	0.00296799	0.0475958
1396	Got1	14718	glutamic-oxaloacetic transaminase 1, soluble	3	0	0	5635	-0.08	0.2662	1.039	0.000986462	0.140333	0.0359978	1	0.0344454	0.519661	0.999548	-0.0547447	0.283926	0.801108	-0.220122	8.86e-05	0.00314508
1397	Osgin1	71839	oxidative stress induced growth inhibitor 1	3	0	0	1336	-0.51	0.01233	0.4703	0.00100352	0.099876	0.0364878	1	-0.610644	0.0137634	0.642526	-0.734045	0.00208916	1	-0.190979	0.463967	0.834971
1398	Lztr1	66863	leucine-zipper-like transcriptional regulator, 1	3	0	0	4197	-0.1	0.1522	1.014	0.00101238	0.0817159	0.0367435	1	-0.0445051	0.433946	0.999548	-0.0440783	0.359617	0.844519	-0.21035	8.64e-05	0.00309255
1399	Tm7sf2	73166	transmembrane 7 superfamily member 2	3	0	0	4678	-0.14	0.1881	1.026	0.00101707	0.985281	0.0368471	1	-0.0603727	0.45368	0.999548	0.000413028	0.99507	0.998049	-0.352273	3e-05	0.00131889
1400	Tagln3	56370	transgelin 3	3	0	0	3900	0.13	0.1315	0.9934	0.00104559	0.253351	0.0376093	1	0.0701641	0.277868	0.999548	0.295784	7.97e-05	0.00532299	0.0275974	0.632762	0.912214
1401	Dhcr7	13360	7-dehydrocholesterol reductase	3	0	0	4123	-0.14	0.147	1.007	0.001044	0.237008	0.0376093	1	-0.0227975	0.618853	0.999548	-0.0394025	0.287988	0.806475	-0.357025	7.85e-05	0.00289425
1402	Tecpr1	70381	tectonin beta-propeller repeat containing 1	3	0	0	4639	-0.13	0.1852	1.026	0.00104498	0.125743	0.0376093	1	0.0659493	0.500988	0.999548	-0.0977627	0.19323	0.72622	-0.355763	0.000144639	0.00462157
1403	Id3	15903	inhibitor of DNA binding 3	3	33.3333	0	2001	0.59	0.03137	0.6613	0.00105035	0.584251	0.0376458	1	-0.0379528	0.835988	0.999548	0.3464	0.0313474	0.347006	1.45592	0.00053758	0.0132649
1404	Phc2	54383	polyhomeotic 2	3	0	0	3932	0.13	0.1336	0.9944	0.00104906	0.161087	0.0376458	1	0.0310967	0.54411	0.999548	0.110639	0.0558867	0.455985	0.249774	0.000462609	0.0119157
1405	Sstr1	20605	somatostatin receptor 1	3	0	0	4454	0.13	0.1711	1.027	0.00108048	0.792819	0.0385885	1	0.0248478	0.771045	0.999548	0.36692	2.04e-05	0.00164425	0.0108464	0.925532	0.986253
1406	Gja1	14609	gap junction protein, alpha 1	3	0	0	6499	-0.05	0.342	1.063	0.00109687	0.702328	0.0391042	1	-0.00976382	0.888887	0.999548	-0.186144	4.35e-05	0.00311593	0.0580646	0.383999	0.790428
1407	Kifap3	16579	kinesin-associated protein 3	3	0	0	5555	-0.08	0.2594	1.037	0.00109942	0.426259	0.0391257	1	0.0148561	0.752589	0.999548	-0.0951825	0.0139137	0.222241	-0.152531	0.00142087	0.0272675
1408	Ap3d1	11776	adaptor-related protein complex 3, delta 1 subunit	3	0	0	4640	-0.08	0.1852	1.026	0.00110322	0.336552	0.0391917	1	-0.0294864	0.695586	0.999548	-0.109505	0.00159959	0.0500126	-0.107518	0.0134274	0.1346
1409	Stmn1	16765	stathmin 1	3	0	0	4582	0.1	0.1808	1.038	0.00111597	0.0961576	0.0395746	1	0.0307315	0.458136	0.999548	0.0471136	0.170598	0.693697	0.234963	0.000193797	0.00586949
1410	Zfp281	226442	zinc finger protein 281	3	0	0	4686	0.13	0.1888	1.041	0.00114096	0.552974	0.0402478	1	-0.0156203	0.820796	0.999548	0.181363	0.00974435	0.180117	0.215996	0.00194464	0.034957
1411	Nes	18008	nestin	3	0	0	3424	0.2	0.1008	0.9297	0.00117287	0.655632	0.041229	1	0.0256836	0.868734	0.999548	0.111668	0.221636	0.759902	0.47387	8.35e-05	0.00302298
1412	Ostm1	14628	osteopetrosis associated transmembrane protein 1	3	0	0	4181	-0.11	0.1511	1.012	0.00117825	0.866813	0.0413458	1	-0.00403206	0.953473	0.999548	-0.114841	0.0745784	0.516889	-0.205103	0.000227317	0.00674091
1413	Podxl2	319655	podocalyxin-like 2	3	0	0	4761	0.09	0.1946	1.042	0.00119497	0.319042	0.0418594	1	0.0146192	0.683307	0.999548	0.0739668	0.0356457	0.368576	0.173715	0.000674929	0.0158863
1414	Lhfpl2	218454	lipoma HMGIC fusion partner-like 2	3	0	0	4161	0.19	0.1497	1.012	0.00120065	0.290854	0.0419853	1	-0.0537564	0.66256	0.999548	0.207757	0.0330248	0.357495	0.40709	0.000755586	0.0172072
1415	Wsb2	59043	WD repeat and SOCS box-containing 2	3	0	0	4235	-0.09	0.155	1.018	0.00122793	0.0590471	0.0424956	1	-0.076363	0.0321585	0.900598	-0.036777	0.389403	0.855664	-0.162401	0.00135627	0.0263438
1416	Gnai2	14678	guanine nucleotide binding protein (G protein), alpha inhibiting 2	3	0	0	5642	-0.06	0.2669	1.039	0.00122587	0.854239	0.0424956	1	-0.0667136	0.0809865	0.999548	-0.10829	0.000220578	0.0115764	0.0028066	0.94884	0.988833
1417	Selenow	20364	selenoprotein W	3	0	0	1870	-0.44	0.02692	0.6173	0.00124764	0.0703696	0.0428825	1	-1.03415	0.341844	1	-0.035239	0.412853	0.865576	-0.250377	0.000122662	0.00412276
1418	Mafk	17135	v-maf musculoaponeurotic fibrosarcoma oncogene family, protein K (avian)	3	0	0	2883	0.22	0.07009	0.833	0.00128514	0.178103	0.0439462	1	0.134092	0.370393	0.999548	0.0872472	0.562631	1	0.449857	8.61e-05	0.00309021
1419	AW551984	244810	expressed sequence AW551984	3	0	0	3418	0.2	0.1004	0.9274	0.001299	0.623302	0.0440732	1	0.0212566	0.854213	0.999548	0.121502	0.25082	1	0.457301	8.48e-05	0.00306185
1420	Nckipsd	80987	NCK interacting protein with SH3 domain	3	0	0	5546	-0.1	0.2587	1.038	0.00129444	0.467027	0.0440732	1	0.0459643	0.681823	0.999548	-0.028512	0.775855	1	-0.317436	3.42e-05	0.00147208
1421	Mios	252875	meiosis regulator for oocyte development	3	0	0	4749	0.14	0.1936	1.043	0.00130106	0.115911	0.0440732	1	-0.0612627	0.487575	0.999548	0.154977	0.095392	0.560714	0.324617	0.000391399	0.0104654
1422	Shisa7	232813	shisa family member 7	3	0	0	4706	-0.12	0.1903	1.026	0.00131832	0.221678	0.0444757	1	-0.0857722	0.605212	0.999548	0.0726703	0.512927	0.902892	-0.360004	5.96e-05	0.00232152
1423	Ppp2r5d	21770	protein phosphatase 2, regulatory subunit B', delta	3	0	0	3812	-0.11	0.1255	0.9879	0.00132148	0.150278	0.0445074	1	-0.036245	0.531657	0.999548	-0.0997727	0.0498092	0.436983	-0.202284	0.000700404	0.0163058
1424	Efr3a	76740	EFR3 homolog A	3	0	0	5847	0.09	0.2844	1.057	0.00132799	0.575168	0.0446519	1	-0.0165556	0.831633	0.999548	0.0593454	0.348871	0.840738	0.213112	6.43e-05	0.00246818
1425	Vcp	269523	valosin containing protein	3	0	0	5703	-0.05	0.272	1.041	0.00135146	0.702357	0.0452897	1	-0.00408237	0.888899	0.999548	-0.0644305	0.00107077	0.0376887	-0.0798223	0.0200189	0.176005
1426	Ankrd33b	67434	ankyrin repeat domain 33B	3	0	0	3669	0.21	0.1162	0.9715	0.00138361	0.27534	0.0462129	1	0.320034	0.650564	1	-0.25685	0.463627	1	0.575505	6.5e-05	0.00248664
1427	Camkk1	55984	calcium/calmodulin-dependent protein kinase kinase 1, alpha	3	0	0	3416	-0.16	0.1003	0.9505	0.00138614	0.952124	0.0462207	1	-0.127448	0.197537	0.999548	-0.00202089	0.98378	0.997702	-0.336479	0.000101079	0.00353942
1428	Ddah2	51793	dimethylarginine dimethylaminohydrolase 2	3	0	0	3667	0.14	0.1161	0.9719	0.00140072	0.145898	0.0465526	1	0.0437768	0.526441	0.999548	0.171358	0.00227237	0.0664527	0.192305	0.016628	0.15558
1429	P4hb	18453	prolyl 4-hydroxylase, beta polypeptide	3	0	0	9389	0.02	0.6001	1.067	0.00139871	0.791786	0.0465526	1	-0.0925193	0.030333	0.876253	-0.00331061	0.92513	0.989774	0.142818	0.000707623	0.0163843
1430	Mapre2	212307	microtubule-associated protein, RP/EB family, member 2	3	0	0	5185	0.06	0.2285	1.047	0.00143159	0.409163	0.0475001	1	0.0939288	0.00518481	0.437899	0.081116	0.005305	0.120864	0.0135406	0.74239	0.94326
1431	Zdbf2	73884	zinc finger, DBF-type containing 2	3	0	0	2554	0.28	0.05397	0.783	0.0015564	0.207182	0.0512185	1	0.246601	0.0326986	0.900598	0.0684841	0.591722	1	0.513522	0.00116704	0.0236387
1432	Fgl2	14190	fibrinogen-like protein 2	3	0	0	1491	0.56	0.01596	0.4959	0.0015832	0.201806	0.0520153	1	1.00342	0.0289304	1	0.100559	0.586559	1	0.578531	0.00135831	0.0263438
1433	Calu	12321	calumenin	3	0	0	5489	-0.06	0.2539	1.042	0.00159127	0.833672	0.0521952	1	-0.0646265	0.0895523	0.999548	-0.127211	0.00027516	0.0135915	0.00459144	0.941163	0.987507
1434	Kcnk4	16528	potassium channel, subfamily K, member 4	3	0	0	3199	-0.18	0.0874	0.9063	0.00160657	0.196629	0.0523555	1	0.447529	0.233118	1	-0.141127	0.581499	1	-0.854313	0.000173066	0.00533001
1435	Slc6a1	232333	solute carrier family 6 (neurotransmitter transporter, GABA), member 1	3	0	0	6372	-0.05	0.3306	1.053	0.00160656	0.644145	0.0523555	1	0.00827948	0.86363	0.999548	-0.113798	0.000139992	0.00822875	-0.0478466	0.194044	0.613879
1436	Abi2	329165	abl-interactor 2	3	0	0	6317	-0.05	0.3257	1.054	0.00163065	0.121884	0.0529685	1	0.0743777	0.162168	0.999548	-0.0314782	0.49581	0.895956	-0.201295	0.000297059	0.00843499
1437	Wnt4	22417	wingless-type MMTV integration site family, member 4	3	0	0	2522	-0.26	0.05247	0.7684	0.0016334	0.419958	0.0529722	1	-0.0603542	0.748863	0.999548	-0.160092	0.31129	1	-0.552769	0.000102669	0.00357551
1438	Jmjd1c	108829	jumonji domain containing 1C	3	0	0	3467	0.17	0.1034	0.937	0.00164087	0.100781	0.0530432	1	0.080654	0.457818	0.999548	0.0725853	0.465364	0.881895	0.366173	0.000112956	0.00390185
1439	Sh3glb1	54673	SH3-domain GRB2-like B1 (endophilin)	3	0	0	5772	0.11	0.278	1.059	0.00164788	0.207173	0.0531843	1	0.0357761	0.591713	0.999548	-0.0513149	0.501723	0.898367	0.335378	8.15e-05	0.00296694
1440	Csdc2	105859	cold shock domain containing C2, RNA binding	3	0	0	6244	0.07	0.3193	1.063	0.00165611	0.189623	0.0532792	1	0.0450183	0.33905	0.999548	-0.02219	0.574509	0.923996	0.187031	0.000124933	0.00415031
1441	Rgs14	51791	regulator of G-protein signaling 14	3	0	0	7074	-0.09	0.3938	1.106	0.00165406	0.505322	0.0532792	1	0.161286	0.303187	0.999548	0.0304469	0.796506	1	-0.45996	0.000100621	0.00353307
1442	Tmem176b	65963	transmembrane protein 176B	3	0	0	6087	0.16	0.3054	1.061	0.00166861	0.621564	0.0535099	1	-0.250167	0.536632	1	-0.0570651	0.853418	1	0.782086	5.36e-05	0.00212389
1443	Fchsd1	319262	FCH and double SH3 domains 1	3	0	0	2708	0.26	0.06125	0.8167	0.00169868	0.297606	0.054215	1	0.0408534	0.667647	0.999548	0.283225	0.0278635	1	0.457954	0.00134881	0.0262793
1444	Sh2d3c	27387	SH2 domain containing 3C	3	0	0	2817	0.2	0.06671	0.8269	0.00169793	0.0827592	0.054215	1	0.292053	0.00811678	0.513166	0.218797	0.00708996	0.144704	0.0824743	0.435785	0.82072
1445	Tpm4	326618	tropomyosin 4	3	0	0	5122	0.15	0.2234	1.043	0.00169381	0.893228	0.054215	1	-0.00390846	0.963062	0.999548	0.0386276	0.689442	1	0.423164	3.77e-05	0.00159592
1446	Hs2st1	23908	heparan sulfate 2-O-sulfotransferase 1	3	0	0	4765	0.09	0.1949	1.042	0.00172744	0.428652	0.0549582	1	0.018266	0.753995	0.999548	0.0569605	0.231508	0.762849	0.200831	0.000146689	0.00466376
1447	Glrx	93692	glutaredoxin	3	0	0	3960	-0.11	0.1356	1	0.00173766	0.18025	0.055196	1	-0.0385832	0.564883	0.999548	-0.0665362	0.254494	0.78353	-0.22688	0.000179386	0.00545888
1448	Flnc	68794	filamin C, gamma	3	33.3333	0	728.6	0.87	0.002827	0.2483	0.00175938	0.135347	0.0557978	1	-0.939542	0.513432	1	0.94007	0.259729	1	2.60585	0.000196306	0.00593141
1449	Synj1	104015	synaptojanin 1	3	0	0	4315	-0.1	0.1608	1.018	0.00177072	0.653932	0.0559808	1	-0.0130007	0.867982	0.999548	-0.0930024	0.0681197	0.49433	-0.199314	0.000446194	0.0116384
1450	Cyp7b1	13123	cytochrome P450, family 7, subfamily b, polypeptide 1	3	0	0	3262	-0.15	0.09106	0.9178	0.00177573	0.161941	0.0560513	1	-0.0638542	0.54507	0.999548	-0.245605	0.000482382	0.0202694	-0.132183	0.100681	0.437309
1451	Mast3	546071	microtubule associated serine/threonine kinase 3	3	0	0	3897	-0.14	0.1313	0.9997	0.00181312	0.716614	0.0571417	1	-0.016258	0.894874	0.999548	-0.0741665	0.284416	0.801108	-0.338501	0.000106661	0.00370444
1452	Herc3	73998	hect domain and RLD 3	3	0	0	5974	-0.08	0.2955	1.04	0.0018782	0.358705	0.0590077	1	0.0293137	0.710525	0.999548	-0.0230973	0.656124	0.938396	-0.232095	6.08e-05	0.00236069
1453	Aldh2	11669	aldehyde dehydrogenase 2, mitochondrial	3	0	0	3257	-0.14	0.09077	0.9158	0.00191065	0.0983007	0.0595824	1	-0.0647181	0.461515	0.999548	-0.224596	0.00142911	0.0466683	-0.142467	0.0438511	0.277182
1454	Snx18	170625	sorting nexin 18	3	0	0	3820	0.15	0.1261	0.9847	0.00190379	0.918091	0.0595824	1	0.00327704	0.971916	0.999548	0.152103	0.0433191	0.403955	0.282763	0.000683965	0.0160399
1455	Cdc42se1	57912	CDC42 small effector 1	3	0	0	5021	0.11	0.2153	1.045	0.0019091	0.236952	0.0595824	1	-0.0267953	0.618805	0.999548	0.142523	0.015157	0.233827	0.218895	0.00308063	0.0489436
1456	Champ1	101994	chromosome alignment maintaining phosphoprotein 1	3	0	0	3962	0.13	0.1357	0.9991	0.00193821	0.113698	0.0602344	1	0.0767208	0.314065	0.999548	0.0481288	0.484453	0.887384	0.274807	0.000193414	0.00586949
1457	Tecr	106529	trans-2,3-enoyl-CoA reductase	3	0	0	4666	-0.09	0.1872	1.026	0.00193683	0.0897931	0.0602344	1	-0.0333635	0.447797	0.999548	-0.0302801	0.298848	0.815036	-0.215913	0.000219711	0.00654574
1458	2020-09-06	56526	septin 6	3	0	0	3893	0.14	0.131	0.9915	0.00196388	0.09899	0.0608729	1	0.0759738	0.203575	0.999548	0.0496373	0.462591	0.880914	0.294015	0.000317506	0.00891879
1459	Slc25a29	214663	solute carrier family 25 (mitochondrial carrier, palmitoylcarnitine transporter), member 29	3	0	0	2759	-0.19	0.06379	0.8118	0.00197773	0.159791	0.0609996	1	-0.221492	0.0204333	0.735565	-0.0540911	0.542647	0.912902	-0.306682	0.00271963	0.0444692
1460	Rab3d	19340	RAB3D, member RAS oncogene family	3	0	0	4778	-0.15	0.1959	1.026	0.0019786	0.134525	0.0609996	1	0.0551163	0.435203	0.999548	-0.0571662	0.51239	0.902892	-0.460461	0.000135302	0.00440424
1461	Stx1a	20907	syntaxin 1A (brain)	3	0	0	5240	-0.09	0.233	1.032	0.00197254	0.789578	0.0609996	1	0.00369905	0.924269	0.999548	-0.0870164	0.0671792	0.492083	-0.192431	0.000484121	0.0122284
1462	Rnf157	217340	ring finger protein 157	3	0	0	7392	-0.07	0.4227	1.119	0.00199342	0.707153	0.0612869	1	0.0541392	0.49824	0.999548	0.00910782	0.890918	0.983137	-0.278684	6.86e-05	0.00260124
1463	Myl9	98932	myosin, light polypeptide 9, regulatory	3	0	0	1770	-0.34	0.02372	0.5992	0.00201882	0.0649213	0.0619732	1	-0.197017	0.40191	0.999548	-0.479029	0.00224015	1	-0.35747	0.0343381	0.240627
1464	Sqstm1	18412	sequestosome 1	3	0	0	4302	-0.08	0.1599	1.017	0.00205259	0.0616497	0.0629137	1	-0.0760191	0.0470821	0.970049	-0.0998589	0.00169593	0.0524668	-0.067865	0.395042	0.796504
1465	Slc26a3	13487	solute carrier family 26, member 3	3	0	0	1695	0.25	0.02147	0.5607	0.00206614	0.186963	0.0630409	1	-1.75796	0.152254	1	-0.492104	0.57181	1	3.00282	0.000365217	1
1466	Sec14l1	74136	SEC14-like lipid binding 1	3	0	0	5302	-0.09	0.2382	1.034	0.00206575	0.150416	0.0630409	1	0.04184	0.53182	0.999548	-0.0923835	0.128006	0.635479	-0.205766	0.000466956	0.0119503
1467	Sparcl1	13602	SPARC-like 1	3	0	0	3367	-0.13	0.09732	0.9399	0.0021035	0.172861	0.0638899	1	-0.0779514	0.557056	0.999548	-0.100905	0.0593163	0.465107	-0.21567	0.000983402	0.0210534
1468	Pja2	224938	praja ring finger ubiquitin ligase 2	3	0	0	6259	-0.06	0.3206	1.053	0.00210108	0.0806413	0.0638899	1	0.0241862	0.432035	0.999548	-0.053855	0.0568077	0.457531	-0.144013	0.00132212	0.0259571
1469	Ube3c	100763	ubiquitin protein ligase E3C	3	0	0	6344	-0.06	0.3282	1.052	0.00217331	0.433952	0.0658115	1	0.0112468	0.757089	0.999548	-0.0324435	0.37743	0.854268	-0.159985	0.000118309	0.00403227
1470	Myo18a	360013	myosin XVIIIA	3	0	0	4934	-0.11	0.2082	1.032	0.00219048	0.511027	0.0662316	1	0.0335772	0.799493	0.999548	-0.0936094	0.0903587	0.550963	-0.259914	0.000472456	0.0120504
1471	Opa1	74143	OPA1, mitochondrial dynamin like GTPase	3	0	0	6149	-0.07	0.3109	1.048	0.00221487	0.552739	0.0666682	1	0.0202986	0.820679	0.999548	-0.0329214	0.621055	0.931369	-0.185147	6.79e-05	0.00258168
1472	Trim2	80890	tripartite motif-containing 2	3	0	0	6050	-0.06	0.3021	1.045	0.00221843	0.375275	0.0666756	1	0.0208518	0.721301	0.999548	-0.0893287	0.0126944	0.213384	-0.111777	0.00378529	0.0567837
1473	Dpysl5	65254	dihydropyrimidinase-like 5	3	0	0	2508	0.71	0.05187	0.7703	0.00224784	0.240939	0.0672578	1	2.31546	0.622256	1	-0.116331	0.0002731	0.0135915	-0.069325	0.207242	0.63171
1474	Lxn	17035	latexin	3	0	0	3253	-0.14	0.09054	0.9144	0.00225986	0.404412	0.0673098	1	-0.176845	0.030213	0.875069	-0.229686	0.00158653	0.0500126	-0.0231094	0.739505	0.942128
1475	Phlda1	21664	pleckstrin homology like domain, family A, member 1	3	0	0	4710	0.16	0.1906	1.042	0.0022628	0.637266	0.0673098	1	-0.0184037	0.860545	0.999548	0.0907767	0.333746	1	0.404332	0.000123617	0.00413599
1476	Stk38l	232533	serine/threonine kinase 38 like	3	0	0	4705	0.15	0.1902	1.042	0.00225762	0.570869	0.0673098	1	-0.0248767	0.829556	0.999548	0.106225	0.302103	0.815036	0.368435	0.000141273	0.00454814
1477	Adh5	11532	alcohol dehydrogenase 5 (class III), chi polypeptide	3	0	0	5814	0.09	0.2816	1.056	0.00227822	0.682138	0.0676635	1	-0.00834083	0.880287	0.999548	0.057337	0.230211	0.762849	0.211186	0.000176644	0.00540921
1478	Fstl1	14314	follistatin-like 1	3	0	0	3516	0.15	0.1065	0.9434	0.00233206	0.365249	0.0690586	1	0.0350748	0.71482	0.999548	0.206341	0.00728234	0.144999	0.212282	0.00707468	0.0876177
1479	Gmeb1	56809	glucocorticoid modulatory element binding protein 1	3	0	0	2968	0.21	0.07458	0.8444	0.0023446	0.0665147	0.0692261	1	0.0844794	0.405172	0.999548	0.140719	0.307967	1	0.401578	0.000297071	0.00843499
1480	Tmem9b	56786	TMEM9 domain family, member B	3	0	0	4347	-0.09	0.1631	1.02	0.00234119	0.146705	0.0692261	1	-0.0381671	0.52741	0.999548	-0.0647606	0.201899	0.733289	-0.163089	0.000347499	0.00953088
1481	Sptan1	20740	spectrin alpha, non-erythrocytic 1	3	0	0	3486	-0.13	0.1045	0.962	0.00236096	0.527678	0.0696066	1	-0.0469305	0.808084	0.999548	-0.110642	0.0722921	0.508902	-0.235401	0.000639918	0.0151904
1482	Zer1	227693	zyg-11 related, cell cycle regulator	3	0	0	4395	-0.1	0.1667	1.021	0.00239466	0.617773	0.0702911	1	-0.00993518	0.85168	0.999548	-0.117454	0.00494903	0.115776	-0.159865	0.00902316	0.102785
1483	Rasgef1a	70727	RasGEF domain family, member 1A	3	0	0	7796	-0.02	0.4594	1.127	0.00242241	0.153222	0.0710019	1	0.225375	0.0647781	0.999548	0.0631735	0.535106	1	-0.35417	0.00111268	0.0230116
1484	H2afv	77605	H2A histone family, member V	3	0	0	5377	0.09	0.2444	1.058	0.00242636	0.252295	0.0710143	1	-0.0441068	0.631882	0.999548	0.208708	0.000369502	0.0169682	0.118211	0.165519	0.56853
1485	Pitpnm1	18739	phosphatidylinositol transfer protein, membrane-associated 1	3	0	0	5247	-0.09	0.2337	1.032	0.00244312	0.552398	0.071091	1	0.0140269	0.82051	0.999548	-0.0752003	0.0517594	0.443057	-0.22132	0.000917622	0.0199119
1486	Ppfia3	76787	protein tyrosine phosphatase, receptor type, f polypeptide (PTPRF), interacting protein (liprin), alpha 3	3	0	0	5245	-0.08	0.2335	1.032	0.00244139	0.0939803	0.071091	1	0.0532808	0.454652	0.999548	-0.173744	0.000846879	0.0307281	-0.127864	0.101126	0.438281
1487	Rhoc	11853	ras homolog family member C	3	0	0	5612	0.1	0.2643	1.06	0.00243832	0.167119	0.071091	1	0.0696432	0.550818	0.999548	-0.0539712	0.46906	0.883147	0.272016	0.000150473	0.00477221
1488	Clstn2	64085	calsyntenin 2	3	0	0	2722	0.28	0.06196	0.817	0.0024672	0.645631	0.0716879	1	0.0262253	0.864294	0.999548	0.325565	0.0300409	1	0.473935	0.00151896	0.0288466
1489	Lamp5	76161	lysosomal-associated membrane protein family, member 5	3	0	0	2516	-0.26	0.05221	0.7663	0.00247823	0.916513	0.0719045	1	-0.128001	0.847959	1	-0.00960999	0.971358	1	-0.64737	4.81e-05	0.00194679
1490	Nr4a1	15370	nuclear receptor subfamily 4, group A, member 1	3	0	0	1924	0.36	0.02871	0.6323	0.00254063	0.227647	0.0735895	1	0.559992	0.00690813	0.483917	0.424578	0.00968961	1	0.0811627	0.610596	0.901868
1491	Spata13	219140	spermatogenesis associated 13	3	0	0	2919	0.29	0.07202	0.8414	0.00254728	0.479022	0.0735895	1	0.0456617	0.782442	0.999548	0.0466607	0.746756	1	0.775833	7.02e-05	0.00265352
1492	Tfrc	22042	transferrin receptor	3	0	0	5672	0.12	0.2694	1.057	0.00254547	0.199564	0.0735895	1	-0.0431841	0.511622	0.999548	0.0463052	0.584378	0.924319	0.349405	0.00013702	0.00443355
1493	Itpr1	16438	inositol 1,4,5-trisphosphate receptor 1	3	0	0	2192	-0.3	0.0385	0.6838	0.00255196	0.448802	0.0736189	1	-0.06443	0.765629	0.999548	-0.37209	0.0191431	1	-0.476056	0.00280378	0.0455917
1494	Rela	19697	v-rel reticuloendotheliosis viral oncogene homolog A (avian)	3	0	0	4543	0.13	0.1778	1.035	0.00261113	0.764989	0.0751101	1	0.0318013	0.738208	0.999548	0.00938775	0.914573	0.987634	0.348941	6.26e-05	0.00241678
1495	Calm3	12315	calmodulin 3	3	0	0	4912	-0.08	0.2065	1.03	0.00262634	0.149938	0.0754399	1	-0.0288124	0.531256	0.999548	-0.0338346	0.389064	0.855664	-0.180943	0.000205896	0.00619189
1496	Pfkfb3	170768	6-phosphofructo-2-kinase/fructose-2,6-biphosphatase 3	3	0	0	8833	0.03	0.5521	1.083	0.00268079	0.243159	0.0764578	1	-0.116354	0.0933074	0.999548	-0.0363975	0.624161	0.931369	0.238796	0.00074924	0.0171307
1497	Cmpk2	22169	cytidine monophosphate (UMP-CMP) kinase 2, mitochondrial	3	0	0	2614	-0.21	0.05675	0.7875	0.00270877	0.147594	0.0767116	1	-0.213307	0.0709747	0.999548	-0.068124	0.528473	1	-0.345532	0.00117816	0.023826
1498	Dcc	13176	deleted in colorectal carcinoma	3	0	0	3584	0.27	0.1107	0.9577	0.00269926	0.165473	0.0767116	1	0.532248	0.000853184	0.165608	-0.0851403	0.549004	1	0.354049	0.09394	0.422917
1499	Gucy1a1	60596	guanylate cyclase 1, soluble, alpha 1	3	0	0	3637	-0.14	0.1141	0.9838	0.00270572	0.258609	0.0767116	1	-0.0801085	0.105048	0.999548	-0.0272773	0.63711	0.934361	-0.307463	0.000659374	0.0155776
1500	Mgea5	76055	meningioma expressed antigen 5 (hyaluronidase)	3	0	0	5481	-0.08	0.2532	1.041	0.00270851	0.231591	0.0767116	1	0.0282589	0.614102	0.999548	-0.118688	0.00179983	0.0553895	-0.141693	0.0399769	0.261409
1501	Fasn	14104	fatty acid synthase	3	0	0	3399	0.14	0.09923	0.9245	0.00271692	0.0826249	0.0768342	1	0.0903288	0.435549	0.999548	0.166125	0.00159882	0.0500126	0.174112	0.0636919	0.34032
1502	Parm1	231440	prostate androgen-regulated mucin-like protein 1	3	0	0	2836	0.23	0.06767	0.8291	0.00279672	0.317708	0.0787585	1	0.318871	0.0690299	0.999548	0.0453023	0.682353	0.944901	0.333474	0.000975462	0.0209958
1503	Kif21b	16565	kinesin family member 21B	3	0	0	4153	-0.15	0.1491	1.012	0.00285506	0.243233	0.0798425	1	0.0726739	0.624225	0.999548	-0.17659	0.0297796	0.339892	-0.332153	0.0025348	0.042516
1504	Ptms	69202	parathymosin	3	0	0	7881	-0.05	0.4671	1.128	0.00286803	0.0904249	0.0800938	1	0.0529282	0.39647	0.999548	0.0317166	0.448845	0.878264	-0.240477	0.000266256	0.0077166
1505	Gpnmb	93695	glycoprotein (transmembrane) nmb	3	0	0	982	0.69	0.0059	0.3332	0.00289115	0.203497	0.0806275	1	0.248172	0.588192	1	1.10089	0.00456791	1	0.725444	0.0178085	0.162116
1506	Mfap3l	71306	microfibrillar-associated protein 3-like	3	0	0	4603	-0.14	0.1824	1.023	0.00290593	0.0579617	0.0809274	1	0.13729	0.259229	0.999548	-0.0872887	0.387002	0.855664	-0.473276	0.000479924	0.0121463
1507	Camkk2	207565	calcium/calmodulin-dependent protein kinase kinase 2, beta	3	0	0	3618	-0.22	0.1129	0.9807	0.0029309	0.369529	0.0815098	1	0.0457047	0.717601	0.999548	-0.0813751	0.560873	1	-0.638241	0.000120882	0.00408797
1508	Acss2	60525	acyl-CoA synthetase short-chain family member 2	3	0	0	2846	-0.18	0.06819	0.828	0.0030219	0.0743356	0.0828315	1	-0.144739	0.112148	0.999548	-0.0689999	0.420467	0.867158	-0.331911	0.00107106	0.0224884
1509	Unc5c	22253	unc-5 netrin receptor C	3	0	0	2982	0.19	0.07538	0.8486	0.00301276	0.184837	0.0828315	1	0.256339	0.00299045	0.322432	0.0699569	0.569635	1	0.251284	0.0295388	0.221169
1510	Pon2	330260	paraoxonase 2	3	0	0	3726	-0.12	0.1198	0.9864	0.00301606	0.39738	0.0828315	1	-0.094046	0.274597	0.999548	-0.235196	0.000249581	0.0129826	-0.0206022	0.735194	0.941039
1511	Trim47	217333	tripartite motif-containing 47	3	0	0	4307	0.13	0.1602	1.019	0.00299933	0.124707	0.0828315	1	0.170601	0.49961	0.999548	-0.298229	0.210749	1	0.518035	0.000475291	0.0120769
1512	Prdx4	53381	peroxiredoxin 4	3	0	0	4651	0.14	0.1861	1.04	0.00300198	0.396846	0.0828315	1	-0.0306614	0.734865	0.999548	0.135953	0.113344	0.610108	0.325973	0.000601475	0.0145065
1513	Pls3	102866	plastin 3 (T-isoform)	3	0	0	3802	-0.15	0.1249	0.9888	0.00305701	0.672552	0.0835153	1	-0.21151	0.0953759	0.999548	-0.235931	0.000612994	0.0253745	0.0113471	0.876144	0.975745
1514	Olfm1	56177	olfactomedin 1	3	0	0	6497	-0.05	0.3418	1.063	0.00306124	0.31741	0.0835175	1	0.0727049	0.0794666	0.999548	-0.0146384	0.68214	0.944901	-0.209399	0.000946557	0.0204703
1515	Lcat	16816	lecithin cholesterol acyltransferase	3	0	0	2925	-0.58	0.07232	0.8411	0.00306858	0.643731	0.0835256	1	-1.9982	0.000136727	1	0.203206	0.435903	1	0.0681654	0.863445	0.9742
1516	Tyro3	22174	TYRO3 protein tyrosine kinase 3	3	0	0	4036	-0.11	0.1408	1	0.00319345	0.537483	0.0863344	1	-0.0857179	0.19073	0.999548	-0.0162552	0.813058	0.973295	-0.216089	0.000348444	0.00953632
1517	Dcakd	68087	dephospho-CoA kinase domain containing	3	0	0	4531	0.1	0.1769	1.038	0.00319455	0.899615	0.0863344	1	0.00296272	0.965352	0.999548	0.084623	0.15455	0.677636	0.225254	0.000362327	0.00983207
1518	Cacna2d3	12294	calcium channel, voltage-dependent, alpha2/delta subunit 3	3	0	0	4017	-0.12	0.1395	1.002	0.00320092	0.584688	0.0863904	1	-0.0162962	0.836196	0.999548	-0.195463	0.000650132	0.026355	-0.13556	0.0996794	0.434962
1519	Stac	20840	src homology three (SH3) and cysteine rich domain	3	0	0	2032	0.51	0.03247	0.6688	0.00322268	0.0675294	0.086745	1	-0.278089	0.407222	1	0.959212	0.00498036	1	0.853002	0.0269419	0.211038
1520	Camkv	235604	CaM kinase-like vesicle-associated	3	0	0	5995	-0.07	0.2974	1.04	0.00323846	0.197594	0.0870532	1	0.0317273	0.582449	0.999548	-0.0344728	0.309369	0.819359	-0.209549	0.000305058	0.00860696
1521	Tmem176a	66058	transmembrane protein 176A	3	33.3333	0	2592	0.15	0.0557	0.7959	0.00327532	0.253844	0.0876922	1	-1.11163	0.0803316	1	0.435884	0.633173	1	1.1137	0.00109579	0.02281
1522	Slc7a1	11987	solute carrier family 7 (cationic amino acid transporter, y+ system), member 1	3	0	0	2897	-0.16	0.07087	0.8382	0.0032712	0.0574508	0.0876922	1	-0.17796	0.0492622	0.979338	-0.221081	0.00292767	0.0811738	-0.0908129	0.385862	0.791459
1523	Ndufv1	17995	NADH:ubiquinone oxidoreductase core subunit V1	3	0	0	4241	-0.09	0.1554	1.018	0.00337401	0.0998068	0.0895688	1	-0.0437884	0.46386	0.999548	-0.0927126	0.0227294	0.292989	-0.12917	0.0054823	0.0741247
1524	Arhgap21	71435	Rho GTPase activating protein 21	3	0	0	4278	-0.13	0.1581	1.02	0.00337129	0.428537	0.0895688	1	0.0395594	0.753927	0.999548	-0.20499	0.036619	0.371755	-0.23769	0.00209157	0.0367708
1525	2020-09-11	52398	septin 11	3	0	0	4556	-0.07	0.1788	1.021	0.00337659	0.115743	0.0895688	1	-0.0788474	0.0224039	0.769868	-0.0974761	0.00529893	0.120864	-0.0345214	0.48734	0.843727
1526	Sipa1l3	74206	signal-induced proliferation-associated 1 like 3	3	0	0	4384	0.05	0.1659	1.024	0.00336672	0.111014	0.0895688	1	0.186251	0.48061	0.999548	0.341767	0.0133182	1	-0.389423	0.00900634	0.102685
1527	Ggt7	207182	gamma-glutamyltransferase 7	3	0	0	4555	-0.1	0.1787	1.022	0.00341136	0.232627	0.0901344	1	-0.0255334	0.615016	0.999548	-0.0423349	0.296143	0.813508	-0.228142	0.00032167	0.00901593
1528	Tgfb3	21809	transforming growth factor, beta 3	3	0	0	1733	0.38	0.02261	0.5705	0.00345248	0.155198	0.0911011	1	0.293705	0.273401	1	0.148421	0.537398	1	0.695169	0.000404655	0.0107301
1529	Adhfe1	76187	alcohol dehydrogenase, iron containing, 1	3	0	0	4165	-0.15	0.15	1.011	0.00349039	0.26207	0.0919806	1	-0.148173	0.436067	0.999548	0.0711966	0.63994	1	-0.367743	0.000215927	0.00644804
1530	Atp6v1e1	11973	ATPase, H+ transporting, lysosomal V1 subunit E1	3	0	0	4725	-0.08	0.1918	1.026	0.00353709	0.274664	0.0929676	1	-0.0219526	0.650031	0.999548	-0.0922069	0.00767464	0.150372	-0.128485	0.012277	0.126254
1531	Smarce1	57376	SWI/SNF related, matrix associated, actin dependent regulator of chromatin, subfamily e, member 1	3	0	0	5801	-0.02	0.2805	1.043	0.00358087	0.0659736	0.0938731	1	0.6692	0.40407	1	-0.883577	0.260682	1	0.159712	0.000590304	0.0143282
1532	Osmr	18414	oncostatin M receptor	3	33.3333	0	2029	0.49	0.03239	0.6693	0.00362309	0.365345	0.0947328	1	-0.301945	0.714882	1	0.751926	0.239267	1	1.02102	0.000368788	0.00998619
1533	Sertad4	214791	SERTA domain containing 4	3	0	0	4392	0.19	0.1665	1.024	0.00366073	0.216004	0.0955074	1	0.126587	0.255171	0.999548	-0.0699371	0.600004	1	0.503243	0.000417274	0.011019
1534	Stip1	20867	stress-induced phosphoprotein 1	3	0	0	4995	-0.07	0.2131	1.032	0.00366222	0.919386	0.0955074	1	-0.00148053	0.972373	0.999548	-0.0944697	0.00892599	0.170859	-0.119556	0.00736435	0.0898127
1535	Acadl	11363	acyl-Coenzyme A dehydrogenase, long-chain	3	0	0	6573	0	0.3486	1.069	0.00368512	0.685054	0.0959802	1	-0.0181666	0.881539	0.999548	-0.212565	0.0200045	0.275639	0.226927	0.00365242	0.0552565
1536	Ppme1	72590	protein phosphatase methylesterase 1	3	0	0	6725	-0.04	0.3622	1.081	0.00371144	0.135002	0.0965406	1	0.0648502	0.0582311	0.999548	-0.0214003	0.512995	0.902892	-0.170371	0.0021751	0.0379781
1537	Myof	226101	myoferlin	3	33.3333	0	578.5	1.03	0.001566	0.2127	0.00373499	0.13395	0.0966873	1	0.504607	0.51166	1	0.956402	0.344032	1	1.63394	0.000372002	0.0100391
1538	Stambpl1	76630	STAM binding protein like 1	3	0	0	4366	0.16	0.1646	1.021	0.00373283	0.128623	0.0966873	1	-0.075817	0.504785	0.999548	0.261104	0.0191108	1	0.297405	0.00678312	0.0854139
1539	2010300C02Rik	72097	RIKEN cDNA 2010300C02 gene	3	0	0	4302	-0.15	0.1598	1.017	0.0037527	0.834357	0.0968778	1	-0.104787	0.5629	0.999548	0.00608589	0.941421	0.990944	-0.338548	0.00012429	0.00414764
1540	C1ql2	226359	complement component 1, q subcomponent-like 2	3	0	0	4007	0.2	0.1388	0.9997	0.0037676	0.173985	0.097122	1	-0.182432	0.558261	1	0.226361	0.286044	1	0.562015	0.000414471	0.0109676
1541	Msrb3	320183	methionine sulfoxide reductase B3	3	33.3333	0	5223	0.31	0.2317	1.052	0.0038227	0.608857	0.0980396	1	-0.158469	0.69558	1	-0.062438	0.847563	1	1.15583	0.000114288	0.00392665
1542	Cttnbp2	30785	cortactin binding protein 2	3	0	0	3117	0.2	0.0828	0.8712	0.00385605	0.262926	0.0986433	1	0.362348	0.00180896	0.269733	0.0506846	0.640636	0.934361	0.185094	0.058765	0.325993
1543	Rbak	57782	RB-associated KRAB zinc finger	3	0	0	3484	0.2	0.1044	0.939	0.00389074	0.484466	0.0992781	1	0.0360944	0.785394	0.999548	0.454446	0.000175422	1	0.0936984	0.499773	0.85293
1544	Mpped1	223726	metallophosphoesterase domain containing 1	3	0	0	5605	-0.07	0.2637	1.039	0.00389712	0.11537	0.0993147	1	-0.0717057	0.0387954	0.936841	0.0231844	0.486815	0.888389	-0.175724	0.00365322	0.0552565
1545	Mcoln3	171166	mucolipin 3	3	0	0	499.2	1.31	0.00106	0.1837	0.00393748	0.424965	0.100216	1	-0.438668	0.751826	1	2.28168	0.0688251	1	2.0912	0.0013504	1
1546	Rimbp2	231760	RIMS binding protein 2	3	0	0	4865	-0.16	0.2027	1.03	0.00395794	0.753849	0.10061	1	0.0181743	0.910112	0.999548	-0.0379699	0.752999	1	-0.445554	0.000102614	0.00357551
1547	Tle1	21885	transducin-like enhancer of split 1	3	0	0	3317	-0.15	0.09431	0.9314	0.0039722	0.201887	0.100801	1	-0.0420182	0.586637	0.999548	-0.103525	0.25986	0.785056	-0.316661	0.000463352	0.0119157
1548	Mt1	17748	metallothionein 1	3	0	0	2690	-0.3	0.06037	0.8055	0.00398525	0.167232	0.100921	1	0.177414	0.550943	1	-0.486566	0.0368101	1	-0.604277	0.00349704	0.0535278
1549	Tmem184c	234463	transmembrane protein 184C	3	0	0	7287	0.04	0.4131	1.114	0.00399671	0.667687	0.101084	1	-0.0880647	0.192437	0.999548	0.00857462	0.874026	0.979795	0.193959	0.000423154	0.0111054
1550	Atf4	11911	activating transcription factor 4	3	0	0	7487	0.03	0.4314	1.125	0.00402156	0.635256	0.101585	1	-0.0982491	0.0370366	0.927027	0.0124764	0.85964	0.978432	0.167397	0.00225256	0.0389054
1551	Ppp4r1	70351	protein phosphatase 4, regulatory subunit 1	3	0	0	5940	-0.03	0.2926	1.041	0.0040595	0.107329	0.102158	1	-0.178204	0.00149951	0.243979	-0.0456715	0.475233	0.883147	0.13997	0.10181	0.439459
1552	Lrrc4c	241568	leucine rich repeat containing 4C	3	0	0	4789	0.1	0.1968	1.043	0.00405124	0.330414	0.102158	1	0.209931	0.00158816	0.25102	0.124066	0.065914	0.489814	-0.0304618	0.691331	0.929014
1553	Wsb1	78889	WD repeat and SOCS box-containing 1	3	0	0	5587	0.1	0.2621	1.06	0.00405941	0.140509	0.102158	1	-0.147122	0.0962171	0.999548	0.0661363	0.519878	1	0.380914	0.00145038	0.027709
1554	Arhgap33	233071	Rho GTPase activating protein 33	3	0	0	8011	-0.04	0.4788	1.129	0.00412692	0.930948	0.103595	1	0.00290208	0.976432	0.999548	0.0989266	0.0413685	0.394622	-0.225301	0.00183295	0.0334192
1555	Camk2d	108058	calcium/calmodulin-dependent protein kinase II, delta	3	0	0	4205	-0.1	0.1528	1.013	0.00415637	0.846073	0.104075	1	-0.181046	0.00201614	0.278833	-0.00331688	0.945807	0.991028	-0.105447	0.0391692	0.259121
1556	Ssx2ip	99167	synovial sarcoma, X 2 interacting protein	3	0	0	5331	-0.09	0.2407	1.036	0.00416382	0.498749	0.104132	1	0.0196633	0.793038	0.999548	-0.0995796	0.0831472	0.533701	-0.175929	0.00113523	0.0233241
1557	Ppp1r1a	58200	protein phosphatase 1, regulatory inhibitor subunit 1A	3	0	0	4897	-0.1	0.2053	1.03	0.00419565	0.176427	0.104797	1	-0.097101	0.120751	0.999548	0.0283457	0.560861	0.918306	-0.238318	0.00111572	0.0230373
1558	Ajap1	230959	adherens junction associated protein 1	3	0	0	3365	-0.16	0.09716	0.9397	0.00423849	0.534904	0.105653	1	-0.0378172	0.811755	0.999548	-0.0854361	0.36094	1	-0.363793	0.000261147	0.00758572
1559	Tsc22d1	21807	TSC22 domain family, member 1	3	0	0	6562	0.04	0.3476	1.074	0.00424043	0.509301	0.105653	1	0.0702616	0.0237648	0.79101	0.0685513	0.00403395	0.0992115	-0.00782096	0.798592	0.957641
1560	Cdkn2b	12579	cyclin dependent kinase inhibitor 2B	3	0	0	3022	-0.06	0.0775	0.8647	0.0042669	0.075324	0.105965	1	-0.702005	0.0675426	1	-0.231578	0.422323	1	0.756031	0.00270458	0.0444098
1561	Shank3	58234	SH3 and multiple ankyrin repeat domains 3	3	0	0	4588	-0.14	0.1812	1.022	0.00426873	0.279189	0.105965	1	0.073258	0.653581	0.999548	-0.0934953	0.438672	1	-0.396178	0.000269223	0.00778494
1562	Dmxl2	235380	Dmx-like 2	3	0	0	3033	-0.17	0.0781	0.8661	0.00435254	0.487595	0.107514	1	-0.034451	0.787082	0.999548	-0.244887	0.0028442	0.0797107	-0.23295	0.0353176	0.244791
1563	Mdh2	17448	malate dehydrogenase 2, NAD (mitochondrial)	3	0	0	5102	-0.07	0.2218	1.031	0.00442678	0.204566	0.109045	1	-0.0237347	0.589221	0.999548	-0.0596556	0.0700287	0.500765	-0.126399	0.00195652	0.0350719
1564	2020-09-03	24050	septin 3	3	0	0	5472	-0.08	0.2524	1.041	0.00443078	0.984351	0.109045	1	0.000370639	0.994756	0.999548	-0.0785468	0.0641657	0.481079	-0.172615	0.0012662	0.025097
1565	Dagla	269060	diacylglycerol lipase, alpha	3	0	0	3582	-0.12	0.1106	0.978	0.00454565	0.373493	0.111194	1	-0.0366144	0.720158	0.999548	-0.125757	0.0431017	0.403106	-0.210064	0.00268739	0.0442424
1566	Gm21972		predicted gene 21972	3	0	0	4545	-0.08	0.178	1.024	0.00453987	0.0703592	0.111194	1	-0.0354238	0.412832	0.999548	-0.0717096	0.0370685	0.375023	-0.129484	0.00544241	0.0739995
1567	Mad2l1bp	66591	MAD2L1 binding protein	3	0	0	4988	0.16	0.2126	1.046	0.00454574	0.182539	0.111194	1	0.0689801	0.567264	0.999548	-0.145365	0.373469	1	0.54767	0.000393752	0.0105064
1568	Usp12	22217	ubiquitin specific peptidase 12	3	0	0	1862	-0.51	0.02664	0.6158	0.0045572	0.128486	0.111276	1	-1.29963	0.0414709	1	-0.527409	0.504605	1	0.307072	0.00399871	0.0590838
1569	Cfap52	71860	cilia and flagella associated protein 52	3	0	0	3765	0.21	0.1224	0.9785	0.00469313	0.6085	0.114243	1	-0.0150817	0.847397	0.999548	0.264074	0.00036239	0.0168773	0.385938	0.282573	0.709821
1570	Ssbp2	66970	single-stranded DNA binding protein 2	3	0	0	5678	0.06	0.2699	1.058	0.00472875	0.109517	0.114971	1	0.113492	0.00445137	0.400247	0.107414	0.0411277	0.394622	-0.040102	0.47844	0.839688
1571	Tmprss11f	243083	transmembrane protease, serine 11f	3	0	0	124.1	2.14	1.95e-05	0.04366	0.00476299	0.293453	0.115663	1	4.39849	0.000354428	1	0.421879	0.664528	1	1.61127	0.375224	1
1572	Tmem28	620592	transmembrane protein 28	3	0	0	2986	-0.33	0.07557	0.855	0.00479244	0.283574	0.116098	1	-0.52257	0.0251214	0.803304	0.0717693	0.656985	1	-0.552208	0.00539567	0.0735203
1573	Rtl6	223732	retrotransposon Gag like 6	3	0	0	8118	0	0.4884	1.121	0.00489595	0.125446	0.118321	1	0.0662442	0.500593	0.999548	0.237747	0.0303284	1	-0.312115	0.00602279	0.0781496
1574	Cp	12870	ceruloplasmin	3	0	0	6193	0.17	0.3147	1.062	0.00494842	0.517633	0.119302	1	-0.119143	0.535368	0.999548	-0.0466177	0.802923	1	0.663939	0.000215545	0.00644804
1575	Rgs16	19734	regulator of G-protein signaling 16	3	0	0	2125	0.49	0.03591	0.6811	0.00498945	0.27749	0.11986	1	-0.0994289	0.652252	0.999548	0.801851	0.0164936	1	0.770898	0.00870112	0.100279
1576	Aldh3b1	67689	aldehyde dehydrogenase 3 family, member B1	3	0	0	2661	-0.17	0.05897	0.7968	0.00500237	0.0859235	0.119884	1	0.734677	0.336395	1	-0.320632	0.44127	1	-0.928893	0.000632623	0.0151415
1577	Ppm1d	53892	protein phosphatase 1D magnesium-dependent, delta isoform	3	0	0	5102	0.11	0.2218	1.041	0.00502733	0.0677042	0.120339	1	-0.0562088	0.407573	0.999548	0.155152	0.0959051	0.561162	0.232474	0.00241729	0.0413593
1578	Abo	80908	ABO blood group (transferase A, alpha 1-3-N-acetylgalactosaminyltransferase, transferase B, alpha 1-3-galactosyltransferase)	3	0	0	2469	-0.38	0.0501	0.7535	0.0050715	0.826694	0.121252	1	-0.816007	0.00121898	0.217528	0.0162971	0.93853	1	-0.333333	0.0834912	0.398977
1579	Mapk8ip3	30957	mitogen-activated protein kinase 8 interacting protein 3	3	0	0	5144	-0.09	0.2252	1.032	0.00518927	0.882109	0.123773	1	0.00633494	0.959049	0.999548	-0.125048	0.00588291	0.129341	-0.157179	0.0174186	0.160509
1580	Tsku	244152	tsukushi, small leucine rich proteoglycan	3	0	0	4006	0.19	0.1388	1	0.00522693	0.878298	0.124523	1	0.0535909	0.629747	0.999548	0.00581595	0.957666	1	0.495575	0.000164422	0.00512556
1581	Kdm3a	104263	lysine (K)-specific demethylase 3A	3	0	0	5319	0.11	0.2396	1.056	0.00523428	0.233451	0.124551	1	0.0842141	0.32395	0.999548	-0.0413869	0.615742	0.931369	0.288778	0.00049799	0.0125292
1582	Cbfb	12400	core binding factor beta	3	0	0	4941	0.13	0.2088	1.044	0.0052725	0.746515	0.125164	1	-0.00796984	0.907151	0.999548	0.0972701	0.183682	0.710784	0.29541	0.000601551	0.0145065
1583	Tlcd1	68385	TLC domain containing 1	3	0	0	2730	-0.2	0.06235	0.8099	0.005333	0.105926	0.126154	1	-0.170799	0.18126	0.999548	-0.0627009	0.473152	1	-0.365835	0.0011854	0.0238968
1584	Tars	110960	threonyl-tRNA synthetase	3	0	0	6044	-0.04	0.3017	1.045	0.00534973	0.160301	0.126252	1	-0.187806	0.000993262	0.1884	-0.0284409	0.543224	0.913037	0.0980497	0.189153	0.606514
1585	Cnih2	12794	cornichon family AMPA receptor auxiliary protein 2	3	0	0	6095	-0.07	0.3062	1.047	0.00534599	0.255312	0.126252	1	0.0196852	0.634391	0.999548	-0.0369881	0.289572	0.8073	-0.183327	0.000555091	0.0135912
1586	Cep104	230967	centrosomal protein 104	3	0	0	5387	-0.1	0.2453	1.038	0.00536521	0.437863	0.126469	1	0.0288077	0.759357	0.999548	-0.04613	0.608535	0.927563	-0.278298	0.000221657	0.00658836
1587	Lingo1	235402	leucine rich repeat and Ig domain containing 1	3	0	0	4381	-0.09	0.1657	1.02	0.00548851	0.870764	0.129073	1	-0.0737636	0.122451	0.999548	-0.00216891	0.95492	0.991764	-0.197601	0.000901027	0.0196569
1588	Map2k1	26395	mitogen-activated protein kinase kinase 1	3	0	0	5699	-0.07	0.2717	1.042	0.00556453	0.215952	0.130403	1	0.0310309	0.599956	0.999548	-0.0855987	0.0436889	0.405053	-0.159059	0.00408884	0.0600683
1589	Zdhhc13	243983	zinc finger, DHHC domain containing 13	3	0	0	5025	0.09	0.2156	1.046	0.00557941	0.549872	0.1306	1	0.0218513	0.741934	0.999548	0.0148999	0.819258	0.974028	0.236402	0.000176907	0.00540921
1590	Acvr1	11477	activin A receptor, type 1	3	0	0	7714	-0.03	0.4519	1.127	0.00559433	0.81954	0.130797	1	0.179276	0.0619786	0.999548	0.00847787	0.935815	1	-0.287881	0.00186012	0.0338664
1591	Zfp57	22715	zinc finger protein 57	3	0	0	2421	0.3	0.04799	0.7516	0.0056211	0.078152	0.130966	1	0.0780487	0.427543	0.999548	0.265463	0.0497022	1	0.552988	0.00510733	0.0706458
1592	Rell1	100532	RELT-like 1	3	0	0	1227	0.52	0.01008	0.4087	0.00564036	0.12207	0.131033	1	0.163397	0.496063	0.999548	0.639581	0.0387768	1	0.770067	0.00566614	0.0755939
1593	Cnot6	104625	CCR4-NOT transcription complex, subunit 6	3	0	0	4253	0.16	0.1563	1.019	0.00564354	0.649348	0.131033	1	-0.0133758	0.865949	0.999548	0.243715	0.00476408	0.113374	0.244644	0.026438	0.209459
1594	Otulin	432940	OTU deubiquitinase with linear linkage specificity	3	0	0	5190	-0.02	0.229	1.033	0.0056943	0.184852	0.131907	1	-0.304726	0.0218106	0.762725	-0.0725687	0.56965	1	0.330375	0.00887687	0.101937
1595	Zfp804a	241514	zinc finger protein 804A	3	0	0	2128	0.31	0.03603	0.6784	0.00573284	0.0697118	0.132361	1	0.449453	0.00414782	0.387406	0.301226	0.0651514	1	0.179608	0.411562	0.806052
1596	Tenm2	23964	teneurin transmembrane protein 2	3	0	0	4866	-0.1	0.2029	1.03	0.00572597	0.232115	0.132361	1	0.0934464	0.614565	0.999548	-0.112079	0.0953609	0.560714	-0.278763	0.00189493	0.0343047
1597	Mark2	13728	MAP/microtubule affinity regulating kinase 2	3	0	0	8717	-0.01	0.5419	1.075	0.00574873	0.189779	0.132557	1	0.0478397	0.574667	0.999548	0.111088	0.0766414	0.517814	-0.20017	0.00253393	0.042516
1598	Gng12	14701	guanine nucleotide binding protein (G protein), gamma 12	3	0	0	5234	0.12	0.2326	1.051	0.00580488	0.0974127	0.133393	1	-0.127858	0.34216	0.999548	0.0840236	0.460121	1	0.414451	0.000717505	0.0165831
1599	Cdkl2	53886	cyclin-dependent kinase-like 2 (CDC2-related kinase)	3	0	0	6305	-0.05	0.3246	1.053	0.00579901	0.224184	0.133393	1	0.0776045	0.129841	0.999548	-0.0252676	0.607484	0.926275	-0.215178	0.00143031	0.0274076
1600	Sult4a1	29859	sulfotransferase family 4A, member 1	3	0	0	5458	-0.06	0.2512	1.04	0.00588123	0.944623	0.134605	1	-0.000868787	0.981189	0.999548	-0.0524501	0.0355604	0.368576	-0.125992	0.00329056	0.0512261
1601	Plppr4	229791	phospholipid phosphatase related 4	3	0	0	4792	0.09	0.197	1.044	0.00588439	0.809275	0.134605	1	0.210825	0.000684027	0.140149	0.0447513	0.180236	0.706244	0.00556905	0.931892	0.986253
1602	Cacnb3	12297	calcium channel, voltage-dependent, beta 3 subunit	3	0	0	7279	-0.08	0.4125	1.114	0.0058817	0.79641	0.134605	1	0.0217833	0.747798	0.999548	0.00346236	0.926927	0.990632	-0.257923	0.000165654	0.00513889
1603	Cep170b	217882	centrosomal protein 170B	3	0	0	5085	-0.1	0.2204	1.031	0.00589729	0.94193	0.134746	1	0.00302679	0.980256	0.999548	-0.0834967	0.0693294	0.49941	-0.219699	0.00169514	0.0316748
1604	Cd38	12494	CD38 antigen	3	0	0	847.4	-0.72	0.004114	0.3362	0.00594921	0.180754	0.135731	1	-0.284602	0.565409	1	-1.0483	0.00500349	1	-0.817984	0.0411687	0.26521
1605	Cds1	74596	CDP-diacylglycerol synthase 1	3	0	0	5485	-0.08	0.2535	1.041	0.00595386	0.133492	0.135731	1	0.0874196	0.290026	0.999548	-0.264201	0.000786508	0.0298264	-0.066003	0.511075	0.857807
1606	Tut1	70044	terminal uridylyl transferase 1, U6 snRNA-specific	3	0	0	4510	0.15	0.1753	1.037	0.0059612	0.127939	0.135744	1	0.341488	0.00291563	0.322432	-0.068364	0.503889	1	0.176279	0.0794738	0.388582
1607	Gpr160	71862	G protein-coupled receptor 160	3	0	0	1443	0.73	0.01478	0.4856	0.00598871	0.0949694	0.135755	1	-0.304834	0.456241	1	1.09029	0.0806447	1	1.41228	0.00319162	0.0501131
1608	Nid2	18074	nidogen 2	3	0	0	2762	0.38	0.06396	0.8206	0.00597757	0.137519	0.135755	1	-0.149203	0.516164	0.999548	0.421894	0.0157911	1	0.86141	0.0143739	0.140884
1609	Mgmt	17314	O-6-methylguanine-DNA methyltransferase	3	0	0	3172	-0.26	0.08585	0.8991	0.00597914	0.952689	0.135755	1	-0.412687	0.0200123	0.730747	0.00285914	0.983974	1	-0.381313	0.00595161	0.0776199
1610	Arhgef3	71704	Rho guanine nucleotide exchange factor (GEF) 3	3	0	0	4886	0.14	0.2044	1.045	0.0059884	0.336467	0.135755	1	-0.0590687	0.695527	0.999548	0.111264	0.31396	1	0.381801	0.00053773	0.0132649
1611	Tspan17	74257	tetraspanin 17	3	0	0	5498	-0.09	0.2546	1.041	0.00601092	0.110977	0.135989	1	0.0410468	0.480556	0.999548	-0.0554744	0.272391	0.798559	-0.245548	0.000901254	0.0196569
1612	Atp1b2	11932	ATPase, Na+/K+ transporting, beta 2 polypeptide	3	0	0	4414	0.11	0.1681	1.025	0.00615308	0.424097	0.138855	1	0.0728681	0.358399	0.999548	0.0160233	0.751314	0.958646	0.244608	0.000451071	0.0117178
1613	Arhgdib	11857	Rho, GDP dissociation inhibitor (GDI) beta	3	0	0	805.5	0.91	0.003629	0.2754	0.00616759	0.114231	0.139027	1	0.0954231	0.485208	0.999548	0.515856	0.0554379	1	2.12332	0.0045287	1
1614	Lrrc8c	100604	leucine rich repeat containing 8 family, member C	3	0	0	5533	0.13	0.2576	1.056	0.00621255	0.87091	0.13949	1	0.0172831	0.905508	0.999548	-0.00601059	0.954973	1	0.391735	0.000142153	0.00456498
1615	Ank2	109676	ankyrin 2, brain	3	0	0	2736	-0.18	0.06265	0.8106	0.0062398	0.40681	0.13987	1	-0.0726167	0.740964	0.999548	-0.218253	0.0498068	0.436983	-0.264092	0.00334907	0.0517587
1616	Cyb561	13056	cytochrome b-561	3	0	0	3918	-0.12	0.1327	1	0.00635564	0.571589	0.14215	1	-0.0180684	0.829904	0.999548	-0.118833	0.0695135	0.500123	-0.225629	0.00219219	0.0381721
1617	Tpcn1	252972	two pore channel 1	3	0	0	3290	-0.15	0.09274	0.9259	0.00641537	0.316272	0.143167	1	-0.190052	0.0416156	0.95167	-0.0282967	0.681324	0.944756	-0.222914	0.00451267	0.0640138
1618	Pcsk6	18553	proprotein convertase subtilisin/kexin type 6	3	0	0	3819	0.23	0.126	0.9851	0.00641259	0.303104	0.143167	1	0.211483	0.235805	0.999548	-0.0503168	0.671734	1	0.525644	0.000807345	0.0180712
1619	Shpk	74637	sedoheptulokinase	3	0	0	1972	-0.29	0.03035	0.6344	0.00646511	0.30795	0.143323	1	-0.186754	0.389888	0.999548	-0.0906877	0.675295	1	-0.58304	0.000490679	0.0123696
1620	Eepd1	67484	endonuclease/exonuclease/phosphatase family domain containing 1	3	0	0	3062	0.17	0.07972	0.8586	0.0064367	0.117649	0.143323	1	0.248283	0.00723679	0.494118	0.181432	0.0362327	0.370956	0.0778418	0.49	0.845738
1621	Kdm4b	193796	lysine (K)-specific demethylase 4B	3	0	0	4550	-0.09	0.1783	1.022	0.00645057	0.523921	0.143323	1	-0.0205411	0.806161	0.999548	-0.0748635	0.201469	0.733289	-0.17766	0.000793192	0.0178482
1622	Arhgap20	244867	Rho GTPase activating protein 20	3	0	0	5082	0.12	0.2201	1.044	0.00645819	0.280998	0.143323	1	0.360407	0.00031688	0.0779103	0.051559	0.621612	0.931369	-0.0522451	0.65499	0.91757
1623	Syde2	214804	synapse defective 1, Rho GTPase, homolog 2 (C. elegans)	3	0	0	1378	-0.43	0.01326	0.483	0.00648309	0.0734633	0.143563	1	-0.191199	0.418816	0.999548	-0.587278	0.0067204	1	-0.518385	0.0460593	0.28563
1624	Adcy8	11514	adenylate cyclase 8	3	0	0	2918	0.2	0.07193	0.8409	0.00652675	0.158574	0.144213	1	0.359965	0.00395382	0.387406	0.173475	0.0610868	1	0.0718318	0.541266	0.874464
1625	Snap25	20614	synaptosomal-associated protein 25	3	0	0	3870	-0.12	0.1294	0.9941	0.00653756	0.540918	0.144293	1	-0.017202	0.814787	0.999548	-0.15265	0.078302	0.520332	-0.192532	0.00205332	0.0363986
1626	Shank2	210274	SH3 and multiple ankyrin repeat domains 2	3	0	0	701.8	-0.66	0.002573	0.2738	0.00655728	0.354106	0.144569	1	1.77163	0.707475	1	-3.43166	0.370565	1	-0.313949	0.000501568	0.0125697
1627	Camk1d	227541	calcium/calmodulin-dependent protein kinase ID	3	0	0	2663	-0.2	0.0591	0.798	0.00658225	0.143716	0.144961	1	-0.234376	0.210468	0.999548	-0.0741869	0.523804	0.90507	-0.281418	0.00119843	0.0240835
1628	Aatk	11302	apoptosis-associated tyrosine kinase	3	0	0	3492	-0.12	0.105	0.9641	0.0065929	0.093634	0.144987	1	-0.0615593	0.454093	0.999548	-0.134149	0.0187598	0.268211	-0.174251	0.0155408	0.148295
1629	Zmiz2	52915	zinc finger, MIZ-type containing 2	3	0	0	5861	-0.06	0.2857	1.043	0.00664816	0.222637	0.145933	1	0.0561372	0.606083	0.999548	-0.0732674	0.126671	0.635354	-0.173694	0.00174247	0.0321364
1630	Akt1s1	67605	AKT1 substrate 1 (proline-rich)	3	0	0	3996	-0.13	0.1381	1.001	0.00673444	0.962956	0.147344	1	-0.00117323	0.987496	0.999548	-0.100838	0.140848	0.653437	-0.276516	0.000977427	0.0209958
1631	Fam120a	218236	family with sequence similarity 120, member A	3	0	0	4245	-0.11	0.1557	1.017	0.00674489	0.638055	0.147413	1	-0.0489132	0.658801	0.999548	-0.0144208	0.8609	0.978432	-0.2532	0.000240163	0.00705637
1632	Arl6ip5	65106	ADP-ribosylation factor-like 6 interacting protein 5	3	0	0	4847	0.09	0.2014	1.044	0.00676592	0.429951	0.147712	1	0.018951	0.754756	0.999548	0.0568907	0.218203	0.756359	0.182522	0.000830301	0.0184854
1633	Sema3a	20346	sema domain, immunoglobulin domain (Ig), short basic domain, secreted, (semaphorin) 3A	3	0	0	3824	0.24	0.1263	0.9849	0.00682559	0.206672	0.148691	1	-0.0755608	0.591236	0.999548	0.506532	0.00185301	1	0.298018	0.126192	0.490231
1634	Flnb	286940	filamin, beta	3	0	0	7209	-0.02	0.4061	1.111	0.00684734	0.402372	0.149004	1	0.0713295	0.73826	0.999548	-0.514599	0.0116022	1	0.377134	0.016205	0.152966
1635	Pgm2l1	70974	phosphoglucomutase 2-like 1	3	0	0	8030	-0.04	0.4806	1.127	0.00698392	0.648857	0.151321	1	0.096185	0.0948304	0.999548	0.00768703	0.865731	0.978632	-0.223248	0.00173299	0.0320732
1636	Tspan2	70747	tetraspanin 2	3	0	0	3759	0.15	0.122	0.9785	0.007054	0.404287	0.152488	1	0.0196204	0.739429	0.999548	0.14377	0.00626967	0.135989	0.271136	0.0310751	0.227344
1637	Stum	381310	mechanosensory transduction mediator	3	0	0	5180	-0.11	0.2282	1.032	0.00706053	0.322403	0.152488	1	-0.0413103	0.685699	0.999548	0.0476745	0.601348	1	-0.348898	0.000349782	0.00955249
1638	C1qtnf4	67445	C1q and tumor necrosis factor related protein 4	3	0	0	5484	0.08	0.2535	1.056	0.00705943	0.381458	0.152488	1	-0.0263817	0.725241	0.999548	0.169602	0.00166121	0.0516647	0.110543	0.119692	0.479436
1639	Nmb	68039	neuromedin B	3	0	0	433.4	-1.12	0.0007237	0.194	0.00728836	0.809933	0.156903	1	-0.855067	0.12237	1	-0.0407272	0.932144	1	-2.47359	0.00131575	1
1640	Gabbr1	54393	gamma-aminobutyric acid (GABA) B receptor, 1	3	0	0	4655	-0.08	0.1864	1.026	0.00740692	0.676616	0.159114	1	-0.00570253	0.877905	0.999548	-0.11147	0.0120622	0.207314	-0.135907	0.0144623	0.141642
1641	Scamp2	24044	secretory carrier membrane protein 2	3	0	0	6518	0	0.3437	1.064	0.00742158	0.898125	0.159259	1	-0.201265	0.0108839	0.602156	-0.0031829	0.964819	0.993815	0.203211	0.0146204	0.142971
1642	Magee1	107528	melanoma antigen, family E, 1	3	0	0	6840	-0.05	0.3727	1.091	0.00743288	0.300715	0.159332	1	-0.0228873	0.669964	0.999548	0.0359488	0.388624	0.855664	-0.165719	0.000590794	0.0143282
1643	Dlgap3	242667	DLG associated protein 3	3	0	0	4990	-0.13	0.2128	1.032	0.00747279	0.412824	0.160016	1	-0.0401225	0.714089	0.999548	0.0256719	0.744597	0.957599	-0.378679	0.000291246	0.00830896
1644	Xpot	73192	exportin, tRNA (nuclear export receptor for tRNAs)	3	0	0	4892	-0.09	0.2049	1.032	0.00748985	0.475815	0.160211	1	-0.0874682	0.175428	0.999548	-0.203087	0.00113396	0.0392083	0.0224484	0.780691	0.954222
1645	Celsr2	53883	cadherin, EGF LAG seven-pass G-type receptor 2	3	0	0	6369	-0.03	0.3303	1.053	0.00753932	0.0948033	0.161098	1	0.168264	0.298131	0.999548	-0.0415884	0.455975	0.878264	-0.201639	0.0011519	0.0235182
1646	Ing4	28019	inhibitor of growth family, member 4	3	0	0	7633	0.08	0.4446	1.132	0.00761424	0.9798	0.162354	1	-0.00742364	0.922562	0.999548	-0.000544634	0.993221	0.997702	0.235607	0.000173024	0.00533001
1647	Plekhg5	269608	pleckstrin homology domain containing, family G (with RhoGef domain) member 5	3	0	0	3914	-0.16	0.1324	1	0.00764839	0.103089	0.162909	1	-0.211041	0.242042	0.999548	0.107126	0.46889	1	-0.38605	0.00140484	0.027041
1648	Oaf	102644	out at first homolog	3	0	0	2645	-0.19	0.05821	0.7913	0.00778219	0.0723235	0.165409	1	-0.195784	0.0867979	0.999548	-0.0821379	0.416639	1	-0.305951	0.0045058	0.0639874
1649	Strip1	229707	striatin interacting protein 1	3	0	0	4742	-0.08	0.1931	1.026	0.00784416	0.0968302	0.16655	1	-0.0279546	0.459202	0.999548	-0.135783	0.00383116	0.097067	-0.0702263	0.0935477	0.422485
1650	Lrrc73	224813	leucine rich repeat containing 73	3	0	0	3627	0.13	0.1134	0.964	0.00785274	0.414408	0.166556	1	0.1487	0.0235031	0.790174	0.201973	0.00940508	0.175709	0.0291496	0.745549	0.944385
1651	Rab15	104886	RAB15, member RAS oncogene family	3	0	0	7035	-0.09	0.3903	1.103	0.00795441	0.713782	0.16818	1	0.00711243	0.893693	0.999548	0.0190538	0.669679	0.941911	-0.297152	0.000279851	0.00801966
1652	Matn4	17183	matrilin 4	3	0	0	2305	0.32	0.04305	0.7165	0.00807615	0.0674089	0.170039	1	0.0912899	0.406979	0.999548	0.277969	0.00380025	1	0.583901	0.110379	0.459121
1653	Paqr7	71904	progestin and adipoQ receptor family member VII	3	0	0	4334	-0.13	0.1622	1.017	0.00814333	0.283377	0.171095	1	0.0493439	0.656833	0.999548	-0.215129	0.0224089	1	-0.225562	0.0117198	0.122678
1654	Slc22a23	73102	solute carrier family 22, member 23	3	0	0	5685	0.08	0.2706	1.057	0.00818187	0.503794	0.171546	1	-0.0181253	0.795703	0.999548	0.0817359	0.180564	0.706244	0.190471	0.00120779	0.0242335
1655	Etv3	27049	ets variant 3	3	0	0	3052	0.29	0.07916	0.8567	0.00820353	0.0831423	0.171821	1	-0.163174	0.436456	0.999548	0.407433	0.0418004	1	0.630428	0.00954325	0.10634
1656	Snx1	56440	sorting nexin 1	3	0	0	3768	0.13	0.1226	0.979	0.00823648	0.324402	0.172153	1	0.0336842	0.687113	0.999548	0.160192	0.043059	0.403106	0.205804	0.00591447	0.0774676
1657	Ewsr1	14030	Ewing sarcoma breakpoint region 1	3	0	0	7555	-0.06	0.4375	1.123	0.00823145	0.114711	0.172153	1	0.0582159	0.485886	0.999548	0.110827	0.42096	0.867158	-0.360991	0.000854866	0.0189032
1658	Trappc11	320714	trafficking protein particle complex 11	3	0	0	4157	-0.1	0.1494	1.01	0.00826301	0.319954	0.172513	1	-0.0292388	0.683958	0.999548	-0.118699	0.0452319	0.413489	-0.163781	0.00567924	0.0756896
1659	Ddah1	69219	dimethylarginine dimethylaminohydrolase 1	3	0	0	6712	0.06	0.3611	1.081	0.00827086	0.30769	0.172513	1	0.028457	0.572695	0.999548	-0.0206352	0.675105	0.943384	0.1579	0.000454976	0.0117714
1660	Taf5l	102162	TATA-box binding protein associated factor 5 like	3	0	0	6809	0.05	0.3698	1.086	0.00829201	0.46359	0.172775	1	-0.129425	0.13146	0.999548	0.0207568	0.773947	0.963263	0.253924	0.0017345	0.0320732
1661	Hpca	15444	hippocalcin	3	0	0	5242	-0.09	0.2332	1.032	0.00832092	0.36529	0.173018	1	0.0366598	0.714846	0.999548	-0.0983084	0.0926382	0.553941	-0.20077	0.00267657	0.0442008
1662	Nfatc2	18019	nuclear factor of activated T cells, cytoplasmic, calcineurin dependent 2	3	0	0	1192	-0.52	0.009406	0.4398	0.00838544	0.0769301	0.173857	1	-0.503568	0.425303	1	-0.646463	0.0176174	1	-0.399879	0.023887	0.19788
1663	Porcn	53627	porcupine O-acyltransferase	3	0	0	5174	-0.09	0.2277	1.032	0.00838752	0.0689704	0.173857	1	0.0789743	0.410098	0.999548	-0.212238	0.00576029	0.129233	-0.122621	0.075789	0.377498
1664	Litaf	56722	LPS-induced TN factor	3	0	0	5191	0.13	0.2291	1.048	0.00839585	0.87888	0.173857	1	-0.0049536	0.957877	0.999548	0.0561798	0.427382	0.870462	0.341846	0.000437879	0.0114448
1665	Grk2	110355	G protein-coupled receptor kinase 2	3	0	0	5135	-0.09	0.2245	1.03	0.00843301	0.349454	0.174447	1	-0.0880746	0.124038	0.999548	0.0223543	0.704363	0.94983	-0.20942	0.00206322	0.0365212
1666	Medag	70717	mesenteric estrogen dependent adipogenesis	3	0	33.3333	2333	-0.38	0.04421	0.7192	0.00845811	0.0793321	0.174762	1	-0.466279	0.429684	1	0.348731	0.300881	1	-1.03374	0.00139951	0.0269791
1667	Klhl42	232539	kelch-like 42	3	0	0	2471	-0.21	0.0502	0.7538	0.00846562	0.0679893	0.174762	1	-0.0904458	0.408144	0.999548	-0.237835	0.0810275	1	-0.313924	0.00547721	0.0741247
1668	Ninj1	18081	ninjurin 1	3	0	0	4211	0.12	0.1532	1.016	0.00858147	0.358333	0.176972	1	0.0767349	0.34943	0.999548	0.030131	0.710279	0.95119	0.24972	0.00074242	0.0170357
1669	Tesc	57816	tescalcin	3	0	0	2523	-0.23	0.05254	0.7683	0.00861816	0.251515	0.177177	1	-0.134887	0.63123	1	-0.0994237	0.569675	1	-0.441084	0.000515179	0.0128353
1670	Nr2f6	13864	nuclear receptor subfamily 2, group F, member 6	3	0	0	3646	-0.13	0.1147	0.9848	0.00863568	0.126917	0.177177	1	-0.0592544	0.495562	0.999548	-0.0587563	0.502543	0.898676	-0.274883	0.000745783	0.0170822
1671	Mprip	26936	myosin phosphatase Rho interacting protein	3	0	0	4473	-0.09	0.1725	1.023	0.00863582	0.492656	0.177177	1	-0.0258399	0.789795	0.999548	-0.0960686	0.0233805	0.298658	-0.152359	0.0100583	0.11044
1672	Igfbp7	29817	insulin-like growth factor binding protein 7	3	0	0	4416	0.16	0.1683	1.025	0.00863854	0.0691854	0.177177	1	-0.139043	0.410524	0.999548	0.173446	0.152004	1	0.454371	0.00297765	0.0476909
1673	Prickle1	106042	prickle planar cell polarity protein 1	3	0	0	3444	0.16	0.102	0.9308	0.00867061	0.145255	0.177536	1	0.181182	0.0316994	0.900598	0.0456686	0.525666	0.90507	0.239539	0.011203	0.11972
1674	Aldoa	11674	aldolase A, fructose-bisphosphate	3	0	0	4981	-0.07	0.212	1.032	0.00868421	0.121733	0.177633	1	-0.0278185	0.495606	0.999548	-0.0622919	0.0493361	0.435257	-0.129614	0.00764978	0.0920486
1675	Snph	241727	syntaphilin	3	0	0	4383	-0.1	0.1658	1.02	0.00870458	0.760446	0.177869	1	-0.0144269	0.912759	0.999548	-0.107805	0.0701833	0.501094	-0.164487	0.00292849	0.0470805
1676	Abcb4	18670	ATP-binding cassette, sub-family B (MDR/TAP), member 4	3	0	0	5594	0.1	0.2628	1.06	0.00874716	0.331301	0.178557	1	-0.163067	0.319602	0.999548	0.0641081	0.691949	1	0.391608	0.000853532	0.0189032
1677	Ccl2	20296	chemokine (C-C motif) ligand 2	3	0	0	179.5	1.63	5.9e-05	0.06976	0.00878467	0.650764	0.178768	1	0.543032	0.866579	1	2.92928	0.0568907	1	1.40778	0.00384943	0.0574762
1678	Rassf1	56289	Ras association (RalGDS/AF-6) domain family member 1	3	0	0	2825	0.25	0.06714	0.8282	0.00878889	0.229072	0.178768	1	0.0692766	0.611868	0.999548	0.149896	0.347095	1	0.531481	0.000894136	0.019602
1679	Tln2	70549	talin 2	3	0	0	3933	-0.16	0.1337	0.9989	0.00879302	0.816709	0.178768	1	0.0177996	0.934736	0.999548	-0.216306	0.0306043	0.343529	-0.290012	0.00664195	0.0840137
1680	Abcf3	27406	ATP-binding cassette, sub-family F (GCN20), member 3	3	0	0	5723	-0.07	0.2738	1.042	0.0088869	0.0581704	0.180494	1	0.0666872	0.387466	0.999548	-0.0774988	0.200373	0.732457	-0.187384	0.00248033	0.0418229
1681	Pxdc1	66895	PX domain containing 1	3	0	0	8223	0.06	0.4979	1.115	0.00894476	0.225372	0.181486	1	-0.125062	0.354615	0.999548	-0.0550352	0.608555	1	0.354872	0.000899664	0.0196569
1682	Clptm1	56457	cleft lip and palate associated transmembrane protein 1	3	0	0	6597	-0.05	0.3508	1.072	0.0089889	0.560369	0.181831	1	0.00712269	0.824438	0.999548	-0.0987081	0.0012081	0.0405782	-0.0436219	0.196144	0.615495
1683	Tnfsf9	21950	tumor necrosis factor (ligand) superfamily, member 9	3	0	0	560.9	1.05	0.001444	0.2059	0.00903974	0.626333	0.182167	1	0.196883	0.855595	1	1.85377	0.0376798	1	1.09921	0.00610305	0.0791106
1684	Sbno2	216161	strawberry notch 2	3	0	0	4010	0.2	0.1391	0.999	0.0090363	0.631428	0.182167	1	-0.0311958	0.857909	0.999548	0.421562	0.00242684	1	0.220928	0.0944568	0.423166
1685	Lancl1	14768	LanC (bacterial lantibiotic synthetase component C)-like 1	3	0	0	5072	-0.07	0.2194	1.03	0.00904175	0.788445	0.182167	1	-0.00488868	0.923826	0.999548	-0.116347	0.00233919	0.0676404	-0.0817547	0.091073	0.416907
1686	Slc25a11	67863	solute carrier family 25 (mitochondrial carrier oxoglutarate carrier), member 11	3	0	0	5747	-0.07	0.2758	1.042	0.0090184	0.77668	0.182167	1	0.00637311	0.919208	0.999548	-0.101518	0.0158758	0.239891	-0.116701	0.0134425	0.134613
1687	Sh3bgr	50795	SH3-binding domain glutamic acid-rich protein	3	0	33.3333	714.3	-0.73	0.002691	0.2789	0.00906706	0.0889759	0.18243	1	-0.662892	0.267087	1	-0.35629	0.446434	1	-1.18533	0.00165641	0.0310419
1688	Tipin	66131	timeless interacting protein	3	0	0	4160	-0.05	0.1496	1.01	0.00907294	0.0574942	0.18243	1	-0.408001	0.0375373	0.927037	-0.167238	0.385959	1	0.412781	0.0136436	0.136021
1689	Spindoc	68229	spindlin interactor and repressor of chromatin binding	3	0	0	5455	0.12	0.251	1.057	0.0092884	0.626995	0.185464	1	-0.0169787	0.855897	0.999548	0.0400013	0.701235	1	0.349243	0.000339247	0.0093851
1690	Ybx3	56449	Y box protein 3	3	0	0	5332	-0.06	0.2407	1.036	0.00941776	0.134479	0.187704	1	-0.166843	0.002265	0.291394	-0.0830851	0.178554	0.703919	0.0716337	0.512332	0.858309
1691	Zbtb7a	16969	zinc finger and BTB domain containing 7a	3	0	0	8117	-0.02	0.4884	1.121	0.00941929	0.23315	0.187704	1	0.0717818	0.615477	0.999548	0.162398	0.204027	1	-0.300588	0.00165036	0.030974
1692	Pir	69656	pirin	3	0	0	4681	-0.1	0.1884	1.027	0.00948275	0.144122	0.188782	1	-0.107868	0.524296	0.999548	0.163726	0.244029	1	-0.356008	0.0016336	0.0307045
1693	Vwa5a	67776	von Willebrand factor A domain containing 5A	3	0	0	4737	0.12	0.1927	1.043	0.00953245	0.467596	0.189583	1	0.127105	0.77617	0.999548	-0.205551	0.368736	1	0.431268	0.000735124	0.0168986
1694	Fam102a	98952	family with sequence similarity 102, member A	3	0	0	5894	0.06	0.2885	1.057	0.00959604	0.233695	0.190471	1	0.0388773	0.615956	0.999548	0.199706	0.000819407	0.0305608	-0.0587202	0.420373	0.810742
1695	Snta1	20648	syntrophin, acidic 1	3	0	0	3565	-0.12	0.1095	0.9737	0.00974865	0.0993958	0.192929	1	-0.0675633	0.463222	0.999548	-0.190609	0.00617759	0.134988	-0.105541	0.0756385	0.376895
1696	Pakap	677884	paralemmin A kinase anchor protein	3	0	0	1757	-0.62	0.02333	0.5975	0.00985564	0.0589266	0.194472	1	-0.535799	0.296091	1	-1.47927	0.00190467	1	0.14863	0.389138	0.792455
1697	Gls2	216456	glutaminase 2 (liver, mitochondrial)	3	0	0	2145	0.3	0.03669	0.6831	0.0099931	0.0590765	0.196606	1	0.171327	0.389468	0.999548	0.269784	0.104521	1	0.456956	0.00548643	0.0741247
1698	Kalrn	545156	kalirin, RhoGEF kinase	3	0	0	5085	-0.14	0.2204	1.031	0.0100102	0.634223	0.196628	1	0.0441384	0.859173	0.999548	-0.0324403	0.742217	0.956659	-0.437418	0.000350986	0.00956493
1699	Akap12	83397	A kinase (PRKA) anchor protein (gravin) 12	3	0	0	2947	-0.18	0.07349	0.8439	0.0100399	0.648675	0.196948	1	-0.220559	0.230672	0.999548	-0.30337	0.0011251	0.0391569	-0.0244004	0.86565	0.974266
1700	Tubb4a	22153	tubulin, beta 4A class IVA	3	0	0	4963	-0.08	0.2106	1.033	0.0100611	0.4972	0.197171	1	-0.0175242	0.792216	0.999548	-0.0362731	0.390944	0.855664	-0.186527	0.000727332	0.0167798
1701	Cabp1	29867	calcium binding protein 1	3	0	0	5443	-0.13	0.25	1.041	0.010091	0.830004	0.197566	1	0.0618891	0.707193	0.999548	-0.0101472	0.939781	1	-0.434049	0.000340221	0.00939172
1702	Ifitm3	66141	interferon induced transmembrane protein 3	3	33.3333	0	1901	0.42	0.02792	0.6287	0.0101591	0.381692	0.198513	1	-0.81216	0.490756	1	0.32489	0.725389	1	1.73872	0.000640608	0.0151904
1703	Klf16	118445	Kruppel-like factor 16	3	0	0	3979	-0.11	0.1369	1.002	0.0104603	0.166165	0.202791	1	-0.0680352	0.305187	0.999548	-0.0446869	0.549768	0.914269	-0.206225	0.00141047	0.0271086
1704	Smad9	55994	SMAD family member 9	3	0	0	4052	0.19	0.142	1.003	0.010456	0.372907	0.202791	1	0.199382	0.362804	0.999548	-0.197727	0.719781	1	0.556891	0.000905755	0.0197214
1705	Cipc	217732	CLOCK interacting protein, circadian	3	0	0	5225	-0.09	0.2318	1.031	0.0104689	0.853188	0.202791	1	0.00405623	0.948451	0.999548	-0.101979	0.0752569	0.516889	-0.172966	0.00331894	0.0515424
1706	Twsg1	65960	twisted gastrulation BMP signaling modulator 1	3	0	0	5460	0.09	0.2514	1.057	0.0105119	0.058615	0.203428	1	-0.0521561	0.388451	0.999548	0.128779	0.0761678	0.517814	0.205122	0.00804844	0.0953356
1707	Xirp1	22437	xin actin-binding repeat containing 1	3	0	0	97.7	1.99	9.41e-06	0.03153	0.0105763	0.0782721	0.204478	1	2.05087	0.427762	1	1.12508	0.228662	1	2.80524	0.00245352	1
1708	Uap1	107652	UDP-N-acetylglucosamine pyrophosphorylase 1	3	0	0	7560	0.08	0.438	1.129	0.0106271	0.74516	0.205067	1	-0.00815384	0.906602	0.999548	-0.0615486	0.46534	0.881895	0.321636	0.000572322	0.013933
1709	Mmd	67468	monocyte to macrophage differentiation-associated	3	0	0	4529	-0.09	0.1767	1.022	0.010685	0.312305	0.205789	1	-0.0179083	0.678463	0.999548	-0.0862938	0.0490716	0.434368	-0.167428	0.0073024	0.0892275
1710	Pbxip1	229534	pre B cell leukemia transcription factor interacting protein 1	3	0	0	5148	-0.09	0.2255	1.032	0.0107103	0.264114	0.205882	1	-0.057133	0.614693	0.999548	-0.241164	0.000618309	0.0254155	0.0397793	0.641599	0.914189
1711	Sprn	212518	shadow of prion protein	3	0	0	6051	-0.01	0.3023	1.045	0.010703	0.65468	0.205882	1	-0.0337721	0.868313	0.999548	0.331896	0.0306413	1	-0.33691	0.00915728	0.10385
1712	Tmem114	74720	transmembrane protein 114	3	0	0	1778	-0.57	0.02399	0.5978	0.0108305	0.571184	0.207794	1	0.146417	0.829708	1	-0.865908	0.0649206	1	-0.976395	0.00459165	0.0649181
1713	Hbp1	73389	high mobility group box transcription factor 1	3	0	0	8097	0.07	0.4866	1.125	0.010904	0.37815	0.209006	1	-0.0515995	0.575806	0.999548	-0.0285348	0.723139	0.952197	0.289402	0.000599119	0.0145025
1714	Doc2g	60425	double C2, gamma	3	0	33.3333	1895	-0.4	0.02773	0.6216	0.0109875	0.211369	0.209726	1	-0.652004	0.595681	1	0.467736	0.414853	1	-1.00583	0.00101931	0.0216206
1715	Als2	74018	alsin Rho guanine nucleotide exchange factor	3	0	0	5616	0.09	0.2647	1.059	0.011001	0.151821	0.209726	1	0.0837986	0.442634	0.999548	-0.0463481	0.533471	0.906808	0.23149	0.00106842	0.0224884
1716	Nsf	18195	N-ethylmaleimide sensitive fusion protein	3	0	0	5609	-0.07	0.264	1.039	0.0111062	0.351035	0.21127	1	0.0240505	0.705424	0.999548	-0.0912871	0.0121742	0.208629	-0.157141	0.0297342	0.222045
1717	Atp2b2	11941	ATPase, Ca++ transporting, plasma membrane 2	3	0	0	8839	-0.02	0.5526	1.068	0.011138	0.19019	0.211674	1	0.0988855	0.292082	0.999548	0.0240509	0.575081	0.924092	-0.168566	0.00152577	0.0289331
1718	Htr1f	15557	5-hydroxytryptamine (serotonin) receptor 1F	3	0	0	672	1.1	0.002306	0.2427	0.0112636	0.302262	0.213859	1	0.852626	0.197605	1	2.77643	0.0019603	1	-0.326699	0.671111	1
1719	Tab2	68652	TGF-beta activated kinase 1/MAP3K7 binding protein 2	3	0	0	7569	0.03	0.4387	1.129	0.0113331	0.470003	0.214976	1	-0.259048	0.0574823	0.999548	0.391997	0.00586247	1	-0.0468098	0.7775	0.953007
1720	Aldh7a1	110695	aldehyde dehydrogenase family 7, member A1	3	0	0	6689	0.05	0.3591	1.081	0.0114804	0.152231	0.217156	1	0.042506	0.533951	0.999548	-0.082283	0.173637	0.696145	0.175375	0.00287281	0.0464778
1721	Tspan12	269831	tetraspanin 12	3	0	0	6721	0.06	0.3619	1.081	0.0114745	0.187026	0.217156	1	-0.0610253	0.353061	0.999548	0.0273476	0.571875	0.923253	0.216125	0.00131831	0.025922
1722	Pde4dip	83679	phosphodiesterase 4D interacting protein (myomegalin)	3	0	0	3648	-0.12	0.1148	0.9845	0.0114947	0.173202	0.217222	1	-0.0702859	0.557422	0.999548	-0.0890663	0.152305	0.67344	-0.188665	0.00314225	0.0495816
1723	Prrg4	228413	proline rich Gla (G-carboxyglutamic acid) 4 (transmembrane)	3	33.3333	0	1852	0.53	0.02631	0.613	0.0115652	0.0836649	0.218348	1	-0.534017	0.297543	1	0.536653	0.437369	1	1.59058	0.00206594	0.0365212
1724	Tyrp1	22178	tyrosinase-related protein 1	3	0	0	132.4	1.89	2.38e-05	0.04351	0.0116324	0.258408	0.218954	1	-0.631242	0.636945	1	3.26701	0.0160615	1	3.01945	0.0264748	1
1725	Cdhr2	268663	cadherin-related family member 2	3	0	0	1750	0.41	0.02314	0.5779	0.0116173	0.286193	0.218954	1	0.584049	0.0120953	0.605197	0.543007	0.0339233	1	0.103342	0.659002	0.919717
1726	Ehmt2	110147	euchromatic histone lysine N-methyltransferase 2	3	0	0	2920	0.2	0.07207	0.8416	0.0116408	0.0602872	0.218954	1	0.0764849	0.39211	0.999548	0.287949	0.0115678	1	0.231817	0.059767	0.328083
1727	Tlnrd1	80889	talin rod domain containing 1	3	0	0	3636	0.14	0.114	0.9645	0.0116206	0.236274	0.218954	1	0.260342	0.00168573	0.259041	0.0434382	0.618213	1	0.125949	0.259557	0.685889
1728	Hspd1	15510	heat shock protein 1 (chaperonin)	3	0	0	9783	0	0.6331	1.052	0.0117207	0.314477	0.22025	1	-0.0142392	0.680033	0.999548	-0.0815011	0.0143846	0.227292	0.098224	0.0279559	0.215706
1729	Celsr1	12614	cadherin, EGF LAG seven-pass G-type receptor 1	3	0	0	7898	0.07	0.4687	1.141	0.0117375	0.17865	0.220361	1	-0.145792	0.563206	0.999548	-0.176086	0.250508	1	0.535858	0.00194181	0.0349554
1730	Tango2	27883	transport and golgi organization 2	3	0	0	4048	-0.12	0.1417	1.002	0.011785	0.773692	0.220634	1	-0.0084184	0.918028	0.999548	-0.109642	0.0880867	0.545599	-0.231103	0.00340535	0.0523752
1731	Tom1l2	216810	target of myb1-like 2 (chicken)	3	0	0	4631	-0.09	0.1845	1.026	0.0117654	0.301914	0.220634	1	-0.0322169	0.670854	0.999548	-0.0727852	0.17562	0.700055	-0.152941	0.00233241	0.0401219
1732	Tbc1d1	57915	TBC1 domain family, member 1	3	0	0	2967	0.21	0.07456	0.8451	0.0118428	0.143268	0.22151	1	0.0795463	0.523258	0.999548	0.146564	0.20321	1	0.399015	0.002606	0.0434254
1733	Apc	11789	adenomatosis polyposis coli	3	0	0	2220	-0.3	0.03959	0.6916	0.0119121	0.686909	0.222186	1	-0.0259226	0.882334	0.999548	-0.271773	0.0725204	0.509898	-0.601948	0.00436286	0.0626154
1734	Myo1c	17913	myosin IC	3	0	0	3019	0.24	0.07736	0.8542	0.0118919	0.492463	0.222186	1	0.0712369	0.571246	0.999548	0.0363081	0.789692	1	0.611531	0.00061751	0.0148353
1735	Gadd45a	13197	growth arrest and DNA-damage-inducible 45 alpha	3	0	0	5758	0.16	0.2768	1.06	0.0119099	0.898497	0.222186	1	-0.116111	0.454529	0.999548	0.00645239	0.964952	1	0.583351	0.000636348	0.0151597
1736	Unc13a	382018	unc-13 homolog A	3	0	0	2841	-0.18	0.06793	0.8293	0.011997	0.291292	0.223563	1	-0.0777025	0.662892	0.999548	-0.141614	0.110877	0.605138	-0.314821	0.00383278	0.0573615
1737	Bcor	71458	BCL6 interacting corepressor	3	0	0	6749	0.16	0.3644	1.084	0.0120444	0.713136	0.224237	1	-0.026916	0.893424	0.999548	-0.0412449	0.703754	1	0.539364	0.000450296	0.0117178
1738	Slc41a3	71699	solute carrier family 41, member 3	3	0	0	5167	0.1	0.2271	1.045	0.012083	0.160891	0.224748	1	0.0939402	0.543889	0.999548	-0.177623	0.197493	1	0.384329	0.00264659	0.0439299
1739	Elf1	13709	E74-like factor 1	3	0	0	3247	0.25	0.0902	0.8996	0.0121419	0.0855731	0.225427	1	-0.171203	0.440669	0.999548	0.303948	0.0686674	1	0.61564	0.00945323	0.105798
1740	Ppp1r15a	17872	protein phosphatase 1, regulatory subunit 15A	3	0	0	5110	0.16	0.2224	1.042	0.0122517	0.322693	0.226837	1	0.055311	0.685904	0.999548	-0.0670588	0.527163	1	0.488244	0.000800242	0.0179752
1741	Sumo1	22218	small ubiquitin-like modifier 1	3	0	0	5253	0.06	0.2341	1.052	0.0123222	0.764637	0.227513	1	0.00676661	0.914433	0.999548	0.0764454	0.0374819	0.377905	0.108753	0.00850417	0.0996009
1742	Ebp	13595	phenylalkylamine Ca2+ antagonist (emopamil) binding protein	3	0	0	5291	-0.09	0.2373	1.035	0.0123495	0.704146	0.227809	1	0.319859	0.0494453	0.979338	-0.0219709	0.889653	1	-0.557196	0.0066449	0.0840137
1743	Arl5b	75869	ADP-ribosylation factor-like 5B	3	0	0	5871	0.11	0.2866	1.058	0.0124606	0.603044	0.229437	1	0.0175348	0.844857	0.999548	-0.0205084	0.807306	0.970891	0.329456	0.000433488	0.0113533
1744	Kcns2	16539	K+ voltage-gated channel, subfamily S, 2	3	0	0	3606	0.21	0.1121	0.9594	0.0126191	0.419623	0.231931	1	0.45049	0.00218579	0.291369	0.246661	0.183616	1	-0.0594277	0.748663	0.945061
1745	Nol4	319211	nucleolar protein 4	3	0	0	5127	0.11	0.2238	1.043	0.0126861	0.333541	0.232949	1	-0.0271534	0.693505	0.999548	0.122204	0.0847843	0.53877	0.229385	0.0051449	0.0710217
1746	Cers4	67260	ceramide synthase 4	3	0	0	1926	0.36	0.02876	0.6307	0.0127012	0.0724146	0.233013	1	0.383772	0.0402412	0.943281	0.493702	0.018063	1	0.21575	0.416814	0.808947
1747	Gstz1	14874	glutathione transferase zeta 1 (maleylacetoacetate isomerase)	3	0	0	5652	0.07	0.2677	1.057	0.0127402	0.0852129	0.233303	1	0.257681	0.0040903	0.387406	-0.125776	0.168984	1	0.0744021	0.44005	0.822224
1748	Pcgf5	76073	polycomb group ring finger 5	3	0	0	2317	0.27	0.04355	0.7195	0.0127807	0.0932262	0.233408	1	0.17204	0.453432	0.999548	0.20205	0.304712	1	0.42091	0.00221037	0.0384363
1749	Gm43738		predicted gene 43738	3	0	0	4680	-0.08	0.1883	1.027	0.0128311	0.214323	0.234115	1	-0.0383755	0.442249	0.999548	-0.0162943	0.598443	0.924724	-0.192662	0.00115973	0.0236028
1750	Lrig1	16206	leucine-rich repeats and immunoglobulin-like domains 1	3	0	0	3564	0.17	0.1094	0.9566	0.0130573	0.156069	0.237865	1	0.0669614	0.5384	0.999548	0.0773552	0.448208	1	0.352686	0.00130066	0.025654
1751	Ndn	17984	necdin	3	0	0	7042	-0.04	0.3909	1.103	0.0130603	0.940539	0.237865	1	0.00176173	0.957405	0.999548	-0.000756244	0.979773	0.997702	-0.131154	0.000334699	0.00927936
1752	Cirbp	12696	cold inducible RNA binding protein	3	0	0	5355	0.1	0.2426	1.058	0.0131145	0.763407	0.238636	1	0.091714	0.310709	0.999548	-0.0102992	0.913942	0.987346	0.226386	0.00111148	0.0230116
1753	Lpl	16956	lipoprotein lipase	3	0	0	4136	0.12	0.1479	1.008	0.0131363	0.480011	0.238817	1	0.0187678	0.782979	0.999548	0.130046	0.0755273	0.516889	0.194522	0.00534868	0.0731072
1754	Fem1c	240263	fem-1 homolog c (C.elegans)	3	0	0	6315	0.08	0.3255	1.064	0.0131628	0.208047	0.239082	1	-0.0570113	0.354864	0.999548	0.0330479	0.592544	0.924319	0.263267	0.00150812	0.0286835
1755	Ankrd39	109346	ankyrin repeat domain 39	3	0	0	5989	-0.05	0.2968	1.04	0.0131895	0.492161	0.239351	1	0.0495141	0.789531	0.999548	0.434635	0.0239241	1	-0.639586	0.0168321	0.15703
1756	Armh4	67419	armadillo-like helical domain containing 4	3	0	0	3122	0.19	0.08308	0.8709	0.0132456	0.105372	0.240153	1	0.138446	0.0961132	0.999548	0.0683538	0.472327	0.883147	0.37249	0.00704173	0.0875489
1757	Adgrb2	230775	adhesion G protein-coupled receptor B2	3	0	0	7996	-0.05	0.4775	1.13	0.0132883	0.48143	0.24071	1	0.0573188	0.341923	0.999548	0.0148642	0.78375	0.964652	-0.21439	0.00119781	0.0240835
1758	Rbms1	56878	RNA binding motif, single stranded interacting protein 1	3	0	0	3759	0.24	0.122	0.979	0.0133556	0.336037	0.241493	1	0.4899	0.00591325	0.467316	-0.0711402	0.695231	1	0.299361	0.0785855	0.385863
1759	Sfmbt1	54650	Scm-like with four mbt domains 1	3	0	0	4418	0.17	0.1684	1.024	0.0133554	0.421691	0.241493	1	0.136156	0.241795	0.999548	-0.0404093	0.749891	1	0.40737	0.00178175	0.0325787
1760	Plxnb1	235611	plexin B1	3	0	0	4098	-0.16	0.1452	1.005	0.0134717	0.829865	0.242937	1	0.0104541	0.939729	0.999548	-0.141666	0.102286	0.58058	-0.345468	0.00339852	0.0523332
1761	Sorbs2	234214	sorbin and SH3 domain containing 2	3	0	0	6196	-0.04	0.315	1.049	0.0134517	0.255321	0.242937	1	-0.0539213	0.634398	0.999548	0.11008	0.149502	0.668775	-0.180145	0.00343776	0.0528101
1762	Herpud1	64209	homocysteine-inducible, endoplasmic reticulum stress-inducible, ubiquitin-like domain member 1	3	0	0	4743	-0.08	0.1932	1.026	0.0134925	0.148197	0.243094	1	-0.152439	0.0217035	0.76231	-0.149648	0.0284987	0.335732	0.052942	0.529191	0.866769
1763	Shroom3	27428	shroom family member 3	3	0	0	1835	-0.33	0.02579	0.6122	0.0135432	0.144617	0.243572	1	-0.177639	0.524896	0.999548	-0.313949	0.0900957	1	-0.486244	0.00695469	0.0870596
1764	Cplx2	12890	complexin 2	3	0	0	8937	-0.01	0.5612	1.064	0.0135627	0.134308	0.243704	1	0.0926161	0.237703	0.999548	0.0248334	0.512115	0.902892	-0.160292	0.00270677	0.0444098
1765	Uqcrc2	67003	ubiquinol cytochrome c reductase core protein 2	3	0	0	5182	-0.06	0.2283	1.032	0.0136314	0.395585	0.24472	1	-0.0172568	0.734085	0.999548	-0.0900051	0.0141086	0.224136	-0.0830642	0.0320208	0.231322
1766	Rnf208	68846	ring finger protein 208	3	0	0	4957	-0.08	0.2101	1.032	0.0137621	0.789489	0.246187	1	-0.00540402	0.924234	0.999548	-0.0346661	0.572046	0.923253	-0.211432	0.000634979	0.0151597
1767	Pogk	71592	pogo transposable element with KRAB domain	3	0	0	4697	0.12	0.1896	1.04	0.0138935	0.613175	0.247876	1	0.0281099	0.735771	0.999548	0.0142138	0.849562	0.978262	0.300786	0.000543654	0.0133624
1768	Sh3glb2	227700	SH3-domain GRB2-like endophilin B2	3	0	0	5286	-0.08	0.2369	1.035	0.0139513	0.893336	0.248687	1	-0.00758081	0.895266	0.999548	-0.00234201	0.963101	0.993815	-0.215145	0.000396232	0.0105505
1769	Pygb	110078	brain glycogen phosphorylase	3	0	0	4378	-0.08	0.1654	1.02	0.0140119	0.084851	0.249546	1	-0.0481404	0.439426	0.999548	-0.127643	0.00423053	0.103613	-0.0664538	0.184801	0.601616
1770	Deptor	97998	DEP domain containing MTOR-interacting protein	3	0	0	4104	0.23	0.1456	1.004	0.0140271	0.627881	0.249595	1	-0.255169	0.422172	1	0.0581739	0.8563	1	0.899216	0.000951643	0.0205455
1771	Thbs3	21827	thrombospondin 3	3	0	0	1837	-0.38	0.02583	0.6118	0.0141204	0.316324	0.250811	1	-0.111968	0.681362	1	-0.55059	0.0256275	1	-0.468196	0.01987	0.175385
1772	Kctd1	106931	potassium channel tetramerisation domain containing 1	3	0	0	5688	-0.11	0.2707	1.041	0.0141096	0.67309	0.250811	1	-0.02659	0.876377	0.999548	0.0807693	0.568235	1	-0.381442	0.000696043	0.0162933
1773	Fhl1	14199	four and a half LIM domains 1	3	0	0	8960	0.03	0.5632	1.079	0.0141614	0.303552	0.251096	1	-0.0178966	0.672065	0.999548	-0.0251609	0.527792	0.906808	0.130551	0.000981801	0.0210534
1774	Npas4	225872	neuronal PAS domain protein 4	3	0	0	1070	0.64	0.007269	0.3627	0.0142138	0.0835045	0.251803	1	0.549324	0.285926	1	1.12197	0.00279982	1	0.248719	0.437089	0.820955
1775	Supt20	56790	suppressor of Ty 20	3	0	0	8091	0.05	0.4861	1.125	0.0142924	0.833194	0.252973	1	-0.150924	0.130097	0.999548	-0.00817375	0.940983	1	0.321816	0.00287858	0.0465122
1776	Wdr17	244484	WD repeat domain 17	3	0	0	3175	-0.19	0.08605	0.9002	0.0143358	0.918868	0.253441	1	-0.00433075	0.97219	0.999548	-0.287537	0.0253481	1	-0.273909	0.0143555	0.140812
1777	Smpdl3a	57319	sphingomyelin phosphodiesterase, acid-like 3A	3	0	0	3436	-0.23	0.1015	0.9539	0.0143441	0.645484	0.253441	1	0.0554635	0.864228	1	-0.35947	0.0582197	1	-0.39329	0.00703624	0.0875489
1778	Arhgef28	110596	Rho guanine nucleotide exchange factor (GEF) 28	3	0	0	2976	-0.18	0.07505	0.8511	0.0144026	0.263622	0.253584	1	-0.0659125	0.641201	0.999548	-0.11552	0.284916	1	-0.352714	0.00194804	0.034969
1779	Neto2	74513	neuropilin (NRP) and tolloid (TLL)-like 2	3	0	0	5486	0.1	0.2536	1.055	0.0143826	0.506734	0.253584	1	-0.0133161	0.797248	0.999548	0.0731848	0.13328	0.642909	0.240912	0.0033433	0.0517321
1780	Nrp2	18187	neuropilin 2	3	0	0	8236	0	0.4991	1.114	0.0144002	0.645153	0.253584	1	-0.0230051	0.864081	0.999548	-0.283143	0.012903	1	0.308506	0.0319134	0.231248
1781	Sult2b1	54200	sulfotransferase family, cytosolic, 2B, member 1	3	0	0	2847	0.25	0.06824	0.8325	0.0144557	0.669883	0.254296	1	0.0207649	0.874983	0.999548	0.352137	0.0253175	1	0.384256	0.0161413	0.152606
1782	Dpy30	66310	dpy-30, histone methyltransferase complex regulatory subunit	3	0	0	5448	0.09	0.2504	1.058	0.0145046	0.208578	0.254711	1	-0.0439656	0.593047	0.999548	0.142314	0.0361327	0.37066	0.178084	0.0167592	0.156579
1783	Tmcc2	68875	transmembrane and coiled-coil domains 2	3	0	0	4535	-0.09	0.1772	1.022	0.0146393	0.597228	0.256628	1	-0.0103824	0.842132	0.999548	-0.092104	0.0336928	0.361398	-0.170288	0.012808	0.130334
1784	Tmem63c	217733	transmembrane protein 63c	3	0	0	3062	-0.17	0.07973	0.877	0.0146672	0.361039	0.256729	1	-0.134432	0.332975	0.999548	-0.0419863	0.712063	1	-0.343228	0.00153649	0.0290502
1785	Gstp1	14870	glutathione S-transferase, pi 1	3	0	0	6768	0.06	0.3661	1.084	0.0146706	0.417695	0.256729	1	-0.0504208	0.492109	0.999548	0.0184176	0.747515	0.957655	0.222766	0.000990625	0.0211725
1786	Serinc5	218442	serine incorporator 5	3	0	0	4605	0.15	0.1825	1.039	0.0146984	0.158127	0.256993	1	-0.0444481	0.540757	0.999548	0.182562	0.00833264	0.160063	0.297318	0.0810706	0.392261
1787	Nup107	103468	nucleoporin 107	3	0	0	7481	-0.05	0.4308	1.122	0.0147376	0.37438	0.257453	1	-0.253457	0.00109984	0.199486	0.0352956	0.720727	1	0.0777577	0.462412	0.833612
1788	Chia1	81600	chitinase, acidic 1	3	0	0	6094	0.07	0.306	1.061	0.0147524	0.477569	0.257489	1	-0.349637	0.161881	0.999548	0.63501	0.00290057	1	-0.0740738	0.78165	0.95461
1789	Snx19	102607	sorting nexin 19	3	0	0	3669	-0.11	0.1162	0.983	0.0148434	0.0724328	0.258655	1	-0.169716	0.0174625	0.714103	-0.0601166	0.416849	0.867158	-0.113527	0.0508208	0.302228
1790	Jph3	57340	junctophilin 3	3	0	0	4396	-0.09	0.1668	1.021	0.0148697	0.409058	0.258862	1	-0.057481	0.442471	0.999548	-0.0173342	0.742327	0.956659	-0.200797	0.00112884	0.0232331
1791	Car5b	56078	carbonic anhydrase 5b, mitochondrial	3	0	0	1069	-0.53	0.007242	0.4045	0.0148901	0.106725	0.258993	1	-0.807923	0.135952	1	-0.206137	0.474339	1	-0.569967	0.00575974	0.0762748
1792	Zdhhc14	224454	zinc finger, DHHC domain containing 14	3	0	0	5615	-0.09	0.2646	1.039	0.0151253	0.383719	0.262857	1	0.0633303	0.485924	0.999548	-0.0309318	0.726671	0.952653	-0.311609	0.00107331	0.0224884
1793	Nolc1	70769	nucleolar and coiled-body phosphoprotein 1	3	0	0	4008	-0.1	0.1389	1.002	0.0151531	0.330537	0.263112	1	-0.0413944	0.691417	0.999548	-0.0877867	0.107732	0.597726	-0.175628	0.0051	0.0706209
1794	Il4ra	16190	interleukin 4 receptor, alpha	3	0	0	6775	0.04	0.3668	1.084	0.0152457	0.119695	0.264264	1	-0.324764	0.383799	1	-0.216262	0.492824	1	0.664743	0.00202425	0.036027
1795	Dlc1	50768	deleted in liver cancer 1	3	0	0	7895	0.06	0.4683	1.141	0.0154645	0.39675	0.267364	1	-0.0617868	0.734805	0.999548	-0.210695	0.120863	1	0.462851	0.0043909	0.0628445
1796	Oprl1	18389	opioid receptor-like 1	3	0	0	4169	0.15	0.1502	1.011	0.0155136	0.133841	0.267626	1	0.164059	0.181702	0.999548	0.370944	0.0042128	1	-0.0853747	0.51152	0.857972
1797	Ccdc126	57895	coiled-coil domain containing 126	3	0	0	4826	-0.09	0.1997	1.028	0.0155196	0.164489	0.267626	1	-0.339123	0.00452195	0.400247	-0.0828264	0.547914	1	0.148667	0.158114	0.554655
1798	Cpne5	240058	copine V	3	0	0	4718	-0.15	0.1912	1.025	0.015562	0.588576	0.268127	1	0.0178568	0.838045	0.999548	-0.0563311	0.426897	0.870462	-0.414965	0.00109887	0.0228367
1799	Foxk2	68837	forkhead box K2	3	0	0	5636	-0.08	0.2663	1.04	0.0158239	0.333472	0.271762	1	0.022642	0.693457	0.999548	-0.0573446	0.190569	0.722686	-0.206936	0.00303947	0.0484383
1800	Morc4	75746	microrchidia 4	3	0	0	5117	0.05	0.223	1.042	0.015827	0.227856	0.271762	1	-0.411878	0.0267184	0.827667	0.0965873	0.610783	1	0.466835	0.0246197	0.20145
1801	Mcrs1	51812	microspherule protein 1	3	0	0	4296	-0.09	0.1594	1.019	0.0160343	0.443259	0.274249	1	-0.0872995	0.0751494	0.999548	-0.016754	0.762464	0.961578	-0.168894	0.0071305	0.0879681
1802	Gucy1b1	54195	guanylate cyclase 1, soluble, beta 1	3	0	0	4364	0.09	0.1644	1.02	0.01604	0.965057	0.274249	1	0.120795	0.105844	0.999548	0.158973	0.00390794	0.0977484	0.00109012	0.988214	0.997933
1803	Zfp536	243937	zinc finger protein 536	3	0	0	2193	0.32	0.03855	0.6933	0.0161568	0.255903	0.276011	1	0.446239	0.0179562	0.714103	0.403831	0.0361928	1	0.114977	0.63488	0.912756
1804	Tcerg1l	70571	transcription elongation regulator 1-like	3	0	0	4192	0.13	0.1519	1.014	0.0161734	0.0991271	0.27606	1	0.199415	0.116632	0.999548	0.303385	0.00765399	1	-0.113339	0.462804	0.833935
1805	Rgl1	19731	ral guanine nucleotide dissociation stimulator,-like 1	3	0	0	6141	-0.04	0.3102	1.047	0.0163399	0.324424	0.278193	1	0.122908	0.220492	0.999548	-0.227454	0.00276318	0.0783269	-0.027888	0.687128	0.927369
1806	Atp1a3	232975	ATPase, Na+/K+ transporting, alpha 3 polypeptide	3	0	0	6742	-0.04	0.3638	1.083	0.0163548	0.199388	0.278211	1	0.0347558	0.584206	0.999548	-0.0423013	0.074057	0.516152	-0.122134	0.0096876	0.107574
1807	Mmp2	17390	matrix metallopeptidase 2	3	0	0	2499	-0.21	0.05144	0.7627	0.0164009	0.116216	0.27876	1	-0.0964326	0.488003	0.999548	-0.170959	0.130466	1	-0.37649	0.00660706	0.0838579
1808	Ttc7b	104718	tetratricopeptide repeat domain 7B	3	0	0	5697	0.06	0.2715	1.057	0.0165407	0.108651	0.280899	1	0.18306	0.00300167	0.322432	0.0612755	0.296924	0.814428	-0.0525576	0.477175	0.839688
1809	Psen2	19165	presenilin 2	3	0	0	8541	0	0.5263	1.095	0.0167267	0.686138	0.283339	1	-0.017508	0.882004	0.999548	-0.224886	0.0296332	1	0.249273	0.0165084	0.154801
1810	Trak2	70827	trafficking protein, kinesin binding 2	3	0	0	4793	-0.08	0.1971	1.026	0.0167425	0.816224	0.283368	1	-0.0459775	0.56901	0.999548	-0.0055993	0.934551	0.990779	-0.178383	0.000812382	0.0181522
1811	Gars	353172	glycyl-tRNA synthetase	3	0	0	4997	-0.06	0.2133	1.031	0.0169946	0.38535	0.28691	1	-0.0967747	0.0108594	0.602156	-0.0547608	0.0557327	0.455985	-0.0148987	0.727699	0.939331
1812	Pum3	52874	pumilio RNA-binding family member 3	3	0	0	5531	-0.03	0.2574	1.04	0.0169804	0.103571	0.28691	1	-0.219324	0.0113435	0.602156	-0.0647795	0.46962	0.883147	0.192773	0.082586	0.395775
1813	Pithd1	66193	PITH (C-terminal proteasome-interacting domain of thioredoxin-like) domain containing 1	3	0	0	6054	-0.06	0.3025	1.045	0.0172095	0.119615	0.289809	1	0.0393613	0.492714	0.999548	-0.080125	0.120311	0.6229	-0.13473	0.00755136	0.091223
1814	Tmem117	320709	transmembrane protein 117	3	0	0	3364	0.21	0.09711	0.9201	0.0173123	0.322264	0.291052	1	0.0522826	0.685599	0.999548	0.0795456	0.449864	1	0.508314	0.00146257	0.0279001
1815	Fgf13	14168	fibroblast growth factor 13	3	0	0	8085	-0.04	0.4855	1.122	0.0173297	0.0579524	0.291101	1	0.0450624	0.386982	0.999548	0.0455642	0.259455	0.785056	-0.224958	0.00449863	0.0639567
1816	Lrrc58	320184	leucine rich repeat containing 58	3	0	0	3947	-0.12	0.1347	0.999	0.0173495	0.262839	0.291191	1	-0.0358891	0.640565	0.999548	-0.249684	0.00136205	0.0448678	-0.0601837	0.518464	0.862487
1817	Grn	14824	granulin	3	0	0	7086	0.04	0.3949	1.104	0.0174195	0.0659897	0.292122	1	-0.0813154	0.0909534	0.999548	0.0416067	0.404103	0.862234	0.150559	0.0123716	0.127005
1818	Wars	22375	tryptophanyl-tRNA synthetase	3	0	0	3381	-0.13	0.09814	0.9437	0.0174673	0.153138	0.292679	1	-0.0663107	0.535009	0.999548	-0.148323	0.0285013	0.335732	-0.172682	0.0299261	0.222555
1819	Nim1k	245269	NIM1 serine/threonine protein kinase	3	0	0	3153	-0.19	0.08482	0.8957	0.0175189	0.939625	0.293229	1	-0.00374652	0.979456	0.999548	-0.237551	0.0446334	1	-0.330949	0.0104783	0.114074
1820	Stk11ip	71728	serine/threonine kinase 11 interacting protein	3	0	0	3695	-0.13	0.1178	0.9838	0.0175293	0.609305	0.293229	1	-0.0170752	0.84777	0.999548	-0.177109	0.0279619	0.333709	-0.200053	0.0193385	0.17224
1821	D17H6S53E	114585	DNA segment, Chr 17, human D6S53E	3	0	0	3265	0.18	0.09127	0.9027	0.0175923	0.0868216	0.294039	1	0.107191	0.354069	0.999548	0.082289	0.442802	1	0.337606	0.00293756	0.047167
1822	Ndufaf8	208501	NADH:ubiquinone oxidoreductase complex assembly factor 8	3	0	0	3798	0.13	0.1247	0.9794	0.0177365	0.976936	0.296203	1	0.14169	0.211716	0.999548	0.25743	0.00221564	1	0.00105887	0.992252	0.998203
1823	Bcat1	12035	branched chain aminotransferase 1, cytosolic	3	0	0	6679	-0.03	0.3581	1.079	0.017786	0.14137	0.296782	1	-0.0466442	0.0528297	0.999548	-0.0757358	0.0169736	0.24971	0.029085	0.520937	0.863834
1824	Gramd4	223752	GRAM domain containing 4	3	0	0	5891	0.09	0.2883	1.057	0.017905	0.596677	0.298521	1	0.050974	0.451256	0.999548	-0.0160373	0.841873	0.978262	0.224742	0.00124028	0.0246917
1825	Syt4	20983	synaptotagmin IV	3	0	0	4614	0.09	0.1832	1.039	0.017948	0.28673	0.29899	1	0.0771619	0.0393218	0.936841	0.0200301	0.659414	0.939086	0.181263	0.0182284	0.164086
1826	Serinc2	230779	serine incorporator 2	3	0	0	2070	0.37	0.03385	0.6759	0.0179742	0.624889	0.299178	1	0.0402797	0.854937	0.999548	0.357337	0.223774	1	0.69709	0.00247523	0.0418229
1827	Pitpna	18738	phosphatidylinositol transfer protein, alpha	3	0	0	5866	-0.05	0.2861	1.043	0.0180855	0.758843	0.300783	1	-0.00346507	0.912117	0.999548	-0.0233712	0.47817	0.884204	-0.121802	0.00109446	0.02281
1828	Tns3	319939	tensin 3	3	0	0	4972	0.13	0.2113	1.045	0.0181073	0.200872	0.300896	1	-0.0753221	0.585652	0.999548	0.114768	0.135931	0.64633	0.363924	0.00600557	0.0780846
1829	Tk1	21877	thymidine kinase 1	3	0	0	4948	-0.15	0.2094	1.031	0.0182286	0.354981	0.302661	1	-0.0369104	0.708057	0.999548	0.0954826	0.364482	1	-0.518957	0.00186864	0.033973
1830	Acacb	100705	acetyl-Coenzyme A carboxylase beta	3	0	0	222.7	-1.45	0.0001108	0.1311	0.018276	0.330771	0.303198	1	-0.565771	0.69158	1	-2.56365	0.0210776	1	-1.20936	0.0331947	0.235589
1831	Cyp2d22	56448	cytochrome P450, family 2, subfamily d, polypeptide 22	3	0	0	1505	-0.41	0.01632	0.5242	0.0182961	0.255907	0.30328	1	-0.282404	0.634884	1	-0.725518	0.00532219	1	-0.212379	0.143405	0.524599
1832	Gcat	26912	glycine C-acetyltransferase (2-amino-3-ketobutyrate-coenzyme A ligase)	3	0	0	2767	-0.18	0.0642	0.8133	0.0183666	0.0672718	0.303965	1	-0.0785636	0.406703	0.999548	-0.16438	0.0721468	0.508488	-0.301665	0.0165967	0.155407
1833	Nefl	18039	neurofilament, light polypeptide	3	0	0	8353	-0.03	0.5096	1.099	0.0183827	0.233917	0.303965	1	0.0690851	0.319132	0.999548	0.0186946	0.616151	0.931369	-0.191531	0.00247942	0.0418229
1834	Lrrc75b	192734	leucine rich repeat containing 75B	3	0	0	6041	0.1	0.3013	1.062	0.0184	0.805244	0.304001	1	-0.0725566	0.569981	0.999548	0.372925	0.000920526	1	0.014582	0.930342	0.986253
1835	Map1b	17755	microtubule-associated protein 1B	3	0	0	3747	-0.13	0.1213	0.9883	0.0184535	0.940919	0.304633	1	-0.00490259	0.979905	0.999548	-0.148861	0.0801807	0.52559	-0.245977	0.00623617	0.0804284
1836	F2r	14062	coagulation factor II (thrombin) receptor	3	0	0	6399	0.08	0.333	1.068	0.018511	0.908197	0.305332	1	0.00330248	0.968412	0.999548	-0.0593094	0.407772	0.864053	0.307894	0.0012458	0.0247629
1837	Itga7	16404	integrin alpha 7	3	0	0	1714	-0.4	0.02205	0.5888	0.018527	0.208986	0.305346	1	-0.448657	0.149311	1	-0.675137	0.00555836	1	-0.0889974	0.593434	0.896263
1838	Cfap77	329375	cilia and flagella associated protein 77	3	0	0	1404	-0.57	0.01386	0.4872	0.018621	0.501084	0.305869	1	-0.107998	0.794274	1	-2.43834	0.241125	1	0.82217	0.00258851	0.0432468
1839	Acad9	229211	acyl-Coenzyme A dehydrogenase family, member 9	3	0	0	4000	-0.1	0.1384	1.001	0.0186053	0.312544	0.305869	1	-0.111799	0.0449747	0.956359	-0.0225861	0.678637	0.944446	-0.173755	0.0162249	0.152972
1840	Ccng1	12450	cyclin G1	3	0	0	6465	-0.03	0.339	1.061	0.01865	0.141745	0.305869	1	-0.0488857	0.245441	0.999548	-0.0915854	0.00388172	0.0977268	0.0402525	0.521398	0.864003
1841	Jak2	16452	Janus kinase 2	3	0	0	8392	0.06	0.513	1.101	0.0185869	0.314713	0.305869	1	-0.0670749	0.420889	0.999548	-0.0329533	0.680202	0.944446	0.263731	0.00172753	0.0320458
1842	Fgfbp3	72514	fibroblast growth factor binding protein 3	3	0	0	2939	0.25	0.07304	0.845	0.018881	0.795358	0.308842	1	0.0107705	0.926519	0.999548	0.364053	0.0170883	1	0.361702	0.0318807	0.231248
1843	1810037I17Rik	67704	RIKEN cDNA 1810037I17 gene	3	0	0	8020	-0.02	0.4797	1.128	0.0188684	0.454485	0.308842	1	-0.168281	0.00669196	0.483917	0.0780169	0.0980189	0.566524	0.0171053	0.768847	0.950652
1844	Ankfy1	11736	ankyrin repeat and FYVE domain containing 1	3	0	0	7629	0.01	0.4442	1.132	0.0188927	0.794371	0.308842	1	0.00757604	0.926135	0.999548	-0.139637	0.0137439	0.220834	0.155161	0.0396867	0.260923
1845	Rnd2	11858	Rho family GTPase 2	3	0	0	5127	0.1	0.2238	1.043	0.0189185	0.977519	0.309013	1	-0.000799726	0.992449	0.999548	0.196147	0.00181393	0.0555326	0.108613	0.281106	0.708283
1846	Ednrb	13618	endothelin receptor type B	3	0	0	4709	0.1	0.1905	1.043	0.0190179	0.246598	0.310132	1	0.03607	0.62709	0.999548	0.0387678	0.386297	0.855664	0.214036	0.0021033	0.0369262
1847	Camk2n1	66259	calcium/calmodulin-dependent protein kinase II inhibitor 1	3	0	0	7095	-0.09	0.3957	1.107	0.0190164	0.864621	0.310132	1	0.103085	0.399146	0.999548	0.00541681	0.952669	0.991764	-0.365974	0.00133979	0.0261432
1848	Mtfp1	67900	mitochondrial fission process 1	3	0	0	2987	-0.18	0.07563	0.8548	0.0190821	0.29879	0.310927	1	-0.046389	0.668532	0.999548	-0.144277	0.237943	1	-0.343765	0.00321706	0.0503887
1849	Gldc	104174	glycine decarboxylase	3	0	0	5003	-0.1	0.2138	1.03	0.019138	0.0762847	0.311584	1	0.0810227	0.424111	0.999548	-0.100947	0.211669	0.747043	-0.267451	0.00572223	0.0761039
1850	Fam167a	219148	family with sequence similarity 167, member A	3	0	0	2874	-0.18	0.06963	0.8328	0.0194941	0.216107	0.314748	1	-0.245641	0.0587173	0.999548	-0.239748	0.014932	0.230975	-0.0536955	0.600099	0.898408
1851	Map6	17760	microtubule-associated protein 6	3	0	0	5127	-0.07	0.2238	1.031	0.0195358	0.559557	0.314748	1	-0.0156939	0.82404	0.999548	-0.0458894	0.285103	0.801835	-0.153599	0.00224576	0.0388403
1852	Kat2a	14534	K(lysine) acetyltransferase 2A	3	0	0	5678	-0.08	0.2699	1.04	0.0194472	0.650098	0.314748	1	0.00951005	0.866283	0.999548	-0.0791127	0.10405	0.584913	-0.156475	0.00581894	0.076593
1853	Disp2	214240	dispatched RND tramsporter family member 2	3	0	0	5715	-0.07	0.2731	1.042	0.0195343	0.327739	0.314748	1	0.0431577	0.68946	0.999548	-0.102328	0.0212967	0.280677	-0.143604	0.0359292	0.247098
1854	Neurod6	11922	neurogenic differentiation 6	3	0	0	6121	-0.05	0.3084	1.047	0.0194219	0.246854	0.314748	1	-0.162147	0.00139321	0.233552	-0.0223693	0.599125	0.924798	0.0470444	0.627307	0.911092
1855	Rab40b	217371	Rab40B, member RAS oncogene family	3	0	0	7645	0.02	0.4457	1.133	0.0195577	0.61037	0.314849	1	0.290899	0.0351317	0.914582	-0.0202994	0.848264	1	-0.216914	0.0177303	0.161749
1856	Tnfaip6	21930	tumor necrosis factor alpha induced protein 6	3	0	0	4060	0.21	0.1426	1.004	0.0197117	0.293982	0.31682	1	-0.0931141	0.664927	0.999548	0.0963066	0.648597	1	0.618889	0.00123773	0.0246793
1857	Kif1bp	72320	KIF1 binding protein	3	0	0	8937	-0.02	0.5612	1.064	0.0197436	0.154561	0.317081	1	0.0336709	0.536661	0.999548	0.0511848	0.244979	0.775018	-0.150362	0.00406876	0.0598421
1858	Ogdh	18293	oxoglutarate (alpha-ketoglutarate) dehydrogenase (lipoamide)	3	0	0	5087	-0.07	0.2206	1.031	0.01983	0.449406	0.317959	1	-0.0162624	0.765972	0.999548	-0.0964419	0.0159621	0.239962	-0.0878672	0.044	0.277655
1859	Jakmip1	76071	janus kinase and microtubule interacting protein 1	3	0	0	3808	-0.13	0.1253	0.9888	0.0199108	0.70711	0.318932	1	-0.0109107	0.8909	0.999548	-0.116763	0.170088	0.693697	-0.273939	0.00356904	0.0543046
1860	Dner	227325	delta/notch-like EGF repeat containing	3	0	0	5455	0.06	0.251	1.057	0.0199369	0.112599	0.318932	1	0.0391667	0.304979	0.999548	0.0218935	0.482886	0.886795	0.116174	0.00367856	0.0555742
1861	Slc6a11	243616	solute carrier family 6 (neurotransmitter transporter, GABA), member 11	3	0	0	3753	-0.13	0.1217	0.9888	0.0201382	0.533634	0.321236	1	-0.0176342	0.811112	0.999548	-0.200548	0.0138203	0.22135	-0.172451	0.0489639	0.295298
1862	Cables2	252966	CDK5 and Abl enzyme substrate 2	3	0	0	4242	-0.13	0.1555	1.018	0.0201462	0.312711	0.321236	1	-0.190331	0.0379011	0.931861	0.0420723	0.678757	1	-0.250576	0.0213467	0.183355
1863	Nfkb1	18033	nuclear factor of kappa light polypeptide gene enhancer in B cells 1, p105	3	0	0	8215	0.01	0.4972	1.116	0.0201189	0.89351	0.321236	1	-0.29352	0.063317	0.999548	-0.0061073	0.963163	1	0.3204	0.00898903	0.102579
1864	Gpr85	64450	G protein-coupled receptor 85	3	0	0	6727	0.03	0.3625	1.082	0.0201687	0.5359	0.32134	1	0.150191	0.0026081	0.306979	0.0116219	0.812259	0.973293	-0.0651181	0.259602	0.685889
1865	Ndufa10	67273	NADH:ubiquinone oxidoreductase subunit A10	3	0	0	2948	0.61	0.07355	0.8475	0.0202012	0.291391	0.321398	1	1.9952	0.651039	1	-0.0221234	0.662967	0.941052	-0.145028	0.00127685	0.0252623
1866	Man1b1	227619	mannosidase, alpha, class 1B, member 1	3	0	0	4838	-0.06	0.2006	1.028	0.0202043	0.254668	0.321398	1	-0.0628729	0.119544	0.999548	-0.0963251	0.00727452	0.144999	-0.0240929	0.633857	0.912214
1867	Fads3	60527	fatty acid desaturase 3	3	0	0	3478	-0.13	0.1041	0.9602	0.0202427	0.245703	0.321755	1	-0.20541	0.00976501	0.565655	-0.0354533	0.62633	0.932426	-0.159361	0.0903492	0.415828
1868	Wdr5b	69544	WD repeat domain 5B	3	0	0	3547	0.27	0.1084	0.9521	0.0202743	0.158816	0.3218	1	0.356597	0.0599371	0.999548	-0.120269	0.541541	1	0.558473	0.0170591	0.157994
1869	Cap2	67252	CAP, adenylate cyclase-associated protein, 2 (yeast)	3	0	0	8721	-0.01	0.5423	1.075	0.0202811	0.0583197	0.3218	1	0.0949143	0.387798	0.999548	0.107057	0.175422	0.700055	-0.222442	0.00814299	0.0959221
1870	Gdi1	14567	guanosine diphosphate (GDP) dissociation inhibitor 1	3	0	0	5779	-0.05	0.2786	1.043	0.0203412	0.902903	0.321992	1	-0.00134629	0.966527	0.999548	-0.0710851	0.00499132	0.115964	-0.0673714	0.11527	0.470191
1871	Tspan6	56496	tetraspanin 6	3	0	0	7114	0.05	0.3974	1.105	0.0203272	0.402975	0.321992	1	-0.0379647	0.544414	0.999548	0.0135511	0.738628	0.95547	0.173006	0.00138166	0.0267156
1872	Rab21	216344	RAB21, member RAS oncogene family	3	0	0	6081	-0.05	0.3049	1.046	0.0205428	0.114087	0.324218	1	0.0459815	0.485004	0.999548	-0.151107	0.00474223	0.113312	-0.0599762	0.244904	0.673514
1873	Pacsin1	23969	protein kinase C and casein kinase substrate in neurons 1	3	0	0	3075	-0.2	0.08042	0.8764	0.0206101	0.758576	0.324517	1	-0.0175746	0.91201	0.999548	-0.194035	0.128157	1	-0.388476	0.00483988	0.0676789
1874	Rhog	56212	ras homolog family member G	3	0	0	8421	0.03	0.5156	1.1	0.020678	0.103886	0.325331	1	-0.177744	0.305661	0.999548	-0.0956206	0.470095	1	0.372896	0.00395378	0.0586393
1875	Prr5l	72446	proline rich 5 like	3	0	0	1124	0.64	0.008177	0.3788	0.0207343	0.125584	0.325452	1	0.395771	0.500778	1	0.528868	0.339214	1	0.998775	0.00335628	0.0518075
1876	Zdhhc8	27801	zinc finger, DHHC domain containing 8	3	0	0	6189	-0.07	0.3144	1.049	0.0207242	0.895183	0.325452	1	0.0864998	0.466781	0.999548	-0.0042987	0.963764	0.993815	-0.281911	0.00126653	0.025097
1877	Atp13a2	74772	ATPase type 13A2	3	0	0	6303	-0.06	0.3245	1.053	0.0207529	0.974595	0.325491	1	0.000411722	0.991459	0.999548	-0.0553471	0.0937521	0.556642	-0.11917	0.00614087	0.0795202
1878	Ap1s1	11769	adaptor protein complex AP-1, sigma 1	3	0	0	5476	-0.08	0.2527	1.041	0.0208476	0.55106	0.326212	1	0.0137298	0.819847	0.999548	-0.0980427	0.0316155	0.34819	-0.15635	0.0221529	0.188105
1879	Reep3	28193	receptor accessory protein 3	3	0	0	5304	0.09	0.2384	1.055	0.0209121	0.251693	0.326968	1	-0.029681	0.631379	0.999548	0.153511	0.00201507	0.0601248	0.155322	0.453141	0.829477
1880	Tmem160	69094	transmembrane protein 160	3	0	0	4513	-0.12	0.1756	1.022	0.0209345	0.646822	0.327063	1	-0.146232	0.115785	0.999548	0.0113544	0.864825	0.978632	-0.214644	0.00576552	0.0762748
1881	Oser1	66680	oxidative stress responsive serine rich 1	3	0	0	8739	0.04	0.5438	1.087	0.0210145	0.095402	0.328057	1	-0.0784854	0.308638	0.999548	-0.0660349	0.456933	0.878264	0.25941	0.00411412	0.0603011
1882	Pgpep1	66522	pyroglutamyl-peptidase I	3	0	0	3008	0.22	0.07676	0.8522	0.0210443	0.288138	0.32822	1	0.0450121	0.660491	0.999548	0.181298	0.0614418	0.473591	0.422702	0.0143235	0.140606
1883	Otub2	68149	OTU domain, ubiquitin aldehyde binding 2	3	0	0	5473	-0.08	0.2525	1.041	0.0210576	0.157018	0.32822	1	-0.0521164	0.53949	0.999548	0.0943051	0.29157	0.808666	-0.285038	0.00369839	0.0557418
1884	Fam3c	27999	family with sequence similarity 3, member C	3	0	0	5778	-0.07	0.2785	1.043	0.0211338	0.765799	0.329154	1	-0.0676132	0.159807	0.999548	0.00502265	0.914896	0.987634	-0.148249	0.00399777	0.0590838
1885	Cabin1	104248	calcineurin binding protein 1	3	0	0	5627	-0.08	0.2655	1.039	0.0212287	0.600584	0.329356	1	0.0274736	0.843706	0.999548	-0.0499958	0.415434	0.866852	-0.226967	0.00167738	0.0313889
1886	Socs3	12702	suppressor of cytokine signaling 3	3	0	0	2740	0.36	0.06286	0.8175	0.021343	0.065248	0.330151	1	-0.24438	0.402583	1	0.465675	0.170932	1	0.867558	0.00860381	0.0999369
1887	Cmtm3	68119	CKLF-like MARVEL transmembrane domain containing 3	3	0	0	2892	0.26	0.07058	0.8358	0.0213459	0.489435	0.330151	1	0.0633921	0.737843	0.999548	0.055151	0.78807	1	0.652845	0.0010184	0.0216206
1888	Dot1l	208266	DOT1-like, histone H3 methyltransferase (S. cerevisiae)	3	0	0	2048	0.32	0.03306	0.6728	0.0215207	0.0785087	0.332268	1	0.184884	0.428193	0.999548	0.365834	0.0304925	1	0.403822	0.0458392	0.284733
1889	Pttg1ip	108705	pituitary tumor-transforming 1 interacting protein	3	0	0	7056	0.04	0.3922	1.103	0.0215485	0.201901	0.332268	1	-0.0693127	0.223737	0.999548	0.0304682	0.586651	0.924319	0.168216	0.00456756	0.064649
1890	Actr3b	242894	ARP3 actin-related protein 3B	3	0	0	8325	0.01	0.507	1.106	0.0215486	0.202184	0.332268	1	0.189588	0.00784423	0.509738	-0.0340302	0.586925	0.924319	-0.132837	0.130219	0.499338
1891	Qpct	70536	glutaminyl-peptide cyclotransferase (glutaminyl cyclase)	3	0	0	3732	0.16	0.1203	0.9784	0.02163	0.767743	0.333012	1	0.00851717	0.915669	0.999548	0.129278	0.203959	1	0.34338	0.00322598	0.0504049
1892	Fam126a	84652	family with sequence similarity 126, member A	3	0	0	3310	0.15	0.0939	0.9143	0.0217133	0.0623706	0.333783	1	0.208924	0.00656739	0.483917	0.0864496	0.396576	1	0.157648	0.23249	0.658706
1893	Ipo4	75751	importin 4	3	0	0	6064	-0.06	0.3034	1.045	0.0217328	0.13079	0.333828	1	0.0353925	0.507604	0.999548	-0.155548	0.00373475	0.0960861	-0.0513922	0.319776	0.74664
1894	Map3k13	71751	mitogen-activated protein kinase kinase kinase 13	3	0	0	3751	0.17	0.1215	0.9782	0.0218835	0.53491	0.335887	1	0.0863784	0.492055	0.999548	0.02764	0.811759	1	0.387882	0.00153149	0.0289985
1895	Tmem181a	77106	transmembrane protein 181A	3	0	0	4282	-0.1	0.1584	1.02	0.0220213	0.555809	0.337744	1	-0.0688443	0.301781	0.999548	-0.0113138	0.822196	0.974028	-0.20943	0.00248572	0.0418577
1896	Ppip5k2	227399	diphosphoinositol pentakisphosphate kinase 2	3	0	0	4557	0.17	0.1789	1.036	0.0220581	0.517388	0.338051	1	0.101393	0.242788	0.999548	-0.028752	0.802797	1	0.445954	0.00317128	0.049855
1897	Relch	227446	RAB11 binding and LisH domain, coiled-coil and HEAT repeat containing	3	0	0	4099	-0.1	0.1453	1.004	0.0221971	0.232291	0.339285	1	-0.0899276	0.162684	0.999548	-0.0289445	0.61472	0.931369	-0.17634	0.00623178	0.0804284
1898	Lrfn1	80749	leucine rich repeat and fibronectin type III domain containing 1	3	0	0	7632	-0.06	0.4445	1.127	0.0222061	0.32791	0.339285	1	0.0361763	0.689581	0.999548	0.0401174	0.516072	0.902892	-0.266525	0.00175214	0.0322682
1899	Slc12a5	57138	solute carrier family 12, member 5	3	0	0	4627	-0.1	0.1842	1.026	0.0224197	0.93793	0.341698	1	-0.00246773	0.978866	0.999548	-0.0589162	0.236028	0.766604	-0.224499	0.00273284	0.0445515
1900	Lrrtm4	243499	leucine rich repeat transmembrane neuronal 4	3	0	0	4960	0.12	0.2104	1.045	0.0224297	0.949797	0.341698	1	-0.002815	0.982977	0.999548	0.272988	0.00200408	1	0.0871511	0.320697	0.74742
1901	Ptk2b	19229	PTK2 protein tyrosine kinase 2 beta	3	0	0	6285	-0.04	0.3229	1.053	0.0224321	0.13793	0.341698	1	0.118495	0.0987208	0.999548	-0.032783	0.516677	0.902892	-0.219334	0.0123876	0.127067
1902	Gfm1	28030	G elongation factor, mitochondrial 1	3	0	0	3697	-0.12	0.118	0.984	0.0225161	0.260976	0.342547	1	-0.0479101	0.639048	0.999548	-0.102321	0.178206	0.703116	-0.197422	0.00557548	0.0748475
1903	Nol6	230082	nucleolar protein family 6 (RNA-associated)	3	0	0	5903	-0.07	0.2894	1.042	0.0225389	0.996551	0.342547	1	8.73e-05	0.998849	0.999548	-0.0958637	0.0221064	0.287482	-0.102728	0.0287936	0.218404
1904	Zbtb45	232879	zinc finger and BTB domain containing 45	3	0	0	5719	-0.09	0.2734	1.042	0.022538	0.401022	0.342547	1	0.0577455	0.489996	0.999548	-0.0291789	0.737433	0.955316	-0.287626	0.00175944	0.0323096
1905	Mapk15	332110	mitogen-activated protein kinase 15	3	0	0	2058	-0.24	0.03344	0.6521	0.0226277	0.246466	0.343378	1	-1.35343	0.0145239	1	1.00178	0.0701802	1	-0.373869	0.626978	1
1906	Mthfd2	17768	methylenetetrahydrofolate dehydrogenase (NAD+ dependent), methenyltetrahydrofolate cyclohydrolase	3	0	0	4873	-0.09	0.2034	1.031	0.0226519	0.196398	0.343486	1	-0.279509	0.00225372	0.291394	-0.0805986	0.488515	1	0.0769726	0.581272	0.892153
1907	Lancl2	71835	LanC (bacterial lantibiotic synthetase component C)-like 2	3	0	0	6565	0.06	0.3479	1.074	0.022701	0.15288	0.343712	1	0.030074	0.534708	0.999548	-0.0354455	0.448218	0.878264	0.187379	0.00267783	0.0442008
1908	Rpp40	208366	ribonuclease P 40 subunit	3	0	0	1392	-0.42	0.01358	0.4851	0.0228557	0.138653	0.345015	1	-0.187139	0.517579	0.999548	-0.427734	0.0711806	1	-0.644926	0.0175757	0.160918
1909	Msantd1	403174	Myb/SANT-like DNA-binding domain containing 1	3	0	0	2373	0.34	0.04591	0.7379	0.0228355	0.774385	0.345015	1	0.49108	0.0128417	0.620441	0.49254	0.0548449	1	0.0310729	0.918302	0.984663
1910	Tbcd	108903	tubulin-specific chaperone d	3	0	0	4910	-0.08	0.2064	1.03	0.0228459	0.160347	0.345015	1	-0.0314902	0.543276	0.999548	-0.0511349	0.226698	0.761013	-0.149662	0.00525457	0.0721361
1911	Stard8	236920	START domain containing 8	3	0	0	3360	0.09	0.09687	0.921	0.0228955	0.160458	0.345356	1	0.665556	0.21196	1	0.195702	0.543401	1	-0.606927	0.00563463	0.075252
1912	Actl6b	83766	actin-like 6B	3	0	0	6375	0.05	0.3309	1.067	0.0231916	0.0931976	0.348775	1	-0.0556466	0.298554	0.999548	0.157767	0.00487593	0.115103	0.0588119	0.453386	0.829477
1913	Csgalnact1	234356	chondroitin sulfate N-acetylgalactosaminyltransferase 1	3	0	0	8356	-0.02	0.5098	1.099	0.0232143	0.111044	0.348856	1	0.10608	0.237726	0.999548	0.0580947	0.480653	0.8854	-0.237439	0.0057836	0.0762748
1914	Phf23	78246	PHD finger protein 23	3	0	0	8309	0.03	0.5057	1.108	0.0232498	0.967069	0.349129	1	-0.00109427	0.9889	0.999548	-0.167323	0.0942534	0.55812	0.245261	0.0071044	0.0878304
1915	Xkr4	497097	X-linked Kx blood group related 4	3	0	0	3637	0.14	0.1141	0.9645	0.0232796	0.163044	0.349316	1	0.23562	0.00287558	0.322432	0.0606128	0.546305	0.914269	0.112742	0.422227	0.811564
1916	Dzip1l	72507	DAZ interacting protein 1-like	3	0	0	3511	0.18	0.1061	0.9431	0.0233655	0.463684	0.350082	1	0.104746	0.412548	0.999548	0.0336856	0.773999	1	0.405763	0.00208731	0.0367465
1917	C77080	97130	expressed sequence C77080	3	0	0	5019	-0.12	0.2151	1.029	0.0234285	0.490384	0.350764	1	0.238756	0.281534	0.999548	-0.0414632	0.788579	1	-0.555346	0.00301272	0.0481319
1918	Cd4	12504	CD4 antigen	3	0	0	1367	-0.57	0.01302	0.4856	0.0235805	0.750631	0.35095	1	0.542999	0.908815	1	0.632297	0.614452	1	-2.8875	0.00120797	1
1919	Ipcef1	320495	interaction protein for cytohesin exchange factors 1	3	0	0	2013	0.37	0.03181	0.6669	0.0235479	0.135856	0.35095	1	0.435452	0.138255	1	0.129655	0.514075	1	0.533254	0.0094738	0.105936
1920	Idua	15932	iduronidase, alpha-L	3	0	0	4165	0.16	0.15	1.012	0.0235254	0.160509	0.35095	1	0.581374	0.00429688	0.392898	-0.19437	0.287982	1	0.0944343	0.543458	0.875465
1921	Tspan33	232670	tetraspanin 33	3	0	0	4717	-0.11	0.1912	1.025	0.0235636	0.237884	0.35095	1	0.0700305	0.619615	0.999548	-0.116827	0.218033	1	-0.291579	0.00498844	0.0693014
1922	Ctbs	74245	chitobiase	3	0	0	3737	-0.17	0.1206	0.9875	0.0238225	0.0670935	0.353766	1	0.239337	0.406344	0.999548	-0.469865	0.0277317	1	-0.281826	0.0606687	0.331316
1923	Phkb	102093	phosphorylase kinase beta	3	0	0	7080	0.09	0.3944	1.104	0.0238135	0.375182	0.353766	1	0.354222	0.00186682	0.269733	-0.0315825	0.721241	0.95119	-0.0657492	0.507501	0.856967
1924	Fkbp1a	14225	FK506 binding protein 1a	3	0	0	5678	-0.05	0.2699	1.04	0.0239565	0.317593	0.355232	1	-0.0164638	0.682271	0.999548	-0.0248277	0.232719	0.762924	-0.122501	0.00433753	0.06236
1925	2020-09-02	18000	septin 2	3	0	0	4746	0.11	0.1934	1.043	0.0240115	0.809345	0.355523	1	0.00488227	0.931918	0.999548	0.039687	0.372311	0.850202	0.281746	0.00199093	0.0355888
1926	Rabggta	56187	Rab geranylgeranyl transferase, a subunit	3	0	0	5496	-0.08	0.2545	1.041	0.0240693	0.136618	0.356116	1	0.0543974	0.515034	0.999548	-0.0656111	0.413129	0.865576	-0.23502	0.00325678	0.050824
1927	Smpdl3b	100340	sphingomyelin phosphodiesterase, acid-like 3B	3	0	0	1972	-0.28	0.03037	0.6335	0.024113	0.0745039	0.356343	1	-0.200354	0.420784	0.999548	-0.378929	0.0146761	1	-0.275004	0.11248	0.463145
1928	Tbc1d23	67581	TBC1 domain family, member 23	3	0	0	4668	0.1	0.1873	1.04	0.0241201	0.2685	0.356343	1	0.0335516	0.632931	0.999548	0.0381442	0.645131	0.934976	0.229007	0.0017018	0.0317528
1929	Tbc1d8	54610	TBC1 domain family, member 8	3	0	0	3872	0.14	0.1296	0.9887	0.0241442	0.617543	0.356438	1	0.0674733	0.558294	0.999548	0.32615	0.00146351	1	0.02542	0.851574	0.972103
1930	Smc4	70099	structural maintenance of chromosomes 4	3	0	0	3063	-0.19	0.07975	0.8762	0.0241776	0.61116	0.356668	1	-0.358986	0.0042018	0.387406	-0.0228919	0.84863	1	-0.195847	0.195486	0.614457
1931	Yeats2	208146	YEATS domain containing 2	3	0	0	3783	0.15	0.1237	0.9797	0.0242783	0.988899	0.357892	1	0.000558511	0.996286	0.999548	0.175737	0.0216398	0.283926	0.261397	0.0325089	0.232901
1932	Tmem219	68742	transmembrane protein 219	3	0	0	4738	-0.06	0.1928	1.025	0.0244508	0.0633063	0.360169	1	0.265144	0.0819581	0.999548	-0.131719	0.39855	1	-0.313501	0.0216572	0.185399
1933	Trim3	55992	tripartite motif-containing 3	3	0	0	5716	-0.07	0.2731	1.042	0.024601	0.0601791	0.362118	1	-0.0831643	0.129385	0.999548	0.0492985	0.391876	0.855664	-0.161479	0.014065	0.138922
1934	Ubqln1	56085	ubiquilin 1	3	0	0	5853	-0.05	0.285	1.043	0.0246976	0.201355	0.363274	1	-0.0239417	0.586121	0.999548	-0.0315226	0.259963	0.785056	-0.0856151	0.00470447	0.0659297
1935	Srsf1	110809	serine/arginine-rich splicing factor 1	3	0	0	4460	-0.07	0.1715	1.022	0.0248338	0.25668	0.363934	1	-0.111453	0.0253264	0.807525	-0.0742928	0.0448584	0.411997	-0.0379958	0.635522	0.913063
1936	Polr2f	69833	polymerase (RNA) II (DNA directed) polypeptide F	3	0	0	5669	0.08	0.2692	1.057	0.0248137	0.464288	0.363934	1	-0.0202705	0.774335	0.999548	0.157942	0.00226517	0.0664527	0.0937998	0.411202	0.806052
1937	Epn1	13854	epsin 1	3	0	0	8821	-0.03	0.551	1.068	0.0250306	0.75728	0.365763	1	0.00639997	0.91149	0.999548	0.0384333	0.294889	0.813508	-0.133461	0.00271422	0.0444692
1938	Actn4	60595	actinin alpha 4	3	0	0	6128	-0.07	0.309	1.047	0.0250878	0.692507	0.366067	1	0.010866	0.884724	0.999548	-0.0443207	0.307509	0.818805	-0.162531	0.00268964	0.0442424
1939	Micall1	27008	microtubule associated monooxygenase, calponin and LIM domain containing -like 1	3	0	0	5334	0.11	0.2408	1.057	0.0250876	0.0847764	0.366067	1	0.0843682	0.287747	0.999548	-0.0489902	0.439297	0.875759	0.292926	0.00578879	0.0762748
1940	Snu13	20826	SNU13 homolog, small nuclear ribonucleoprotein (U4/U6.U5)	3	0	0	5840	0.08	0.2838	1.057	0.0251188	0.790315	0.366254	1	-0.00608147	0.924556	0.999548	0.0855086	0.0752683	0.516889	0.147901	0.0105322	0.114564
1941	Ier5	15939	immediate early response 5	3	0	0	8301	0.06	0.5049	1.109	0.02515	0.360741	0.366349	1	-0.0430362	0.711866	0.999548	-0.090639	0.495995	1	0.307651	0.00207921	0.0366591
1942	Penk	18619	preproenkephalin	3	0	0	7163	-0.08	0.4019	1.109	0.0251733	0.467155	0.366349	1	0.226089	0.175219	0.999548	0.0780119	0.775926	1	-0.54188	0.00540635	0.0735874
1943	Ankrd34a	545554	ankyrin repeat domain 34A	3	0	0	7693	-0.06	0.4501	1.128	0.0255258	0.300755	0.370309	1	0.0662614	0.511909	0.999548	0.0376297	0.669994	0.941911	-0.280576	0.00218268	0.0380584
1944	Sap30l	50724	SAP30-like	3	0	0	2698	0.28	0.06079	0.816	0.0256394	0.637125	0.371421	1	0.475209	0.0135847	0.639581	0.0326664	0.860481	1	0.337283	0.0644169	0.342778
1945	Chsy1	269941	chondroitin sulfate synthase 1	3	0	0	7239	0.03	0.4088	1.112	0.0256313	0.911024	0.371421	1	-0.142587	0.0528469	0.999548	0.00291427	0.969416	0.995323	0.232506	0.014692	0.143521
1946	Tgfb1i1	21804	transforming growth factor beta 1 induced transcript 1	3	0	0	5837	-0.08	0.2836	1.044	0.0256605	0.771704	0.371458	1	0.130714	0.245931	0.999548	-0.0134085	0.917241	1	-0.356476	0.00334167	0.0517321
1947	Thada	240174	thyroid adenoma associated	3	0	0	5188	-0.08	0.2288	1.034	0.0257125	0.0624386	0.371944	1	0.114463	0.311863	0.999548	-0.256318	0.00610904	1	-0.107136	0.39672	0.797371
1948	Slc2a13	239606	solute carrier family 2 (facilitated glucose transporter), member 13	3	0	0	7145	0.07	0.4002	1.107	0.0258082	0.930528	0.373059	1	0.26201	0.00109825	0.199486	-0.0347456	0.708382	0.95119	-0.00297448	0.976285	0.995951
1949	Cask	12361	calcium/calmodulin-dependent serine protein kinase (MAGUK family)	3	0	0	657.1	-0.96	0.002177	0.2621	0.0259437	0.219931	0.374749	1	-1.02912	0.603618	1	-0.0703032	0.312344	0.820114	-1.78393	0.00405645	0.0597298
1950	Tex2	21763	testis expressed gene 2	3	0	0	4666	-0.08	0.1872	1.026	0.0260831	0.987463	0.375484	1	-0.000368299	0.995804	0.999548	-0.165721	0.00353994	0.0933085	-0.0885256	0.218492	0.644038
1951	Uhmk1	16589	U2AF homology motif (UHM) kinase 1	3	0	0	5295	-0.06	0.2376	1.035	0.0260818	0.424047	0.375484	1	0.127221	0.751285	1	-0.165854	0.0147424	0.229857	-0.152653	0.0695352	0.358069
1952	Tmem254a	66039	transmembrane protein 254a	3	0	0	5666	-0.09	0.2689	1.041	0.0260757	0.54746	0.375484	1	0.0181244	0.818058	0.999548	-0.0217001	0.709171	0.95119	-0.276887	0.00132712	0.0260152
1953	Iws1	73473	IWS1, SUPT6 interacting protein	3	0	0	5371	0.08	0.2439	1.057	0.0260221	0.0812276	0.375484	1	-0.171115	0.123363	0.999548	0.302146	0.0143719	1	0.10713	0.43308	0.818089
1954	Fbxw5	30839	F-box and WD-40 domain protein 5	3	0	0	8021	-0.05	0.4797	1.127	0.026088	0.837924	0.375484	1	0.00403891	0.942761	0.999548	0.0172537	0.749262	0.958051	-0.175997	0.00109064	0.0227768
1955	Fndc9	320116	fibronectin type III domain containing 9	3	0	0	1422	0.5	0.01429	0.4751	0.0262479	0.22121	0.377246	1	0.457679	0.106342	1	0.190493	0.604786	1	0.848605	0.0120755	0.125301
1956	Ppp6r1	243819	protein phosphatase 6, regulatory subunit 1	3	0	0	4982	-0.08	0.2121	1.032	0.026737	0.538619	0.383179	1	-0.0132956	0.813631	0.999548	-0.0469474	0.222758	0.759902	-0.173931	0.00439064	0.0628445
1957	Pdgfrb	18596	platelet derived growth factor receptor, beta polypeptide	3	0	0	2261	-0.32	0.04124	0.7009	0.0269214	0.518197	0.384592	1	-0.54809	0.0248704	0.803304	-0.0540805	0.803214	1	-0.350568	0.0401989	0.261733
1958	Tmem178	68027	transmembrane protein 178	3	0	0	3970	0.12	0.1362	0.9991	0.0269312	0.296128	0.384592	1	0.0348238	0.666541	0.999548	0.194894	0.0110072	0.196062	0.12101	0.109504	0.457377
1959	Wipf1	215280	WAS/WASL interacting protein family, member 1	3	0	0	4080	0.19	0.1439	1.004	0.0268932	0.585974	0.384592	1	-0.0312281	0.836809	0.999548	0.394485	0.00484386	1	0.215057	0.197838	0.617443
1960	Bsdc1	100383	BSD domain containing 1	3	0	0	6571	0.05	0.3484	1.075	0.0269291	0.209506	0.384592	1	0.0446851	0.593925	0.999548	-0.0823375	0.275781	0.799958	0.186252	0.00490449	0.0684327
1961	Gaa	14387	glucosidase, alpha, acid	3	0	0	8798	-0.01	0.549	1.07	0.0269625	0.217395	0.384766	1	0.0565599	0.387923	0.999548	-0.113436	0.00344964	0.0914387	0.0246743	0.601289	0.898836
1962	Ywhaz	22631	tyrosine 3-monooxygenase/tryptophan 5-monooxygenase activation protein, zeta polypeptide	3	0	0	6413	-0.03	0.3343	1.057	0.0270047	0.727379	0.385095	1	-0.00355347	0.899333	0.999548	-0.0368365	0.0140363	0.223592	-0.0531237	0.0638741	0.340866
1963	Tkt	21881	transketolase	3	0	0	5557	-0.06	0.2596	1.038	0.0271107	0.116876	0.386332	1	-0.0302388	0.409239	0.999548	-0.0246226	0.488925	0.89058	-0.115891	0.00405065	0.0597132
1964	Adap1	231821	ArfGAP with dual PH domains 1	3	0	0	8121	-0.05	0.4888	1.12	0.0272971	0.456615	0.387801	1	0.0149112	0.770046	0.999548	0.0465159	0.371791	0.850202	-0.197365	0.00285667	0.0462752
1965	Slc25a1	13358	solute carrier family 25 (mitochondrial carrier, citrate transporter), member 1	3	0	0	5003	-0.11	0.2138	1.03	0.0273536	0.800226	0.388144	1	0.00502354	0.928405	0.999548	-0.0787651	0.198875	0.730413	-0.246364	0.00444164	0.0633578
1966	Ctgf	14219	connective tissue growth factor	3	0	0	2175	0.35	0.03784	0.6899	0.0274544	0.271265	0.389195	1	0.460625	0.085266	0.999548	0.496463	0.0149302	1	0.0885649	0.647338	0.915136
1967	Ly6e	17069	lymphocyte antigen 6 complex, locus E	3	0	0	5812	-0.08	0.2815	1.043	0.0274664	0.834176	0.389195	1	0.00439919	0.941353	0.999548	-0.052821	0.26229	0.785531	-0.176695	0.00333955	0.0517321
1968	Rabif	98710	RAB interacting factor	3	0	0	4551	-0.14	0.1784	1.022	0.0275902	0.143322	0.390674	1	0.088757	0.523325	0.999548	-0.351874	0.00835951	1	-0.144372	0.189606	0.607465
1969	2310022B05Rik	69551	RIKEN cDNA 2310022B05 gene	3	0	0	4189	-0.09	0.1517	1.013	0.0276465	0.0737299	0.391195	1	-0.106695	0.0206398	0.739026	-0.0347492	0.419322	0.867158	-0.133936	0.0960991	0.426918
1970	Ankle2	71782	ankyrin repeat and LEM domain containing 2	3	0	0	4687	0.13	0.1889	1.04	0.0279017	0.561326	0.394251	1	-0.027462	0.824907	0.999548	0.295914	0.00390496	1	0.137402	0.261353	0.687456
1971	Miga1	215708	mitoguardin 1	3	0	0	4862	-0.1	0.2025	1.03	0.028013	0.273415	0.395268	1	0.0417548	0.649044	0.999548	-0.156121	0.0551459	0.455263	-0.184774	0.0236455	0.19701
1972	Bcap29	12033	B cell receptor associated protein 29	3	0	0	3700	0.13	0.1182	0.9746	0.028211	0.0967062	0.397504	1	0.149994	0.0448666	0.956359	0.060452	0.459006	0.879523	0.174275	0.0414802	0.266543
1973	Ddx3x	13205	DEAD/H (Asp-Glu-Ala-Asp/His) box polypeptide 3, X-linked	3	0	0	5333	0.11	0.2408	1.058	0.028276	0.553284	0.397862	1	-0.0146002	0.820949	0.999548	0.0807137	0.315425	0.822757	0.252398	0.00330897	0.05145
1974	Rab31	106572	RAB31, member RAS oncogene family	3	0	0	5935	-0.05	0.2921	1.041	0.0283081	0.670679	0.398036	1	-0.0488392	0.225284	0.999548	-0.107039	0.00435166	0.105699	0.00737472	0.87533	0.975711
1975	Mcm3ap	54387	minichromosome maintenance complex component 3 associated protein	3	0	0	3786	-0.11	0.1238	0.9892	0.0283538	0.141053	0.398121	1	-0.158144	0.0224552	0.769868	-0.0474714	0.520548	0.904183	-0.121012	0.073571	0.371225
1976	Emx1	13796	empty spiracles homeobox 1	3	0	0	5272	-0.06	0.2358	1.033	0.0284676	0.178937	0.39944	1	-0.0611331	0.563508	0.999548	0.223448	0.131244	1	-0.351295	0.0116898	0.122666
1977	Mvb12a	73711	multivesicular body subunit 12A	3	0	0	4035	0.19	0.1408	0.999	0.0286109	0.91937	0.401171	1	-0.00465962	0.972367	0.999548	0.360358	0.00971832	1	0.208774	0.0920984	0.419647
1978	Hspa9	15526	heat shock protein 9	3	0	0	6465	-0.05	0.339	1.062	0.0286425	0.432478	0.401334	1	-0.0333228	0.467003	0.999548	-0.130157	0.00246794	0.0707636	0.0176685	0.756231	0.947216
1979	Fam13b	225358	family with sequence similarity 13, member B	3	0	0	8690	0.02	0.5395	1.089	0.0286865	0.372553	0.401392	1	-0.162527	0.0924479	0.999548	-0.0291051	0.719553	0.95119	0.263251	0.013129	0.13244
1980	Ano3	228432	anoctamin 3	3	0	0	1566	-0.41	0.01789	0.5426	0.0287189	0.590804	0.401566	1	-0.0969699	0.839101	1	-0.410096	0.245198	1	-0.718219	0.00425119	0.0617437
1981	Tuba1b	22143	tubulin, alpha 1B	3	0	0	5444	-0.06	0.25	1.04	0.0287496	0.125252	0.401715	1	-0.0324863	0.500335	0.999548	-0.0646883	0.011107	0.197242	-0.0698827	0.157615	0.553929
1982	Arfgef2	99371	ADP-ribosylation factor guanine nucleotide-exchange factor 2 (brefeldin A-inhibited)	3	0	0	3603	-0.14	0.1119	0.9814	0.02877	0.602048	0.401721	1	-0.0292148	0.844391	0.999548	-0.227713	0.00912774	0.172517	-0.162855	0.113751	0.466427
1983	Fbxo33	70611	F-box protein 33	3	0	0	4406	0.15	0.1675	1.024	0.0289137	0.591593	0.403168	1	-0.0225678	0.839475	0.999548	0.203746	0.0738543	1	0.260302	0.0142346	0.139948
1984	Rprml	104582	reprimo-like	3	0	0	4427	0.16	0.1691	1.024	0.0290831	0.333319	0.404716	1	-0.0571858	0.693351	0.999548	0.22574	0.0380186	1	0.298829	0.0337398	0.237731
1985	Lonp1	74142	lon peptidase 1, mitochondrial	3	0	0	7745	0.01	0.4547	1.138	0.0290851	0.546636	0.404716	1	-0.119426	0.0908179	0.999548	0.0132349	0.817648	0.973874	0.146359	0.0119782	0.124873
1986	Plxdc2	67448	plexin domain containing 2	3	0	0	4952	0.14	0.2097	1.044	0.0291985	0.983342	0.406012	1	0.362509	0.00142806	0.235822	-0.000774864	0.994416	1	0.0586714	0.629587	0.91151
1987	Nat8l	269642	N-acetyltransferase 8-like	3	0	0	8164	-0.04	0.4926	1.117	0.0293066	0.876276	0.407235	1	0.00454247	0.95693	0.999548	0.0543741	0.381162	0.854319	-0.189974	0.00246326	0.0418229
1988	Pdgfa	18590	platelet derived growth factor, alpha	3	0	0	4840	-0.11	0.2008	1.027	0.0294148	0.388792	0.408455	1	-0.220988	0.0111909	0.602156	0.033477	0.729859	0.953358	-0.130123	0.110539	0.459148
1989	Hnrnpk	15387	heterogeneous nuclear ribonucleoprotein K	3	0	0	5760	0.05	0.277	1.06	0.0295369	0.428609	0.409602	1	0.0102664	0.753969	0.999548	0.0396804	0.149996	0.669825	0.0973439	0.00802734	0.0951739
1990	Kcnc4	99738	potassium voltage gated channel, Shaw-related subfamily, member 4	3	0	0	5000	0.11	0.2136	1.046	0.0295717	0.178142	0.409786	1	-0.106678	0.562672	0.999548	0.26865	0.0149087	1	0.165615	0.10839	0.454804
1991	Lrfn4	225875	leucine rich repeat and fibronectin type III domain containing 4	3	0	0	6516	0.06	0.3435	1.072	0.0296524	0.400039	0.410621	1	-0.0171756	0.73683	0.999548	0.0262506	0.646714	0.934976	0.181209	0.00191503	0.0345218
[truncated: 18,116 more rows]
